# Supplementary material for: The architecture of oceanic plateaus revealed by the volcanic stratigraphy of the accreted Wrangellia oceanic plateau
Source: Oxford University Press journal article supplement (doi:10.1130/ges00212.1), 2010-02-01
Supplement: supplement_1715613_Supp_Data5.xls [file supplement_1715613_Supp_Data5.xls]

## Sheet: Age
Sample No.	Age	err_plus	err_minus	Age_method	Material	Age_interpretation	Rel_rating	Age_note	Authors	Year	Ref No.	Laboratory	Geologic unit	Region (for A. Greene)	Rock type	Rock description	Province/State	MapName	NTSRef	nts50	Text97	lat83	long83	easting83	northing83	utm zone	lat27	long27	easting27	northing27	Terrane	Belt
PSM96-027	3209.3	2.4	2.4	U/Pb	Zircon	Detrital	B	Fraction E, 14.2% discordant	Mahoney, J.B., Mustard, P.S., Haggart, J.W., Friedman, R.M., Fanning, C.M. and McNicoll, V.J.	1999	1579	University of British Columbia; R. Friedman	Protection Formation, Nanaimo Group		Sedimentary	not reported	British Columbia	Vancouver	92G	4	16837	49.1721	123.92	432950	5447000	10	49.1723	123.919	433047	5446800	WRANGELLIA	Insular
PSM97-004	2653	4	4	U/Pb	Zircon	Detrital	B	Spot 19.1, 7% discordant	Mahoney, J.B., Mustard, P.S., Haggart, J.W., Friedman, R.M., Fanning, C.M. and McNicoll, V.J.	1999	1579	Australian National University, Canberra; M. Fanning	DeCourcy Formation, Nanaimo Group		Sedimentary	not reported	British Columbia	Vancouver	92G	4	16908	49.15	123.8	441662	5444439	10	49.1502	123.799	441759	5444239	WRANGELLIA	Insular
PSM97-004	2632	15	15	U/Pb	Zircon	Detrital	A	Spot 1.1, 3% discordant	Mahoney, J.B., Mustard, P.S., Haggart, J.W., Friedman, R.M., Fanning, C.M. and McNicoll, V.J.	1999	1579	Australian National University, Canberra; M. Fanning	DeCourcy Formation, Nanaimo Group		Sedimentary	not reported	British Columbia	Vancouver	92G	4	16890	49.15	123.8	441662	5444439	10	49.1502	123.799	441759	5444239	WRANGELLIA	Insular
HFB-95-31	2584	3	3	U/Pb	Zircon	Detrital	A	Fraction C1 , 1.74% discordant. Age is 207Pb/206Pb age.	Mahoney, J.B., Mustard, P.S., Haggart, J.W., Friedman, R.M., Fanning, C.M. and McNicoll, V.J.	1999	1579	Geological Survey of Canada, V. McNicoll	Haida Formation, Queen Charlotte basin		Sedimentary	not reported	British Columbia	Hecate Strait	103G	4	16812	53.2374	131.872	308325	5902525	9	53.2376	131.871	308434	5902330	WRANGELLIA	Insular
MVM-90-61	2510.1	4	4	U/Pb	Zircon	Detrital	A	Fraction D , 0.29% discordant. Age is 207Pb/206Pb age.	Mustard, P.S., Parrish, R.R. and McNicoll, V.	1995	1519	Geological Survey of Canada (Ottawa); R. Parrish and V. McNicoll	Gabriola Formation, Nanaimo Group		Sedimentary	from base of a massive coarse-grained thick bed of arkosic arenite within a succession of sandstone turbidites and minor mudstone	British Columbia	Vancouver	92G	4	16124	49.1999	123.816	440550	5450000	10	49.2001	123.815	440647	5449800	WRANGELLIA	Insular
PSM97-001	2418	8	8	U/Pb	Zircon	Detrital	B	Spot 22.1, 7% discordant	Mahoney, J.B., Mustard, P.S., Haggart, J.W., Friedman, R.M., Fanning, C.M. and McNicoll, V.J.	1999	1579	Australian National University, Canberra; M. Fanning	Protection Formation, Nanaimo Group		Sedimentary	not reported	British Columbia	Vancouver	92G	4	16960	49.1456	123.787	442634	5443941	10	49.1458	123.785	442731	5443741	WRANGELLIA	Insular
PSM97-004	2387	11	11	U/Pb	Zircon	Detrital	B	Spot 2.1, 13% discordant	Mahoney, J.B., Mustard, P.S., Haggart, J.W., Friedman, R.M., Fanning, C.M. and McNicoll, V.J.	1999	1579	Australian National University, Canberra; M. Fanning	DeCourcy Formation, Nanaimo Group		Sedimentary	not reported	British Columbia	Vancouver	92G	4	16891	49.15	123.8	441662	5444439	10	49.1502	123.799	441759	5444239	WRANGELLIA	Insular
PSM97-004	2265	10	10	U/Pb	Zircon	Detrital	B	Spot 44.1, 8% discordant	Mahoney, J.B., Mustard, P.S., Haggart, J.W., Friedman, R.M., Fanning, C.M. and McNicoll, V.J.	1999	1579	Australian National University, Canberra; M. Fanning	DeCourcy Formation, Nanaimo Group		Sedimentary	not reported	British Columbia	Vancouver	92G	4	16932	49.15	123.8	441662	5444439	10	49.1502	123.799	441759	5444239	WRANGELLIA	Insular
HFB-95-36	2033	22	22	U/Pb	Zircon	Detrital	A	Fraction C4 , 1.62% discordant. Age is 207Pb/206Pb age.	Mahoney, J.B., Mustard, P.S., Haggart, J.W., Friedman, R.M., Fanning, C.M. and McNicoll, V.J.	1999	1579	Geological Survey of Canada, V. McNicoll	Longarm Formation, Queen Charlotte basin		Sedimentary	not reported	British Columbia	Graham Island	103F	1	16805	53.1304	132.147	690850	5890575	8	53.1306	132.146	690970	5890391	WRANGELLIA	Insular
HFB-95-36	2025	6	6	U/Pb	Zircon	Detrital	A	Fraction C2 , 1.23% discordant. Age is 207Pb/206Pb age.	Mahoney, J.B., Mustard, P.S., Haggart, J.W., Friedman, R.M., Fanning, C.M. and McNicoll, V.J.	1999	1579	Geological Survey of Canada, V. McNicoll	Longarm Formation, Queen Charlotte basin		Sedimentary	not reported	British Columbia	Graham Island	103F	1	16804	53.1304	132.147	690850	5890575	8	53.1306	132.146	690970	5890391	WRANGELLIA	Insular
PSM97-001	1871	35	35	U/Pb	Zircon	Detrital	C	Spot 38b.1, 17% discordant	Mahoney, J.B., Mustard, P.S., Haggart, J.W., Friedman, R.M., Fanning, C.M. and McNicoll, V.J.	1999	1579	Australian National University, Canberra; M. Fanning	Protection Formation, Nanaimo Group		Sedimentary	not reported	British Columbia	Vancouver	92G	4	16978	49.1456	123.787	442634	5443941	10	49.1458	123.785	442731	5443741	WRANGELLIA	Insular
PSM97-004	1847	7	7	U/Pb	Zircon	Detrital	A	Spot 27.1, 4% discordant	Mahoney, J.B., Mustard, P.S., Haggart, J.W., Friedman, R.M., Fanning, C.M. and McNicoll, V.J.	1999	1579	Australian National University, Canberra; M. Fanning	DeCourcy Formation, Nanaimo Group		Sedimentary	not reported	British Columbia	Vancouver	92G	4	16916	49.15	123.8	441662	5444439	10	49.1502	123.799	441759	5444239	WRANGELLIA	Insular
PSM96-028A	1829.3	4.6	4.6	U/Pb	Zircon	Detrital	B	Fraction I, 9.5% discordant	Mahoney, J.B., Mustard, P.S., Haggart, J.W., Friedman, R.M., Fanning, C.M. and McNicoll, V.J.	1999	1579	University of British Columbia; R. Friedman	DeCourcy Formation, Nanaimo Group		Sedimentary	not reported	British Columbia	Vancouver	92G	4	16832	49.1458	123.883	435639	5444034	10	49.1459	123.881	435736	5443834	WRANGELLIA	Insular
PSM96-027	1827.1	2.7	2.7	U/Pb	Zircon	Detrital	B	Fraction C, 9.0% discordant	Mahoney, J.B., Mustard, P.S., Haggart, J.W., Friedman, R.M., Fanning, C.M. and McNicoll, V.J.	1999	1579	University of British Columbia; R. Friedman	Protection Formation, Nanaimo Group		Sedimentary	not reported	British Columbia	Vancouver	92G	4	16836	49.1721	123.92	432950	5447000	10	49.1723	123.919	433047	5446800	WRANGELLIA	Insular
PSM97-001	1811	12	12	U/Pb	Zircon	Detrital	B	Spot 42.1, 10% discordant	Mahoney, J.B., Mustard, P.S., Haggart, J.W., Friedman, R.M., Fanning, C.M. and McNicoll, V.J.	1999	1579	Australian National University, Canberra; M. Fanning	Protection Formation, Nanaimo Group		Sedimentary	not reported	British Columbia	Vancouver	92G	4	16982	49.1456	123.787	442634	5443941	10	49.1458	123.785	442731	5443741	WRANGELLIA	Insular
PSM96-028A	1805.9	3.1	3.1	U/Pb	Zircon	Detrital	B	Fraction F, 9.4% discordant	Mahoney, J.B., Mustard, P.S., Haggart, J.W., Friedman, R.M., Fanning, C.M. and McNicoll, V.J.	1999	1579	University of British Columbia; R. Friedman	DeCourcy Formation, Nanaimo Group		Sedimentary	not reported	British Columbia	Vancouver	92G	4	16829	49.1458	123.883	435639	5444034	10	49.1459	123.881	435736	5443834	WRANGELLIA	Insular
PSM97-001	1805	12	12	U/Pb	Zircon	Detrital	B	Spot 16.1, 8% discordant	Mahoney, J.B., Mustard, P.S., Haggart, J.W., Friedman, R.M., Fanning, C.M. and McNicoll, V.J.	1999	1579	Australian National University, Canberra; M. Fanning	Protection Formation, Nanaimo Group		Sedimentary	not reported	British Columbia	Vancouver	92G	4	16954	49.1456	123.787	442634	5443941	10	49.1458	123.785	442731	5443741	WRANGELLIA	Insular
PSM96-028A	1794.2	3.2	3.2	U/Pb	Zircon	Detrital	B	Fraction J, 6.3% discordant	Mahoney, J.B., Mustard, P.S., Haggart, J.W., Friedman, R.M., Fanning, C.M. and McNicoll, V.J.	1999	1579	University of British Columbia; R. Friedman	DeCourcy Formation, Nanaimo Group		Sedimentary	not reported	British Columbia	Vancouver	92G	4	16833	49.1458	123.883	435639	5444034	10	49.1459	123.881	435736	5443834	WRANGELLIA	Insular
PSM97-004	1784	104	104	U/Pb	Zircon	Detrital	A	Spot 11.1, -4% discordant	Mahoney, J.B., Mustard, P.S., Haggart, J.W., Friedman, R.M., Fanning, C.M. and McNicoll, V.J.	1999	1579	Australian National University, Canberra; M. Fanning	DeCourcy Formation, Nanaimo Group		Sedimentary	not reported	British Columbia	Vancouver	92G	4	16900	49.15	123.8	441662	5444439	10	49.1502	123.799	441759	5444239	WRANGELLIA	Insular
MVM-90-61	1776.7	3	3	U/Pb	Zircon	Detrital	A	Fraction B , 0.48% discordant. Age is 207Pb/206Pb age.	Mustard, P.S., Parrish, R.R. and McNicoll, V.	1995	1519	Geological Survey of Canada (Ottawa); R. Parrish and V. McNicoll	Gabriola Formation, Nanaimo Group		Sedimentary	from base of a massive coarse-grained thick bed of arkosic arenite within a succession of sandstone turbidites and minor mudstone	British Columbia	Vancouver	92G	4	16122	49.1999	123.816	440550	5450000	10	49.2001	123.815	440647	5449800	WRANGELLIA	Insular
PSM96-027	1771.4	3.1	3.1	U/Pb	Zircon	Detrital	B	Fraction G, 9.5% discordant	Mahoney, J.B., Mustard, P.S., Haggart, J.W., Friedman, R.M., Fanning, C.M. and McNicoll, V.J.	1999	1579	University of British Columbia; R. Friedman	Protection Formation, Nanaimo Group		Sedimentary	not reported	British Columbia	Vancouver	92G	4	16838	49.1721	123.92	432950	5447000	10	49.1723	123.919	433047	5446800	WRANGELLIA	Insular
PSM96-028A	1765.1	3	3	U/Pb	Zircon	Detrital	B	Fraction H, 10.8% discordant	Mahoney, J.B., Mustard, P.S., Haggart, J.W., Friedman, R.M., Fanning, C.M. and McNicoll, V.J.	1999	1579	University of British Columbia; R. Friedman	DeCourcy Formation, Nanaimo Group		Sedimentary	not reported	British Columbia	Vancouver	92G	4	16831	49.1458	123.883	435639	5444034	10	49.1459	123.881	435736	5443834	WRANGELLIA	Insular
PSM96-028A	1757.4	4.1	4.1	U/Pb	Zircon	Detrital	B	Fraction D, 13.1% discordant	Mahoney, J.B., Mustard, P.S., Haggart, J.W., Friedman, R.M., Fanning, C.M. and McNicoll, V.J.	1999	1579	University of British Columbia; R. Friedman	DeCourcy Formation, Nanaimo Group		Sedimentary	not reported	British Columbia	Vancouver	92G	4	16828	49.1458	123.883	435639	5444034	10	49.1459	123.881	435736	5443834	WRANGELLIA	Insular
PSM97-001	1750	13	13	U/Pb	Zircon	Detrital	B	Spot 29.1, 10% discordant	Mahoney, J.B., Mustard, P.S., Haggart, J.W., Friedman, R.M., Fanning, C.M. and McNicoll, V.J.	1999	1579	Australian National University, Canberra; M. Fanning	Protection Formation, Nanaimo Group		Sedimentary	not reported	British Columbia	Vancouver	92G	4	16967	49.1456	123.787	442634	5443941	10	49.1458	123.785	442731	5443741	WRANGELLIA	Insular
PSM97-001	1741	25	25	U/Pb	Zircon	Detrital	C	Spot 39.1, 17% discordant	Mahoney, J.B., Mustard, P.S., Haggart, J.W., Friedman, R.M., Fanning, C.M. and McNicoll, V.J.	1999	1579	Australian National University, Canberra; M. Fanning	Protection Formation, Nanaimo Group		Sedimentary	not reported	British Columbia	Vancouver	92G	4	16979	49.1456	123.787	442634	5443941	10	49.1458	123.785	442731	5443741	WRANGELLIA	Insular
PSM96-028A	1739.8	6.4	6.4	U/Pb	Zircon	Detrital	B	Fraction C, 8.1% discordant	Mahoney, J.B., Mustard, P.S., Haggart, J.W., Friedman, R.M., Fanning, C.M. and McNicoll, V.J.	1999	1579	University of British Columbia; R. Friedman	DeCourcy Formation, Nanaimo Group		Sedimentary	not reported	British Columbia	Vancouver	92G	4	16827	49.1458	123.883	435639	5444034	10	49.1459	123.881	435736	5443834	WRANGELLIA	Insular
PSM97-001	1739	16	16	U/Pb	Zircon	Detrital	B	Spot 13.1, 8% discordant	Mahoney, J.B., Mustard, P.S., Haggart, J.W., Friedman, R.M., Fanning, C.M. and McNicoll, V.J.	1999	1579	Australian National University, Canberra; M. Fanning	Protection Formation, Nanaimo Group		Sedimentary	not reported	British Columbia	Vancouver	92G	4	16951	49.1456	123.787	442634	5443941	10	49.1458	123.785	442731	5443741	WRANGELLIA	Insular
PSM97-001	1737	17	17	U/Pb	Zircon	Detrital	C	Spot 45.1, 25% discordant	Mahoney, J.B., Mustard, P.S., Haggart, J.W., Friedman, R.M., Fanning, C.M. and McNicoll, V.J.	1999	1579	Australian National University, Canberra; M. Fanning	Protection Formation, Nanaimo Group		Sedimentary	not reported	British Columbia	Vancouver	92G	4	16984	49.1456	123.787	442634	5443941	10	49.1458	123.785	442731	5443741	WRANGELLIA	Insular
PSM97-004	1735	9	9	U/Pb	Zircon	Detrital	B	Spot 45.1, 12% discordant	Mahoney, J.B., Mustard, P.S., Haggart, J.W., Friedman, R.M., Fanning, C.M. and McNicoll, V.J.	1999	1579	Australian National University, Canberra; M. Fanning	DeCourcy Formation, Nanaimo Group		Sedimentary	not reported	British Columbia	Vancouver	92G	4	16933	49.15	123.8	441662	5444439	10	49.1502	123.799	441759	5444239	WRANGELLIA	Insular
PSM97-001	1731	30	30	U/Pb	Zircon	Detrital	B	Spot 5.1, 13% discordant	Mahoney, J.B., Mustard, P.S., Haggart, J.W., Friedman, R.M., Fanning, C.M. and McNicoll, V.J.	1999	1579	Australian National University, Canberra; M. Fanning	Protection Formation, Nanaimo Group		Sedimentary	not reported	British Columbia	Vancouver	92G	4	16943	49.1456	123.787	442634	5443941	10	49.1458	123.785	442731	5443741	WRANGELLIA	Insular
MVM-90-61	1724.5	5	5	U/Pb	Zircon	Detrital	A	Fraction A , 0.01% discordant. Age is 207Pb/206Pb age.	Mustard, P.S., Parrish, R.R. and McNicoll, V.	1995	1519	Geological Survey of Canada (Ottawa); R. Parrish and V. McNicoll	Gabriola Formation, Nanaimo Group		Sedimentary	from base of a massive coarse-grained thick bed of arkosic arenite within a succession of sandstone turbidites and minor mudstone	British Columbia	Vancouver	92G	4	16121	49.1999	123.816	440550	5450000	10	49.2001	123.815	440647	5449800	WRANGELLIA	Insular
PSM97-001	1720	14	14	U/Pb	Zircon	Detrital	A	Spot 11.1, -1% discordant	Mahoney, J.B., Mustard, P.S., Haggart, J.W., Friedman, R.M., Fanning, C.M. and McNicoll, V.J.	1999	1579	Australian National University, Canberra; M. Fanning	Protection Formation, Nanaimo Group		Sedimentary	not reported	British Columbia	Vancouver	92G	4	16949	49.1456	123.787	442634	5443941	10	49.1458	123.785	442731	5443741	WRANGELLIA	Insular
PSM97-001	1719	19	19	U/Pb	Zircon	Detrital	B	Spot 27.1, 12% discordant	Mahoney, J.B., Mustard, P.S., Haggart, J.W., Friedman, R.M., Fanning, C.M. and McNicoll, V.J.	1999	1579	Australian National University, Canberra; M. Fanning	Protection Formation, Nanaimo Group		Sedimentary	not reported	British Columbia	Vancouver	92G	4	16965	49.1456	123.787	442634	5443941	10	49.1458	123.785	442731	5443741	WRANGELLIA	Insular
PSM96-027	1718.6	3.4	3.4	U/Pb	Zircon	Detrital	B	Fraction H, 12.3% discordant	Mahoney, J.B., Mustard, P.S., Haggart, J.W., Friedman, R.M., Fanning, C.M. and McNicoll, V.J.	1999	1579	University of British Columbia; R. Friedman	Protection Formation, Nanaimo Group		Sedimentary	not reported	British Columbia	Vancouver	92G	4	16839	49.1721	123.92	432950	5447000	10	49.1723	123.919	433047	5446800	WRANGELLIA	Insular
PSM97-004	1714	9	9	U/Pb	Zircon	Detrital	B	Spot 36.1, 7% discordant	Mahoney, J.B., Mustard, P.S., Haggart, J.W., Friedman, R.M., Fanning, C.M. and McNicoll, V.J.	1999	1579	Australian National University, Canberra; M. Fanning	DeCourcy Formation, Nanaimo Group		Sedimentary	not reported	British Columbia	Vancouver	92G	4	16924	49.15	123.8	441662	5444439	10	49.1502	123.799	441759	5444239	WRANGELLIA	Insular
PSM97-001	1707	20	20	U/Pb	Zircon	Detrital	B	Spot 4.1, 11% discordant	Mahoney, J.B., Mustard, P.S., Haggart, J.W., Friedman, R.M., Fanning, C.M. and McNicoll, V.J.	1999	1579	Australian National University, Canberra; M. Fanning	Protection Formation, Nanaimo Group		Sedimentary	not reported	British Columbia	Vancouver	92G	4	16942	49.1456	123.787	442634	5443941	10	49.1458	123.785	442731	5443741	WRANGELLIA	Insular
PSM97-004	1705	9	9	U/Pb	Zircon	Detrital	A	Spot 25.1, -2% discordant	Mahoney, J.B., Mustard, P.S., Haggart, J.W., Friedman, R.M., Fanning, C.M. and McNicoll, V.J.	1999	1579	Australian National University, Canberra; M. Fanning	DeCourcy Formation, Nanaimo Group		Sedimentary	not reported	British Columbia	Vancouver	92G	4	16914	49.15	123.8	441662	5444439	10	49.1502	123.799	441759	5444239	WRANGELLIA	Insular
PSM96-028A	1703.2	3	3	U/Pb	Zircon	Detrital	A	Fraction B, 4.9% discordant	Mahoney, J.B., Mustard, P.S., Haggart, J.W., Friedman, R.M., Fanning, C.M. and McNicoll, V.J.	1999	1579	University of British Columbia; R. Friedman	DeCourcy Formation, Nanaimo Group		Sedimentary	not reported	British Columbia	Vancouver	92G	4	16826	49.1458	123.883	435639	5444034	10	49.1459	123.881	435736	5443834	WRANGELLIA	Insular
PSM97-004	1702	7	7	U/Pb	Zircon	Detrital	A	Spot 20.1, -3 %discordant	Mahoney, J.B., Mustard, P.S., Haggart, J.W., Friedman, R.M., Fanning, C.M. and McNicoll, V.J.	1999	1579	Australian National University, Canberra; M. Fanning	DeCourcy Formation, Nanaimo Group		Sedimentary	not reported	British Columbia	Vancouver	92G	4	16909	49.15	123.8	441662	5444439	10	49.1502	123.799	441759	5444239	WRANGELLIA	Insular
PSM97-001	1702	65	65	U/Pb	Zircon	Detrital	B	Spot 34.1, 14% discordant	Mahoney, J.B., Mustard, P.S., Haggart, J.W., Friedman, R.M., Fanning, C.M. and McNicoll, V.J.	1999	1579	Australian National University, Canberra; M. Fanning	Protection Formation, Nanaimo Group		Sedimentary	not reported	British Columbia	Vancouver	92G	4	16973	49.1456	123.787	442634	5443941	10	49.1458	123.785	442731	5443741	WRANGELLIA	Insular
PSM97-001	1700	6	6	U/Pb	Zircon	Detrital	A	Spot 14.1, 1% discordant	Mahoney, J.B., Mustard, P.S., Haggart, J.W., Friedman, R.M., Fanning, C.M. and McNicoll, V.J.	1999	1579	Australian National University, Canberra; M. Fanning	Protection Formation, Nanaimo Group		Sedimentary	not reported	British Columbia	Vancouver	92G	4	16952	49.1456	123.787	442634	5443941	10	49.1458	123.785	442731	5443741	WRANGELLIA	Insular
PSM97-004	1696	17	17	U/Pb	Zircon	Detrital	A	Spot 49.1, 4% discordant	Mahoney, J.B., Mustard, P.S., Haggart, J.W., Friedman, R.M., Fanning, C.M. and McNicoll, V.J.	1999	1579	Australian National University, Canberra; M. Fanning	DeCourcy Formation, Nanaimo Group		Sedimentary	not reported	British Columbia	Vancouver	92G	4	16937	49.15	123.8	441662	5444439	10	49.1502	123.799	441759	5444239	WRANGELLIA	Insular
PSM97-004	1695	42	42	U/Pb	Zircon	Detrital	A	Spot 43.1, 3% discordant	Mahoney, J.B., Mustard, P.S., Haggart, J.W., Friedman, R.M., Fanning, C.M. and McNicoll, V.J.	1999	1579	Australian National University, Canberra; M. Fanning	DeCourcy Formation, Nanaimo Group		Sedimentary	not reported	British Columbia	Vancouver	92G	4	16931	49.15	123.8	441662	5444439	10	49.1502	123.799	441759	5444239	WRANGELLIA	Insular
PSM96-029	1694.2	3	3	U/Pb	Zircon	Detrital	B	Fraction A, 11.2% discordant	Mahoney, J.B., Mustard, P.S., Haggart, J.W., Friedman, R.M., Fanning, C.M. and McNicoll, V.J.	1999	1579	University of British Columbia; R. Friedman	Geoffrey Formation, Nanaimo Group		Sedimentary	not reported	British Columbia	Vancouver	92G	4	16820	49.1399	123.792	442220	5443310	10	49.1401	123.791	442317	5443110	WRANGELLIA	Insular
PSM97-004	1686	15	15	U/Pb	Zircon	Detrital	C	Spot 15.1, 25% discordant	Mahoney, J.B., Mustard, P.S., Haggart, J.W., Friedman, R.M., Fanning, C.M. and McNicoll, V.J.	1999	1579	Australian National University, Canberra; M. Fanning	DeCourcy Formation, Nanaimo Group		Sedimentary	not reported	British Columbia	Vancouver	92G	4	16904	49.15	123.8	441662	5444439	10	49.1502	123.799	441759	5444239	WRANGELLIA	Insular
PSM96-028A	1686	2.7	2.7	U/Pb	Zircon	Detrital	A	Fraction A, 4.6% discordant	Mahoney, J.B., Mustard, P.S., Haggart, J.W., Friedman, R.M., Fanning, C.M. and McNicoll, V.J.	1999	1579	University of British Columbia; R. Friedman	DeCourcy Formation, Nanaimo Group		Sedimentary	not reported	British Columbia	Vancouver	92G	4	16825	49.1458	123.883	435639	5444034	10	49.1459	123.881	435736	5443834	WRANGELLIA	Insular
PSM96-029	1682.5	2.7	2.7	U/Pb	Zircon	Detrital	A	Fraction D, 0.9% discordant	Mahoney, J.B., Mustard, P.S., Haggart, J.W., Friedman, R.M., Fanning, C.M. and McNicoll, V.J.	1999	1579	University of British Columbia; R. Friedman	Geoffrey Formation, Nanaimo Group		Sedimentary	not reported	British Columbia	Vancouver	92G	4	16823	49.1399	123.792	442220	5443310	10	49.1401	123.791	442317	5443110	WRANGELLIA	Insular
PSM97-001	1680	12	12	U/Pb	Zircon	Detrital	B	Spot 26.1, 14% discordant	Mahoney, J.B., Mustard, P.S., Haggart, J.W., Friedman, R.M., Fanning, C.M. and McNicoll, V.J.	1999	1579	Australian National University, Canberra; M. Fanning	Protection Formation, Nanaimo Group		Sedimentary	not reported	British Columbia	Vancouver	92G	4	16964	49.1456	123.787	442634	5443941	10	49.1458	123.785	442731	5443741	WRANGELLIA	Insular
PSM97-001	1680	25	25	U/Pb	Zircon	Detrital	B	Spot 40.1, 11% discordant	Mahoney, J.B., Mustard, P.S., Haggart, J.W., Friedman, R.M., Fanning, C.M. and McNicoll, V.J.	1999	1579	Australian National University, Canberra; M. Fanning	Protection Formation, Nanaimo Group		Sedimentary	not reported	British Columbia	Vancouver	92G	4	16980	49.1456	123.787	442634	5443941	10	49.1458	123.785	442731	5443741	WRANGELLIA	Insular
PSM96-028A	1676.2	4.8	4.8	U/Pb	Zircon	Detrital	B	Fraction G, 13.9% discordant	Mahoney, J.B., Mustard, P.S., Haggart, J.W., Friedman, R.M., Fanning, C.M. and McNicoll, V.J.	1999	1579	University of British Columbia; R. Friedman	DeCourcy Formation, Nanaimo Group		Sedimentary	not reported	British Columbia	Vancouver	92G	4	16830	49.1458	123.883	435639	5444034	10	49.1459	123.881	435736	5443834	WRANGELLIA	Insular
PSM97-004	1673	33	33	U/Pb	Zircon	Detrital	A	Spot 14.1, 0% discordant	Mahoney, J.B., Mustard, P.S., Haggart, J.W., Friedman, R.M., Fanning, C.M. and McNicoll, V.J.	1999	1579	Australian National University, Canberra; M. Fanning	DeCourcy Formation, Nanaimo Group		Sedimentary	not reported	British Columbia	Vancouver	92G	4	16903	49.15	123.8	441662	5444439	10	49.1502	123.799	441759	5444239	WRANGELLIA	Insular
PSM96-027	1670.7	2.6	2.6	U/Pb	Zircon	Detrital	B	Fraction B, 5.4% discordant	Mahoney, J.B., Mustard, P.S., Haggart, J.W., Friedman, R.M., Fanning, C.M. and McNicoll, V.J.	1999	1579	University of British Columbia; R. Friedman	Protection Formation, Nanaimo Group		Sedimentary	not reported	British Columbia	Vancouver	92G	4	16835	49.1721	123.92	432950	5447000	10	49.1723	123.919	433047	5446800	WRANGELLIA	Insular
PSM96-029	1667.5	3.8	3.8	U/Pb	Zircon	Detrital	B	Fraction B, 5.6% discordant	Mahoney, J.B., Mustard, P.S., Haggart, J.W., Friedman, R.M., Fanning, C.M. and McNicoll, V.J.	1999	1579	University of British Columbia; R. Friedman	Geoffrey Formation, Nanaimo Group		Sedimentary	not reported	British Columbia	Vancouver	92G	4	16821	49.1399	123.792	442220	5443310	10	49.1401	123.791	442317	5443110	WRANGELLIA	Insular
PSM97-004	1653	14	14	U/Pb	Zircon	Detrital	A	Spot 42.1, 1% discordant	Mahoney, J.B., Mustard, P.S., Haggart, J.W., Friedman, R.M., Fanning, C.M. and McNicoll, V.J.	1999	1579	Australian National University, Canberra; M. Fanning	DeCourcy Formation, Nanaimo Group		Sedimentary	not reported	British Columbia	Vancouver	92G	4	16930	49.15	123.8	441662	5444439	10	49.1502	123.799	441759	5444239	WRANGELLIA	Insular
PSM97-004	1637	17	17	U/Pb	Zircon	Detrital	C	Spot 50.1, 21% discordant	Mahoney, J.B., Mustard, P.S., Haggart, J.W., Friedman, R.M., Fanning, C.M. and McNicoll, V.J.	1999	1579	Australian National University, Canberra; M. Fanning	DeCourcy Formation, Nanaimo Group		Sedimentary	not reported	British Columbia	Vancouver	92G	4	16938	49.15	123.8	441662	5444439	10	49.1502	123.799	441759	5444239	WRANGELLIA	Insular
PSM96-027	1625.4	2.7	2.7	U/Pb	Zircon	Detrital	B	Fraction A, 9.0% discordant	Mahoney, J.B., Mustard, P.S., Haggart, J.W., Friedman, R.M., Fanning, C.M. and McNicoll, V.J.	1999	1579	University of British Columbia; R. Friedman	Protection Formation, Nanaimo Group		Sedimentary	not reported	British Columbia	Vancouver	92G	4	16834	49.1721	123.92	432950	5447000	10	49.1723	123.919	433047	5446800	WRANGELLIA	Insular
PSM97-004	1604	10	10	U/Pb	Zircon	Detrital	A	Spot 24.1, -1% discordant	Mahoney, J.B., Mustard, P.S., Haggart, J.W., Friedman, R.M., Fanning, C.M. and McNicoll, V.J.	1999	1579	Australian National University, Canberra; M. Fanning	DeCourcy Formation, Nanaimo Group		Sedimentary	not reported	British Columbia	Vancouver	92G	4	16913	49.15	123.8	441662	5444439	10	49.1502	123.799	441759	5444239	WRANGELLIA	Insular
PSM97-004	1596	32	32	U/Pb	Zircon	Detrital	B	Spot 16.1, -6% discordant	Mahoney, J.B., Mustard, P.S., Haggart, J.W., Friedman, R.M., Fanning, C.M. and McNicoll, V.J.	1999	1579	Australian National University, Canberra; M. Fanning	DeCourcy Formation, Nanaimo Group		Sedimentary	not reported	British Columbia	Vancouver	92G	4	16905	49.15	123.8	441662	5444439	10	49.1502	123.799	441759	5444239	WRANGELLIA	Insular
PSM97-001	1593	38	38	U/Pb	Zircon	Detrital	C	Spot 10.1, 42% discordant	Mahoney, J.B., Mustard, P.S., Haggart, J.W., Friedman, R.M., Fanning, C.M. and McNicoll, V.J.	1999	1579	Australian National University, Canberra; M. Fanning	Protection Formation, Nanaimo Group		Sedimentary	not reported	British Columbia	Vancouver	92G	4	16948	49.1456	123.787	442634	5443941	10	49.1458	123.785	442731	5443741	WRANGELLIA	Insular
PSM97-001	1564	25	25	U/Pb	Zircon	Detrital	C	Spot 33.1, 23% discordant	Mahoney, J.B., Mustard, P.S., Haggart, J.W., Friedman, R.M., Fanning, C.M. and McNicoll, V.J.	1999	1579	Australian National University, Canberra; M. Fanning	Protection Formation, Nanaimo Group		Sedimentary	not reported	British Columbia	Vancouver	92G	4	16972	49.1456	123.787	442634	5443941	10	49.1458	123.785	442731	5443741	WRANGELLIA	Insular
PSM97-004	1519	11	11	U/Pb	Zircon	Detrital	B	Spot 26.1, 12% discordant	Mahoney, J.B., Mustard, P.S., Haggart, J.W., Friedman, R.M., Fanning, C.M. and McNicoll, V.J.	1999	1579	Australian National University, Canberra; M. Fanning	DeCourcy Formation, Nanaimo Group		Sedimentary	not reported	British Columbia	Vancouver	92G	4	16915	49.15	123.8	441662	5444439	10	49.1502	123.799	441759	5444239	WRANGELLIA	Insular
PSM97-004	1482	30	30	U/Pb	Zircon	Detrital	C	Spot 3.1, 22% discordant	Mahoney, J.B., Mustard, P.S., Haggart, J.W., Friedman, R.M., Fanning, C.M. and McNicoll, V.J.	1999	1579	Australian National University, Canberra; M. Fanning	DeCourcy Formation, Nanaimo Group		Sedimentary	not reported	British Columbia	Vancouver	92G	4	16892	49.15	123.8	441662	5444439	10	49.1502	123.799	441759	5444239	WRANGELLIA	Insular
PSM97-001	1461	43	43	U/Pb	Zircon	Detrital	B	Spot 49.1, 6% discordant	Mahoney, J.B., Mustard, P.S., Haggart, J.W., Friedman, R.M., Fanning, C.M. and McNicoll, V.J.	1999	1579	Australian National University, Canberra; M. Fanning	Protection Formation, Nanaimo Group		Sedimentary	not reported	British Columbia	Vancouver	92G	4	16988	49.1456	123.787	442634	5443941	10	49.1458	123.785	442731	5443741	WRANGELLIA	Insular
PSM97-001	1459	17	17	U/Pb	Zircon	Detrital	B	Spot 35.1, 8% discordant	Mahoney, J.B., Mustard, P.S., Haggart, J.W., Friedman, R.M., Fanning, C.M. and McNicoll, V.J.	1999	1579	Australian National University, Canberra; M. Fanning	Protection Formation, Nanaimo Group		Sedimentary	not reported	British Columbia	Vancouver	92G	4	16974	49.1456	123.787	442634	5443941	10	49.1458	123.785	442731	5443741	WRANGELLIA	Insular
MVM-90-61	1458.9	5	5	U/Pb	Zircon	Detrital	C	Fraction L , 79.88% discordant. Age is 207Pb/206Pb age.	Mustard, P.S., Parrish, R.R. and McNicoll, V.	1995	1519	Geological Survey of Canada (Ottawa); R. Parrish and V. McNicoll	Gabriola Formation, Nanaimo Group		Sedimentary	from base of a massive coarse-grained thick bed of arkosic arenite within a succession of sandstone turbidites and minor mudstone	British Columbia	Vancouver	92G	4	16132	49.1999	123.816	440550	5450000	10	49.2001	123.815	440647	5449800	WRANGELLIA	Insular
PSM97-001	1444	24	24	U/Pb	Zircon	Detrital	B	Spot 6.1, 6% discordant	Mahoney, J.B., Mustard, P.S., Haggart, J.W., Friedman, R.M., Fanning, C.M. and McNicoll, V.J.	1999	1579	Australian National University, Canberra; M. Fanning	Protection Formation, Nanaimo Group		Sedimentary	not reported	British Columbia	Vancouver	92G	4	16944	49.1456	123.787	442634	5443941	10	49.1458	123.785	442731	5443741	WRANGELLIA	Insular
PSM97-004	1426	11	11	U/Pb	Zircon	Detrital	B	Spot 41.1, 11% discordant	Mahoney, J.B., Mustard, P.S., Haggart, J.W., Friedman, R.M., Fanning, C.M. and McNicoll, V.J.	1999	1579	Australian National University, Canberra; M. Fanning	DeCourcy Formation, Nanaimo Group		Sedimentary	not reported	British Columbia	Vancouver	92G	4	16929	49.15	123.8	441662	5444439	10	49.1502	123.799	441759	5444239	WRANGELLIA	Insular
PSM97-001	1421	11	11	U/Pb	Zircon	Detrital	B	Spot 17.1, 10% discordant	Mahoney, J.B., Mustard, P.S., Haggart, J.W., Friedman, R.M., Fanning, C.M. and McNicoll, V.J.	1999	1579	Australian National University, Canberra; M. Fanning	Protection Formation, Nanaimo Group		Sedimentary	not reported	British Columbia	Vancouver	92G	4	16955	49.1456	123.787	442634	5443941	10	49.1458	123.785	442731	5443741	WRANGELLIA	Insular
MVM-90-61	1414.3	11	11	U/Pb	Zircon	Detrital	C	Fraction J , 81.38% discordant. Age is 207Pb/206Pb age.	Mustard, P.S., Parrish, R.R. and McNicoll, V.	1995	1519	Geological Survey of Canada (Ottawa); R. Parrish and V. McNicoll	Gabriola Formation, Nanaimo Group		Sedimentary	from base of a massive coarse-grained thick bed of arkosic arenite within a succession of sandstone turbidites and minor mudstone	British Columbia	Vancouver	92G	4	16130	49.1999	123.816	440550	5450000	10	49.2001	123.815	440647	5449800	WRANGELLIA	Insular
PSM97-004	1393	15	15	U/Pb	Zircon	Detrital	A	Spot 32.1, -1 %discordant	Mahoney, J.B., Mustard, P.S., Haggart, J.W., Friedman, R.M., Fanning, C.M. and McNicoll, V.J.	1999	1579	Australian National University, Canberra; M. Fanning	DeCourcy Formation, Nanaimo Group		Sedimentary	not reported	British Columbia	Vancouver	92G	4	16920	49.15	123.8	441662	5444439	10	49.1502	123.799	441759	5444239	WRANGELLIA	Insular
PSM97-004	1385	6	6	U/Pb	Zircon	Detrital	A	Spot 12.1, -2% discordant	Mahoney, J.B., Mustard, P.S., Haggart, J.W., Friedman, R.M., Fanning, C.M. and McNicoll, V.J.	1999	1579	Australian National University, Canberra; M. Fanning	DeCourcy Formation, Nanaimo Group		Sedimentary	not reported	British Columbia	Vancouver	92G	4	16901	49.15	123.8	441662	5444439	10	49.1502	123.799	441759	5444239	WRANGELLIA	Insular
PSM97-001	1358	14	14	U/Pb	Zircon	Detrital	C	Spot 48.1, 26% discordant	Mahoney, J.B., Mustard, P.S., Haggart, J.W., Friedman, R.M., Fanning, C.M. and McNicoll, V.J.	1999	1579	Australian National University, Canberra; M. Fanning	Protection Formation, Nanaimo Group		Sedimentary	not reported	British Columbia	Vancouver	92G	4	16987	49.1456	123.787	442634	5443941	10	49.1458	123.785	442731	5443741	WRANGELLIA	Insular
PSM97-004	1345	12	12	U/Pb	Zircon	Detrital	B	Spot 47.1, 8% discordant	Mahoney, J.B., Mustard, P.S., Haggart, J.W., Friedman, R.M., Fanning, C.M. and McNicoll, V.J.	1999	1579	Australian National University, Canberra; M. Fanning	DeCourcy Formation, Nanaimo Group		Sedimentary	not reported	British Columbia	Vancouver	92G	4	16935	49.15	123.8	441662	5444439	10	49.1502	123.799	441759	5444239	WRANGELLIA	Insular
PSM97-004	1344	28	28	U/Pb	Zircon	Detrital	A	Spot 33.1, -2% discordant	Mahoney, J.B., Mustard, P.S., Haggart, J.W., Friedman, R.M., Fanning, C.M. and McNicoll, V.J.	1999	1579	Australian National University, Canberra; M. Fanning	DeCourcy Formation, Nanaimo Group		Sedimentary	not reported	British Columbia	Vancouver	92G	4	16921	49.15	123.8	441662	5444439	10	49.1502	123.799	441759	5444239	WRANGELLIA	Insular
PSM97-001	1331	9	9	U/Pb	Zircon	Detrital	C	Spot 47.1, 22% discordant	Mahoney, J.B., Mustard, P.S., Haggart, J.W., Friedman, R.M., Fanning, C.M. and McNicoll, V.J.	1999	1579	Australian National University, Canberra; M. Fanning	Protection Formation, Nanaimo Group		Sedimentary	not reported	British Columbia	Vancouver	92G	4	16986	49.1456	123.787	442634	5443941	10	49.1458	123.785	442731	5443741	WRANGELLIA	Insular
PSM96-029	1119.1	4.3	4.3	U/Pb	Zircon	Detrital	B	Fraction C, 11.0% discordant	Mahoney, J.B., Mustard, P.S., Haggart, J.W., Friedman, R.M., Fanning, C.M. and McNicoll, V.J.	1999	1579	University of British Columbia; R. Friedman	Geoffrey Formation, Nanaimo Group		Sedimentary	not reported	British Columbia	Vancouver	92G	4	16822	49.1399	123.792	442220	5443310	10	49.1401	123.791	442317	5443110	WRANGELLIA	Insular
PSM97-001	1117	22	22	U/Pb	Zircon	Detrital	C	Spot 36.1, 26% discordant	Mahoney, J.B., Mustard, P.S., Haggart, J.W., Friedman, R.M., Fanning, C.M. and McNicoll, V.J.	1999	1579	Australian National University, Canberra; M. Fanning	Protection Formation, Nanaimo Group		Sedimentary	not reported	British Columbia	Vancouver	92G	4	16975	49.1456	123.787	442634	5443941	10	49.1458	123.785	442731	5443741	WRANGELLIA	Insular
PSM97-004	624	10	10	U/Pb	Zircon	Detrital	B	Spot 22.1, %discordance not reported, no plot, no data for other ages (cannot assess relative concordance). Age is 206Pb/238U age	Mahoney, J.B., Mustard, P.S., Haggart, J.W., Friedman, R.M., Fanning, C.M. and McNicoll, V.J.	1999	1579	Australian National University, Canberra; M. Fanning	DeCourcy Formation, Nanaimo Group		Sedimentary	not reported	British Columbia	Vancouver	92G	4	16911	49.15	123.8	441662	5444439	10	49.1502	123.799	441759	5444239	WRANGELLIA	Insular
4124A1	422	20	20	K/Ar	Whole rock	Igneous cooling age	B	K/Ar whole-rock method unreliable. Age reported as 414 Ma; recalibrated herein to IUGS standards using table in Dalrymple (1979)	Young, I.F.	1981	1145	Shell Development Corporation, Houston, Texas	Near base of 97 + m of plutonic rock		Plutonic	Microgabbro, except A3: Granite(?)	British Columbia	Hecate Strait	103G	6	12129	53.3149	131.341	344051	5909860	9	53.3152	131.339	344159	5909666	WRANGELLIA	Insular
not reported4	421	18	18	K/Ar	Biotite	Geological Error	C		Campbell, S.W.	1981	5			Vancouver Island	Plutonic	Gabbro phlogopitic biotite from mineralized gabbro-ultramafic complex at Wellgreen Ni-Cu-PGM mine	Yukon	Kluane Lake	115G	5	699	61.463	139.504	579744	6815276	7	61.4633	139.502	579854	6815111	WRANGELLIA
Sicker 3	421	36	36	K/Ar	Hornblende	Cooling 500°C	B	UBC lab sheets note excess-Ar likely. Very low K2O (0.079%)	Armstrong, R.L. and Shore, P.J.	0	1419	University of British Columbia, J. Harakal	Sicker Group;	Vancouver Island	Volcanic	hornblende porphyry; pyroxene crystal tuff;	British Columbia	Victoria	92B	13	15459	48.8548	123.72	447209	5411566	10	48.855	123.718	447305	5411367	WRANGELLIA	Insular
MEZ 77-1	393	25	10	U/Pb	Zircon	Igneous crystallization age	A	5 discordant co-linear fractions, age is upper intercept. Lower intercept unconstrained within error (92 +120/-130 Ma); no meaning attached	Brandon, M.T., Orchard, M.J., Parrish, R.R., Sutherland Brown, A. and Yorath, C.J.	1986	1454	Geological Survey of Canada (Ottawa); R. Parrish	Tyee Formation, Sicker Group; Island Intrusions	Central-Southern Vancouver Island	Plutonic	meta quartz porphyry	British Columbia	Victoria	92B	13	15965	48.834	123.555	459296	5409150	10	48.8342	123.553	459392	5408950	WRANGELLIA	Insular
PSM97-001	390	7	7	U/Pb	Zircon	Detrital	B	Spot 21.1, %discordance not reported, no plot, no data for other ages (cannot assess relative concordance). Age is 206Pb/238U age	Mahoney, J.B., Mustard, P.S., Haggart, J.W., Friedman, R.M., Fanning, C.M. and McNicoll, V.J.	1999	1579	Australian National University, Canberra; M. Fanning	Protection Formation, Nanaimo Group	Vancouver Island	Sedimentary	not reported	British Columbia	Vancouver	92G	4	16959	49.1456	123.787	442634	5443941	10	49.1458	123.785	442731	5443741	WRANGELLIA	Insular
UD-Zr	374	7	7	U/Pb	Zircon	Minimum age estimate	B	Single discordant fraction; age is Pb/Pb age, which provides a minimum constraint only.	Juras, S.J.	1987	1325	University of British Columbia; J. Mortensen	Upper Dacite unit, Myra Formation	Central-Southern Vancouver Island	Volcanic	feldspar porph. andesite flow, greenschist grade;	British Columbia	Alberni	92F	12	15953	49.5598	125.571	314045	5492867	10	49.56	125.57	314144	5492666	WRANGELLIA	Insular
UR-Zr	370	18	6	U/Pb	Zircon	Igneous crystallization age	A	5 fractions (2 abraded), slightly discordant, colinear. Age is upper intercept; lower intercept at 139 Ma.	Juras, S.J.	1987	1325	University of British Columbia; J. Mortensen	Sicker Group, Myra Formation, Upper Rhyolite;	Central-Southern Vancouver Island	Volcanic	rhyolite, feldspar qtz (& amphib) crystal - felsic cognate lithic - lithic (qtz fsp porph. rhy) tuff	British Columbia	Alberni	92F	12	15954	49.5598	125.571	314045	5492867	10	49.56	125.57	314144	5492666	WRANGELLIA	Insular
MEZ 76-3	370	9	13	U/Pb	Zircon	Minimum age estimate	B	5 fractions, discordant non-linear array. Age is range of Pb-Pb dates, which provides poorly constrained minimum age.	Brandon, M.T., Orchard, M.J., Parrish, R.R., Sutherland Brown, A. and Yorath, C.J.	1986	1454	Geological Survey of Canada (Ottawa); R. Parrish	Tyee Formation, Sicker Group; Island Intrusions	Central-Southern Vancouver Island	Plutonic	metagranodiorite;	British Columbia	Victoria	92B	14	15964	48.7815	123.445	467335	5403261	10	48.7817	123.443	467431	5403061	WRANGELLIA	Insular
WN-19-74	370	9	9	U/Pb	Zircon	Minimum age	B	4 discordant non-linear fractions; age is lower constraint provided by Pb-Pb ages (range: 361 - 395 Ma)	Brandon, M.T., Orchard, M.J., Parrish, R.R., Sutherland Brown, A. and Yorath, C.J.	1986	1454	Geological Survey of Canada (Ottawa); R. Parrish	Tyee quartz porphyry, sills and dykes;	Central-Southern Vancouver Island	Plutonic	schistose meta quartz porphyry	British Columbia	Victoria	92B	13	15094	48.8235	123.594	456376	5408003	10	48.8237	123.593	456472	5407804	WRANGELLIA	Insular
02-CS-16	369.4	1.7	1.7	U/Pb	Zircon	Igneous crystallization age	A	5 fractions, concordant to near-concordant, non-overlapping (minor Pb-loss). Age is range of U-Pb ages for the three concordant fractions.	Sluggett, C.L.	2003	1542	University of British Columbia; C. Sluggett and J. Mortensen	Saltspring Intrusive Suite, Sicker Group	Central-Southern Vancouver Island	Plutonic	quartz-feldspar porphyry	British Columbia	Victoria	92B	13	16418	48.7947	123.513	462318	5404759	10	48.7949	123.512	462414	5404560	WRANGELLIA	Insular
84925-1	367	2	2	U/Pb	Zircon	Crystallization estimate	A	4 fractions, clustered and overlapping just below concordia. Age is mean 207Pb/206Pb age of all fractions.	Parrish, R.R. and McNicoll, V.J.	1992	1456	Geological Survey of Canada (Ottawa); R. Parrish and V. McNicoll	Saltspring Intrusion	Central-Southern Vancouver Island	Plutonic	quartz-feldspar porphyry	British Columbia	Victoria	92B	14	16044	48.7748	123.372	472678	5402491	10	48.775	123.371	472774	5402291	WRANGELLIA	Insular
P13-307	366	4	4	U/Pb	Zircon	Minimum age estimate	A	5 lightly abraded slightly discordant fractions, quasi-linear array, display minor Pb-loss. Age is mean Pb-Pb age, which provides minimum age.	Parrish, R.R. and McNicoll, V.J.	1992	1456	Geological Survey of Canada (Ottawa); R. Parrish	Sicker Rhyolite	Central-Southern Vancouver Island	Volcanic	quartz feldspar porphyritic rhyolite	British Columbia	Alberni	92F	12	15976	49.5706	125.59	312725	5494118	10	49.5708	125.589	312824	5493917	WRANGELLIA	Insular
02-CS-07	365.5	1.7	1.7	U/Pb	Zircon	Crystallization estimate	A	5 fractions, one concordant, rest discordant, clustered (not colinear) between 356 - 365 Ma. Minor variable Pb-loss and/or inheritance. Age is based on single concordant fraction C.	Sluggett, C.L.	2003	1542	University of British Columbia; C. Sluggett and J. Mortensen	Saltspring Intrusive Suite, Sicker Group	Central-Southern Vancouver Island	Plutonic	quartz-feldspar porphyry	British Columbia	Victoria	92B	14	16417	48.7821	123.445	467293	5403326	10	48.7823	123.444	467389	5403127	WRANGELLIA	Insular
lMyra_ste	365	52	52	Rb/Sr	Whole rock	Igneous cooling age	B	4 samples from single horizon in the sequence; valid w.r.t. sampling; MSWD not reported (true isochron?)	Juras, S.J.	1987	1325	University of British Columbia	H-W Horizon, Myra Formation, Sicker Group	Vancouver Island	Volcanic	4 samples, 3 rhyolites, 1 basalt	British Columbia	Alberni	92F	12	16376	49.5698	125.581	313360	5494003	10	49.57	125.58	313459	5493802	WRANGELLIA	Insular
HFB-95-31	365	4	4	U/Pb	Zircon	Detrital	A	Fraction C4 , 0% discordant. Age is 206Pb/238U age.	Mahoney, J.B., Mustard, P.S., Haggart, J.W., Friedman, R.M., Fanning, C.M. and McNicoll, V.J.	1999	1579	Geological Survey of Canada, V. McNicoll	Haida Formation, Queen Charlotte basin	Queen Charlotte Islands	Sedimentary	not reported	British Columbia	Hecate Strait	103G	4	16815	53.2374	131.872	308325	5902525	9	53.2376	131.871	308434	5902330	WRANGELLIA	Insular
E80-24	363	26	26	K/Ar	Hornblende	Cooling 500°C	A	No analytical data in report; UBC lab sheet indicates hbl was of excellent quality	Eastwood, G.P.E.	1983	1467	University of British Columbia, J. Harakal	mafic intrusive; dyke, prekinematic;	Vancouver Island	Volcanic	shonkinite	British Columbia	Victoria	92B	13	15804	48.8615	123.675	450516	5412278	10	48.8617	123.673	450613	5412078	WRANGELLIA	Insular
85225-2	362	2	2	U/Pb	Zircon	Igneous crystallization age	A	4 fractions, concordant and overlapping. Age is range of U-Pb ages and errors for all fractions.	Parrish, R.R. and McNicoll, V.J.	1992	1456	Geological Survey of Canada (Ottawa); R. Parrish and V. McNicoll	Saltspring Intrusion	Central-Southern Vancouver Island	Plutonic	quartz-feldspar porphyry	British Columbia	Victoria	92B	13	16045	48.8604	123.715	447541	5412181	10	48.8606	123.714	447637	5411981	WRANGELLIA	Insular
02-CS-06	358.5	0.9	0.9	U/Pb	Zircon	Crystallization estimate	A	5 fractions, one concordant, rest discordant, clustered (not colinear) between 354 - 360 Ma. Minor variable Pb-loss and/or inheritance. Age is based on single concordant fraction E.	Sluggett, C.L.	2003	1542	University of British Columbia; C. Sluggett and J. Mortensen	Saltspring Intrusive Suite, Sicker Group	Central-Southern Vancouver Island	Plutonic	quartz-feldspar porphyry	British Columbia	Victoria	92B	13	16416	48.8514	123.567	458371	5411094	10	48.8516	123.566	458467	5410894	WRANGELLIA	Insular
HFB-95-31	358	13	13	U/Pb	Zircon	Detrital	A	Fraction C3 , -4.37% discordant. Age is 206Pb/238U age.	Mahoney, J.B., Mustard, P.S., Haggart, J.W., Friedman, R.M., Fanning, C.M. and McNicoll, V.J.	1999	1579	Geological Survey of Canada, V. McNicoll	Haida Formation, Queen Charlotte basin	Queen Charlotte Islands	Sedimentary	not reported	British Columbia	Hecate Strait	103G	4	16814	53.2374	131.872	308325	5902525	9	53.2376	131.871	308434	5902330	WRANGELLIA	Insular
02-CS-01	354	1.2	1.2	U/Pb	Zircon	Igneous crystallization age	A	5 fractions, concordant to discordant, clustered. Age is mean age of overlapping concordant (within error) fractions A and E.	Sluggett, C.L.	2003	1542	University of British Columbia; C. Sluggett and J. Mortensen	McLaughlin Ridge Formation, Sicker Group	Central-Southern Vancouver Island	Volcanic	felsic tuff	British Columbia	Victoria	92B	11	16415	48.7328	123.438	467768	5397842	10	48.7329	123.437	467864	5397643	WRANGELLIA	Insular
10825	336.8	7.1	7.1	Ar/Ar	Hornblende	Cooling 500°C	B	Excess Ar gives age older than true age; Saddle	Bittenbender, P.E., Bean, K.W., Kurtak, J. M.and Deininger, J., Jr.	2007	2001	University of Alaska, Fairbanks; P. Layer, J. Drake		Alaska Range	Plutonic	Lherzolite	Alaska										63.2899	-145.422
SBT-Zr	320	7	7	U/Pb	Zircon	Minimum age estimate	B	2 size fractions of multible grains, both discordant. Age is minimum Pb/Pb age; the other fraction has Pb/Pb age of 419 ±33 Ma. Zircons may represent multiple sources.	Juras, S.J.	1987	1325	University of British Columbia; J. Mortensen	Sicker Group, Thelwood Formation, pyroclastic member	Central-Southern Vancouver Island	Volcanic	feldspar xl-lithic (andesite flow clasts) - felsic cognate lithic lapilli tuff, welded;	British Columbia	Alberni	92F	12	15952	49.5598	125.571	314045	5492867	10	49.56	125.57	314144	5492666	WRANGELLIA	Insular
MVM-90-101	319.8	1.1	1.1	U/Pb	Zircon	Detrital	A	Fraction F , -0.19% discordant (between U-Pb ages). Age is 206Pb/238U age.	Mustard, P.S., Parrish, R.R. and McNicoll, V.	1995	1519	Geological Survey of Canada (Ottawa); R. Parrish and V. McNicoll	Extension Formation, Nanaimo Group	Central-Southern Vancouver Island	Sedimentary	basal pebble conglomerate, chert and volcanic clasts abundant in a coarse-grained lithic wacke matrix	British Columbia	Vancouver	92G	4	16114	49.1356	123.938	431550	5442950	10	49.1357	123.937	431647	5442750	WRANGELLIA	Insular
PSM97-001	315	7	7	U/Pb	Zircon	Detrital	B	Spot 31.1, %discordance not reported, no plot, no data for other ages (cannot assess relative concordance). Age is 206Pb/238U age	Mahoney, J.B., Mustard, P.S., Haggart, J.W., Friedman, R.M., Fanning, C.M. and McNicoll, V.J.	1999	1579	Australian National University, Canberra; M. Fanning	Protection Formation, Nanaimo Group	Central-Southern Vancouver Island	Sedimentary	not reported	British Columbia	Vancouver	92G	4	16970	49.1456	123.787	442634	5443941	10	49.1458	123.785	442731	5443741	WRANGELLIA	Insular
02-CS-13	314.6	1.5	1.5	U/Pb	Zircon	Maximum age	B	2 fractions, concordant to near-concordant. Age is based on single concordant fraction.	Sluggett, C.L.	2003	1542	University of British Columbia; C. Sluggett and J. Mortensen	Fourth Lake Formation, Buttle Lake Group	Central-Southern Vancouver Island	Sedimentary	tuffaceous sandstone	British Columbia	Victoria	92B	11	16419	48.7359	123.484	464390	5398207	10	48.736	123.483	464486	5398008	WRANGELLIA	Insular
87APR21	312	9	9	K/Ar	Hornblende	Cooling 500°C	A	4 fractions	Gardner M. C., Bergman S. C., Cushing G. W., E. M. MacKevett J., Plafker G., Campbell R. B., Dodds C. J., McClelland W. C. & Mueller P. A.	1988	2011	D.L. Turner, Univ. of Alaska Geochonology Laboratory	Penn-Permian monzonite and syenite	Wrangell Mtns	Plutonic		Alaska										61.07	141.45
84ANK69A	310	29	29	U/Pb	Zircon	Igneous crystallization age	A		Plafker G., Nokleberg W. J. & Lull J. S.	1989	2008	USGS, Aleinikoff	Southern Wrangellia terrane margin	Wrangell Mtns	Metamorphic	Metagranodiorite	Alaska										61.59.52	144.31.15			WRANGELLIA
84ANK186A	309	11	11	U/Pb	Zircon	Igneous crystallization age	A		Plafker G., Nokleberg W. J. & Lull J. S.	1989	2008	USGS, Aleinikoff	Haley Creek metamorphic	Wrangell Mtns	Metamorphic	Metagranodiorite	Alaska										61.23.46	145.00.45			WRANGELLIA
78ANK211A	309	2	2	U/Pb	Zircon	Igneous crystallization age	A		Nokleberg W. J., Aleinikoff J. N., Dutro J. T. J., Lanphere M. A., Silberling N. J., Silva S. R., Smith T. E. & Turner D. L.	1992	2010			Alaska Range	Plutonic	granite	Alaska										63.01.22	144.56.28			WRANGELLIA
85Wr2101	309	5	5	U/Pb	Zircon	Igneous crystallization age	A	4 fractions	Gardner M. C., Bergman S. C., Cushing G. W., E. M. MacKevett J., Plafker G., Campbell R. B., Dodds C. J., McClelland W. C. & Mueller P. A.	1988	2011	University of Florida	Penn-Permian monzonite and syenite	Wrangell Mtns	Plutonic		Alaska										61.07	141.45
87APR25A	307	2	2	U/Pb	Zircon	Igneous crystallization age	A		Plafker G., Nokleberg W. J. & Lull J. S.	1989	2008	USGS, Aleinikoff	Southern Wrangellia terrane margin	Wrangell Mtns	Metamorphic	pyroxene-bearing monzonite	Alaska										61.22.00	143.25.35			WRANGELLIA
EM3	297	9	9	K/Ar	Hornblende	Cooling 500°C	A		MacKevett E. M., Jr.	1978	2009		Penn-Permian monzonite and syenite	Wrangell Mtns	Plutonic		Alaska
EM2	295	8	8	K/Ar	Hornblende	Cooling 500°C	A		MacKevett E. M., Jr.	1978	2009		Penn-Permian monzonite and syenite	Wrangell Mtns	Plutonic		Alaska
85Wr2101	294	12	12	K/Ar	Hornblende	Cooling 500°C	A	4 fractions	Gardner M. C., Bergman S. C., Cushing G. W., E. M. MacKevett J., Plafker G., Campbell R. B., Dodds C. J., McClelland W. C. & Mueller P. A.	1988	2011	Krueger Enterprises, Cambridge, MA	Penn-Permian monzonite and syenite	Wrangell Mtns	Plutonic		Alaska										61.07	141.45
85Wr63b	289	11	11	K/Ar	Hornblende	Cooling 500°C	A	4 fractions	Gardner M. C., Bergman S. C., Cushing G. W., E. M. MacKevett J., Plafker G., Campbell R. B., Dodds C. J., McClelland W. C. & Mueller P. A.	1988	2011	Krueger Enterprises, Cambridge, MA	Penn-Permian monzonite and syenite	Wrangell Mtns	Plutonic		Alaska										61.07	141.45
E80-77	288	28	28	K/Ar	Hornblende	Cooling 500°C	A		Eastwood, G.P.E. and Armstrong, R.L.	0	1576	University of British Columbia, J. Harakal	Sicker Group, volcanic division;	Vancouver Island	Volcanic	feldspar hornblende porphyritic trachyte; pyroxene crystal tuff;	British Columbia	Victoria	92B	13	15469	48.8481	123.686	449648	5410802	10	48.8483	123.685	449744	5410603	WRANGELLIA	Insular
EM1	285			K/Ar	Biotite	Cooling 280°C	A		MacKevett E. M., Jr.	1978	2009		Penn-Permian monzonite and syenite	Wrangell Mtns	Plutonic		Alaska
73AMK60c	279	10	10	K/Ar	Hornblende	Cooling 500°C	A	4 fractions	Gardner M. C., Bergman S. C., Cushing G. W., E. M. MacKevett J., Plafker G., Campbell R. B., Dodds C. J., McClelland W. C. & Mueller P. A.	1988	2011	MacKevett E. M., Jr. (1978)	Penn-Permian monzonite and syenite	Wrangell Mtns	Plutonic		Alaska										61.07	141.45
4124B	270.8	22	22	K/Ar	Whole rock	Igneous cooling age	B	K/Ar whole-rock method unreliable. Age reported as 265 Ma; recalibrated herein to IUGS standards using table in Dalrymple (1979)	Young, I.F.	1981	1145	Shell Development Corporation, Houston, Texas	Near base of 97 + m of plutonic rock	Vancouver Island	Plutonic	Microgabbro, except A3: Granite(?)	British Columbia	Hecate Strait	103G	6	12132	53.3149	131.341	344051	5909860	9	53.3152	131.339	344159	5909666	WRANGELLIA	Insular
4124A2	267	20	20	K/Ar	Whole rock	Igneous cooling age	B	K/Ar whole-rock method unreliable. Age reported as 260 Ma; recalibrated herein to IUGS decay constants	Young, I.F.	1981	1145	Shell Development Corporation, Houston, Texas	Near base of 97 + m of plutonic rock	Vancouver Island	Plutonic	Microgabbro, except A3: Granite(?)	British Columbia	Hecate Strait	103G	6	12130	53.3149	131.341	344051	5909860	9	53.3152	131.339	344159	5909666	WRANGELLIA	Insular
Mt Benton_ste	257.5	27.5	27.5	Rb/Sr	Whole rock	Igneous cooling age	B	12 samples in suite, seems to be a visually-fit 'isochron'. Reported as upper-lower limit range (converted to median- +/-error herein). MSWD and error not reported.	Holbek, P.M.	1980	1532	University of British Columbia	Myra Formation, Sicker Group	Vancouver Island	Volcanic	12 samples ranging from rhyolite to andesite and amphibolite	British Columbia	Victoria	92B	13	16373	48.8998	123.85	437714	5416662	10	48.9	123.849	437810	5416462	WRANGELLIA	Insular
28SM	257	20	20	K/Ar	Amphibole	Cooling 500°C	A	Earlier version of thesis showed date as 307±14 Ma (1 sigma); revised to 249 by R. Armstrong on UBC copy, then recalibrated to IUGS decay constants herein. Hbl variety = actinolite	Mainala, S.M.	1975	1312	University of British Columbia, J. Harakal	Sicker Group	Vancouver Island	Volcanic	metavolcanic-greenschist, uralite porphyry;pyroxene crystal tuff	British Columbia	Victoria	92B	14	15422	48.7682	123.378	472225	5401752	10	48.7683	123.377	472321	5401552	WRANGELLIA	Insular
4124E	250.4	14	14	K/Ar	Whole rock	Igneous cooling age	B	K/Ar whole-rock method unreliable. Age reported as 245 Ma; recalibrated herein to IUGS standards using table in Dalrymple (1979)	Young, I.F.	1981	1145	Shell Development Corporation, Houston, Texas	Near base of 97 + m of plutonic rock	Vancouver Island	Plutonic	Microgabbro, except A3: Granite(?)	British Columbia	Hecate Strait	103G	6	12134	53.3149	131.341	344051	5909860	9	53.3152	131.339	344159	5909666	WRANGELLIA	Insular
03JS07E	241.4	2	2	Ar/Ar	Whole rock	Igneous cooling age	A	Minimum magmatic age	Bittenbender, P.E., Bean, K.W., Kurtak, J. M.and Deininger, J., Jr.	2007	2001	University of Alaska, Fairbanks; P. Layer, J. Drake		Alaska Range	Volcanic	Mafic tuff, hand sample heterogeneous and very altered	Alaska										63.309	-145.623
PSM97-004	238	3	3	U/Pb	Zircon	Detrital	B	Spot 28.1, %discordance not reported, no plot, no data for other ages (cannot assess relative concordance). Age is 206Pb/238U age	Mahoney, J.B., Mustard, P.S., Haggart, J.W., Friedman, R.M., Fanning, C.M. and McNicoll, V.J.	1999	1579	Australian National University, Canberra; M. Fanning	DeCourcy Formation, Nanaimo Group	Vancouver Island	Sedimentary	not reported	British Columbia	Vancouver	92G	4	16917	49.15	123.8	441662	5444439	10	49.1502	123.799	441759	5444239	WRANGELLIA	Insular
92LNG-42	232.8	11.5	11.5	Ar/Ar	Whole rock	Cooling <200°C	B	40Ar/39Ar step-heating technique;Isochron age: 230.5 ± 27.8; 57%39Ar released; n=4/7	Lassiter	1995	2015	R. Duncan, Oregon State Univ.	Nikolai Formation	Wrangell Mtns	Volcanic	Nikolai basalt flow, ~100m above the base of the basalt stratigraphy; Skoali Creek	Alaska
92LNG-47	232.4	11.9	11.9	Ar/Ar	Whole rock	Cooling <200°C	B	40Ar/39Ar step-heating technique; Isochron age: 228.1 ± 11.8; 69%39Ar released; n=5/7	Lassiter	1995	2015	R. Duncan, Oregon State Univ.	Nikolai Formation	Wrangell Mtns	Volcanic	Nikolai basalt flow, from the lower part of the basalt stratigraphy; Skoali Creek	Alaska
HDB-88-TAT-22	232.2	1	1	U/Pb	Zircon	Igneous Crystallization Age	A	The concordia plot was subsequently published in GSC Bulletin 506 (1997), Hulbert	Mortensen, J.K. and Hulbert, L.	1992	71	Geological Survey of Canada (Ottawa)	Maple Creek gabbro, Kluane Ultramafic Belt	Yukon	Plutonic	Gabbro sill of Maple Creek gabbro	Yukon	Kluane Lake	115G	6	802	61.3913	139.352	588028	6807490	7	61.3917	139.35	588138	6807325	WRANGELLIA
JSchmidt_1	231.1	11	11	Ar/Ar	Hornblende	Cooling 500°C	A	Magmatic age	Schmidt J. M. & Rogers R. K.	2004	2012	L. Snee, USGS		Alaska Range	Plutonic	gabbro	Alaska
Bittenbender 1	230.4	2.3	2.3	Ar/Ar	Biotite	Cooling 280°C	A	Magmatic age	Bittenbender, P.E., Bean, and Gensler E. G.	2003	2003	University of Alaska, Fairbanks; P. Layer, J. Drake		Alaska Range	Plutonic	altered gabbro	Alaska
AT-87-19-1	230	13	13	K/Ar	Hornblende	Cooling 500°C	A		Hunt, P.A. and Roddick, J.C.	1991	32	Geological Survey of Canada (Ottawa); Lab ID 90-24, K-Ar# 3976	Carpenter Lake dyke swarm	Vancouver Island	Volcanic	hornblende (clinopyroxene)-plagioclase porphyry dyke	British Columbia	Moresby Island	103B	2	11777	52.2186	131.004	363092	5787249	9	52.16	131	363200	5787050	WRANGELLIA	Insular
02-CS-14	228.4	2.5	2.5	U/Pb	Zircon	Igneous crystallization age	A	206Pb/238U age for 2 concordant fractions yielded ages of 229.4 ± 2.5, and 228.4 ± 1.6.	Sluggett, C.L.	2003	1542	University of British Columbia; C. Sluggett and J. Mortensen	Mount Tuam Gabbro	Central-Southern Vancouver Island	Plutonic	gabbro sill	British Columbia	Victoria	92B	11	16421	48.7287	123.485	464298	5397408	10	48.7289	123.484	464394	5397209	WRANGELLIA	Insular
AK25515	228.3	2.2	2.2	Ar/Ar	Biotite	Cooling 280°C	A	Plateau age, 5 fractions, 81% 39Ar released, Integrated age: 226.0 ± 1.1; Interpreted as age of magmatism.	Bittenbender, P.E., Bean, K.W., Kurtak, J. M.and Deininger, J., Jr.	2007	2001	University of Alaska, Fairbanks; P. Layer, J. Drake	Rainy Creek Complex	Alaska Range	Gabbro	Described as a biotite-rich, pyroxene-plagioclase cumulate with poikilitic biotite including olivine	Alaska										63.3047	145.833
92LNG-19	228.3	5.2	5.2	Ar/Ar	Whole rock	Cooling <200°C	B	40Ar/39Ar step-heating technique; Isochron age: 224.8 ± 5.2; 58%39Ar released; n=5/7	Lassiter	1995	2015	R. Duncan, Oregon State Univ.	Nikolai Formation	Wrangell Mtns	Volcanic	Nikolai basalt flow from the upper third of the volcanic stratigraphy; Glacier Creek	Alaska
05SI-75-1	227.5	2.4	2.4	Ar/Ar	Biotite	Cooling 280°C	A	9 steps 60.1% 39Ar release MSWD=1.6, n=9	Greene, A.R., Scoates, J.S., Weis, D, Israel, S., Nixon, G.T., Katvala, E.C.	2008	2000	University of British Columbia; T. Ullrich	Nikolai Formation	Yukon	Volcanic	ultramafic	Yukon							574006	6790904	7
84822-1C	227.3	2.6	2.6	U/Pb	Baddeleyite	Crystallization estimate	B	206Pb/238U age from a single concordant analysis of a multi-grain baddeleyite fraction.	Parrish, R.R. and McNicoll, V.J.	1992	1456	Geological Survey of Canada (Ottawa); R. Parrish and V. McNicoll	Mafic intrusion	Central-Southern Vancouver Island	Plutonic	Porphyritic gabbroic rock; Crofton, southern Vancouver Island	British Columbia	Victoria	92B	11	16046	48.7123	123.324	476159	5395528	10	48.7125	123.323	476255	5395328	WRANGELLIA	Insular
02-CS-11	226.8	0.5	0.5	U/Pb	Zircon	Igneous crystallization age	A	206Pb/238U age for 1 of 5 fractions interpreted as the crystallization age. 206Pb/238U of other fractions yielded ages of 219.8 ± 0.7, 223.3 ± 0.5, 221.9 ± 0.6, and 233.9 ± 1.4 which were interpreted to indicate post-crystallization Pb-loss.	Sluggett, C.L.	2003	1542	University of British Columbia; C. Sluggett and J. Mortensen	Mount Tuam Gabbro	Central-Southern Vancouver Island	Plutonic	Mount Tuam Gabbro; Saltspring Island	British Columbia	Victoria	92B	11	16420	48.7354	123.467	465627	5398147	10	48.7356	123.466	465723	5397948	WRANGELLIA	Insular
HB03-29	225.7	4	4	Ar/Ar	Hornblende	Cooling 500°C	A	Plateau age, 8 fractions, 97% 39Ar released, Integrated age: 226.4 ± 2.0; Interpreted as age of magmatism.	Bittenbender, P.E., Bean, K.W., Kurtak, J. M.and Deininger, J., Jr.	2007	2001	University of Alaska, Fairbanks; P. Layer, J. Drake	Rainy Creek Complex	Alaska Range	Olivine basalt	XRD shows hornblende, minor chlorite & plagioclase	Alaska										63.3397	-145.96
10830	225.2	13	13	Ar/Ar	Hornblende	Cooling 500°C	B	Isochron age; Interpreted as an alteration age, maximum age for a reset event. Impure separate, excess Ar.	Bittenbender, P.E., Bean, K.W., Kurtak, J. M.and Deininger, J., Jr.	2007	2001	University of Alaska, Fairbanks; P. Layer, J. Drake	Olivine peridotite; Rainy Creek Complex	Alaska Range	Plutonic	Olivine peridotite	Alaska
SC2	225	14	14	K/Ar	Biotite	Cooling 280°C	A	40K/39Ar age. No analytical information available. Analysis by M. Lanphere (USGS).	Campbell, S.W.	1981	5	Analysis by M. Lanphere (USGS).	Peridotite; White River, Kluane Ranges	Yukon	Plutonic	Peridotite; White River, Kluane Ranges	Yukon	Kluane Lake	115F	15	584	61.9497	140.544	523937	6868658	7	61.95	140.542	524046	6868493	WRANGELLIA
91LKB-46	224.9	13.2	13.2	Ar/Ar	Whole rock	Cooling <200°C	B	40Ar/39Ar step-heating technique; Isochron age: 213.7 ± 20.5; 69%39Ar; n=5/7	Lassiter	1995	2015	R. Duncan, Oregon State Univ.	Karmutsen Formation	Central-Southern Vancouver Island	Volcanic	Karmutsen basalt flow, Buttle Lake, central Vancouver Island	British Columbia
SC1	224	16	16	K/Ar	Biotite	Cooling 280°C	B	40K/39Ar age. No analytical information available. Analysis at University of British Columbia by J. E. Harakal.	Campbell, S.W.	1981	5	Analysis at University of British Columbia by J. E. Harakal.	Peridotite; Tatamagouche Creek, Kluane Ranges	Yukon	Plutonic	Peridotite; Tatamagouche Creek, Kluane Ranges	Yukon	Kluane Lake	115G	6	711	61.3913	139.335	588918	6807512	7	61.3917	139.333	589028	6807347	WRANGELLIA
MVM-90-101	223.9	1.2	1.2	U/Pb	Zircon	Detrital	A	Fraction C , 2.82% discordant (between U-Pb ages). Age is 206Pb/238U age.	Mustard, P.S., Parrish, R.R. and McNicoll, V.	1995	1519	Geological Survey of Canada (Ottawa); R. Parrish and V. McNicoll	Extension Formation, Nanaimo Group	Vancouver Island	Sedimentary	basal pebble conglomerate, chert and volcanic clasts abundant in a coarse-grained lithic wacke matrix	British Columbia	Vancouver	92G	4	16113	49.1356	123.938	431550	5442950	10	49.1357	123.937	431647	5442750	WRANGELLIA	Insular
10830	222.5	6.5	6.5	Ar/Ar	Hornblende	Cooling 500°C	A	Maximum age for a reset event; Isochron	Bittenbender, P.E., Bean, K.W., Kurtak, J. M.and Deininger, J., Jr.	2007	2001	University of Alaska, Fairbanks; P. Layer, J. Drake		Alaska Range	Plutonic	Olivine peridotite	Alaska										63.2958	-145.409
Sic 1am	219.5	2.5	2.5	U/Pb	Zircon	Igneous crystallization age	B	2 concordant fractions. Age is preliminary - no plot in UBC files.	Isachsen, C.E. and Armstrong, R.L.	0	1474	University of British Columbia; C. Isachsen	Sicker Group? Karmutsen?	Central-Southern Vancouver Island	Volcanic	pyroxene-phyric mafic dyke	British Columbia	Victoria	92B	13	15985	48.8665	123.711	447833	5412858	10	48.8667	123.71	447929	5412658	WRANGELLIA	Insular
HB03-53	219.3	4.5	4.5	Ar/Ar	Amphibole	Cooling 500°C	A	5 steps 64% Ar release MSWD 3.3; minimum age of magmatism	Bittenbender, P.E., Bean, K.W., Kurtak, J. M.and Deininger, J., Jr.	2007	2001	University of Alaska, Fairbanks; P. Layer, J. Drake	Rainy Creek Complex	Alaska Range	Olivine basalt	XRD shows amphibole (actinolite?), minor plagioclase & serpentine	Alaska										63.3047	-145.96
Myra_ste	212			Rb/Sr	Whole rock	Reset	B	12 samples in suite, high degree of scatter in plot, MSWD and error not reported. Scatter reportedly due to series of metamorphic events, possibly at different times, with the isochron representing an average of the resets.	Juras, S.J.	1987	1325	University of British Columbia	Myra Formation, Sicker Group	Vancouver Island	Volcanic	12 samples ranging from rhyolite to to high-Mg basalt	British Columbia	Alberni	92F	12	16375	49.5598	125.571	314045	5492867	10	49.56	125.57	314144	5492666	WRANGELLIA	Insular
JT_McC_tuff	209.9	0.072	0.072	U/Pb	Zircon	Igneous crystallization age	A	Eruption age	Trop, J., Rioux, M.	2007	2002	MIT Geochronology Lab		Wrangell Mtns	Volcanic	felsic tuffaceous bed in McCarthy	Alaska
4124C	205.6	22	22	K/Ar	Whole rock	Igneous cooling age	B	K/Ar whole-rock method unreliable. Age reported as 201 Ma; recalibrated herein to IUGS standards using table in Dalrymple (1979)	Young, I.F.	1981	1145	Shell Development Corporation, Houston, Texas	Near base of 97 + m of plutonic rock	Vancouver Island	Plutonic	Microgabbro, except A3: Granite(?)	British Columbia	Hecate Strait	103G	6	12133	53.3149	131.341	344051	5909860	9	53.3152	131.339	344159	5909666	WRANGELLIA	Insular
NMA87-36-1-2	203	14	14	K/Ar	Hornblende	Cooling 500°C	A		Massey, N.W.D.	1992	1460	University of British Columbia; J. Harakal	Minor Intrusion	Vancouver Island	Plutonic	hornblende-feldspar porphyry dyke	British Columbia	Victoria	92B	13	16320	48.9306	123.944	430872	5420166	10	48.9307	123.942	430969	5419966	WRANGELLIA	Insular
Kunga Tuff	199.6	0.3	0.3	U/Pb	Zircon	Igneous crystallization age	A	8 fractions, age is weighted 206Pb/238U age of 3 concordant overlapping fractions.	Pálfy, J., Mortensen, J.K., Carter, E.S., Smith, P.L., Friedman, R.M. and Tipper, H.W.	2000	1265	University of British Columbia; J. Mortensen and R. Friedman	Sandilands Formation	Queen Charlotte Islands	Volcanic	reworked tuff	British Columbia	Moresby Island	103B	13	13006	52.7585	131.562	327133	5848484	9	52.7587	131.56	327239	5848287	WRANGELLIA	Insular
10156	199.5	2.1	2.1	Ar/Ar	Hornblende	Cooling 500°C	B	Alteration age; Isochron	Bittenbender, P.E., Bean, K.W., Kurtak, J. M.and Deininger, J., Jr.	2007	2001	University of Alaska, Fairbanks; P. Layer, J. Drake		Alaska Range	Plutonic	Olivine pyroxenite	Alaska										63.2903	-145.421
Nixon 2000 Hbl	199.4	3.4	3.4	Ar/Ar	Hornblende	Cooling 500°C	A	Monotonis subcircularis (Upper Norian) in nearby beds	Nixon G. T., Kelman M. C., Stevenson D., Stokes L. A. & Johnston K. A.	2006	2013	University of British Columbia; T. Ullrich and R. Friedman		Northern Vancouver Island	Volcanic	tuff	British Columbia														WRANGELLIA
HD 406	194.6	1.2	1.2	U/Pb	Zircon	Igneous crystallization age	B	2 discordant fractions, age is lower intercept of of discordia. Need at least 3 colinear fractions to validate the trend. Upper intercept (inheritance) at 1719 ±138 Ma.	Ray, G.E. and Dawson, G.L.	1994	1526	University of British Columbia; J. Gabites	Mount Riordan Stock		Plutonic	granodiorite	British Columbia	Penticton	82E	5	16342	49.4009	119.916	288478	5476119	11	49.4011	119.914	288558	5475917	WRANGELLIA	Insular
4718A3	193	26	26	Ar/Ar	Plag (1)	Cooling 250°C	A	3 steps 54.3% 39Ar release MSWD=5.1, n=3	Greene, A.R., Scoates, J.S., Weis, D, Israel, S., Nixon, G.T., Katvala, E.C.	2008	2000	University of British Columbia; T. Ullrich	Karmutsen Formation	Vancouver Island	Volcanic	pillow basalt	British Columbia							383960	5455174	10
AT-87-105-1	192.4	5	5	K/Ar	Hornblende	Cooling 500°C	A		Hunt, P.A. and Roddick, J.C.	1991	32	Geological Survey of Canada (Ottawa); Lab ID 90-28, K-Ar# 3983	San Christoval plutonic suite		Plutonic	massive to faintly foliated inclusion-bearing homogenous equigranular fresh medium- to coarse-grained biotite-hornblende quartz diorite	British Columbia	Moresby Island	103B	12	11781	52.5179	131.61	322943	5821846	9	52.5181	131.608	323050	5821650	WRANGELLIA	Insular
Shell 1	192	0	0	K/Ar	Whole rock	Igneous cooling age	B	K/Ar whole-rock method unreliable	Shell		1485	unknown	Karmutsen		Volcanic	volcanic	British Columbia	Victoria	92B	13	15865	48.9165	123.918	432742	5418578	10	48.9167	123.917	432839	5418378	WRANGELLIA	Insular
95JP36	191	0	0	U/Pb	Zircon	Minimum age estimate	A	2 fractions, one slightly reversly discordant, the other displays significant Pb-loss. Age should be treated as minimum only.	Pálfy, J., Mortensen, J.K., Smith, P.L., Friedman, R.M., McNicoll, V. and Villeneuve, M.	2000	1019	University of British Columbia, R. Friedman	Harbledown Formation		Volcanic	light grey reworked air-fall tuff	British Columbia	Alert Bay	92L	11	11144	50.6021	127.37	615350	5606850	9	50.6023	127.368	615465	5606655	WRANGELLIA	Insular
5615A6	191	11	11	Ar/Ar	Plag	Cooling 250°C	A	6 steps 82.4% 39Ar release MSWD=0.48, n=6	Greene, A.R., Scoates, J.S., Weis, D, Israel, S., Nixon, G.T., Katvala, E.C.	2008	2000	University of British Columbia; T. Ullrich	Karmutsen Formation	Vancouver Island	Volcanic	gabbro	British Columbia							624103	5601095	9
5719A5	191	11	11	Ar/Ar	Plag	Cooling 250°C	A	6 steps 82.4% 39Ar release MSWD=0.48, n=6	Greene, A.R., Scoates, J.S., Weis, D, Israel, S., Nixon, G.T., Katvala, E.C.	2008	2000	University of British Columbia; T. Ullrich	Nikolai Formation	Wrangell Mtns	Volcanic	massive flow	Alaska							430204	6840632	7
93-346	190.3	0.7	0.7	U/Pb	Zircon	Igneous crystallization age	A	3 strongly-abraded concordant overlapping fractions. Age is 206Pb/238U age of two older fractions.	DeBari, S.M., Anderson, R.G. and Mortensen, J.K.	1999	1501	University of British Columbia; J. Mortensen	Westcoast Crystalline Complex		Plutonic	slightly foliated hornblende-biotite-bearing granite	British Columbia	Cape Flattery	92C	10	16009	48.7015	124.725	373080	5395705	10	48.7017	124.724	373178	5395507	WRANGELLIA	Insular
WCT3	190	12	12	U/Pb	Zircon	Igneous crystallization age	B	2 fractions, one concordant forms basis of the age. Age reported as 178 ±12 Ma; interp. revised in summary table of CJES 1987	Isachsen, C.E.	1984	1336	University of British Columbia; C. Isachsen	Black River quartz diorite		Plutonic	quartz diorite	British Columbia	Cape Flattery	92C	9	16301	48.7317	125.106	345112	5399776	10	48.7319	125.105	345210	5399577	WRANGELLIA	Insular
Sic 1am	190	14	14	K/Ar	Hornblende	Cooling 500°C	A		Massey, N.W.D.	1992	1460	University of British Columbia, J. Harakal	Sicker Group? Karmutsen?		Volcanic	pyroxene-phyric mafic dyke	British Columbia	Victoria	92B	13	15458	48.8665	123.711	447833	5412858	10	48.8667	123.71	447929	5412658	WRANGELLIA	Insular
27-5	189	8	8	U/Pb	Zircon	Igneous crystallization age	B	2 near-concordant fractions, Pb-loss? Need 3 fractions to confirm trend	Isachsen, C.E.	1984	1336	University of British Columbia; C. Isachsen	Tofino Inlet pluton		Plutonic	quartz diorite	British Columbia	Alberni	92F	4	16303	49.2226	125.792	296729	5455951	10	49.2228	125.79	296829	5455750	WRANGELLIA	Insular
WN-18-74	186.7	8	8	K/Ar	Hornblende	Cooling 500°C	A	Age reported as 182 Ma; recalibrated herein to IUGS constants (S&J 1977)	Wanless, R.K., Stevens, R.D., Lachance, G.R. and Delabio, R.N.	1978	104	Geological Survey of Canada (Ottawa); Lab ID 76-2	Wark Diorite;		Plutonic	hornblende quartz diorite;	British Columbia	Victoria	92B	12	13603	48.579	123.56	458722	5380806	10	48.5792	123.558	458818	5380607	WRANGELLIA	Insular
CT-X-3	185	8	8	K/Ar	Phlogopite	Cooling 325°C	A	Age reported as 180 Ma; recalibrated herein to IUGS constants (S&J 1977)	Wanless, R.K., Stevens, R.D., Lachance, G.R. and Delabio, R.N.	1973	102	Geological Survey of Canada (Ottawa); Lab ID 72-18b	Island Intrusion;		Hydrothermal	skarn (magnetite) - contact of gabbro-diorite stock	British Columbia	Alert Bay	92L	6	13506	50.3568	127.251	624404	5579765	9	50.357	127.249	624522	5579571	WRANGELLIA	Insular
MV89-638	185	8	3	U/Pb	Zircon	Igneous crystallization age	A	3 fractions, touch concordia and mutually overlapping. Age is upper intercept of regression forced through zero, also = weighted mean Pb/Pb age. Expanded upper error allows for possibility of minor Pb-loss.	Friedman, R.M., Monger, J.W.H. and Tipper, H.W.	1990	1495	University of British Columbia; R. Friedman	Bowen Island Group		Volcanic	pale grey, white and green fine-grained schistose felsic metavolcanic rock	British Columbia	Vancouver	92G	5	15990	49.4706	123.566	459004	5479931	10	49.47	123.562	459100	5479730	WRANGELLIA	Coast
CT-X-3	183.4	8	8	K/Ar	Phlogopite	Cooling 325°C	A	Age reported as 180 Ma; recalibrated herein to IUGS constants (S&J 1977)	Wanless, R.K., Stevens, R.D., Lachance, G.R. and Delabio, R.N.	1973	102	Geological Survey of Canada (Ottawa); Lab ID 72-18a	Island Intrusion;		Hydrothermal	skarn (magnetite) - contact of gabbro-diorite stock	British Columbia	Alert Bay	92L	6	13505	50.3568	127.251	624404	5579765	9	50.357	127.249	624522	5579571	WRANGELLIA	Insular
11-6	183	3	3	U/Pb	Zircon	Igneous crystallization age	B	3 near-concordant fractions, not colinear.	Isachsen, C.E.	1984	1336	University of British Columbia; C. Isachsen	Westcoast diorite		Plutonic	quartz diorite gneiss	British Columbia	Alberni	92F	4	16304	49.2004	125.884	289942	5453732	10	49.2006	125.882	290041	5453531	WRANGELLIA	Insular
Strath	182	8	8	U/Pb	Zircon	Crystallization estimate	B	2 near-concordant fractions, age is range of U/Pb age most concordant fraction (min) and Pb/Pb ages (max). Age is preliminary - no plot in UBC files.	Isachsen, C.E. and Armstrong, R.L.	0	1474	University of British Columbia; C. Isachsen	Island Intrusion; Ucona Batholith		Plutonic	hornblende ~ biotite quartz monzonite;	British Columbia	Alberni	92F	13	15981	49.8223	125.98	285676	5523133	10	49.8225	125.978	285776	5522933	WRANGELLIA	Insular
96MK146	181.1	8	8	U/Pb	Zircon	Detrital	B	Spot 26.1, %discordance not reported, no plot, no data for other ages (cannot assess relative concordance). Age is 206Pb/238U age	Mahoney, J.B., Mustard, P.S., Haggart, J.W., Friedman, R.M., Fanning, C.M. and McNicoll, V.J.	1999	1579	Australian National University, Canberra; M. Fanning	Ventura Mamber, Midnight Peak Formation, Nanaimo Group		Sedimentary	not reported	British Columbia	Vancouver	92G	4	16865	49.16	123.75	445319	5445513	10	49.1602	123.749	445416	5445313	WRANGELLIA	Insular
Westcoast Complex	181	14	14	Rb/Sr	Whole rock	Igneous cooling age	B	over 30 samples regressed, 7 this study, plus many Armstrong unpublished samples for which data is not reported.	Isachsen, C.E.	1984	1336	University of British Columbia; C. Isachsen	Westcoast Complex		Plutonic	large suite of samples, info not available for most (unpublished data)	British Columbia	Alberni	92F	12	16306	49.4998	125.501	318884	5486027	10	49.5	125.5	318984	5485826	WRANGELLIA	Insular
NMA87-10-9-2	181	12	12	K/Ar	Whole rock	Igneous cooling age	B	K/Ar whole-rock method unreliable	Massey, N.W.D.	1992	1525	University of British Columbia; J. Harakal			Plutonic	hornblende andesite sill	British Columbia	Cape Flattery	92C	16	16319	48.9512	124.079	420980	5422595	10	48.9514	124.078	421077	5422395	WRANGELLIA	Insular
4720A6	180.9	3.1	3.1	Ar/Ar	Plag	Cooling 250°C	A	6 steps 95.6% 39Ar release MSWD=0.93, n=6	Greene, A.R., Scoates, J.S., Weis, D, Israel, S., Nixon, G.T., Katvala, E.C.	2008	2000	University of British Columbia; T. Ullrich	Karmutsen Formation	Vancouver Island	Volcanic	massive flow	British Columbia							704411	5566161	9
WN-19-74	180	8	8	K/Ar	Muscovite	Cooling 375°C	A		Stevens, R.D., Delabio, R.N. and Lachance, G.R.	1982	91	Geological Survey of Canada (Ottawa); Lab ID 80-21	Tyee quartz porphyry, sills and dykes;		Plutonic	schistose meta quartz porphyry	British Columbia	Victoria	92B	13	13441	48.8235	123.594	456376	5408003	10	48.8237	123.593	456472	5407804	WRANGELLIA	Insular
26-2	180	4	4	U/Pb	Zircon	Igneous crystallization age	A	3 fractions, two concordant to near-concordant form basis of the age. Age reported as 176 ±2 Ma; interp. revised in summary table of CJES 1987	Isachsen, C.E.	1984	1336	University of British Columbia; C. Isachsen	Indian Island intrusion		Plutonic	quartz diorite	British Columbia	Alberni	92F	4	16300	49.112	125.765	298201	5443592	10	49.1122	125.764	298301	5443391	WRANGELLIA	Insular
GMIC-x_ste	180	40	40	Rb/Sr	Whole rock	Igneous cooling age	B	Age is stated to be "average for 3 to 5 pt regression, MSWD ~0.9". No analytical data or plot with the UBC lab summary sheet. Samples appear to be from same dyke-body - not representative as igneous suite.	Medford, G.A.	0	1487	University of British Columbia	intrudes Bonanza Formation;		Plutonic	5 samples from a quartz feldspar porphyry dyke	British Columbia	Alert Bay	92L	11	15944	50.5998	127.477	607812	5606431	9	50.6	127.475	607927	5606236	WRANGELLIA	Insular
Myra Fm_ste	180			Rb/Sr	Whole rock	Igneous cooling age	B	6 samples in suite, seems to be a visually-fit 'isochron' which utilizes 4 of these. (MSWD and error not reported).	Holbek, P.M.	1980	1532	University of British Columbia	Myra Formation, Sicker Group		Volcanic	6 samples ranging from rhyolite to andesite and amphibolite	British Columbia	Alberni	92F	12	16374	49.5826	125.566	314539	5495386	10	49.5828	125.564	314638	5495185	WRANGELLIA	Insular
85-AB-26-187xb	177.3	1.8	1.8	U/Pb	Zircon	Igneous crystallization age	A	4 fractions (2 abraded), all concordant. Age is range of weighted mean 206Pb/207Pb ages of all fractions.	DeBari, S.M., Anderson, R.G. and Mortensen, J.K.	1999	1501	University of British Columbia; J. Mortensen	Sugsaw Lake maphic plutonic phase, Westcoast Crystalline Complex		Plutonic	unfoliated clinopyroxene-hornblende quartz diorite	British Columbia	Cape Flattery	92C	14	16007	48.8484	125.073	347957	5412676	10	48.8486	125.071	348055	5412476	WRANGELLIA	Insular
MEKA 68-2	177.1	9	9	K/Ar	Hornblende	Cooling 500°C	A	Age reported as 173 Ma; recalibrated herein to IUGS constants (S&J 1977)	Wanless, R.K., Stevens, R.D., Lachance, G.R. and Delabio, R.N.	1973	102	Geological Survey of Canada (Ottawa); Lab ID 72-15	Island Intrusions		Plutonic	granodiorite, hornblende - biotite	British Columbia	Alert Bay	92L	13	13498	50.9081	127.742	588451	5640364	9	50.9083	127.74	588566	5640168	WRANGELLIA	Insular
GS-43-6	177	40	40	K/Ar	Whole rock	Igneous cooling age	B	K/Ar whole-rock method unreliable. Age reported as 173 Ma; recalibrated herein to IUGS decay constants	Young, I.F.	1981	1145	Kreuger Enterprises Ltd., Cambridge, Mass., for Pan-american Petroleum Corporation	Karmutsen		Volcanic	Basalt	British Columbia	Graham Island	103F	14	12145	53.9486	133.161	620663	5979364	8	53.9488	133.16	620779	5979181	WRANGELLIA	Insular
5-28-1	177	12	12	K/Ar	Biotite	Cooling 280°C	A	Age reported as 172 Ma; recalibrated to IUGS decay constants herein.	Nelson, J.L.	1979	1424	University of British Columbia, J. Harakal and K. Scott	Coast Plutonic Complex		Plutonic	coarse-grained equigranular slightly-foliated biotite-hornblende quartz diorite	British Columbia	Bute Inlet	92K	5	15491	50.4373	125.904	293790	5591286	10	50.4375	125.903	293890	5591083	WRANGELLIA	Insular
Cam	177	8	8	U/Pb	Zircon	Crystallization estimate	B	2 near-concordant fractions, age is range of U/Pb age most concordant fraction (min) and Pb/Pb ages (max). Age is preliminary - no plot in UBC files.	Isachsen, C.E. and Armstrong, R.L.	0	1474	University of British Columbia; C. Isachsen	Island Intrusion; Quisam Granodiorite;		Plutonic	hornblende ~ biotite granodiorite;	British Columbia	Alberni	92F	13	15978	49.9631	125.538	317972	5537621	10	49.9633	125.537	318071	5537419	WRANGELLIA	Insular
93GNX18-6-3	177	6	6	Ar/Ar	Hornblende	Cooling 500°C	A	Plateau age; >70% gas release	Archibald, D.A. and Nixon, G.T.	1995	1527	Queen's University; D. Archibald	apophyses of Island Plutonic Suite		Plutonic	coarsely porphyritic dike-sill complex granitoids	British Columbia	Alert Bay	92L	12	16366	50.6715	127.905	577355	5613867	9	50.6717	127.904	577471	5613672	WRANGELLIA	Insular
93GNX7-4	176	3	3	Ar/Ar	Hornblende	Cooling 500°C	A	Plateau age; >70% gas release	Archibald, D.A. and Nixon, G.T.	1995	1527	Queen's University; D. Archibald	Glenlion Stock, Island Plutonic Suite		Plutonic	medium- to coarse-grained equigranular to weakly porphyritic hornblende diorite	British Columbia	Alert Bay	92L	11	16367	50.7062	127.569	601072	5618136	9	50.7064	127.567	601187	5617941	WRANGELLIA	Insular
92AP3-1-7	176	3	3	Ar/Ar	Hornblende	Cooling 500°C	A	Plateau age; % gas release not reported (is >50%); not all steps have mutual overlap (?).	Panteleyev, A., Reynolds, P.H. and Koyanagi, V.M.	1995	1528	Dalhousie University; P. Reynolds	Mead Creek stock		Plutonic	fresh diorite	British Columbia	Alert Bay	92L	12	16365	50.6888	127.813	583839	5615892	9	50.689	127.811	583955	5615697	WRANGELLIA	Insular
AT-85-11	175.7	2.6	2.6	U/Pb	Zircon	Crystallization estimate	A	3 strongly-abraded fractions, define short Pb-loss array. Age is weighted mean 206Pb/207Pb age of all fractions. A 4th fraction gives slightly older Pb/Pb age, indicating some inheritance.	DeBari, S.M., Anderson, R.G. and Mortensen, J.K.	1999	1501	University of British Columbia; J. Mortensen	Port Alberni batholith, Island Intrusions		Plutonic	biotite-hornblende quartz monzodiorite	British Columbia	Alberni	92F	2	16006	49.178	124.769	371052	5448750	10	49.1753	124.769	371150	5448550	WRANGELLIA	Insular
4124A3	175	18	18	K/Ar	Whole rock	Igneous cooling age	B	K/Ar whole-rock method unreliable. Age reported as 171 Ma; recalibrated herein to IUGS standards using table in Dalrymple (1979)	Young, I.F.	1981	1145	Shell Development Corporation, Houston, Texas	Near base of 97 + m of plutonic rock		Plutonic	Microgabbro, except A3: Granite(?)	British Columbia	Hecate Strait	103G	6	12131	53.3149	131.341	344051	5909860	9	53.3152	131.339	344159	5909666	WRANGELLIA	Insular
93-350	174.2	0.4	0.4	U/Pb	Zircon	Crystallization estimate	A	4 fractions (2 abraded). Age is range of 206Pb/238U ages of the abraded fractions which are concordant and overlapping. Unabraded fractions show evidence of very recent Pb-loss.	DeBari, S.M., Anderson, R.G. and Mortensen, J.K.	1999	1501	University of British Columbia; J. Mortensen	Westcoast Crystalline Complex		Plutonic	unfoliated hornblende diorite	British Columbia	Cape Flattery	92C	10	16010	48.6553	124.725	372965	5390578	10	48.6556	124.724	373062	5390381	WRANGELLIA	Insular
96MK146	174.1	11.6	11.6	U/Pb	Zircon	Detrital	B	Spot 2.1, %discordance not reported, no plot, no data for other ages (cannot assess relative concordance). Age is 206Pb/238U age	Mahoney, J.B., Mustard, P.S., Haggart, J.W., Friedman, R.M., Fanning, C.M. and McNicoll, V.J.	1999	1579	Australian National University, Canberra; M. Fanning	Ventura Mamber, Midnight Peak Formation, Nanaimo Group		Sedimentary	not reported	British Columbia	Vancouver	92G	4	16841	49.16	123.75	445319	5445513	10	49.1602	123.749	445416	5445313	WRANGELLIA	Insular
93GNX9-10	174	2	2	Ar/Ar	Biotite	Cooling 280°C	B	Integrated age; no plateau. Spectra strongly disturbed. Biotite reportedly chloritized.	Archibald, D.A. and Nixon, G.T.	1995	1527	Queen's University; D. Archibald	Rupert Stock, Island Plutonic Suite		Plutonic	medium- to coarse-grained equigranular to porphyritic granodiorite	British Columbia	Alert Bay	92L	11	16368	50.5966	127.418	611995	5606166	9	50.5968	127.416	612110	5605971	WRANGELLIA	Insular
93GNX7-4	174	3	3	Ar/Ar	Biotite	Cooling 280°C	B	Called 'plateau age', is actually just under 50% gas release requirement at 48%. Integrated age concordant at 173 ±4 Ma.	Archibald, D.A. and Nixon, G.T.	1995	1527	Queen's University; D. Archibald	Glenlion Stock, Island Plutonic Suite		Plutonic	medium- to coarse-grained equigranular to weakly porphyritic hornblende diorite	British Columbia	Alert Bay	92L	11	16370	50.7062	127.569	601072	5618136	9	50.7064	127.567	601187	5617941	WRANGELLIA	Insular
96MK146	173.8	4.6	4.6	U/Pb	Zircon	Detrital	B	Spot 49.1, %discordance not reported, no plot, no data for other ages (cannot assess relative concordance). Age is 206Pb/238U age	Mahoney, J.B., Mustard, P.S., Haggart, J.W., Friedman, R.M., Fanning, C.M. and McNicoll, V.J.	1999	1579	Australian National University, Canberra; M. Fanning	Ventura Mamber, Midnight Peak Formation, Nanaimo Group		Sedimentary	not reported	British Columbia	Vancouver	92G	4	16888	49.16	123.75	445319	5445513	10	49.1602	123.749	445416	5445313	WRANGELLIA	Insular
96MK146	173.5	5.6	5.6	U/Pb	Zircon	Detrital	B	Spot 37.1, %discordance not reported, no plot, no data for other ages (cannot assess relative concordance). Age is 206Pb/238U age	Mahoney, J.B., Mustard, P.S., Haggart, J.W., Friedman, R.M., Fanning, C.M. and McNicoll, V.J.	1999	1579	Australian National University, Canberra; M. Fanning	Ventura Mamber, Midnight Peak Formation, Nanaimo Group		Sedimentary	not reported	British Columbia	Vancouver	92G	4	16876	49.16	123.75	445319	5445513	10	49.1602	123.749	445416	5445313	WRANGELLIA	Insular
MEKA 74-2	173.2	17	17	K/Ar	Hornblende	Cooling 500°C	A	Age reported as 169 Ma; recalibrated herein to IUGS constants (S&J 1977)	Wanless, R.K., Stevens, R.D., Lachance, G.R. and Delabio, R.N.	1978	104	Geological Survey of Canada (Ottawa); Lab ID 76-1	Saanich granodiorite; Island Intrusion;		Plutonic	granodiorite, biotite, hornblende	British Columbia	Victoria	92B	11	13544	48.6151	123.44	467559	5384768	10	48.6153	123.439	467655	5384569	WRANGELLIA	Insular
Bonanza Lake	173	12	12	K/Ar	Biotite	Cooling 280°C	A		Rennie, C.	0	1491	University of British Columbia; J. Harakal & D. Runkle	Island Intrusion		Plutonic	biotite quartz diorite	British Columbia	Alert Bay	92L	7	15879	50.3665	126.752	659905	5581795	9	50.3667	126.75	660019	5581601	WRANGELLIA	Insular
91AP12-49	173	2	2	Ar/Ar	Hornblende	Cooling 500°C	A	Plateau age; % gas release not reported (is >50%).	Panteleyev, A., Reynolds, P.H. and Koyanagi, V.M.	1995	1528	Dalhousie University; P. Reynolds	Hushamu stock		Plutonic	Hushamu stock, possibly dyke	British Columbia	Alert Bay	92L	12	16359	50.6785	127.854	581000	5614700	9	50.6787	127.852	581116	5614505	WRANGELLIA	Insular
96MK146	173	5.9	5.9	U/Pb	Zircon	Detrital	B	Spot 25.1, %discordance not reported, no plot, no data for other ages (cannot assess relative concordance). Age is 206Pb/238U age	Mahoney, J.B., Mustard, P.S., Haggart, J.W., Friedman, R.M., Fanning, C.M. and McNicoll, V.J.	1999	1579	Australian National University, Canberra; M. Fanning	Ventura Mamber, Midnight Peak Formation, Nanaimo Group		Sedimentary	not reported	British Columbia	Vancouver	92G	4	16864	49.16	123.75	445319	5445513	10	49.1602	123.749	445416	5445313	WRANGELLIA	Insular
ATG-88-413-1	172	3	3	U/Pb	Zircon	Igneous crystallization age	A	3 concordant fractions; two overlapping. Age is Pb/Pb age of error of most concordant fraction.	Anderson, R.G. and Reichenbach, I.	1991	1246	Geological Survey of Canada, Ottawa	San Christoval segment, San Christoval plutonic suite		Plutonic	biotite-hornblende quartz diorite	British Columbia	Moresby Island	103B	12	12899	52.623	131.832	308318	5834096	9	52.6231	131.83	308425	5833900	WRANGELLIA	Insular
AT-87-111-1	172	5	5	U/Pb	Zircon	Igneous crystallization age	A	3 concordant to slightly discordant non-overlapping fractions; age is Pb/Pb age of error of most concordant fraction.	Anderson, R.G. and Reichenbach, I.	1991	1246	Geological Survey of Canada, Ottawa	San Christoval segment, San Christoval plutonic suite		Plutonic	biotite-hornblende quartz monzodiorite	British Columbia	Moresby Island	103B	12	12898	52.5477	131.685	317918	5825346	9	52.5478	131.684	318025	5825150	WRANGELLIA	Insular
26-2	172	12	12	K/Ar	Hornblende	Cooling 500°C	A		Isachsen, C.E.	1987	1441	University of British Columbia; J. Harakal and K. Scott	Indian Island intrusion		Plutonic	quartz diorite	British Columbia	Alberni	92F	4	16291	49.112	125.765	298201	5443592	10	49.1122	125.764	298301	5443391	WRANGELLIA	Insular
HFB-95-31	172	1	1	U/Pb	Zircon	Detrital	A	Fraction D5 , -0.58% discordant. Age is 206Pb/238U age.	Mahoney, J.B., Mustard, P.S., Haggart, J.W., Friedman, R.M., Fanning, C.M. and McNicoll, V.J.	1999	1579	Geological Survey of Canada, V. McNicoll	Haida Formation, Queen Charlotte basin		Sedimentary	not reported	British Columbia	Hecate Strait	103G	4	16819	53.2374	131.872	308325	5902525	9	53.2376	131.871	308434	5902330	WRANGELLIA	Insular
HFB-95-31	172	2	2	U/Pb	Zircon	Detrital	A	Fraction D4 , 0.58% discordant. Age is 206Pb/238U age.	Mahoney, J.B., Mustard, P.S., Haggart, J.W., Friedman, R.M., Fanning, C.M. and McNicoll, V.J.	1999	1579	Geological Survey of Canada, V. McNicoll	Haida Formation, Queen Charlotte basin		Sedimentary	not reported	British Columbia	Hecate Strait	103G	4	16818	53.2374	131.872	308325	5902525	9	53.2376	131.871	308434	5902330	WRANGELLIA	Insular
MVM-90-61	171.8	0.6	0.6	U/Pb	Zircon	Detrital	A	Fraction F , 0.41% discordant (between U-Pb ages). Age is 206Pb/238U age.	Mustard, P.S., Parrish, R.R. and McNicoll, V.	1995	1519	Geological Survey of Canada (Ottawa); R. Parrish and V. McNicoll	Gabriola Formation, Nanaimo Group		Sedimentary	from base of a massive coarse-grained thick bed of arkosic arenite within a succession of sandstone turbidites and minor mudstone	British Columbia	Vancouver	92G	4	16126	49.1999	123.816	440550	5450000	10	49.2001	123.815	440647	5449800	WRANGELLIA	Insular
AT-87-12-1	171	6	6	U/Pb	Zircon	Igneous crystallization age	A	3 concordant to slightly discordant non-overlapping fractions; age is Pb/Pb age of error of most concordant fraction.	Anderson, R.G. and Reichenbach, I.	1991	1246	Geological Survey of Canada, Ottawa	Woodruff Bay segment, San Christoval plutonic suite		Plutonic	biotite-hornblende quartz diorite	British Columbia	Cape Scott	102O	14	12900	51.9381	131.018	361294	5756074	9	51.9383	131.016	361400	5755875	WRANGELLIA	Insular
V8	171	6	6	U/Pb	Zircon	Igneous crystallization age	B	2 near-concordant fractions; need 3rd fraction to confirm trend. Age reported as 168 ±3 Ma; interp. revised in summary table of CJES 1987	Isachsen, C.E.	1984	1336	University of British Columbia; C. Isachsen	Wark diorite		Plutonic	diorite	British Columbia	Victoria	92B	12	16302	48.5648	123.566	458219	5379235	10	48.565	123.565	458315	5379036	WRANGELLIA	Insular
KN69-264A	171	12	12	K/Ar	Biotite	Cooling 280°C	A	Age reported as 169 Ma; recalibrated to IUGS decay constants herein.	Muller, J.E., Northcote, K.E. and Carlisle, D.	1974	1462	University of British Columbia, J. Harakal and W. White			Plutonic	granodiorite;	British Columbia	Alert Bay	92L	12	15788	50.7178	127.877	579304	5619046	9	50.718	127.875	579420	5618851	WRANGELLIA	Insular
Nan	171	23	23	U/Pb	Zircon	Crystallization estimate	B	2 near-concordant fractions, age is range of U/Pb age most concordant fraction (min) and Pb/Pb ages (max). Age is preliminary - no plot in UBC files. Lab sheets note Pb-loss is likely.	Isachsen, C.E. and Armstrong, R.L.	0	1474	University of British Columbia; C. Isachsen	Island Intrusion; Nanaimo River Batholith;		Plutonic	biotite < hornblende granodiorite;	British Columbia	Alberni	92F	1	15979	49.0873	124.273	407051	5437943	10	49.0875	124.272	407148	5437742	WRANGELLIA	Insular
SFR87-1-3-3	171	12	12	K/Ar	Whole rock	Igneous cooling age	B	K/Ar whole-rock method unreliable	Massey, N.W.D.	1992	1525	University of British Columbia; J. Harakal			Plutonic	feldspar-hornblende porphyry	British Columbia	Cape Flattery	92C	16	16316	48.9135	124.093	419899	5418418	10	48.9137	124.092	419996	5418218	WRANGELLIA	Insular
HFB-95-31	171	1	1	U/Pb	Zircon	Detrital	A	Fraction D2 , -3.64% discordant. Age is 206Pb/238U age.	Mahoney, J.B., Mustard, P.S., Haggart, J.W., Friedman, R.M., Fanning, C.M. and McNicoll, V.J.	1999	1579	Geological Survey of Canada, V. McNicoll	Haida Formation, Queen Charlotte basin		Sedimentary	not reported	British Columbia	Hecate Strait	103G	4	16816	53.2374	131.872	308325	5902525	9	53.2376	131.871	308434	5902330	WRANGELLIA	Insular
E-63-2	170.7	10	10	K/Ar	Biotite	Cooling 280°C	B	Age reported as 167 Ma; recalibrated herein to IUGS constants (S&J 1977). No correction for atmospheric argon.	Wanless, R.K., Stevens, R.D., Lachance, G.R. and Rimsaite, J.Y.H.	1966	97	Geological Survey of Canada (Ottawa); Lab ID 64-2	Island Intrusion;		Plutonic	granodiorite	British Columbia	Alberni	92F	3	13447	49.0498	125.418	323319	5435809	10	49.05	125.417	323418	5435608	WRANGELLIA	Insular
MEKA 64-2	170.7	8	8	K/Ar	Biotite	Cooling 280°C	B	Age reported as 166 Ma; recalibrated herein to IUGS constants (S&J 1977). No correction for atmospheric argon.	Wanless, R.K., Stevens, R.D., Lachance, G.R. and Edmonds, C.M.	1967	98	Geological Survey of Canada (Ottawa); Lab ID 65-18	Island Intrusion, Bedwell-Ucona Batholith;		Plutonic	granodiorite, hornblende, biotite;	British Columbia	Alberni	92F	12	13463	49.7348	125.942	288028	5513299	10	49.735	125.94	288127	5513098	WRANGELLIA	Insular
90SR35	170.6	0.6	0.6	Ar/Ar	Hornblende	Cooling 500°C	A	plateau age	Roeske, S. M., Snee,, L. W. and Pavlis, T. L.	2003	2007	USGS, Denver Argon Laboratory	Southern Wrangellia Terrane Margin	Wrangell Mtns			Alaska					60.52.55	142.26.00
96MK146	170.4	6.5	6.5	U/Pb	Zircon	Detrital	B	Spot 41.1, %discordance not reported, no plot, no data for other ages (cannot assess relative concordance). Age is 206Pb/238U age	Mahoney, J.B., Mustard, P.S., Haggart, J.W., Friedman, R.M., Fanning, C.M. and McNicoll, V.J.	1999	1579	Australian National University, Canberra; M. Fanning	Ventura Mamber, Midnight Peak Formation, Nanaimo Group		Sedimentary	not reported	British Columbia	Vancouver	92G	4	16880	49.16	123.75	445319	5445513	10	49.1602	123.749	445416	5445313	WRANGELLIA	Insular
93-388	170.3	0.9	0.9	U/Pb	Zircon	Igneous crystallization age	A	3 abraded fractions, all concordant. Age is total range of 206Pb/238U ages.	DeBari, S.M., Anderson, R.G. and Mortensen, J.K.	1999	1501	University of British Columbia; J. Mortensen	Island Intrusions		Plutonic	unfoliated hornblende quartz diorite	British Columbia	Cape Flattery	92C	9	16011	48.6776	124.105	418621	5392204	10	48.6778	124.104	418717	5392006	WRANGELLIA	Insular
96MK146	170.1	6.1	6.1	U/Pb	Zircon	Detrital	B	Spot 23.1, %discordance not reported, no plot, no data for other ages (cannot assess relative concordance). Age is 206Pb/238U age	Mahoney, J.B., Mustard, P.S., Haggart, J.W., Friedman, R.M., Fanning, C.M. and McNicoll, V.J.	1999	1579	Australian National University, Canberra; M. Fanning	Ventura Mamber, Midnight Peak Formation, Nanaimo Group		Sedimentary	not reported	British Columbia	Vancouver	92G	4	16862	49.16	123.75	445319	5445513	10	49.1602	123.749	445416	5445313	WRANGELLIA	Insular
91AP12-50	170	2	2	Ar/Ar	Sericite	Mineralization age	A	Plateau age; % gas release not reported (is >50%).	Panteleyev, A., Reynolds, P.H. and Koyanagi, V.M.	1995	1528	Dalhousie University; P. Reynolds	Hushamu stock		Hydrothermal	bleached and clay-altered fault zone in pyritic zeolite-rich diorite	British Columbia	Alert Bay	92L	12	16360	50.6781	127.854	581000	5614660	9	50.6783	127.852	581116	5614465	WRANGELLIA	Insular
HFB-95-31	170	1	1	U/Pb	Zircon	Detrital	A	Fraction D3 , -0.59% discordant. Age is 206Pb/238U age.	Mahoney, J.B., Mustard, P.S., Haggart, J.W., Friedman, R.M., Fanning, C.M. and McNicoll, V.J.	1999	1579	Geological Survey of Canada, V. McNicoll	Haida Formation, Queen Charlotte basin		Sedimentary	not reported	British Columbia	Hecate Strait	103G	4	16817	53.2374	131.872	308325	5902525	9	53.2376	131.871	308434	5902330	WRANGELLIA	Insular
HFB-95-36	170	13	13	U/Pb	Zircon	Detrital	A	Fraction D2 , 0% discordant. Age is 206Pb/238U age.	Mahoney, J.B., Mustard, P.S., Haggart, J.W., Friedman, R.M., Fanning, C.M. and McNicoll, V.J.	1999	1579	Geological Survey of Canada, V. McNicoll	Longarm Formation, Queen Charlotte basin		Sedimentary	not reported	British Columbia	Graham Island	103F	1	16806	53.1304	132.147	690850	5890575	8	53.1306	132.146	690970	5890391	WRANGELLIA	Insular
96MK146	169.9	5.3	5.3	U/Pb	Zircon	Detrital	B	Spot 44.1, %discordance not reported, no plot, no data for other ages (cannot assess relative concordance). Age is 206Pb/238U age	Mahoney, J.B., Mustard, P.S., Haggart, J.W., Friedman, R.M., Fanning, C.M. and McNicoll, V.J.	1999	1579	Australian National University, Canberra; M. Fanning	Ventura Mamber, Midnight Peak Formation, Nanaimo Group		Sedimentary	not reported	British Columbia	Vancouver	92G	4	16883	49.16	123.75	445319	5445513	10	49.1602	123.749	445416	5445313	WRANGELLIA	Insular
96MK146	169.8	5.6	5.6	U/Pb	Zircon	Detrital	B	Spot 38.1, %discordance not reported, no plot, no data for other ages (cannot assess relative concordance). Age is 206Pb/238U age	Mahoney, J.B., Mustard, P.S., Haggart, J.W., Friedman, R.M., Fanning, C.M. and McNicoll, V.J.	1999	1579	Australian National University, Canberra; M. Fanning	Ventura Mamber, Midnight Peak Formation, Nanaimo Group		Sedimentary	not reported	British Columbia	Vancouver	92G	4	16877	49.16	123.75	445319	5445513	10	49.1602	123.749	445416	5445313	WRANGELLIA	Insular
96MK146	169.5	5.2	5.2	U/Pb	Zircon	Detrital	B	Spot 17.1, %discordance not reported, no plot, no data for other ages (cannot assess relative concordance). Age is 206Pb/238U age	Mahoney, J.B., Mustard, P.S., Haggart, J.W., Friedman, R.M., Fanning, C.M. and McNicoll, V.J.	1999	1579	Australian National University, Canberra; M. Fanning	Ventura Mamber, Midnight Peak Formation, Nanaimo Group		Sedimentary	not reported	British Columbia	Vancouver	92G	4	16856	49.16	123.75	445319	5445513	10	49.1602	123.749	445416	5445313	WRANGELLIA	Insular
MEKA 67-2	169.1	9	9	K/Ar	Hornblende	Cooling 500°C	A	Age reported as 165 Ma; recalibrated herein to IUGS constants (S&J 1977)	Wanless, R.K., Stevens, R.D., Lachance, G.R. and Delabio, R.N.	1973	102	Geological Survey of Canada (Ottawa); Lab ID 72-11	"Gillies Stock"		Plutonic	granodiorite, hornblende	British Columbia	Alberni	92F	10	13504	49.704	124.546	388533	5506865	10	49.7042	124.544	388631	5506665	WRANGELLIA	Insular
4135E	169	16	16	K/Ar	Whole rock	Igneous cooling age	B	K/Ar whole-rock method unreliable. Age reported as 165 Ma; recalibrated herein to IUGS decay constants	Young, I.F.	1981	1145	Shell Development Corporation, Houston, Texas	Near middle of 165 + m section of flow and pyroclastic		Volcanic	Basalt porphyry and altered basalt	British Columbia	Moresby Island	103B	15	12136	52.7566	130.924	370185	5846932	9	52.7568	130.922	370292	5846735	WRANGELLIA	Insular
WCT3	169	6	6	Rb/Sr	WR-mineral	Igneous cooling age	B	WR + 3 min separates (plag, hbl and biot). Isochron visually tight; MSWD not reported (errorchron?)	Isachsen, C.E.	1987	1441	University of British Columbia; C. Isachsen	Black River quartz diorite		Plutonic	quartz diorite	British Columbia	Cape Flattery	92C	9	16299	48.7317	125.106	345112	5399776	10	48.7319	125.105	345210	5399577	WRANGELLIA	Insular
CN70-204B	169	10	10	K/Ar	Biotite	Cooling 280°C	A	Age reported as 166 Ma; recalibrated to IUGS decay constants herein.	Muller, J.E., Northcote, K.E. and Carlisle, D.	1974	1462	University of British Columbia, J. Harakal and W. White			Plutonic	granodiorite;	British Columbia	Cape Scott	102I	16	15783	50.8303	128.074	565227	5631363	9	50.8305	128.072	565344	5631167	WRANGELLIA	Insular
5810A6	169	2.4	2.4	Ar/Ar	Plag	Cooling 250°C	A	5 steps 80.3% 39Ar release MSWD=1.3, n=5	Greene, A.R., Scoates, J.S., Weis, D, Israel, S., Nixon, G.T., Katvala, E.C.	2008	2000	University of British Columbia; T. Ullrich	Nikolai Formation	Alaska Range	Volcanic	pillow basalt	Alaska							550268	6999748	6
03JS06B	169	3.5	3.5	Ar/Ar	Hornblende	Cooling 500°C	A	High-temperature age; Minimum magmatic age	Bittenbender, P.E., Bean, K.W., Kurtak, J. M.and Deininger, J., Jr.	2007	2001	University of Alaska, Fairbanks; P. Layer, J. Drake		Alaska Range	Volcanic	hornblende andesite porphyry	Alaska										63.27	-145.408
03JS16A	169	3.5	3.5	Ar/Ar	Hornblende	Cooling 500°C	A	Minimum magmatic age	Bittenbender, P.E., Bean, K.W., Kurtak, J. M.and Deininger, J., Jr.	2007	2001	University of Alaska, Fairbanks; P. Layer, J. Drake		Alaska Range	Volcanic	hornblende andesite porphyry	Alaska										63.23	-145.094
2-NIMP	168.6	5.3	5.3	U/Pb	Zircon	Crystallization estimate	A	3 fractions, 2 abraded. 2 concordant, one slightly discordant. Age is weighted mean 206Pb/207Pb age of the two concordant fractions.	DeBari, S.M., Anderson, R.G. and Mortensen, J.K.	1999	1501	University of British Columbia; J. Mortensen	Nimpkish batholith, Island Intrusions		Plutonic	unfoliated massive hornblende-biotite quartz diorite	British Columbia	Alert Bay	92L	2	16008	50.2123	126.781	658343	5564592	9	50.2125	126.779	658456	5564399	WRANGELLIA	Insular
QFP-40	168.5	0.6	0.6	U/Pb	Zircon	Crystallization estimate	A	3 fractions, 2 concordant and overlapping, 3rd is concordant but younger (Pb-loss pattern). Age is mean 206Pb/238U age for the two older overlapping fractions.	Ross, K.V., Friedman, R.M., Dawson, K.M. and Leitch, C.H.B.	1996	1509	University of British Columbia; R. Friedman	intramineral porphyry, Island Copper deposit intrusions		Plutonic	quartz feldspar porphyry	British Columbia	Alert Bay	92L	4	16049	50.192	127.715	591694	5560768	9	50.1923	127.714	591800	5560580	WRANGELLIA	Insular
KR94-177	168.5	0.3	1.7	U/Pb	Zircon	Igneous crystallization age	A	4 fractions, concordant with some mutual overlap. Age is oldest fraction E, assuming Pb-loss, with lower error expanded to include youngest fraction, to allow for alternate interpretation that pattern is caused by inheritance.	Ross, K.V., Friedman, R.M., Dawson, K.M. and Leitch, C.H.B.	1996	1509	University of British Columbia; R. Friedman	early porphyry, Island Copper deposit intrusions		Plutonic	rhyodacitic quartz-feldspar porphyry, with intensely magnetite alteration	British Columbia	Alert Bay	92L	4	16048	50.1942	127.736	590194	5560988	9	50.1944	127.735	590300	5560800	WRANGELLIA	Insular
ATG-88-291-4	168	4	1	U/Pb	Zircon	Igneous crystallization age	A	3 concordant non-overlapping fractions; age is Pb/Pb age and error of most concordant fraction.	Anderson, R.G. and Reichenbach, I.	1991	1246	Geological Survey of Canada, Ottawa	Burnaby Island pluton, Burnaby Island plutonic suite		Plutonic	biotite-hornblende quartz monzodiorite	British Columbia	Moresby Island	103B	6	12894	52.3663	131.276	345067	5804223	9	52.3667	131.274	345175	5804025	WRANGELLIA	Insular
DW140A	168	12	12	K/Ar	Whole rock	Igneous cooling age	B	K/Ar whole-rock method unreliable	Juras, S.J.	1987	1325	University of British Columbia, J. Harakal and K. Scott			Volcanic	QFP rhyolite vitrophyre, sericitic - deutrified, flow banded	British Columbia	Alberni	92F	12	15432	49.5698	125.581	313360	5494003	10	49.57	125.58	313459	5493802	WRANGELLIA	Insular
85626-1	168	2	2	U/Pb	Zircon	Igneous crystallization age	B	5 fractions, concordnat to sightly discordant, not colinear. Complex pattern suggests both Pb-loss and inheritance. Age is range of two most concordant (and youngest) fractions.	Parrish, R.R. and McNicoll, V.J.	1992	1456	Geological Survey of Canada (Ottawa); R. Parrish and V. McNicoll	unnamed intrusion		Plutonic	medium-grained porphyritic gabbroic intrusion	British Columbia	Victoria	92B	13	16047	48.8612	123.67	450834	5412238	10	48.8614	123.669	450931	5412038	WRANGELLIA	Insular
96MK146	167.9	6.7	6.7	U/Pb	Zircon	Detrital	B	Spot 19.1, %discordance not reported, no plot, no data for other ages (cannot assess relative concordance). Age is 206Pb/238U age	Mahoney, J.B., Mustard, P.S., Haggart, J.W., Friedman, R.M., Fanning, C.M. and McNicoll, V.J.	1999	1579	Australian National University, Canberra; M. Fanning	Ventura Mamber, Midnight Peak Formation, Nanaimo Group		Sedimentary	not reported	British Columbia	Vancouver	92G	4	16858	49.16	123.75	445319	5445513	10	49.1602	123.749	445416	5445313	WRANGELLIA	Insular
96MK146	167.9	6.2	6.2	U/Pb	Zircon	Detrital	B	Spot 7.1, %discordance not reported, no plot, no data for other ages (cannot assess relative concordance). Age is 206Pb/238U age	Mahoney, J.B., Mustard, P.S., Haggart, J.W., Friedman, R.M., Fanning, C.M. and McNicoll, V.J.	1999	1579	Australian National University, Canberra; M. Fanning	Ventura Mamber, Midnight Peak Formation, Nanaimo Group		Sedimentary	not reported	British Columbia	Vancouver	92G	4	16846	49.16	123.75	445319	5445513	10	49.1602	123.749	445416	5445313	WRANGELLIA	Insular
96MK146	167.7	5.7	5.7	U/Pb	Zircon	Detrital	B	Spot 48.1, %discordance not reported, no plot, no data for other ages (cannot assess relative concordance). Age is 206Pb/238U age	Mahoney, J.B., Mustard, P.S., Haggart, J.W., Friedman, R.M., Fanning, C.M. and McNicoll, V.J.	1999	1579	Australian National University, Canberra; M. Fanning	Ventura Mamber, Midnight Peak Formation, Nanaimo Group		Sedimentary	not reported	British Columbia	Vancouver	92G	4	16887	49.16	123.75	445319	5445513	10	49.1602	123.749	445416	5445313	WRANGELLIA	Insular
CT-A-18_8_65	167.5	20	20	K/Ar	Whole rock	Igneous cooling age	B	K/Ar whole-rock method unreliable. Age reported as 163 Ma; recalibrated herein to IUGS constants (S&J 1977)	Wanless, R.K., Stevens, R.D., Lachance, G.R. and Edmonds, C.M.	1968	99	Geological Survey of Canada (Ottawa); Lab ID 66-34	Sicker Group;		Metamorphic	schist	British Columbia	Victoria	92B	13	13469	48.8665	123.793	441843	5412917	10	48.8667	123.792	441939	5412717	WRANGELLIA	Insular
MEKA 73-6	167.3	7	7	K/Ar	Hornblende	Cooling 500°C	A	Age reported as 163 Ma; recalibrated herein to IUGS constants (S&J 1977)	Wanless, R.K., Stevens, R.D., Lachance, G.R. and Delabio, R.N.	1978	104	Geological Survey of Canada (Ottawa); Lab ID 76-4	dyke (synplutonic?) in West Coast Complex;		Metamorphic	hornblende-plagioclase hornfels	British Columbia	Cape Flattery	92C	14	13540	48.9818	125.375	326225	5428152	10	48.982	125.374	326323	5427951	WRANGELLIA	Insular
MEKA 74-1	167	7	7	K/Ar	Hornblende	Cooling 500°C	A	Age reported as 163 Ma; recalibrated herein to IUGS constants (S&J 1977)	Wanless, R.K., Stevens, R.D., Lachance, G.R. and Delabio, R.N.	1978	104	Geological Survey of Canada (Ottawa); Lab ID 76-3	Wark Diorite;		Plutonic	amphibolite	British Columbia	Victoria	92B	12	13541	48.5581	123.658	451424	5378548	10	48.5583	123.657	451520	5378349	WRANGELLIA	Insular
AT-87-61-2	167	2	2	U/Pb	Zircon	Igneous crystallization age	A	5 fractions, 4 abraded, 2 are concordant and overlapping. One fraction is reversly discordant. Age is based on the 2 concordant fractions.	Anderson, R.G. and McNicoll, V.J.	1995	1245	Geological Survey of Canada, Ottawa; V. McNicoll	Cumshewa Head pluton, Burnaby Island plutonic suite		Plutonic	hornblende-biotite quartz monzonite	British Columbia	Hecate Strait	103G	4	12883	53.0756	131.637	323323	5883927	9	53.0758	131.636	323430	5883730	WRANGELLIA	Insular
San	167	13	13	U/Pb	Zircon	Crystallization estimate	B	2 near-concordant fractions, age is range of U/Pb age most concordant fraction (min) and Pb/Pb ages (max). Age is preliminary - no plot in UBC files.	Isachsen, C.E. and Armstrong, R.L.	0	1474	University of British Columbia; C. Isachsen	Island Intrusion, Saanich Pluton;		Plutonic	biotite hornblende granodiorite;	British Columbia	Victoria	92B	11	15984	48.6106	123.441	467470	5384269	10	48.6108	123.44	467566	5384070	WRANGELLIA	Insular
93GNX25-2	167	9	9	Ar/Ar	Biotite	Cooling 280°C	B	Called a 'plateau age', but spectra does not plateau. Age is consistent with poorly constrained isochron age of 165 ±18 Ma. Integrated age: 176 ±4 Ma. Biotite reportedly chloritized.	Archibald, D.A. and Nixon, G.T.	1995	1527	Queen's University; D. Archibald	Nahwitti batholith, Island Plutonic Suite		Plutonic	coarse- to medium-grained equigranular hornblende-biotite quartz diorite to quartz monzonite	British Columbia	Alert Bay	92L	12	16371	50.7243	127.904	577347	5619742	9	50.7245	127.903	577463	5619547	WRANGELLIA	Insular
96MK146	166.9	6.4	6.4	U/Pb	Zircon	Detrital	B	Spot 29.1, %discordance not reported, no plot, no data for other ages (cannot assess relative concordance). Age is 206Pb/238U age	Mahoney, J.B., Mustard, P.S., Haggart, J.W., Friedman, R.M., Fanning, C.M. and McNicoll, V.J.	1999	1579	Australian National University, Canberra; M. Fanning	Ventura Mamber, Midnight Peak Formation, Nanaimo Group		Sedimentary	not reported	British Columbia	Vancouver	92G	4	16868	49.16	123.75	445319	5445513	10	49.1602	123.749	445416	5445313	WRANGELLIA	Insular
96MK146	166.9	7.1	7.1	U/Pb	Zircon	Detrital	B	Spot 27.1, %discordance not reported, no plot, no data for other ages (cannot assess relative concordance). Age is 206Pb/238U age	Mahoney, J.B., Mustard, P.S., Haggart, J.W., Friedman, R.M., Fanning, C.M. and McNicoll, V.J.	1999	1579	Australian National University, Canberra; M. Fanning	Ventura Mamber, Midnight Peak Formation, Nanaimo Group		Sedimentary	not reported	British Columbia	Vancouver	92G	4	16866	49.16	123.75	445319	5445513	10	49.1602	123.749	445416	5445313	WRANGELLIA	Insular
MVM-90-101	166.8	2.5	2.5	U/Pb	Zircon	Detrital	B	Fraction J , -7.54% discordant (between U-Pb ages). Age is 206Pb/238U age.	Mustard, P.S., Parrish, R.R. and McNicoll, V.	1995	1519	Geological Survey of Canada (Ottawa); R. Parrish and V. McNicoll	Extension Formation, Nanaimo Group		Sedimentary	basal pebble conglomerate, chert and volcanic clasts abundant in a coarse-grained lithic wacke matrix	British Columbia	Vancouver	92G	4	16116	49.1356	123.938	431550	5442950	10	49.1357	123.937	431647	5442750	WRANGELLIA	Insular
96MK146	166.7	6.5	6.5	U/Pb	Zircon	Detrital	B	Spot 43.1, %discordance not reported, no plot, no data for other ages (cannot assess relative concordance). Age is 206Pb/238U age	Mahoney, J.B., Mustard, P.S., Haggart, J.W., Friedman, R.M., Fanning, C.M. and McNicoll, V.J.	1999	1579	Australian National University, Canberra; M. Fanning	Ventura Mamber, Midnight Peak Formation, Nanaimo Group		Sedimentary	not reported	British Columbia	Vancouver	92G	4	16882	49.16	123.75	445319	5445513	10	49.1602	123.749	445416	5445313	WRANGELLIA	Insular
96MK146	166.3	8.6	8.6	U/Pb	Zircon	Detrital	B	Spot 14.1, %discordance not reported, no plot, no data for other ages (cannot assess relative concordance). Age is 206Pb/238U age	Mahoney, J.B., Mustard, P.S., Haggart, J.W., Friedman, R.M., Fanning, C.M. and McNicoll, V.J.	1999	1579	Australian National University, Canberra; M. Fanning	Ventura Mamber, Midnight Peak Formation, Nanaimo Group		Sedimentary	not reported	British Columbia	Vancouver	92G	4	16853	49.16	123.75	445319	5445513	10	49.1602	123.749	445416	5445313	WRANGELLIA	Insular
D187-416	166.2	0.7	0.7	U/Pb	Zircon	Crystallization estimate	A	5 fractions, 2 concordant, others display inheritance. Age is mean 206Pb/238U age and combined error of the two concordant fractions.	Ross, K.V., Friedman, R.M., Dawson, K.M. and Leitch, C.H.B.	1996	1509	University of British Columbia; R. Friedman	late porphyry, Island Copper deposit intrusions		Plutonic	quartz feldspar porphyry	British Columbia	Alert Bay	92L	4	16050	50.1923	127.729	590694	5560788	9	50.1926	127.728	590800	5560600	WRANGELLIA	Insular
96MK146	166.2	11.5	11.5	U/Pb	Zircon	Detrital	B	Spot 50.1, %discordance not reported, no plot, no data for other ages (cannot assess relative concordance). Age is 206Pb/238U age	Mahoney, J.B., Mustard, P.S., Haggart, J.W., Friedman, R.M., Fanning, C.M. and McNicoll, V.J.	1999	1579	Australian National University, Canberra; M. Fanning	Ventura Mamber, Midnight Peak Formation, Nanaimo Group		Sedimentary	not reported	British Columbia	Vancouver	92G	4	16889	49.16	123.75	445319	5445513	10	49.1602	123.749	445416	5445313	WRANGELLIA	Insular
AT-87-115-1	166	3	3	K/Ar	Hornblende	Cooling 500°C	A		Hunt, P.A. and Roddick, J.C.	1990	31	Geological Survey of Canada (Ottawa); Lab ID 89-19, K-Ar# 3979	San Christoval pluton		Plutonic	biotite-hornblende gabbro or diorite	British Columbia	Moresby Island	103B	12	11745	52.532	131.675	318543	5823571	9	52.5322	131.674	318650	5823375	WRANGELLIA	Insular
KN69-234	166	12	12	K/Ar	Biotite	Cooling 280°C	A	Age reported as 163 Ma; recalibrated to IUGS decay constants herein.	Muller, J.E., Northcote, K.E. and Carlisle, D.	1974	1462	University of British Columbia, J. Harakal and W. White			Plutonic	granodiorite;	British Columbia	Alert Bay	92L	12	15787	50.711	127.839	581940	5618327	9	50.7112	127.838	582056	5618132	WRANGELLIA	Insular
NMA86-56-11	166	16	16	K/Ar	Whole rock	Igneous cooling age	B	K/Ar whole-rock method unreliable	Massey, N.W.D.	1992	1525	University of British Columbia; J. Harakal			Plutonic	hornblende porphyry	British Columbia	Cape Flattery	92C	16	16318	48.8711	124.051	422924	5413661	10	48.8713	124.05	423020	5413461	WRANGELLIA	Insular
93GNX25-2	166	4	4	Ar/Ar	Hornblende	Cooling 500°C	A	Plateau age; >70% gas release. Isochron age is concordant at 166 ±8 Ma.	Archibald, D.A. and Nixon, G.T.	1995	1527	Queen's University; D. Archibald	Nahwitti batholith, Island Plutonic Suite		Plutonic	coarse- to medium-grained equigranular hornblende-biotite quartz diorite to quartz monzonite	British Columbia	Alert Bay	92L	12	16369	50.7243	127.904	577347	5619742	9	50.7245	127.903	577463	5619547	WRANGELLIA	Insular
HFB-95-31	166	6	6	U/Pb	Zircon	Detrital	A	Fraction B3 , -1.22% discordant. Age is 206Pb/238U age.	Mahoney, J.B., Mustard, P.S., Haggart, J.W., Friedman, R.M., Fanning, C.M. and McNicoll, V.J.	1999	1579	Geological Survey of Canada, V. McNicoll	Haida Formation, Queen Charlotte basin		Sedimentary	not reported	British Columbia	Hecate Strait	103G	4	16810	53.2374	131.872	308325	5902525	9	53.2376	131.871	308434	5902330	WRANGELLIA	Insular
MEKA 64-1	165.9	9	9	K/Ar	Biotite	Cooling 280°C	B	Age reported as 162 Ma; recalibrated herein to IUGS constants (S&J 1977). No correction for atmospheric argon.	Wanless, R.K., Stevens, R.D., Lachance, G.R. and Edmonds, C.M.	1967	98	Geological Survey of Canada (Ottawa); Lab ID 65-17	Ucona Batholith; Central Vancouver Island Batholith;		Plutonic	granodiorite, hornblende biotite quartz monzonite;	British Columbia	Alberni	92F	13	13462	49.8206	125.975	286004	5522934	10	49.8208	125.974	286104	5522734	WRANGELLIA	Insular
96MK146	165.6	6	6	U/Pb	Zircon	Detrital	B	Spot 12.1, %discordance not reported, no plot, no data for other ages (cannot assess relative concordance). Age is 206Pb/238U age	Mahoney, J.B., Mustard, P.S., Haggart, J.W., Friedman, R.M., Fanning, C.M. and McNicoll, V.J.	1999	1579	Australian National University, Canberra; M. Fanning	Ventura Mamber, Midnight Peak Formation, Nanaimo Group		Sedimentary	not reported	British Columbia	Vancouver	92G	4	16851	49.16	123.75	445319	5445513	10	49.1602	123.749	445416	5445313	WRANGELLIA	Insular
Pye	165	15	15	U/Pb	Zircon	Crystallization estimate	B	2 near-concordant fractions, age is range of U/Pb age most concordant fraction (min) and Pb/Pb ages (max). Age is preliminary - no plot in UBC files.	Isachsen, C.E. and Armstrong, R.L.	0	1474	University of British Columbia; C. Isachsen	Island Intrusion; Pye Lake Pluton;		Plutonic	biotite < hornblende quartz monzonite;	British Columbia	Bute Inlet	92K	5	15982	50.3082	125.585	315953	5576089	10	50.3083	125.583	316052	5575887	WRANGELLIA	Insular
96MK146	164.9	5.1	5.1	U/Pb	Zircon	Detrital	B	Spot 47.1, %discordance not reported, no plot, no data for other ages (cannot assess relative concordance). Age is 206Pb/238U age	Mahoney, J.B., Mustard, P.S., Haggart, J.W., Friedman, R.M., Fanning, C.M. and McNicoll, V.J.	1999	1579	Australian National University, Canberra; M. Fanning	Ventura Mamber, Midnight Peak Formation, Nanaimo Group		Sedimentary	not reported	British Columbia	Vancouver	92G	4	16886	49.16	123.75	445319	5445513	10	49.1602	123.749	445416	5445313	WRANGELLIA	Insular
96MK146	164.7	7.5	7.5	U/Pb	Zircon	Detrital	B	Spot 9.1, %discordance not reported, no plot, no data for other ages (cannot assess relative concordance). Age is 206Pb/238U age	Mahoney, J.B., Mustard, P.S., Haggart, J.W., Friedman, R.M., Fanning, C.M. and McNicoll, V.J.	1999	1579	Australian National University, Canberra; M. Fanning	Ventura Mamber, Midnight Peak Formation, Nanaimo Group		Sedimentary	not reported	British Columbia	Vancouver	92G	4	16848	49.16	123.75	445319	5445513	10	49.1602	123.749	445416	5445313	WRANGELLIA	Insular
96MK146	164.5	5	5	U/Pb	Zircon	Detrital	B	Spot 42.1, %discordance not reported, no plot, no data for other ages (cannot assess relative concordance). Age is 206Pb/238U age	Mahoney, J.B., Mustard, P.S., Haggart, J.W., Friedman, R.M., Fanning, C.M. and McNicoll, V.J.	1999	1579	Australian National University, Canberra; M. Fanning	Ventura Mamber, Midnight Peak Formation, Nanaimo Group		Sedimentary	not reported	British Columbia	Vancouver	92G	4	16881	49.16	123.75	445319	5445513	10	49.1602	123.749	445416	5445313	WRANGELLIA	Insular
ATG-88-362-2	164.4	3.6	2.4	U/Pb	Zircon	Igneous crystallization age	A	4 slightly discordant fractions on linear array; age is upper intercept.	Anderson, R.G. and Reichenbach, I.	1991	1246	Geological Survey of Canada, Ottawa	Rennell Sound intrusion, Burnaby Island plutonic suite		Plutonic	fine-grained hornblende-quartz monzonite	British Columbia	Graham Island	103F	7	12896	53.364	132.583	660804	5915483	8	53.3642	132.582	660925	5915300	WRANGELLIA	Insular
MEKA 64-8	164.3	8	8	K/Ar	Biotite	Cooling 280°C	A	Age reported as 160 Ma; recalibrated herein to IUGS constants (S&J 1977)	Wanless, R.K., Stevens, R.D., Lachance, G.R. and Edmonds, C.M.	1968	99	Geological Survey of Canada (Ottawa); Lab ID 66-33	Island Intrusion; Nanaimo River Batholith;		Plutonic	granodiorite;	British Columbia	Alberni	92F	1	13477	49.0873	124.272	407112	5437942	10	49.0875	124.271	407209	5437741	WRANGELLIA	Insular
96MK146	164.1	5.8	5.8	U/Pb	Zircon	Detrital	B	Spot 13.1, %discordance not reported, no plot, no data for other ages (cannot assess relative concordance). Age is 206Pb/238U age	Mahoney, J.B., Mustard, P.S., Haggart, J.W., Friedman, R.M., Fanning, C.M. and McNicoll, V.J.	1999	1579	Australian National University, Canberra; M. Fanning	Ventura Mamber, Midnight Peak Formation, Nanaimo Group		Sedimentary	not reported	British Columbia	Vancouver	92G	4	16852	49.16	123.75	445319	5445513	10	49.1602	123.749	445416	5445313	WRANGELLIA	Insular
AT-87-122-1	164	3	3	K/Ar	Hornblende	Cooling 500°C	A		Hunt, P.A. and Roddick, J.C.	1990	31	Geological Survey of Canada (Ottawa); Lab ID 89-18	Burnaby Island plutonic suite		Plutonic	biotite-hornblende quartz monzodiorite	British Columbia	Moresby Island	103B	12	13008	52.5795	131.571	325818	5828597	9	52.5797	131.569	325925	5828400	WRANGELLIA	Insular
AT-88-345-1	164	4	2	U/Pb	Zircon	Igneous crystallization age	A	2 concordant non-overlapping fractions; age is Pb/Pb age and error of most concordant fraction.	Anderson, R.G. and Reichenbach, I.	1991	1246	Geological Survey of Canada, Ottawa	Shields Bay porphyry, Burnaby Island plutonic suite		Volcanic	hornblende-plagioclase andesite porphyry	British Columbia	Graham Island	103F	8	12895	53.3064	132.421	671829	5909458	8	53.3233	132.419	671950	5909275	WRANGELLIA	Insular
MV-90-369	163.8	0.4	0.4	U/Pb	Zircon	Igneous crystallization age	A	2 overlapping concordant fractions.	Monger, J.W.H. and McNicoll, V.J.	1993	1508	Geological Survey of Canada (Ottawa); V. McNicoll	Bodega Point Pluton		Plutonic	medium-grained biotite hornblende quartz diorite	British Columbia	Bute Inlet	92K	3	16040	50.2484	125.364	331465	5568927	10	50.2486	125.362	331564	5568725	WRANGELLIA	Insular
96MK146	163.6	5.2	5.2	U/Pb	Zircon	Detrital	B	Spot 36.1, %discordance not reported, no plot, no data for other ages (cannot assess relative concordance). Age is 206Pb/238U age	Mahoney, J.B., Mustard, P.S., Haggart, J.W., Friedman, R.M., Fanning, C.M. and McNicoll, V.J.	1999	1579	Australian National University, Canberra; M. Fanning	Ventura Mamber, Midnight Peak Formation, Nanaimo Group		Sedimentary	not reported	British Columbia	Vancouver	92G	4	16875	49.16	123.75	445319	5445513	10	49.1602	123.749	445416	5445313	WRANGELLIA	Insular
92AP15-4-73A	163.5	3.5	3.5	Ar/Ar	Alunite	Mineralization age	B	No plateau; age is max. mineralization age based on oldest, most stable step	Panteleyev, A., Reynolds, P.H. and Koyanagi, V.M.	1995	1528	Dalhousie University; P. Reynolds			Hydrothermal	clay-altered basalt, remnant feldspars, breccia at base of silicified knob	British Columbia	Alert Bay	92L	12	16364	50.6361	127.796	585166	5610046	9	50.6362	127.794	585281	5609851	WRANGELLIA	Insular
KN68-168	163	12	12	K/Ar	Whole rock	Igneous cooling age	B	Age reported as 161 Ma; recalibrated to IUGS decay constants herein. K/Ar whole-rock method unreliable.	Muller, J.E., Northcote, K.E. and Carlisle, D.	1974	1462	University of British Columbia, J. Harakal and W. White	Bonanza		Volcanic	andesite	British Columbia	Alert Bay	92L	12	15784	50.6015	127.658	594976	5606368	9	50.6017	127.656	595091	5606173	WRANGELLIA	Insular
HFB-95-36	163	1	1	U/Pb	Zircon	Detrital	A	Fraction D3 , 0% discordant. Age is 206Pb/238U age.	Mahoney, J.B., Mustard, P.S., Haggart, J.W., Friedman, R.M., Fanning, C.M. and McNicoll, V.J.	1999	1579	Geological Survey of Canada, V. McNicoll	Longarm Formation, Queen Charlotte basin		Sedimentary	not reported	British Columbia	Graham Island	103F	1	16807	53.1304	132.147	690850	5890575	8	53.1306	132.146	690970	5890391	WRANGELLIA	Insular
MEKA 71-8	162.7	7	7	K/Ar	Hornblende	Cooling 500°C	A	Age reported as 160 Ma; recalibrated herein to IUGS constants (S&J 1977)	Wanless, R.K., Stevens, R.D., Lachance, G.R. and Delabio, R.N.	1974	103	Geological Survey of Canada (Ottawa); Lab ID 73-11	Island Intrusion;		Plutonic	qz diorite, fresh, biotite - hornblende - hypersthene;	British Columbia	Alert Bay	92L	8	13517	50.2673	126.005	713420	5572642	9	50.2675	126.004	713534	5572450	WRANGELLIA	Insular
MEKA 71-7	162.7	7	7	K/Ar	Hornblende	Cooling 500°C	A	Age reported as 159 Ma; recalibrated herein to IUGS constants (S&J 1977)	Wanless, R.K., Stevens, R.D., Lachance, G.R. and Delabio, R.N.	1974	103	Geological Survey of Canada (Ottawa); Lab ID 73-13	Island Intrusion, Adam River Batholith;		Plutonic	diorite, unfoliated, fresh, hornblende - biotite;	British Columbia	Bute Inlet	92K	5	13516	50.3761	125.982	287979	5584705	10	50.3763	125.981	288079	5584503	WRANGELLIA	Insular
96MK146	162.6	4.7	4.7	U/Pb	Zircon	Detrital	B	Spot 24.1, %discordance not reported, no plot, no data for other ages (cannot assess relative concordance). Age is 206Pb/238U age	Mahoney, J.B., Mustard, P.S., Haggart, J.W., Friedman, R.M., Fanning, C.M. and McNicoll, V.J.	1999	1579	Australian National University, Canberra; M. Fanning	Ventura Mamber, Midnight Peak Formation, Nanaimo Group		Sedimentary	not reported	British Columbia	Vancouver	92G	4	16863	49.16	123.75	445319	5445513	10	49.1602	123.749	445416	5445313	WRANGELLIA	Insular
96MK146	162.1	6	6	U/Pb	Zircon	Detrital	B	Spot 18.1, %discordance not reported, no plot, no data for other ages (cannot assess relative concordance). Age is 206Pb/238U age	Mahoney, J.B., Mustard, P.S., Haggart, J.W., Friedman, R.M., Fanning, C.M. and McNicoll, V.J.	1999	1579	Australian National University, Canberra; M. Fanning	Ventura Mamber, Midnight Peak Formation, Nanaimo Group		Sedimentary	not reported	British Columbia	Vancouver	92G	4	16857	49.16	123.75	445319	5445513	10	49.1602	123.749	445416	5445313	WRANGELLIA	Insular
8-14-1	162	12	12	K/Ar	Biotite	Cooling 280°C	A	Age reported as 158 Ma; recalibrated to IUGS decay constants herein.	Nelson, J.L.	1979	1424	University of British Columbia, J. Harakal and K. Scott	Coast Plutonic Complex		Plutonic	coarse-grained equigranular slightly-foliated biotite-hornblende quartz diorite	British Columbia	Bute Inlet	92K	5	15493	50.3845	125.679	309531	5584812	10	50.3847	125.678	309630	5584610	WRANGELLIA	Insular
WCT3	162	12	12	K/Ar	Biotite	Cooling 280°C	B	K2O<5%; biotite likely altered.	Isachsen, C.E.	1987	1441	University of British Columbia; J. Harakal and K. Scott	Black River quartz diorite		Plutonic	quartz diorite	British Columbia	Cape Flattery	92C	9	16292	48.7317	125.106	345112	5399776	10	48.7319	125.105	345210	5399577	WRANGELLIA	Insular
PSM97-001	162	9	9	U/Pb	Zircon	Detrital	B	Spot 38.1, %discordance not reported, no plot, no data for other ages (cannot assess relative concordance). Age is 206Pb/238U age	Mahoney, J.B., Mustard, P.S., Haggart, J.W., Friedman, R.M., Fanning, C.M. and McNicoll, V.J.	1999	1579	Australian National University, Canberra; M. Fanning	Protection Formation, Nanaimo Group		Sedimentary	not reported	British Columbia	Vancouver	92G	4	16977	49.1456	123.787	442634	5443941	10	49.1458	123.785	442731	5443741	WRANGELLIA	Insular
96MK146	161.6	9.3	9.3	U/Pb	Zircon	Detrital	B	Spot 11.1, %discordance not reported, no plot, no data for other ages (cannot assess relative concordance). Age is 206Pb/238U age	Mahoney, J.B., Mustard, P.S., Haggart, J.W., Friedman, R.M., Fanning, C.M. and McNicoll, V.J.	1999	1579	Australian National University, Canberra; M. Fanning	Ventura Mamber, Midnight Peak Formation, Nanaimo Group		Sedimentary	not reported	British Columbia	Vancouver	92G	4	16850	49.16	123.75	445319	5445513	10	49.1602	123.749	445416	5445313	WRANGELLIA	Insular
96MK146	161.2	4.3	4.3	U/Pb	Zircon	Detrital	B	Spot 16.1, %discordance not reported, no plot, no data for other ages (cannot assess relative concordance). Age is 206Pb/238U age	Mahoney, J.B., Mustard, P.S., Haggart, J.W., Friedman, R.M., Fanning, C.M. and McNicoll, V.J.	1999	1579	Australian National University, Canberra; M. Fanning	Ventura Mamber, Midnight Peak Formation, Nanaimo Group		Sedimentary	not reported	British Columbia	Vancouver	92G	4	16855	49.16	123.75	445319	5445513	10	49.1602	123.749	445416	5445313	WRANGELLIA	Insular
MEKA 70-11	161.1	7	7	K/Ar	Hornblende	Cooling 500°C	A	Age reported as 158 Ma; recalibrated herein to IUGS constants (S&J 1977)	Wanless, R.K., Stevens, R.D., Lachance, G.R. and Delabio, R.N.	1974	103	Geological Survey of Canada (Ottawa); Lab ID 73-18	Saanich granodiorite;		Plutonic	granodiorite, hornblende, biotite	British Columbia	Victoria	92B	12	13511	48.7318	123.838	438415	5397981	10	48.732	123.836	438512	5397782	WRANGELLIA	Insular
4723A13	161.1	7.3	7.3	Ar/Ar	Plag	Cooling 250°C	A	4 steps 79.1% 39Ar release MSWD=1.3, n=4	Greene, A.R., Scoates, J.S., Weis, D, Israel, S., Nixon, G.T., Katvala, E.C.	2008	2000	University of British Columbia; T. Ullrich	Karmutsen Formation	Vancouver Island	Volcanic	pillow basalt	British Columbia							616507	5599233	9
CN70-152	161	10	10	K/Ar	Biotite	Cooling 280°C	B	Age reported as 159 Ma; recalibrated to IUGS decay constants herein. K2O<5%; biotite likely altered	Muller, J.E., Northcote, K.E. and Carlisle, D.	1974	1462	University of British Columbia, J. Harakal and W. White			Plutonic	granodiorite;	British Columbia	Alert Bay	92L	12	15782	50.6881	127.772	586713	5615864	9	50.6883	127.771	586828	5615669	WRANGELLIA	Insular
92AP-EC-150	161	1	1	Ar/Ar	Alunite	Mineralization age	B	No plateau; age is max. mineralization age based on oldest, most stable step	Panteleyev, A., Reynolds, P.H. and Koyanagi, V.M.	1995	1528	Dalhousie University; P. Reynolds			Hydrothermal	silica rock with alunite-filled vugs	British Columbia	Alert Bay	92L	12	16361	50.5459	127.814	584000	5600000	9	50.5461	127.813	584115	5599805	WRANGELLIA	Insular
96MK146	161	6.1	6.1	U/Pb	Zircon	Detrital	B	Spot 20.1, %discordance not reported, no plot, no data for other ages (cannot assess relative concordance). Age is 206Pb/238U age	Mahoney, J.B., Mustard, P.S., Haggart, J.W., Friedman, R.M., Fanning, C.M. and McNicoll, V.J.	1999	1579	Australian National University, Canberra; M. Fanning	Ventura Mamber, Midnight Peak Formation, Nanaimo Group		Sedimentary	not reported	British Columbia	Vancouver	92G	4	16859	49.16	123.75	445319	5445513	10	49.1602	123.749	445416	5445313	WRANGELLIA	Insular
PSM97-004	161	4	4	U/Pb	Zircon	Detrital	B	Spot 30.1, %discordance not reported, no plot, no data for other ages (cannot assess relative concordance). Age is 206Pb/238U age	Mahoney, J.B., Mustard, P.S., Haggart, J.W., Friedman, R.M., Fanning, C.M. and McNicoll, V.J.	1999	1579	Australian National University, Canberra; M. Fanning	DeCourcy Formation, Nanaimo Group		Sedimentary	not reported	British Columbia	Vancouver	92G	4	16918	49.15	123.8	441662	5444439	10	49.1502	123.799	441759	5444239	WRANGELLIA	Insular
5802A6	160.7	1.3	1.3	Ar/Ar	Hbl	Cooling 500°C	A	7 steps 98.6% 39Ar release MSWD=1.13, n=7	Greene, A.R., Scoates, J.S., Weis, D, Israel, S., Nixon, G.T., Katvala, E.C.	2008	2000	University of British Columbia; T. Ullrich	Nikolai Formation	Alaska Range	Volcanic	sill?	Alaska							483733	6992950	6
96MK146	160.6	5	5	U/Pb	Zircon	Detrital	B	Spot 15.1, %discordance not reported, no plot, no data for other ages (cannot assess relative concordance). Age is 206Pb/238U age	Mahoney, J.B., Mustard, P.S., Haggart, J.W., Friedman, R.M., Fanning, C.M. and McNicoll, V.J.	1999	1579	Australian National University, Canberra; M. Fanning	Ventura Mamber, Midnight Peak Formation, Nanaimo Group		Sedimentary	not reported	British Columbia	Vancouver	92G	4	16854	49.16	123.75	445319	5445513	10	49.1602	123.749	445416	5445313	WRANGELLIA	Insular
5810A4	160.57	8.64	8.64	Ar/Ar	Plag	Cooling 250°C	A	3 steps; integrated age 68.3% 39Ar release MSWD=1.7, n=3	Greene, A.R., Scoates, J.S., Weis, D, Israel, S., Nixon, G.T., Katvala, E.C.	2008	2000	University of British Columbia; T. Ullrich	Nikolai Formation	Alaska Range	Volcanic	massive sill	Alaska							550310	6999733	6
96MK146	160.4	6.4	6.4	U/Pb	Zircon	Detrital	B	Spot 46.1, %discordance not reported, no plot, no data for other ages (cannot assess relative concordance). Age is 206Pb/238U age	Mahoney, J.B., Mustard, P.S., Haggart, J.W., Friedman, R.M., Fanning, C.M. and McNicoll, V.J.	1999	1579	Australian National University, Canberra; M. Fanning	Ventura Mamber, Midnight Peak Formation, Nanaimo Group		Sedimentary	not reported	British Columbia	Vancouver	92G	4	16885	49.16	123.75	445319	5445513	10	49.1602	123.749	445416	5445313	WRANGELLIA	Insular
96MK146	160.4	7.3	7.3	U/Pb	Zircon	Detrital	B	Spot 28.1, %discordance not reported, no plot, no data for other ages (cannot assess relative concordance). Age is 206Pb/238U age	Mahoney, J.B., Mustard, P.S., Haggart, J.W., Friedman, R.M., Fanning, C.M. and McNicoll, V.J.	1999	1579	Australian National University, Canberra; M. Fanning	Ventura Mamber, Midnight Peak Formation, Nanaimo Group		Sedimentary	not reported	British Columbia	Vancouver	92G	4	16867	49.16	123.75	445319	5445513	10	49.1602	123.749	445416	5445313	WRANGELLIA	Insular
96MK146	160.2	9	9	U/Pb	Zircon	Detrital	B	Spot 10.1, %discordance not reported, no plot, no data for other ages (cannot assess relative concordance). Age is 206Pb/238U age	Mahoney, J.B., Mustard, P.S., Haggart, J.W., Friedman, R.M., Fanning, C.M. and McNicoll, V.J.	1999	1579	Australian National University, Canberra; M. Fanning	Ventura Mamber, Midnight Peak Formation, Nanaimo Group		Sedimentary	not reported	British Columbia	Vancouver	92G	4	16849	49.16	123.75	445319	5445513	10	49.1602	123.749	445416	5445313	WRANGELLIA	Insular
MEKA 76-5	160	9	9	K/Ar	Hornblende	Cooling 500°C	A		Stevens, R.D., Delabio, R.N. and Lachance, G.R.	1982	91	Geological Survey of Canada (Ottawa); Lab ID 80-20			Plutonic	hornblende diorite, fine grained, slightly cataclastic	British Columbia	Victoria	92B	6	13430	48.4623	123.412	469508	5367769	10	48.4625	123.411	469603	5367570	WRANGELLIA	Insular
Thornbrugh	160	10	10	K/Ar	Biotite	Cooling 280°C	A	Age reported as 157 Ma; recalibrated to IUGS decay constants herein.	McKillop, G.R.	1973	1315	University of British Columbia, J. Harakal and V. Bobik	Thornbrugh Intrusions		Plutonic	bi hb quartz diorite, minor chl after bi, well foliated	British Columbia	Vancouver	92G	6	15423	49.4643	123.455	467030	5479174	10	49.4645	123.454	467126	5478974	WRANGELLIA	Coast
MV89-565	160	7	4	U/Pb	Zircon	Crystallization estimate	A	3 fractions, overlapping each other and concordia within error at 158 Ma. Age is based on weighted mean Pb/Pb age which encompasses slightly older Pb/Pb age of fraction 2.	Friedman, R.M. and Armstrong, R.L.	1995	1505	University of British Columbia; R. Friedman and R. Armstrong	unnamed intrusion; Bonanza - Island Intrusion correlative		Plutonic	hornblende-biotite quartz diorite	British Columbia	Vancouver	92G	12	16153	49.6048	123.865	437522	5495054	10	49.605	123.863	437620	5494853	WRANGELLIA	Coast
HFB-95-31	160	3	3	U/Pb	Zircon	Detrital	A	Fraction C2 , -3.23% discordant. Age is 206Pb/238U age.	Mahoney, J.B., Mustard, P.S., Haggart, J.W., Friedman, R.M., Fanning, C.M. and McNicoll, V.J.	1999	1579	Geological Survey of Canada, V. McNicoll	Haida Formation, Queen Charlotte basin		Sedimentary	not reported	British Columbia	Hecate Strait	103G	4	16813	53.2374	131.872	308325	5902525	9	53.2376	131.871	308434	5902330	WRANGELLIA	Insular
HFB-95-31	160	3	3	U/Pb	Zircon	Detrital	A	Fraction B4 , 1.23% discordant. Age is 206Pb/238U age.	Mahoney, J.B., Mustard, P.S., Haggart, J.W., Friedman, R.M., Fanning, C.M. and McNicoll, V.J.	1999	1579	Geological Survey of Canada, V. McNicoll	Haida Formation, Queen Charlotte basin		Sedimentary	not reported	British Columbia	Hecate Strait	103G	4	16811	53.2374	131.872	308325	5902525	9	53.2376	131.871	308434	5902330	WRANGELLIA	Insular
96MK146	159.8	9.9	9.9	U/Pb	Zircon	Detrital	B	Spot 8.1, %discordance not reported, no plot, no data for other ages (cannot assess relative concordance). Age is 206Pb/238U age	Mahoney, J.B., Mustard, P.S., Haggart, J.W., Friedman, R.M., Fanning, C.M. and McNicoll, V.J.	1999	1579	Australian National University, Canberra; M. Fanning	Ventura Mamber, Midnight Peak Formation, Nanaimo Group		Sedimentary	not reported	British Columbia	Vancouver	92G	4	16847	49.16	123.75	445319	5445513	10	49.1602	123.749	445416	5445313	WRANGELLIA	Insular
65-AB-22	159.5	10	10	K/Ar	Hornblende	Cooling 500°C	A	Age reported as 156 Ma; recalibrated herein to IUGS constants (S&J 1977)	Wanless, R.K., Stevens, R.D., Lachance, G.R. and Delabio, R.N.	1972	101	Geological Survey of Canada (Ottawa); Lab ID 70-3	Chinukundl Pluton		Plutonic	Qz diorite - altered. Biotite (chloritized)-hornblende	British Columbia	Hecate Strait	103G	5	11623	53.3164	131.968	302274	5911580	9	53.3167	131.967	302384	5911385	WRANGELLIA	Insular
MEKA 67-3	159.5	8	8	K/Ar	Hornblende	Cooling 500°C	A	Age reported as 155 Ma; recalibrated herein to IUGS constants (S&J 1977)	Wanless, R.K., Stevens, R.D., Lachance, G.R. and Delabio, R.N.	1973	102	Geological Survey of Canada (Ottawa); Lab ID 72-12	"East Stock" - map 17-1968, GSC p. 68-50;		Plutonic	granodiorite, biotite - hornblende	British Columbia	Alberni	92F	9	13495	49.6318	124.304	405819	5498512	10	49.632	124.303	405917	5498312	WRANGELLIA	Insular
112-CAc-77-1	159	11	11	K/Ar	Hornblende	Cooling 500°C	B	No accompanying data; not released in annual GSC summary reports	Dodds, C.J. and Campbell, R.B.	1988	181	Geological Survey of Canada; K-Ar# 2973(2)	Logan Glacier pluton		Plutonic	granodiorite medium-grained biotite hornblende granodiorite	Yukon	Mount St. Elias	115C	16	1199	60.7913	140.284	538992	6739756	7	60.7917	140.282	539106	6739592	WRANGELLIA
Thornbrough	159	5	5	U/Pb	Zircon	Crystallization estimate	A	3 fractions, concordant to slightly discordant. Age is weighted mean 206Pb/238U age of all fractions.	Friedman, R.M. and Armstrong, R.L.	1995	1505	University of British Columbia; R. Friedman and R. Armstrong	Thornbrough intrusion; Bonanza - Island Intrusion correlative; intrudes Bowen Group		Plutonic	hornblende diorite	British Columbia	Vancouver	92G	6	16154	49.4632	123.451	467295	5479043	10	49.4633	123.45	467391	5478843	WRANGELLIA	Coast
NL-7	159	12	12	K/Ar	Hornblende	Cooling 500°C	A		Massey, N.W.D.	1992	1524	University of British Columbia; J. Harakal	Island Plutonic Suite		Plutonic	quartz monzodiorite	British Columbia	Alberni	92F	1	16307	49.0811	124.465	393000	5437500	10	49.0812	124.464	393097	5437300	WRANGELLIA	Insular
96MK146	158.9	5.6	5.6	U/Pb	Zircon	Detrital	B	Spot 45.1, %discordance not reported, no plot, no data for other ages (cannot assess relative concordance). Age is 206Pb/238U age	Mahoney, J.B., Mustard, P.S., Haggart, J.W., Friedman, R.M., Fanning, C.M. and McNicoll, V.J.	1999	1579	Australian National University, Canberra; M. Fanning	Ventura Mamber, Midnight Peak Formation, Nanaimo Group		Sedimentary	not reported	British Columbia	Vancouver	92G	4	16884	49.16	123.75	445319	5445513	10	49.1602	123.749	445416	5445313	WRANGELLIA	Insular
MVM-90-101	158.5	0.3	0.3	U/Pb	Zircon	Detrital	C	Fraction H , 18.83% discordant (between U-Pb ages). Age is 206Pb/238U age.	Mustard, P.S., Parrish, R.R. and McNicoll, V.	1995	1519	Geological Survey of Canada (Ottawa); R. Parrish and V. McNicoll	Extension Formation, Nanaimo Group		Sedimentary	basal pebble conglomerate, chert and volcanic clasts abundant in a coarse-grained lithic wacke matrix	British Columbia	Vancouver	92G	4	16115	49.1356	123.938	431550	5442950	10	49.1357	123.937	431647	5442750	WRANGELLIA	Insular
MEKA 68-3	157.9	8	8	K/Ar	Hornblende	Cooling 500°C	A	Age reported as 154 Ma; recalibrated herein to IUGS constants (S&J 1977)	Wanless, R.K., Stevens, R.D., Lachance, G.R. and Delabio, R.N.	1973	102	Geological Survey of Canada (Ottawa); Lab ID 72-17	Nahwitti Batholith, Island Intrusion		Plutonic	granodiorite, hornblende - biotite	British Columbia	Alert Bay	92L	12	13500	50.7178	127.877	579304	5619046	9	50.718	127.875	579420	5618851	WRANGELLIA	Insular
MEKA 71-8	157.9	6	6	K/Ar	Biotite	Cooling 280°C	A	Age reported as 155 Ma; recalibrated herein to IUGS constants (S&J 1977)	Wanless, R.K., Stevens, R.D., Lachance, G.R. and Delabio, R.N.	1974	103	Geological Survey of Canada (Ottawa); Lab ID 73-12	Island Intrusion;		Plutonic	qz diorite, fresh, biotite - hornblende - hypersthene;	British Columbia	Alert Bay	92L	8	13518	50.2673	126.005	713420	5572642	9	50.2675	126.004	713534	5572450	WRANGELLIA	Insular
ATG-88-299-1	157.9	3.7	4.2	U/Pb	Zircon	Igneous crystallization age	A	3 slightly discordant fractions on linear array; age is lower intercept. Evidence of inheritance - upper intercept age of 309 +13.7/-13.1 Ma is inheritance age.	Anderson, R.G. and Reichenbach, I.	1991	1246	Geological Survey of Canada, Ottawa	Beresford Inlet leucocratic phase, Burnaby Island plutonic suite		Plutonic	weakly-folaited biotite trondhjemite	British Columbia	Moresby Island	103B	12	12897	52.5843	131.577	325393	5829147	9	52.5844	131.576	325500	5828950	WRANGELLIA	Insular
AT-87-124-6	157.7	3.7	3.7	K/Ar	Hornblende	Cooling 500°C	A		Hunt, P.A. and Roddick, J.C.	1991	32	Geological Survey of Canada (Ottawa); Lab ID 90-25, K-Ar# 3978	Burnaby Island plutonic suite		Plutonic	massive equigranular to seriate medium- to coarse-grained hornblende diorite	British Columbia	Moresby Island	103B	12	11778	52.5953	131.558	326743	5830322	9	52.5956	131.556	326850	5830125	WRANGELLIA	Insular
96MK146	157.4	8.9	8.9	U/Pb	Zircon	Detrital	B	Spot 40.1, %discordance not reported, no plot, no data for other ages (cannot assess relative concordance). Age is 206Pb/238U age	Mahoney, J.B., Mustard, P.S., Haggart, J.W., Friedman, R.M., Fanning, C.M. and McNicoll, V.J.	1999	1579	Australian National University, Canberra; M. Fanning	Ventura Mamber, Midnight Peak Formation, Nanaimo Group		Sedimentary	not reported	British Columbia	Vancouver	92G	4	16879	49.16	123.75	445319	5445513	10	49.1602	123.749	445416	5445313	WRANGELLIA	Insular
96MK146	157.2	6.4	6.4	U/Pb	Zircon	Detrital	B	Spot 21.1, %discordance not reported, no plot, no data for other ages (cannot assess relative concordance). Age is 206Pb/238U age	Mahoney, J.B., Mustard, P.S., Haggart, J.W., Friedman, R.M., Fanning, C.M. and McNicoll, V.J.	1999	1579	Australian National University, Canberra; M. Fanning	Ventura Mamber, Midnight Peak Formation, Nanaimo Group		Sedimentary	not reported	British Columbia	Vancouver	92G	4	16860	49.16	123.75	445319	5445513	10	49.1602	123.749	445416	5445313	WRANGELLIA	Insular
6ALe 14b	157	6	6	Ar/Ar	Biotite	Cooling 280°C	A		Grantz A., Jones D. L. and Lanphere M. A.	1967	2004	Ar analyses by M. Lanphere, K analyses by H. C. Whitehead			Plutonic	biotite granodiorite											61.733	-144.04
96MK146	156.9	6.4	6.4	U/Pb	Zircon	Detrital	B	Spot 6.1, %discordance not reported, no plot, no data for other ages (cannot assess relative concordance). Age is 206Pb/238U age	Mahoney, J.B., Mustard, P.S., Haggart, J.W., Friedman, R.M., Fanning, C.M. and McNicoll, V.J.	1999	1579	Australian National University, Canberra; M. Fanning	Ventura Mamber, Midnight Peak Formation, Nanaimo Group		Sedimentary	not reported	British Columbia	Vancouver	92G	4	16845	49.16	123.75	445319	5445513	10	49.1602	123.749	445416	5445313	WRANGELLIA	Insular
MEKA 68-2	156.3	7	7	K/Ar	Biotite	Cooling 280°C	A	Age reported as 153 Ma; recalibrated herein to IUGS constants (S&J 1977)	Wanless, R.K., Stevens, R.D., Lachance, G.R. and Delabio, R.N.	1973	102	Geological Survey of Canada (Ottawa); Lab ID 72-16	Island Intrusions		Plutonic	granodiorite, hornblende - biotite	British Columbia	Alert Bay	92L	13	13499	50.9081	127.742	588451	5640364	9	50.9083	127.74	588566	5640168	WRANGELLIA	Insular
KN68-177A	156	12	12	K/Ar	Biotite	Cooling 280°C	B	Age reported as 154 Ma; recalibrated to IUGS decay constants herein. K2O<5%; biotite likely altered.	Muller, J.E., Northcote, K.E. and Carlisle, D.	1974	1462	University of British Columbia, J. Harakal and W. White	Rupert Arm Stock;		Plutonic	quartz monzonite;	British Columbia	Alert Bay	92L	11	15785	50.5928	127.422	611662	5605733	9	50.593	127.421	611777	5605538	WRANGELLIA	Insular
93GNX7-4	156	11	11	Ar/Ar	plagioclase	Cooling 250°C	A	Plateau age; 73% gas release. Isochron age is concordant at 156 ±10 Ma.	Archibald, D.A. and Nixon, G.T.	1995	1527	Queen's University; D. Archibald	Glenlion Stock, Island Plutonic Suite		Plutonic	medium- to coarse-grained equigranular to weakly porphyritic hornblende diorite	British Columbia	Alert Bay	92L	11	16372	50.7062	127.569	601072	5618136	9	50.7064	127.567	601187	5617941	WRANGELLIA	Insular
8-14-1	155	10	10	K/Ar	Hornblende	Cooling 500°C	A	Age reported as 151 Ma; recalibrated to IUGS decay constants herein.	Nelson, J.L.	1979	1424	University of British Columbia, J. Harakal and K. Scott	Coast Plutonic Complex		Plutonic	coarse-grained equigranular slightly-foliated biotite-hornblende quartz diorite	British Columbia	Bute Inlet	92K	5	15494	50.3845	125.679	309531	5584812	10	50.3847	125.678	309630	5584610	WRANGELLIA	Insular
5-16-1	155	10	10	K/Ar	Hornblende	Cooling 500°C	A	Age reported as 152 Ma; recalibrated to IUGS decay constants herein.	Nelson, J.L.	1979	1424	University of British Columbia, J. Harakal and K. Scott	Coast Plutonic Complex		Plutonic	coarse-grained equigranular slightly-foliated biotite-hornblende quartz diorite	British Columbia	Bute Inlet	92K	5	15490	50.4195	125.866	296435	5589197	10	50.4197	125.864	296535	5588995	WRANGELLIA	Insular
HFB-95-31	155	5	5	U/Pb	Zircon	Detrital	A	Fraction B2 , -4.03% discordant. Age is 206Pb/238U age.	Mahoney, J.B., Mustard, P.S., Haggart, J.W., Friedman, R.M., Fanning, C.M. and McNicoll, V.J.	1999	1579	Geological Survey of Canada, V. McNicoll	Haida Formation, Queen Charlotte basin		Sedimentary	not reported	British Columbia	Hecate Strait	103G	4	16809	53.2374	131.872	308325	5902525	9	53.2376	131.871	308434	5902330	WRANGELLIA	Insular
CT-A-25_7_64	154.6	14	14	K/Ar	Biotite	Cooling 280°C	B	Age reported as 151 Ma; recalibrated herein to IUGS constants (S&J 1977). No correction for atmospheric argon.	Wanless, R.K., Stevens, R.D., Lachance, G.R. and Edmonds, C.M.	1967	98	Geological Survey of Canada (Ottawa); Lab ID 65-14	map unit 4, GSC map 1029A; Nimpkish Batholith, Island Intrusion;		Plutonic	qz monzonite - granodiorite, biotite - hornblende	British Columbia	Alert Bay	92L	7	13454	50.2761	126.857	652668	5571529	9	50.2763	126.856	652782	5571336	WRANGELLIA	Insular
CTKA-64-1	154.6	8	8	K/Ar	Biotite	Cooling 280°C	A	Age reported as 151 Ma; recalibrated herein to IUGS constants (S&J 1977)	Wanless, R.K., Stevens, R.D., Lachance, G.R. and Edmonds, C.M.	1968	99	Geological Survey of Canada (Ottawa); Lab ID 66-27a	Nimpkish Batholith, Island Intrusion		Plutonic	qz monzonite, slightly altered, biotite;	British Columbia	Alert Bay	92L	7	13471	50.3706	126.763	659097	5582234	9	50.3708	126.761	659211	5582040	WRANGELLIA	Insular
CTKA-64-1	154.6	7	7	K/Ar	Biotite	Cooling 280°C	A	Age reported as 151 Ma; recalibrated herein to IUGS constants (S&J 1977)	Wanless, R.K., Stevens, R.D., Lachance, G.R. and Edmonds, C.M.	1968	99	Geological Survey of Canada (Ottawa); Lab ID 66-27b	Nimpkish Batholith, Island Intrusion		Plutonic	qz monzonite, slightly altered, biotite;	British Columbia	Alert Bay	92L	7	13472	50.3706	126.763	659097	5582234	9	50.3708	126.761	659211	5582040	WRANGELLIA	Insular
96MK146	154.3	10.7	10.7	U/Pb	Zircon	Detrital	B	Spot 34.1, %discordance not reported, no plot, no data for other ages (cannot assess relative concordance). Age is 206Pb/238U age	Mahoney, J.B., Mustard, P.S., Haggart, J.W., Friedman, R.M., Fanning, C.M. and McNicoll, V.J.	1999	1579	Australian National University, Canberra; M. Fanning	Ventura Mamber, Midnight Peak Formation, Nanaimo Group		Sedimentary	not reported	British Columbia	Vancouver	92G	4	16873	49.16	123.75	445319	5445513	10	49.1602	123.749	445416	5445313	WRANGELLIA	Insular
96MK146	154.2	8.2	8.2	U/Pb	Zircon	Detrital	B	Spot 32.1, %discordance not reported, no plot, no data for other ages (cannot assess relative concordance). Age is 206Pb/238U age	Mahoney, J.B., Mustard, P.S., Haggart, J.W., Friedman, R.M., Fanning, C.M. and McNicoll, V.J.	1999	1579	Australian National University, Canberra; M. Fanning	Ventura Mamber, Midnight Peak Formation, Nanaimo Group		Sedimentary	not reported	British Columbia	Vancouver	92G	4	16871	49.16	123.75	445319	5445513	10	49.1602	123.749	445416	5445313	WRANGELLIA	Insular
MVM-90-100	154.1	5.1	5.1	U/Pb	Zircon	Detrital	A	Fraction E , 1.41% discordant (between U-Pb ages). Age is 206Pb/238U age.	Mustard, P.S., Parrish, R.R. and McNicoll, V.	1995	1519	Geological Survey of Canada (Ottawa); R. Parrish and V. McNicoll	Protection Formation, Nanaimo Group		Sedimentary	chert-rich small-pebble conglomerate with ia coarse-grained lithic arenite matrix	British Columbia	Vancouver	92G	4	16120	49.1238	123.914	433350	5441620	10	49.124	123.912	433447	5441420	WRANGELLIA	Insular
5-16-1	154	8	8	Rb/Sr	WR-biotite	Igneous cooling age	B	2 pt. isochron from WR-biotite pair. Ideally would want third point to confirm trend.	Nelson, J.L.	1979	1424	University of British Columbia; P. LeCouteur	Coast Plutonic Complex		Plutonic	coarse-grained equigranular slightly-foliated biotite-hornblende quartz diorite	British Columbia	Bute Inlet	92K	5	15896	50.4195	125.866	296435	5589197	10	50.4197	125.864	296535	5588995	WRANGELLIA	Insular
5-28-1	154	14	14	Rb/Sr	WR-biotite	Igneous cooling age	B	2 pt. isochron from WR-biotite pair. Ideally would want third point to confirm trend.	Nelson, J.L.	1979	1424	University of British Columbia; P. LeCouteur	Coast Plutonic Complex		Plutonic	coarse-grained equigranular slightly-foliated biotite-hornblende quartz diorite	British Columbia	Bute Inlet	92K	5	15897	50.4373	125.904	293790	5591286	10	50.4375	125.903	293890	5591083	WRANGELLIA	Insular
MV89-550	154	4	2	U/Pb	Zircon	Igneous crystallization age	A	3 fractions, concordant to slightly discordant. Age is combination of lower intercept (MSWD-0.14) with error tightened by U/Pb ages of concordnat fraction 2 (minimum age).	Friedman, R.M. and Armstrong, R.L.	1995	1505	University of British Columbia; R. Friedman and R. Armstrong	unnamed intrusion; Bonanza - Island Intrusion correlative		Plutonic	hornblende diorite	British Columbia	Vancouver	92G	13	16156	49.7965	123.921	433689	5516412	10	49.7967	123.92	433787	5516211	WRANGELLIA	Coast
HFB-95-31	154	5	5	U/Pb	Zircon	Detrital	A	Fraction B1 , 1.28% discordant. Age is 206Pb/238U age.	Mahoney, J.B., Mustard, P.S., Haggart, J.W., Friedman, R.M., Fanning, C.M. and McNicoll, V.J.	1999	1579	Geological Survey of Canada, V. McNicoll	Haida Formation, Queen Charlotte basin		Sedimentary	not reported	British Columbia	Hecate Strait	103G	4	16808	53.2374	131.872	308325	5902525	9	53.2376	131.871	308434	5902330	WRANGELLIA	Insular
MV-91-B3	153.6	0.4	0.4	U/Pb	Zircon	Igneous crystallization age	A	4 strongly abraded fractions, concordant to barely discordant, all overlapping. Age is mean 207Pb/235U age of the three more precise analyses.	Monger, J.W.H. and McNicoll, V.J.	1993	1508	Geological Survey of Canada (Ottawa); V. McNicoll	Ward Point Pluton		Plutonic	fine- to medium-grained biotite granodiorite	British Columbia	Bute Inlet	92K	15	16042	50.8321	124.86	369008	5632805	10	50.8317	124.859	369111	5632601	WRANGELLIA	Coast
96MK146	153.2	6.8	6.8	U/Pb	Zircon	Detrital	B	Spot 3.1, %discordance not reported, no plot, no data for other ages (cannot assess relative concordance). Age is 206Pb/238U age	Mahoney, J.B., Mustard, P.S., Haggart, J.W., Friedman, R.M., Fanning, C.M. and McNicoll, V.J.	1999	1579	Australian National University, Canberra; M. Fanning	Ventura Mamber, Midnight Peak Formation, Nanaimo Group		Sedimentary	not reported	British Columbia	Vancouver	92G	4	16842	49.16	123.75	445319	5445513	10	49.1602	123.749	445416	5445313	WRANGELLIA	Insular
Trop_2002_1	153	1	1	Ar/Ar	Hornblende	Cooling 500°C	A		Trop J. M., Ridgway K. D., Manuszak J. D. & Layer P. W.	2014	2002		Upper Jurassic Kotsina Conglomerate	Wrangell Mtns	Sedimentary	clast age	Alaska														WRANGELLIA
MEKA 76-4	153	14	14	K/Ar	Hornblende	Cooling 500°C	A		Stevens, R.D., Delabio, R.N. and Lachance, G.R.	1982	91	Geological Survey of Canada (Ottawa); Lab ID 80-19	Colquitz Gneiss		Plutonic	hornblende plagioclase gneiss, well foliated	British Columbia	Victoria	92B	6	13429	48.436	123.293	478331	5364801	10	48.4362	123.292	478426	5364602	WRANGELLIA	Insular
P16C	153	10	10	K/Ar	Whole rock	Igneous cooling age	B	K/Ar whole-rock method unreliable	Juras, S.J.	1987	1325	University of British Columbia, J. Harakal and K. Scott	Price Rhyolite alteration zone		Volcanic	hydrothermally altered thyolite lapilli tuff	British Columbia	Alberni	92F	12	15434	49.5598	125.571	314045	5492867	10	49.56	125.57	314144	5492666	WRANGELLIA	Insular
Sechelt	153	3	3	U/Pb	Zircon	Crystallization estimate	A	4 fractions, plot just below concordia in Pb-loss pattern. Age is weighted mean Pb/Pb ages.	Friedman, R.M. and Armstrong, R.L.	1995	1505	University of British Columbia; R. Friedman and R. Armstrong	Sechelt pluton; Bonanza - Island Intrusion correlative		Plutonic	biotite tonalite	British Columbia	Vancouver	92G	12	16157	49.5965	123.706	448955	5494010	10	49.5967	123.705	449052	5493808	WRANGELLIA	Coast
84ANK151A	153	4	4	U/Pb	Zircon	Igneous crystallization age	A		Plafker, G., Nokleberg, W. J. and Lull, J. S.	1989	2008	J. Aleinikoff, USGS	Southern Wrangellia Terrane Margin	Wrangell Mtns	Plutonic	Metadiorite	Alaska					60.27.17	144.53.15								WRANGELLIA
AT-87-124-4	152.5	3.1	3.1	K/Ar	Muscovite	Cooling 375°C	A		Hunt, P.A. and Roddick, J.C.	1991	32	Geological Survey of Canada (Ottawa); Lab ID 90-27, K-Ar# 3982	Burnaby Island plutonic suite		Plutonic	aplitic fine- to medium-grained peraluminous garnet muscovite trondhjemite	British Columbia	Moresby Island	103B	12	11780	52.5953	131.558	326743	5830322	9	52.5956	131.556	326850	5830125	WRANGELLIA	Insular
Trop_2002_2	152	6	6	Ar/Ar	Hornblende	Cooling 500°C	A		Trop J. M., Ridgway K. D., Manuszak J. D. & Layer P. W.	2014	2002		Upper Jurassic Kotsina Conglomerate	Wrangell Mtns	Sedimentary	clast age	Alaska														WRANGELLIA
YB 80056-1	152	10	10	K/Ar	Hornblende	Cooling 500°C	A		Yorath, C.J. and Chase, R.L.	1981	1193	University of British Columbia; J. Harakal	Clast in conglomerate, Longarm Formation.		Plutonic	Hornblende quartz diorite	British Columbia	Moresby Island	103B	6	12313	52.3748	131.28	344799	5805171	9	52.375	131.278	344907	5804973	WRANGELLIA	Insular
HFB-95-36	152	2	2	U/Pb	Zircon	Detrital	A	Fraction B1 , 3.8% discordant. Age is 206Pb/238U age.	Mahoney, J.B., Mustard, P.S., Haggart, J.W., Friedman, R.M., Fanning, C.M. and McNicoll, V.J.	1999	1579	Geological Survey of Canada, V. McNicoll	Longarm Formation, Queen Charlotte basin		Sedimentary	not reported	British Columbia	Graham Island	103F	1	16802	53.1304	132.147	690850	5890575	8	53.1306	132.146	690970	5890391	WRANGELLIA	Insular
CT-A-24_8_65	151.4	8	8	K/Ar	Phlogopite	Cooling 325°C	A	Age reported as 148 Ma; recalibrated herein to IUGS constants (S&J 1977)	Wanless, R.K., Stevens, R.D., Lachance, G.R. and Edmonds, C.M.	1968	99	Geological Survey of Canada (Ottawa); Lab ID 66-28	associated with Jurassic Island Intrusion; Zeballos Batholith;		Hydrothermal	skarn enclosing metasomatic magnetite orebody;	British Columbia	Alert Bay	92L	2	13470	50.0493	126.834	655088	5546359	9	50.0495	126.832	655201	5546167	WRANGELLIA	Insular
MEKA 68-4	151.4	7	7	K/Ar	Hornblende	Cooling 500°C	A	Age reported as 148 Ma; recalibrated herein to IUGS constants (S&J 1977)	Wanless, R.K., Stevens, R.D., Lachance, G.R. and Delabio, R.N.	1974	103	Geological Survey of Canada (Ottawa); Lab ID 73-1	Island Intrusion and/or West Coast Crystalline Complex;		Plutonic	qz diorite, biotite - hornblende	British Columbia	Cape Scott	102I	15	13535	50.8053	128.69	521809	5628219	9	50.8055	128.689	521926	5628023	WRANGELLIA	Insular
26-2	151	30	30	Rb/Sr	WR-mineral	Igneous cooling age	B	WR + 3 min separates (plag, hbl and biot). Isochron visually tight; MSWD not reported (errorchron?)	Isachsen, C.E.	1987	1441	University of British Columbia; C. Isachsen	Indian Island intrusion		Plutonic	quartz diorite	British Columbia	Alberni	92F	4	16297	49.112	125.765	298201	5443592	10	49.1122	125.764	298301	5443391	WRANGELLIA	Insular
MVM-90-100	150.8	4.2	4.2	U/Pb	Zircon	Detrital	B	Fraction C , 5.69% discordant (between U-Pb ages). Age is 206Pb/238U age.	Mustard, P.S., Parrish, R.R. and McNicoll, V.	1995	1519	Geological Survey of Canada (Ottawa); R. Parrish and V. McNicoll	Protection Formation, Nanaimo Group		Sedimentary	chert-rich small-pebble conglomerate with ia coarse-grained lithic arenite matrix	British Columbia	Vancouver	92G	4	16118	49.1238	123.914	433350	5441620	10	49.124	123.912	433447	5441420	WRANGELLIA	Insular
MVM-90-100	150.8	5.4	5.4	U/Pb	Zircon	Detrital	A	Fraction B , 3.21% discordant (between U-Pb ages). Age is 206Pb/238U age.	Mustard, P.S., Parrish, R.R. and McNicoll, V.	1995	1519	Geological Survey of Canada (Ottawa); R. Parrish and V. McNicoll	Protection Formation, Nanaimo Group		Sedimentary	chert-rich small-pebble conglomerate with ia coarse-grained lithic arenite matrix	British Columbia	Vancouver	92G	4	16117	49.1238	123.914	433350	5441620	10	49.124	123.912	433447	5441420	WRANGELLIA	Insular
Thornbrugh	150	10	10	K/Ar	Hornblende	Cooling 500°C	A	Age reported as 148 Ma; recalibrated to IUGS decay constants herein.	McKillop, G.R.	1973	1315	University of British Columbia, J. Harakal and V. Bobik	Thornbrugh Intrusions		Plutonic	bi hb quartz diorite, minor chl after bi, well foliated	British Columbia	Vancouver	92G	6	15424	49.4643	123.455	467030	5479174	10	49.4645	123.454	467126	5478974	WRANGELLIA	Coast
5-16-1	150	10	10	K/Ar	Biotite	Cooling 280°C	A	Age reported as 147 Ma; recalibrated to IUGS decay constants herein.	Nelson, J.L.	1979	1424	University of British Columbia, J. Harakal and K. Scott	Coast Plutonic Complex		Plutonic	coarse-grained equigranular slightly-foliated biotite-hornblende quartz diorite	British Columbia	Bute Inlet	92K	5	15489	50.4195	125.866	296435	5589197	10	50.4197	125.864	296535	5588995	WRANGELLIA	Insular
PSM97-001	150	5	5	U/Pb	Zircon	Detrital	B	Spot 7.1, %discordance not reported, no plot, no data for other ages (cannot assess relative concordance). Age is 206Pb/238U age	Mahoney, J.B., Mustard, P.S., Haggart, J.W., Friedman, R.M., Fanning, C.M. and McNicoll, V.J.	1999	1579	Australian National University, Canberra; M. Fanning	Protection Formation, Nanaimo Group		Sedimentary	not reported	British Columbia	Vancouver	92G	4	16945	49.1456	123.787	442634	5443941	10	49.1458	123.785	442731	5443741	WRANGELLIA	Insular
5712A1	149.86	0.93	0.93	Ar/Ar	Hbl	Cooling 500°C	A	6 steps 53.5% 39Ar release MSWD=0.56, n=6	Greene, A.R., Scoates, J.S., Weis, D, Israel, S., Nixon, G.T., Katvala, E.C.	2008	2000	University of British Columbia; T. Ullrich	Chitina batholith	Wrangell Mtns	Volcanic	hornblende-phyric hypabyssal rock	Alaska							353845	6838251	7
MEKA 71-9	149.8	7	7	K/Ar	Biotite	Cooling 280°C	A	Age reported as 146 Ma; recalibrated herein to IUGS constants (S&J 1977)	Wanless, R.K., Stevens, R.D., Lachance, G.R. and Delabio, R.N.	1974	103	Geological Survey of Canada (Ottawa); Lab ID 73-14	Island Intrusion; Pye Lake Intrusion;		Plutonic	biotite hornblende granodiorite;	British Columbia	Bute Inlet	92K	5	13519	50.3128	125.586	315888	5576610	10	50.313	125.585	315987	5576408	WRANGELLIA	Insular
HFB-95-36	149	2	2	U/Pb	Zircon	Detrital	A	Fraction A1 , -4.2% discordant. Age is 206Pb/238U age.	Mahoney, J.B., Mustard, P.S., Haggart, J.W., Friedman, R.M., Fanning, C.M. and McNicoll, V.J.	1999	1579	Geological Survey of Canada, V. McNicoll	Longarm Formation, Queen Charlotte basin		Sedimentary	not reported	British Columbia	Graham Island	103F	1	16801	53.1304	132.147	690850	5890575	8	53.1306	132.146	690970	5890391	WRANGELLIA	Insular
96MK146	149	6.3	6.3	U/Pb	Zircon	Detrital	B	Spot 35.1, %discordance not reported, no plot, no data for other ages (cannot assess relative concordance). Age is 206Pb/238U age	Mahoney, J.B., Mustard, P.S., Haggart, J.W., Friedman, R.M., Fanning, C.M. and McNicoll, V.J.	1999	1579	Australian National University, Canberra; M. Fanning	Ventura Mamber, Midnight Peak Formation, Nanaimo Group		Sedimentary	not reported	British Columbia	Vancouver	92G	4	16874	49.16	123.75	445319	5445513	10	49.1602	123.749	445416	5445313	WRANGELLIA	Insular
PSM97-001	149	5	5	U/Pb	Zircon	Detrital	B	Spot 23.1, %discordance not reported, no plot, no data for other ages (cannot assess relative concordance). Age is 206Pb/238U age	Mahoney, J.B., Mustard, P.S., Haggart, J.W., Friedman, R.M., Fanning, C.M. and McNicoll, V.J.	1999	1579	Australian National University, Canberra; M. Fanning	Protection Formation, Nanaimo Group		Sedimentary	not reported	British Columbia	Vancouver	92G	4	16961	49.1456	123.787	442634	5443941	10	49.1458	123.785	442731	5443741	WRANGELLIA	Insular
5712A4	148.8	0.83	0.83	Ar/Ar	Hbl	Cooling 500°C	A	6 steps 61.4% 39Ar release MSWD=0.67, n=6	Greene, A.R., Scoates, J.S., Weis, D, Israel, S., Nixon, G.T., Katvala, E.C.	2008	2000	University of British Columbia; T. Ullrich	Chitina batholith	Wrangell Mtns	Volcanic	hornblende-phyric hypabyssal rock	Alaska							354987	6838291	7
89SR88a	148.7	0.9	0.9	Ar/Ar	Hornblende	Cooling 500°C	A	high-T isochron age	Roeske, S. M., Snee,, L. W. and Pavlis, T. L.	2003	2007	USGS, Denver Argon Laboratory	Southern Wrangellia Terrane Margin	Wrangell Mtns			Alaska					61.18.13	144.13.15
YB 80056-1	148	10	10	K/Ar	Hornblende	Cooling 500°C	A		Yorath, C.J. and Chase, R.L.	1981	1193	University of British Columbia; J. Harakal	Clast in conglomerate, Longarm Formation.		Plutonic	Hornblende quartz diorite	British Columbia	Moresby Island	103B	6	12312	52.3748	131.28	344799	5805171	9	52.375	131.278	344907	5804973	WRANGELLIA	Insular
KN69-327	148	12	12	K/Ar	Whole rock	Igneous cooling age	B	Age reported as 145 Ma; recalibrated to IUGS decay constants herein. K/Ar whole-rock method unreliable.	Muller, J.E., Northcote, K.E. and Carlisle, D.	1974	1462	University of British Columbia, J. Harakal and W. White	Bonanza		Volcanic	rhyodacite;	British Columbia	Ashcroft	92I	9	15789	50.6415	128.131	561426	5610316	9	50.6417	128.13	561542	5610121	WRANGELLIA	Insular
PN 70-179A	148	10	10	K/Ar	Biotite	Cooling 280°C	B	Age reported as 145 Ma; recalibrated to IUGS decay constants herein. K2O<5%; biotite likely altered.	Muller, J.E., Northcote, K.E. and Carlisle, D.	1974	1462	University of British Columbia, J. Harakal and W. White			Plutonic	granodiorite;	British Columbia	Alert Bay	92L	12	15792	50.6951	127.878	579260	5616524	9	50.6953	127.876	579376	5616329	WRANGELLIA	Insular
SFR86-7-2-2	148	12	12	K/Ar	Whole rock	Igneous cooling age	B	K/Ar whole-rock method unreliable	Massey, N.W.D.	1992	1525	University of British Columbia; J. Harakal			Plutonic	hornblende porphyry	British Columbia	Cape Flattery	92C	16	16317	48.9576	124.28	406306	5423534	10	48.9578	124.279	406403	5423334	WRANGELLIA	Insular
92AP15-2-72B	147.5	2.5	2.5	Ar/Ar	Alunite	Mineralization age	B	No plateau; age is max. mineralization age based on oldest, most stable step	Panteleyev, A., Reynolds, P.H. and Koyanagi, V.M.	1995	1528	Dalhousie University; P. Reynolds			Hydrothermal	relict tuff/breccia, massive silica hydrothermal overprint, pink massive, earthy, fracture filling is alunite	British Columbia	Alert Bay	92L	12	16363	50.631	127.787	585758	5609490	9	50.6312	127.786	585873	5609295	WRANGELLIA	Insular
92AP15-1-71B	147.5	2.5	2.5	Ar/Ar	Alunite	Mineralization age	B	No plateau; age is max. mineralization age based on oldest, most stable step	Panteleyev, A., Reynolds, P.H. and Koyanagi, V.M.	1995	1528	Dalhousie University; P. Reynolds			Volcanic	thin-bedded tuffs, pink/tan patches along bedding	British Columbia	Alert Bay	92L	12	16362	50.6291	127.784	585999	5609291	9	50.6293	127.782	586114	5609096	WRANGELLIA	Insular
82-CAc-77-1	147	8	8	K/Ar	Hornblende	Cooling 500°C	B	No accompanying data; not released in annual GSC summary reports	Dodds, C.J. and Campbell, R.B.	1988	181	Geological Survey of Canada; K-Ar# 2903	Hubbard Glacier pluton		Plutonic	granodiorite medium-grained biotite hornblende granodiorite	Yukon	Mount St. Elias	115C	9	1192	60.6796	140.17	545320	6727391	7	60.68	140.168	545434	6727227	WRANGELLIA
CT-A-25_7_64	146.6	60	60	K/Ar	Hornblende	Cooling 500°C	B	Age reported as 143 Ma; recalibrated herein to IUGS constants (S&J 1977). No correction for atmospheric argon.	Wanless, R.K., Stevens, R.D., Lachance, G.R. and Edmonds, C.M.	1967	98	Geological Survey of Canada (Ottawa); Lab ID 65-15	map unit 4, GSC map 1029A; Nimpkish Batholith, Island Intrusion;		Plutonic	qz monzonite - granodiorite, biotite - hornblende	British Columbia	Alert Bay	92L	7	13455	50.2761	126.857	652668	5571529	9	50.2763	126.856	652782	5571336	WRANGELLIA	Insular
65-AB-20	146.6	8	8	K/Ar	Hornblende	Cooling 500°C	A	Age reported as 143 Ma; recalibrated herein to IUGS constants (S&J 1977)	Wanless, R.K., Stevens, R.D., Lachance, G.R. and Delabio, R.N.	1972	101	Geological Survey of Canada (Ottawa); Lab ID 70-1	Kano Batholith, Mapunit JS BCDOM Bull. 54, W phase		Plutonic	gneissic granodiorite - cataclastic Biotite-hornblende	British Columbia	Graham Island	103F	7	11633	53.2914	132.643	657072	5907277	8	53.2917	132.642	657193	5907094	WRANGELLIA	Insular
91SR25c	146.1	0.2	0.2	Ar/Ar	Hornblende	Cooling 500°C	A	plateau age	Roeske, S. M., Snee,, L. W. and Pavlis, T. L.	2003	2007	USGS, Denver Argon Laboratory	Southern Wrangellia Terrane Margin	Wrangell Mtns			Alaska					61.17.59	144.17.24
Welsh 3	146			Ar/Ar	Hornblende	Cooling 500°C	A		Welsh, T. F.	1986	2006	Princeton
5712A1	145.6	1.2	1.2	Ar/Ar	Plag	Cooling 250°C	A	6 steps 84.6% 39Ar release MSWD=0.91, n=6	Greene, A.R., Scoates, J.S., Weis, D, Israel, S., Nixon, G.T., Katvala, E.C.	2008	2000	University of British Columbia; T. Ullrich	Chitina batholith	Wrangell Mtns	Volcanic	hornblende-phyric hypabyssal rock	Alaska							353845	6838251	7
65-AB4	145	37	37	K/Ar	Hornblende	Cooling 500°C	A	Age reported as 142 Ma; recalibrated herein to IUGS constants (S&J 1977)	Wanless, R.K., Stevens, R.D., Lachance, G.R. and Edmonds, C.M.	1968	99	Geological Survey of Canada (Ottawa); Lab ID 66-14	Burnaby Island Pluton		Plutonic	granodiorite, fresh. Biotite-hornblende	British Columbia	Moresby Island	103B	6	11576	52.3665	131.252	346698	5804184	9	52.3667	131.25	346806	5803986	WRANGELLIA	Insular
65-AB-9	145	14	14	K/Ar	Hornblende	Cooling 500°C	A	Age reported as 142 Ma; recalibrated herein to IUGS constants (S&J 1977)	Wanless, R.K., Stevens, R.D., Lachance, G.R. and Delabio, R.N.	1970	100	Geological Survey of Canada (Ottawa); Lab ID 67-20	San Christoval Batholith, E contact		Plutonic	qz diorite, foliated. pg sericitized. bi altered,deformed; bi-hb	British Columbia	Moresby Island	103B	12	11577	52.5748	131.668	319190	5828313	9	52.575	131.667	319297	5828117	WRANGELLIA	Insular
MEKA 71-9	145	7	7	K/Ar	Hornblende	Cooling 500°C	A	Age reported as 142 Ma; recalibrated herein to IUGS constants (S&J 1977)	Wanless, R.K., Stevens, R.D., Lachance, G.R. and Delabio, R.N.	1974	103	Geological Survey of Canada (Ottawa); Lab ID 73-15	Island Intrusion; Pye Lake Intrusion;		Plutonic	biotite hornblende granodiorite;	British Columbia	Bute Inlet	92K	5	13520	50.3128	125.586	315888	5576610	10	50.313	125.585	315987	5576408	WRANGELLIA	Insular
MEKA 70-13	145	6	6	K/Ar	Hornblende	Cooling 500°C	A	Age reported as 141 Ma; recalibrated herein to IUGS constants (S&J 1977)	Wanless, R.K., Stevens, R.D., Lachance, G.R. and Delabio, R.N.	1974	103	Geological Survey of Canada (Ottawa); Lab ID 73-19	Island Intrusion		Plutonic	granodiorite, hornblende	British Columbia	Victoria	92B	12	13512	48.7123	123.768	443504	5395760	10	48.7125	123.767	443600	5395561	WRANGELLIA	Insular
MV-91-B19	145	2	2	U/Pb	Titanite	Igneous crystallization age	A	3 near-concordant overlapping fractions; age is mean 207Pb/206Pb age. Minor Pb-loss suspected. Sample did not yield any zircons.	Monger, J.W.H. and McNicoll, V.J.	1993	1508	Geological Survey of Canada (Ottawa); V. McNicoll	Paradise River Pluton		Plutonic	biotite hornblende quartz diorite	British Columbia	Bute Inlet	92K	10	16041	50.5887	124.935	363011	5605873	10	50.5889	124.939	363111	5605671	WRANGELLIA	Coast
Welsh 2	145			Ar/Ar	Hornblende	Cooling 500°C	A		Welsh, T. F.	1986	2006	Princeton					Alaska
89SR137	144.8	0.5	0.5	Ar/Ar	Hornblende	Cooling 500°C	A		Roeske S. M., Pavlis T. L., Snee L. W. and Sisson V. B.	1992	2005	USGS Denver					Alaska										60.57.1	142.31.2
90SR05	144.6	0.6	0.6	Ar/Ar	Hornblende	Cooling 500°C	A	plateau age	Roeske, S. M., Snee,, L. W. and Pavlis, T. L.	2003	2007	USGS, Denver Argon Laboratory	Southern Wrangellia Terrane Margin	Wrangell Mtns			Alaska					60.54.05	142.26.40
89SR130c	144.4	0.7	0.7	Ar/Ar	Hornblende	Cooling 500°C	A		Roeske S. M., Pavlis T. L., Snee L. W. and Sisson V. B.	1992	2005	USGS Denver					Alaska										60.58.30	142.30.45
89SR123e	144.2	0.5	0.5	Ar/Ar	Hornblende	Cooling 500°C	A		Roeske S. M., Pavlis T. L., Snee L. W. and Sisson V. B.	1992	2005	USGS Denver					Alaska										60.58.50	142.30.25
AT-87-83-1	143.9	5.1	5.1	K/Ar	Hornblende	Cooling 500°C	A		Hunt, P.A. and Roddick, J.C.	1991	32	Geological Survey of Canada (Ottawa); Lab ID 90-26, K-Ar# 3981	Burnaby Island plutonic suite		Plutonic	massive slightly chloritized and fractured inclusion-bearing equigranular medium-grained hornblende-biotite quartz diorite	British Columbia	Moresby Island	103B	6	11779	52.4467	131.294	344092	5813198	9	52.4469	131.292	344200	5813000	WRANGELLIA	Insular
89SR126g	143.6	0.6	0.6	Ar/Ar	Hornblende	Cooling 500°C	A		Roeske S. M., Pavlis T. L., Snee L. W. and Sisson V. B.	1992	2005	USGS Denver					Alaska										60.59.20	142.31.1
91SR58h	143.6	0.4	0.4	Ar/Ar	Hornblende	Cooling 500°C	A	plateau age	Roeske, S. M., Snee,, L. W. and Pavlis, T. L.	2003	2007	USGS, Denver Argon Laboratory	Southern Wrangellia Terrane Margin	Wrangell Mtns			Alaska					60.57.22	142.23.03
90SR14b	143.3	0.6	0.6	Ar/Ar	Hornblende	Cooling 500°C	A	plateau age	Roeske, S. M., Snee,, L. W. and Pavlis, T. L.	2003	2007	USGS, Denver Argon Laboratory	Southern Wrangellia Terrane Margin	Wrangell Mtns			Alaska					60.55.17	142.27.13
91SR25d	143.2	0.4	0.4	Ar/Ar	Hornblende	Cooling 500°C	A	plateau age	Roeske, S. M., Snee,, L. W. and Pavlis, T. L.	2003	2007	USGS, Denver Argon Laboratory	Southern Wrangellia Terrane Margin	Wrangell Mtns			Alaska					61.17.59	144.17.24
WCC	143	54	54	Rb/Sr	Whole rock	Igneous cooling age	B	7 samples regressed; wide scatter, MSWD not reported. Visually does not appear to meet criterion for isochron (vs. errorchron)	Isachsen, C.E.	1984	1336	University of British Columbia; C. Isachsen	Westcoast Crystalline Complex		Plutonic	7 samples of varied lithologies: trondjemite, diorite, amphibolite	British Columbia	Alberni	92F	4	16305	49.2004	125.884	289942	5453732	10	49.2006	125.882	290041	5453531	WRANGELLIA	Insular
5-28-1	143	10	10	K/Ar	Hornblende	Cooling 500°C	A	Age reported as 140 Ma; recalibrated to IUGS decay constants herein.	Nelson, J.L.	1979	1424	University of British Columbia, J. Harakal and K. Scott	Coast Plutonic Complex		Plutonic	coarse-grained equigranular slightly-foliated biotite-hornblende quartz diorite	British Columbia	Bute Inlet	92K	5	15492	50.4373	125.904	293790	5591286	10	50.4375	125.903	293890	5591083	WRANGELLIA	Insular
91SR77g	143	1.9	1.9	Ar/Ar	Hornblende	Cooling 500°C	A	plateau age	Roeske, S. M., Snee,, L. W. and Pavlis, T. L.	2003	2007	USGS, Denver Argon Laboratory	Southern Wrangellia Terrane Margin	Wrangell Mtns			Alaska					60.54.53	142.25.14
90SR06	142.2	0.5	0.5	Ar/Ar	Hornblende	Cooling 500°C	A	high-T isochron age	Roeske, S. M., Snee,, L. W. and Pavlis, T. L.	2003	2007	USGS, Denver Argon Laboratory	Southern Wrangellia Terrane Margin	Wrangell Mtns			Alaska					60.54.05	142.26.42
73AH279a	142.2	0.5	0.5	Ar/Ar	Hornblende	Cooling 500°C	A	plateau age	Roeske, S. M., Snee,, L. W. and Pavlis, T. L.	2003	2007	USGS, Denver Argon Laboratory	Southern Wrangellia Terrane Margin	Wrangell Mtns			Alaska					60.52.37	142.13.02
63AGz 213	142	5	5	Ar/Ar	Hornblende	Cooling 500°C	A		Grantz A., Jones D. L. and Lanphere M. A.	1967	2004	Ar analyses by M. Lanphere, K analyses by H. C. Whitehead			Plutonic	porphyritic hornblende microdiorite dike	Alaska										61.733	-144.05
91SR77d	142	4	4	Ar/Ar	Hornblende	Cooling 500°C	A	high-T isochron age	Roeske, S. M., Snee,, L. W. and Pavlis, T. L.	2003	2007	USGS, Denver Argon Laboratory	Southern Wrangellia Terrane Margin	Wrangell Mtns			Alaska					60.54.53	142.25.14
90SR07	141.9	0.6	0.6	Ar/Ar	Hornblende	Cooling 500°C	A	plateau age	Roeske, S. M., Snee,, L. W. and Pavlis, T. L.	2003	2007	USGS, Denver Argon Laboratory	Southern Wrangellia Terrane Margin	Wrangell Mtns			Alaska					60.54.07	142.26.44
91SR89a	141.9	0.4	0.4	Ar/Ar	Hornblende	Cooling 500°C	A	high-T isochron age	Roeske, S. M., Snee,, L. W. and Pavlis, T. L.	2003	2007	USGS, Denver Argon Laboratory	Southern Wrangellia Terrane Margin	Wrangell Mtns			Alaska					60.53.05	142.24.36
91SR69b	141.4	0.3	0.3	Ar/Ar	Hornblende	Cooling 500°C	A	plateau age	Roeske, S. M., Snee,, L. W. and Pavlis, T. L.	2003	2007	USGS, Denver Argon Laboratory	Southern Wrangellia Terrane Margin	Wrangell Mtns			Alaska					60.55.35	142.22.36
KN69-98-VI	141	8	8	K/Ar	Whole rock	Igneous cooling age	B	Age reported as 139 Ma; recalibrated to IUGS decay constants herein. K/Ar whole-rock method unreliable	Muller, J.E., Northcote, K.E. and Carlisle, D.	1974	1462	University of British Columbia, J. Harakal and W. White	Bonanza		Volcanic	rhyodacite;	British Columbia	Ashcroft	92I	9	15791	50.7303	128.378	543900	5620019	9	50.7305	128.376	544017	5619823	WRANGELLIA	Insular
63ALe 15	141	5	5		??				Grantz A., Jones D. L. and Lanphere M. A.	1967	2004	Ar analyses by M. Lanphere, K analyses by H. C. Whitehead			Plutonic	granodiorite	Alaska										61.5375	-143.705
91SR59a	140.5	0.3	0.3	Ar/Ar	Hornblende	Cooling 500°C	A	high-T isochron age	Roeske, S. M., Snee,, L. W. and Pavlis, T. L.	2003	2007	USGS, Denver Argon Laboratory	Southern Wrangellia Terrane Margin	Wrangell Mtns			Alaska					60.57.16	142.22.48
91SR84b	140.5	0.3	0.3	Ar/Ar	Hornblende	Cooling 500°C	A	high-T isochron age	Roeske, S. M., Snee,, L. W. and Pavlis, T. L.	2003	2007	USGS, Denver Argon Laboratory	Southern Wrangellia Terrane Margin	Wrangell Mtns			Alaska					60.54.25	142.25.04
91SR106d	139.2	1.2	1.2	Ar/Ar	Hornblende	Cooling 500°C	A	high-T isochron age	Roeske, S. M., Snee,, L. W. and Pavlis, T. L.	2003	2007	USGS, Denver Argon Laboratory	Southern Wrangellia Terrane Margin	Wrangell Mtns			Alaska					61.01.48	142.53.53
H-W Feeder Zone	138	10	10	K/Ar	Whole rock	Igneous cooling age	B	K/Ar whole-rock method unreliable	Juras, S.J.	1987	1325	University of British Columbia, J. Harakal and K. Scott	H-W stringer zone		Volcanic	hydrothermally altered andesite, fsp porphyritic	British Columbia	Alberni	92F	12	15433	49.5698	125.581	313360	5494003	10	49.57	125.58	313459	5493802	WRANGELLIA	Insular
PSM97-004	138	3	3	U/Pb	Zircon	Detrital	B	Spot 31.1, %discordance not reported, no plot, no data for other ages (cannot assess relative concordance). Age is 206Pb/238U age	Mahoney, J.B., Mustard, P.S., Haggart, J.W., Friedman, R.M., Fanning, C.M. and McNicoll, V.J.	1999	1579	Australian National University, Canberra; M. Fanning	DeCourcy Formation, Nanaimo Group		Sedimentary	not reported	British Columbia	Vancouver	92G	4	16919	49.15	123.8	441662	5444439	10	49.1502	123.799	441759	5444239	WRANGELLIA	Insular
Welsh 1	138			Ar/Ar	Hornblende	Cooling 500°C	A		Welsh, T. F.	1986	2006	Princeton					Alaska
KN69-8	137	8	8	K/Ar	Whole rock	Igneous cooling age	B	Age reported as 135 Ma (mean of 2 runs); recalibrated to IUGS decay constants herein. K/Ar whole-rock method unreliable.	Muller, J.E., Northcote, K.E. and Carlisle, D.	1974	1462	University of British Columbia, J. Harakal and W. White	Bonanza		Volcanic	rhyodacite;	British Columbia	Ashcroft	92I	16	15790	50.7853	128.427	540417	5626107	9	50.7855	128.425	540534	5625911	WRANGELLIA	Insular
HFB-95-36	136	3	3	U/Pb	Zircon	Detrital	B	Fraction B2 , 9.33% discordant. Age is 206Pb/238U age.	Mahoney, J.B., Mustard, P.S., Haggart, J.W., Friedman, R.M., Fanning, C.M. and McNicoll, V.J.	1999	1579	Geological Survey of Canada, V. McNicoll	Longarm Formation, Queen Charlotte basin		Sedimentary	not reported	British Columbia	Graham Island	103F	1	16803	53.1304	132.147	690850	5890575	8	53.1306	132.146	690970	5890391	WRANGELLIA	Insular
89SR88a	135.6	0.4	0.4	Ar/Ar	Hornblende	Cooling 500°C	A		Roeske S. M., Pavlis T. L., Snee L. W. and Sisson V. B.	1992	2005	USGS Denver					Alaska										61.18.25	144.13.10
RMF89-18	135	1	2	U/Pb	Zircon	Igneous crystallization age	A	4 fractions, concordant to slightly discordant, colinear. Age is lower intercept of regression through all (MSWD=0.72). Poorly constrained upper intercept (inheritance) at 869 +653/-541 Ma.	Friedman, R.M. and Armstrong, R.L.	1995	1505	University of British Columbia; R. Friedman and R. Armstrong	Goat Lake diorite, Coast Plutonic Complex		Plutonic	hornblende diorite	British Columbia	Bute Inlet	92K	1	16162	50.0965	124.221	412642	5550073	10	50.0967	124.22	412740	5549872	WRANGELLIA	Coast
V8	133	10	10	K/Ar	Hornblende	Cooling 500°C	A		Isachsen, C.E.	1987	1441	University of British Columbia; J. Harakal and K. Scott	Wark diorite		Plutonic	diorite	British Columbia	Victoria	92B	12	16293	48.5648	123.566	458219	5379235	10	48.565	123.565	458315	5379036	WRANGELLIA	Insular
NOREX-1A	132	7	7	K/Ar	Hornblende	Cooling 500°C	A	Age reported as 129 Ma; recalibrated herein to IUGS constants (S&J 1977)	Wanless, R.K., Stevens, R.D., Lachance, G.R. and Delabio, R.N.	1973	102	Geological Survey of Canada (Ottawa); Lab ID 72-20	dyke		Volcanic	feldspar porphyry with andesine porphyroblasts	British Columbia	Alberni	92F	3	13501	49.0498	125.435	322101	5435848	10	49.05	125.433	322200	5435647	WRANGELLIA	Insular
RMF89-13	132	4	4	U/Pb	Zircon	Igneous crystallization age	A	3 fractions, clustered and overlapping just with error ellipses just touching concordia, minor Pb-loss. Age is weighted mean Pb/Pb age.	Friedman, R.M. and Armstrong, R.L.	1995	1505	University of British Columbia; R. Friedman and R. Armstrong	Quatam pluton, Coast Plutonic Complex		Plutonic	hornblende diorite	British Columbia	Bute Inlet	92K	7	16164	50.3448	124.751	375383	5578438	10	50.345	124.75	375482	5578236	WRANGELLIA	Coast
PSM97-001	132	2	2	U/Pb	Zircon	Detrital	B	Spot 25.1, %discordance not reported, no plot, no data for other ages (cannot assess relative concordance). Age is 206Pb/238U age	Mahoney, J.B., Mustard, P.S., Haggart, J.W., Friedman, R.M., Fanning, C.M. and McNicoll, V.J.	1999	1579	Australian National University, Canberra; M. Fanning	Protection Formation, Nanaimo Group		Sedimentary	not reported	British Columbia	Vancouver	92G	4	16963	49.1456	123.787	442634	5443941	10	49.1458	123.785	442731	5443741	WRANGELLIA	Insular
E Sechelt	127	8	8	K/Ar	Hornblende	Cooling 500°C	A		Friedman, R.M. and Armstrong, R.L.	1995	1505	University of British Columbia; J. Harakal and D. Runkle	East Sechelt quartz diorite, Coast Plutonic Complex		Plutonic	hornblende-biotite quartz diorite/tonalite	British Columbia	Vancouver	92G	12	16187	49.6148	123.68	450900	5496029	10	49.615	123.678	450997	5495828	WRANGELLIA	Coast
PSM97-001	127	4	4	U/Pb	Zircon	Detrital	B	Spot 30.1, %discordance not reported, no plot, no data for other ages (cannot assess relative concordance). Age is 206Pb/238U age	Mahoney, J.B., Mustard, P.S., Haggart, J.W., Friedman, R.M., Fanning, C.M. and McNicoll, V.J.	1999	1579	Australian National University, Canberra; M. Fanning	Protection Formation, Nanaimo Group		Sedimentary	not reported	British Columbia	Vancouver	92G	4	16968	49.1456	123.787	442634	5443941	10	49.1458	123.785	442731	5443741	WRANGELLIA	Insular
96MK146	126.8	5.9	5.9	U/Pb	Zircon	Detrital	B	Spot 1.1, %discordance not reported, no plot, no data for other ages (cannot assess relative concordance). Age is 206Pb/238U age	Mahoney, J.B., Mustard, P.S., Haggart, J.W., Friedman, R.M., Fanning, C.M. and McNicoll, V.J.	1999	1579	Australian National University, Canberra; M. Fanning	Ventura Mamber, Midnight Peak Formation, Nanaimo Group		Sedimentary	not reported	British Columbia	Vancouver	92G	4	16840	49.16	123.75	445319	5445513	10	49.1602	123.749	445416	5445313	WRANGELLIA	Insular
RMF89-16	126	4	4	U/Pb	Zircon	Igneous crystallization age	A	3 fractions, plot on or just below concordia between 120-123 Ma (Pb-loss?) Age is weighted mean Pb/Pb age, which overlap with Pb/U agse for the most concordant fraction.	Friedman, R.M. and Armstrong, R.L.	1995	1505	University of British Columbia; R. Friedman and R. Armstrong	Malispina pluton, Coast Plutonic Complex		Plutonic	biotite granodiorite	British Columbia	Bute Inlet	92K	2	16165	50.0415	124.83	368983	5544847	10	50.0417	124.828	369082	5544646	WRANGELLIA	Coast
63AGz 162	126	4	4	Ar/Ar	Biotite	Cooling 280°C	A		Grantz A., Jones D. L. and Lanphere M. A.	1967	2004	Ar analyses by M. Lanphere, K analyses by H. C. Whitehead			Plutonic	biotite granodiorite											62.066	-144.573
Shell 7	125	0	0	K/Ar	Whole rock	Igneous cooling age	B	K/Ar whole-rock method unreliable	Shell		1485	unknown			Plutonic	Plutonic, 3 different localities;	British Columbia	Nootka Sound	92E	16	15871	49.7498	126.251	697987	5514438	9	49.75	126.25	698099	5514246	WRANGELLIA	Insular
96MK146	125	3.7	3.7	U/Pb	Zircon	Detrital	B	Spot 39.1, %discordance not reported, no plot, no data for other ages (cannot assess relative concordance). Age is 206Pb/238U age	Mahoney, J.B., Mustard, P.S., Haggart, J.W., Friedman, R.M., Fanning, C.M. and McNicoll, V.J.	1999	1579	Australian National University, Canberra; M. Fanning	Ventura Mamber, Midnight Peak Formation, Nanaimo Group		Sedimentary	not reported	British Columbia	Vancouver	92G	4	16878	49.16	123.75	445319	5445513	10	49.1602	123.749	445416	5445313	WRANGELLIA	Insular
MVM-90-101	123.9	1.7	1.7	U/Pb	Zircon	Detrital	A	Fraction B , 1.27% discordant (between U-Pb ages). Age is 206Pb/238U age.	Mustard, P.S., Parrish, R.R. and McNicoll, V.	1995	1519	Geological Survey of Canada (Ottawa); R. Parrish and V. McNicoll	Extension Formation, Nanaimo Group		Sedimentary	basal pebble conglomerate, chert and volcanic clasts abundant in a coarse-grained lithic wacke matrix	British Columbia	Vancouver	92G	4	16112	49.1356	123.938	431550	5442950	10	49.1357	123.937	431647	5442750	WRANGELLIA	Insular
E-63-4	123.8	35	35	K/Ar	Biotite	Cooling 280°C	B	K2O<5%; biotite was likely altered. Age reported as 121 Ma; recalibrated herein to IUGS constants (S&J 1977). No correction for atmospheric argon.	Wanless, R.K., Stevens, R.D., Lachance, G.R. and Rimsaite, J.Y.H.	1966	97	Geological Survey of Canada (Ottawa); Lab ID 64-3	cuts skarn related to 64-2 intrusion;		Volcanic	composite of 2 samples - grey feldspar porphyry dyke	British Columbia	Alberni	92F	3	13448	49.0498	125.435	322101	5435848	10	49.05	125.433	322200	5435647	WRANGELLIA	Insular
11324	123.4	0.6	0.6	Ar/Ar	Hornblende	Cooling 500°C	A	Magmatic age	Bittenbender, P.E., Bean, K.W., Kurtak, J. M.and Deininger, J., Jr.	2007	2001	University of Alaska, Fairbanks; P. Layer, J. Drake		Alaska Range	Plutonic	hornblende clinopyroxenite	Alaska										63.2342	-145.089
10810	123.4	1.3	1.3	Ar/Ar	Hornblende	Cooling 500°C	A	Magmatic age	Bittenbender, P.E., Bean, K.W., Kurtak, J. M.and Deininger, J., Jr.	2007	2001	University of Alaska, Fairbanks; P. Layer, J. Drake		Alaska Range	Plutonic	pyroxene hornblendite	Alaska										63.1293	-145.482
10240	123.3	1.3	1.3	Ar/Ar	Biotite	Cooling 280°C	A	Minimum magmatic age, partially reset by an alteration event	Bittenbender, P.E., Bean, K.W., Kurtak, J. M.and Deininger, J., Jr.	2007	2001	University of Alaska, Fairbanks; P. Layer, J. Drake		Alaska Range	Plutonic	Olivine pyroxenite	Alaska										63.2001	-144.876
PB03-01	123.2	1.1	1.1	Ar/Ar	Biotite	Cooling 280°C	A	Good magmatic age	Bittenbender, P.E., Bean, K.W., Kurtak, J. M.and Deininger, J., Jr.	2007	2001	University of Alaska, Fairbanks; P. Layer, J. Drake		Alaska Range	Plutonic	biotite diorite	Alaska										63.1341	-145.471
5725A5	123.13	0.77	0.77	Ar/Ar	Hbl	Cooling 500°C	A	6 steps 95.2% 39Ar release MSWD=1.5, n=6	Greene, A.R., Scoates, J.S., Weis, D, Israel, S., Nixon, G.T., Katvala, E.C.	2008	2000	University of British Columbia; T. Ullrich	Nikolai Formation	Alaska Range	Volcanic	hornblende andesite porphyry	Alaska							555533	7002016	6
11200	123.1	0.6	0.6	Ar/Ar	Biotite	Cooling 280°C	A	Magmatic age	Bittenbender, P.E., Bean, K.W., Kurtak, J. M.and Deininger, J., Jr.	2007	2001	University of Alaska, Fairbanks; P. Layer, J. Drake		Alaska Range	Plutonic	Olivine-biotite-hornblende lherzolite	Alaska										63.1628	-144.718
Salt	123	7	7	U/Pb	Zircon	Igneous crystallization age	A	2 slightly-discordant overlapping fractions; age is range of U/Pb ages (min) and Pb/Pb ages (max).	Isachsen, C.E. and Armstrong, R.L.	0	1474	University of British Columbia; C. Isachsen	Coast Plutonic Complex		Plutonic	bi qtz monzonite near granodiorite, bi partly altered to epidote	British Columbia	Alberni	92F	16	15980	49.7848	124.251	409918	5515458	10	49.785	124.25	410016	5515257	WRANGELLIA	Coast
MEKA 67-1	122.1	6	6	K/Ar	Biotite	Cooling 280°C	A	Reanalyzed as 110 Ma, see Wanless et al. (1973, GSC #72-9). Age reported as 120 Ma; recalibrated herein to IUGS constants (S&J 1977)	Wanless, R.K., Stevens, R.D., Lachance, G.R. and Delabio, R.N.	1970	100	Geological Survey of Canada (Ottawa); Lab ID 67-39	Pocahontas Stock; see map 17-1968, GSC p 68-50;		Plutonic	granodiorite, hornblende - biotite; 'granite'	British Columbia	Alberni	92F	9	13483	49.7235	124.41	398392	5508840	10	49.7237	124.408	398490	5508640	WRANGELLIA	Insular
D40-5-58	122	6	6	K/Ar	Whole Rock	Metamorphic Cooling Age	B	K/Ar whole-rock method unreliable	Sinclair, A.J., Bentzen, A. and McLeod, J.A.	1979	85	University of British Columbia	Nicolai Greenstone		Volcanic	Greenstone massive greenstone at White River native Cu deposit. Age likely reflects metamorphism/alteration	Yukon	Kluane Lake	115F	15	710	61.783	140.815	509737	6850020	7	61.7833	140.813	509847	6849855	WRANGELLIA
MEKA 74-12	122	5	5	K/Ar	Hornblende	Cooling 500°C	A		Stevens, R.D., Delabio, R.N. and Lachance, G.R.	1982	91	Geological Survey of Canada (Ottawa); Lab ID 80-18	Stock, Rock Bay intrusion		Plutonic	Granodiorite, fine grained	British Columbia	Bute Inlet	92K	3	13428	50.2387	125.236	340522	5567559	10	50.2388	125.235	340621	5567357	WRANGELLIA	Coast
GS-33-66	122	12	12	K/Ar	Hornblende	Cooling 500°C	A	Age reported as 119.4 Ma; recalibrated herein to IUGS decay constants	Young, I.F.	1981	1145	Kreuger Enterprises Ltd., Cambridge, Mass., for Pan-american Petroleum Corporation	Syntectonic pluton		Plutonic	Quartz diorite	British Columbia	Graham Island	103F	10	12143	53.5359	132.955	635553	5933831	8	53.5362	132.953	635674	5933650	WRANGELLIA	Insular
Rd 70-40161	121.6	5	5	K/Ar	Hornblende	Cooling 500°C	A	Age reported as 119 Ma; recalibrated herein to IUGS constants (S&J 1977)	Wanless, R.K., Stevens, R.D., Lachance, G.R. and Delabio, R.N.	1978	104	Geological Survey of Canada (Ottawa); Lab ID 76-33	Coast Plutonic Complex		Plutonic	Hornblende - biotite granodiorite	British Columbia	Vancouver	92G	12	13571	49.5203	123.691	449997	5485530	10	49.5205	123.689	450094	5485329	WRANGELLIA	Coast
96MK146	121.3	4.2	4.2	U/Pb	Zircon	Detrital	B	Spot 30.1, %discordance not reported, no plot, no data for other ages (cannot assess relative concordance). Age is 206Pb/238U age	Mahoney, J.B., Mustard, P.S., Haggart, J.W., Friedman, R.M., Fanning, C.M. and McNicoll, V.J.	1999	1579	Australian National University, Canberra; M. Fanning	Ventura Mamber, Midnight Peak Formation, Nanaimo Group		Sedimentary	not reported	British Columbia	Vancouver	92G	4	16869	49.16	123.75	445319	5445513	10	49.1602	123.749	445416	5445313	WRANGELLIA	Insular
11048	121.2	0.3	0.3	Ar/Ar	Hornblende	Cooling 500°C	A	Magmatic age	Bittenbender, P.E., Bean, K.W., Kurtak, J. M.and Deininger, J., Jr.	2007	2001	University of Alaska, Fairbanks; P. Layer, J. Drake		Alaska Range	Plutonic	hornblendite	Alaska										63.2347	-145.089
10290	121.2	0.3	0.3	Ar/Ar	Hornblende	Cooling 500°C	A	Magmatic age	Bittenbender, P.E., Bean, K.W., Kurtak, J. M.and Deininger, J., Jr.	2007	2001	University of Alaska, Fairbanks; P. Layer, J. Drake		Alaska Range	Plutonic	hornblende-magnetite pyroxenite	Alaska										63.2135	-145.072
RD67.30235	120.4	1.2	1.2	Ar/Ar	Hornblende	Cooling 500°C	A	Plateau age; 83% gas release. Integrated age: 162.6 ±1.6 Ma.	Hunt, P.A. and Roddick, J.C.	1996	1001	Geological Survey of Canada (Ottawa); Lab ID 95-5	Coast Plutonic Complex		Plutonic	coarse-grained hornblende-rich diorite	British Columbia	Queens Sound	102P	9	13810	51.5914	128.141	559535	5715947	9	51.6054	128.139	559650	5715750	WRANGELLIA	Coast
10913	120.4	1.2	1.2	Ar/Ar	Hornblende	Cooling 500°C	A	Minimum magmatic age	Bittenbender, P.E., Bean, K.W., Kurtak, J. M.and Deininger, J., Jr.	2007	2001	University of Alaska, Fairbanks; P. Layer, J. Drake		Alaska Range	Plutonic	hornblende clinopyroxenite	Alaska										63.2798	-145.251
4135B2	120	14	14	K/Ar	Whole rock	Igneous cooling age	B	K/Ar whole-rock method unreliable. Age reported as 118 Ma; recalibrated herein to IUGS decay constants	Young, I.F.	1981	1145	Shell Development Corporation, Houston, Texas	Near middle of 165 + m section of flow and pyroclastic		Volcanic	Basalt porphyry and altered basalt	British Columbia	Moresby Island	103B	15	12135	52.7566	130.924	370185	5846932	9	52.7568	130.922	370292	5846735	WRANGELLIA	Insular
Rock	120	2.5	2.5	U/Pb	Zircon	Igneous crystallization age	A	2 concordant overlapping fractions; age is range of U/Pb ages and error.	Isachsen, C.E. and Armstrong, R.L.	0	1474	University of British Columbia; C. Isachsen	Coast Plutonic Complex; Rock Bay Pluton;		Plutonic	biotite < hornblende granodiorite	British Columbia	Bute Inlet	92K	6	15983	50.329	125.485	323115	5578163	10	50.3292	125.484	323214	5577961	WRANGELLIA	Insular
Quarry Bay	120	3	3	U/Pb	Zircon	Crystallization estimate	A	3 fractions, error elipses dispersed just below concordia. Age is weighted mean Pb/Pb age.	Friedman, R.M. and Armstrong, R.L.	1995	1505	University of British Columbia; R. Friedman and R. Armstrong	Quarry Bay intrusion, Coast Plutonic Complex		Plutonic	biotite granodiorite	British Columbia	Alberni	92F	9	16167	49.6532	124.13	418456	5500681	10	49.6533	124.128	418554	5500480	WRANGELLIA	Coast
10910	119.7	0.6	0.6	Ar/Ar	Biotite	Cooling 280°C	A	Minimum magmatic age	Bittenbender, P.E., Bean, K.W., Kurtak, J. M.and Deininger, J., Jr.	2007	2001	University of Alaska, Fairbanks; P. Layer, J. Drake		Alaska Range	Plutonic	hornblende-biotite gabbronorite	Alaska										63.1931	-144.916
PC-6	119	8	8	K/Ar	Hornblende	Cooling 500°C	A	Age reported as 117 Ma; recalibrated herein to IUGS decay constants	Christopher, P.A., White, W.H. and Harakal, J.E.	1972	8	University of British Columbia	Kluane Range Intrusions		Plutonic	Gabbro	Yukon	Kluane Lake	115G	6	951	61.3677	139.421	584397	6804769	7	61.368	139.419	584507	6804604	WRANGELLIA
PSM97-001	119	3	3	U/Pb	Zircon	Detrital	B	Spot 1.1, %discordance not reported, no plot, no data for other ages (cannot assess relative concordance). Age is 206Pb/238U age	Mahoney, J.B., Mustard, P.S., Haggart, J.W., Friedman, R.M., Fanning, C.M. and McNicoll, V.J.	1999	1579	Australian National University, Canberra; M. Fanning	Protection Formation, Nanaimo Group		Sedimentary	not reported	British Columbia	Vancouver	92G	4	16939	49.1456	123.787	442634	5443941	10	49.1458	123.785	442731	5443741	WRANGELLIA	Insular
96MK146	118.8	5.9	5.9	U/Pb	Zircon	Detrital	B	Spot 4.1, %discordance not reported, no plot, no data for other ages (cannot assess relative concordance). Age is 206Pb/238U age	Mahoney, J.B., Mustard, P.S., Haggart, J.W., Friedman, R.M., Fanning, C.M. and McNicoll, V.J.	1999	1579	Australian National University, Canberra; M. Fanning	Ventura Mamber, Midnight Peak Formation, Nanaimo Group		Sedimentary	not reported	British Columbia	Vancouver	92G	4	16843	49.16	123.75	445319	5445513	10	49.1602	123.749	445416	5445313	WRANGELLIA	Insular
10994	118.8	1.2	1.2	Ar/Ar	Hornblende	Cooling 500°C	B	Alteration age	Bittenbender, P.E., Bean, K.W., Kurtak, J. M.and Deininger, J., Jr.	2007	2001	University of Alaska, Fairbanks; P. Layer, J. Drake		Alaska Range	Volcanic	hornblende biotite syenite	Alaska										63.2556	-145.329
Quarry Bay	118	8	8	K/Ar	Biotite	Cooling 280°C	A		Friedman, R.M. and Armstrong, R.L.	1995	1505	University of British Columbia; J. Harakal and D. Runkle	Quarry Bay intrusion, Coast Plutonic Complex		Plutonic	biotite granodiorite	British Columbia	Alberni	92F	9	16188	49.6532	124.13	418456	5500681	10	49.6533	124.128	418554	5500480	WRANGELLIA	Coast
MEKA 73-4	117.7	5	5	K/Ar	Hornblende	Cooling 500°C	A	Age reported as 115 Ma; recalibrated herein to IUGS constants (S&J 1977)	Wanless, R.K., Stevens, R.D., Lachance, G.R. and Delabio, R.N.	1978	104	Geological Survey of Canada (Ottawa); Lab ID 76-5	West Coast Crystalline Complex;		Plutonic	hornblende, plagioclase gneiss	British Columbia	Cape Flattery	92C	14	13539	48.8568	125.34	328345	5414178	10	48.857	125.339	328443	5413978	WRANGELLIA	Insular
96MK146	117.3	3.9	3.9	U/Pb	Zircon	Detrital	B	Spot 31.1, %discordance not reported, no plot, no data for other ages (cannot assess relative concordance). Age is 206Pb/238U age	Mahoney, J.B., Mustard, P.S., Haggart, J.W., Friedman, R.M., Fanning, C.M. and McNicoll, V.J.	1999	1579	Australian National University, Canberra; M. Fanning	Ventura Mamber, Midnight Peak Formation, Nanaimo Group		Sedimentary	not reported	British Columbia	Vancouver	92G	4	16870	49.16	123.75	445319	5445513	10	49.1602	123.749	445416	5445313	WRANGELLIA	Insular
MEKA 67-1	117.2	15	15	K/Ar	Hornblende	Cooling 500°C	A	Age reported as 114 Ma; recalibrated herein to IUGS constants (S&J 1977)	Wanless, R.K., Stevens, R.D., Lachance, G.R. and Delabio, R.N.	1973	102	Geological Survey of Canada (Ottawa); Lab ID 72-10	Pocahontas Stock; see map 17-1968, GSC p 68-50;		Plutonic	granodiorite, hornblende - biotite; 'granite'	British Columbia	Alberni	92F	9	13484	49.7235	124.41	398392	5508840	10	49.7237	124.408	398490	5508640	WRANGELLIA	Insular
PC-5	117	8	8	K/Ar	Hornblende	Cooling 500°C	A	Age reported as 115 Ma; recalibrated herein to IUGS decay constants	Christopher, P.A., White, W.H. and Harakal, J.E.	1972	8	University of British Columbia	Kluane Range Intrusions		Plutonic	Gabbro	Yukon	Kluane Lake	115G	6	110	61.3661	139.402	585401	6804614	7	61.3664	139.4	585511	6804449	WRANGELLIA
PSM97-001	117	2	2	U/Pb	Zircon	Detrital	B	Spot 50.1, %discordance not reported, no plot, no data for other ages (cannot assess relative concordance). Age is 206Pb/238U age	Mahoney, J.B., Mustard, P.S., Haggart, J.W., Friedman, R.M., Fanning, C.M. and McNicoll, V.J.	1999	1579	Australian National University, Canberra; M. Fanning	Protection Formation, Nanaimo Group		Sedimentary	not reported	British Columbia	Vancouver	92G	4	16989	49.1456	123.787	442634	5443941	10	49.1458	123.785	442731	5443741	WRANGELLIA	Insular
PSM97-004	117	3	3	U/Pb	Zircon	Detrital	B	Spot 34.1, %discordance not reported, no plot, no data for other ages (cannot assess relative concordance). Age is 206Pb/238U age	Mahoney, J.B., Mustard, P.S., Haggart, J.W., Friedman, R.M., Fanning, C.M. and McNicoll, V.J.	1999	1579	Australian National University, Canberra; M. Fanning	DeCourcy Formation, Nanaimo Group		Sedimentary	not reported	British Columbia	Vancouver	92G	4	16922	49.15	123.8	441662	5444439	10	49.1502	123.799	441759	5444239	WRANGELLIA	Insular
96MK146	116.6	9.2	9.2	U/Pb	Zircon	Detrital	B	Spot 5.1, %discordance not reported, no plot, no data for other ages (cannot assess relative concordance). Age is 206Pb/238U age	Mahoney, J.B., Mustard, P.S., Haggart, J.W., Friedman, R.M., Fanning, C.M. and McNicoll, V.J.	1999	1579	Australian National University, Canberra; M. Fanning	Ventura Mamber, Midnight Peak Formation, Nanaimo Group		Sedimentary	not reported	British Columbia	Vancouver	92G	4	16844	49.16	123.75	445319	5445513	10	49.1602	123.749	445416	5445313	WRANGELLIA	Insular
PSM97-004	116	2	2	U/Pb	Zircon	Detrital	B	Spot 37.1, %discordance not reported, no plot, no data for other ages (cannot assess relative concordance). Age is 206Pb/238U age	Mahoney, J.B., Mustard, P.S., Haggart, J.W., Friedman, R.M., Fanning, C.M. and McNicoll, V.J.	1999	1579	Australian National University, Canberra; M. Fanning	DeCourcy Formation, Nanaimo Group		Sedimentary	not reported	British Columbia	Vancouver	92G	4	16925	49.15	123.8	441662	5444439	10	49.1502	123.799	441759	5444239	WRANGELLIA	Insular
Rd 72-20519	115.7	4	4	K/Ar	Biotite	Cooling 280°C	A	Age reported as 113 Ma; recalibrated herein to IUGS constants (S&J 1977)	Wanless, R.K., Stevens, R.D., Lachance, G.R. and Delabio, R.N.	1978	104	Geological Survey of Canada (Ottawa); Lab ID 76-30	pluton, western Coast Plutonic Complex		Plutonic	Hornblende-biotite quartz monzonite, unfoliated	British Columbia	Bute Inlet	92K	2	13583	50.1743	124.891	365001	5559724	10	50.1745	124.889	365100	5559522	WRANGELLIA	Coast
MEKA 71-10	115.6	5	5	K/Ar	Hornblende	Cooling 500°C	A	Age reported as 112 Ma; recalibrated herein to IUGS constants (S&J 1977)	Wanless, R.K., Stevens, R.D., Lachance, G.R. and Delabio, R.N.	1974	103	Geological Survey of Canada (Ottawa); Lab ID 73-16	Island Intrusion;		Plutonic	biotite hornblende granodiorite	British Columbia	Bute Inlet	92K	6	13513	50.332	125.486	323066	5578499	10	50.3322	125.485	323165	5578297	WRANGELLIA	Insular
Rd 70-40161	115.4	4	4	K/Ar	Biotite	Cooling 280°C	A	Age reported as 113 Ma; recalibrated herein to IUGS constants (S&J 1977)	Wanless, R.K., Stevens, R.D., Lachance, G.R. and Delabio, R.N.	1978	104	Geological Survey of Canada (Ottawa); Lab ID 76-32	Coast Plutonic Complex		Plutonic	Hornblende - biotite granodiorite	British Columbia	Vancouver	92G	12	13570	49.5203	123.691	449997	5485530	10	49.5205	123.689	450094	5485329	WRANGELLIA	Coast
D40-5-213	115	6	6	K/Ar	Whole Rock	Metamorphic Cooling Age	B	K/Ar whole-rock method unreliable	Sinclair, A.J., Bentzen, A. and McLeod, J.A.	1979	85	University of British Columbia	Nicolai Greenstone		Volcanic	Greenstone massive greenstone at White River native Cu deposit. Age likely reflects metamorphism/alteration	Yukon	Kluane Lake	115F	15	709	61.783	140.815	509737	6850020	7	61.7833	140.813	509847	6849855	WRANGELLIA
WN-135-74	115	5	5	K/Ar	Hornblende	Cooling 500°C	A		Stevens, R.D., Delabio, R.N. and Lachance, G.R.	1982	92	Geological Survey of Canada (Ottawa)- GSC No: 81-73	Kluane Range intrusions		Plutonic	Hb-bt Granodiorite	Yukon	Kluane Lake	115F	9	268	61.6413	140.229	540871	6834468	7	61.6417	140.227	540981	6834303	WRANGELLIA
Sackinaw Lake	115	6	3	U/Pb	Zircon	Igneous crystallization age	A	3 fractions, concordant to slightly discordant, clustered just below concordia. Age is based on Pb/U ages, with upper error expanded to include weighted mean Pb/Pb age (121 ± 5Ma).	Friedman, R.M. and Armstrong, R.L.	1995	1505	University of British Columbia; R. Friedman and R. Armstrong	Sackinaw Lake granodiorite, Coast Plutonic Complex		Plutonic	hornblende-biotite tonalite	British Columbia	Vancouver	92G	12	16168	49.6448	123.966	430234	5499591	10	49.645	123.965	430332	5499390	WRANGELLIA	Coast
PSM97-001	115	3	3	U/Pb	Zircon	Detrital	B	Spot 19.1, %discordance not reported, no plot, no data for other ages (cannot assess relative concordance). Age is 206Pb/238U age	Mahoney, J.B., Mustard, P.S., Haggart, J.W., Friedman, R.M., Fanning, C.M. and McNicoll, V.J.	1999	1579	Australian National University, Canberra; M. Fanning	Protection Formation, Nanaimo Group		Sedimentary	not reported	British Columbia	Vancouver	92G	4	16957	49.1456	123.787	442634	5443941	10	49.1458	123.785	442731	5443741	WRANGELLIA	Insular
PSM97-004	115	4	4	U/Pb	Zircon	Detrital	B	Spot 48.1, %discordance not reported, no plot, no data for other ages (cannot assess relative concordance). Age is 206Pb/238U age	Mahoney, J.B., Mustard, P.S., Haggart, J.W., Friedman, R.M., Fanning, C.M. and McNicoll, V.J.	1999	1579	Australian National University, Canberra; M. Fanning	DeCourcy Formation, Nanaimo Group		Sedimentary	not reported	British Columbia	Vancouver	92G	4	16936	49.15	123.8	441662	5444439	10	49.1502	123.799	441759	5444239	WRANGELLIA	Insular
96MK146	114.8	4.5	4.5	U/Pb	Zircon	Detrital	B	Spot 22.1, %discordance not reported, no plot, no data for other ages (cannot assess relative concordance). Age is 206Pb/238U age	Mahoney, J.B., Mustard, P.S., Haggart, J.W., Friedman, R.M., Fanning, C.M. and McNicoll, V.J.	1999	1579	Australian National University, Canberra; M. Fanning	Ventura Mamber, Midnight Peak Formation, Nanaimo Group		Sedimentary	not reported	British Columbia	Vancouver	92G	4	16861	49.16	123.75	445319	5445513	10	49.1602	123.749	445416	5445313	WRANGELLIA	Insular
W Redonda Island	114	2	2	U/Pb	Zircon	Igneous crystallization age	A	3 fractions, concordant and fully overlapping. Age based on Pb/U and Pb/Pb ages.	Friedman, R.M. and Armstrong, R.L.	1995	1505	University of British Columbia; R. Friedman and R. Armstrong	West Redonda diorite, Coast Plutonic Complex		Plutonic	hornblende diorite	British Columbia	Bute Inlet	92K	2	16169	50.2415	124.818	370359	5567063	10	50.2417	124.817	370458	5566861	WRANGELLIA	Coast
E Sechelt	114	1	1	U/Pb	Zircon	Igneous crystallization age	A	3 fractions, concordant and overlapping. Age based on Pb/U ages.	Friedman, R.M. and Armstrong, R.L.	1995	1505	University of British Columbia; R. Friedman and R. Armstrong	East Sechelt quartz diorite, Coast Plutonic Complex		Plutonic	hornblende-biotite quartz diorite/tonalite	British Columbia	Vancouver	92G	12	16170	49.6148	123.68	450900	5496029	10	49.615	123.678	450997	5495828	WRANGELLIA	Coast
Sackinaw Lake	114	8	8	K/Ar	Biotite	Cooling 280°C	A		Friedman, R.M. and Armstrong, R.L.	1995	1505	University of British Columbia; J. Harakal and D. Runkle	Sackinaw Lake granodiorite, Coast Plutonic Complex		Plutonic	hornblende-biotite tonalite	British Columbia	Vancouver	92G	12	16189	49.6448	123.966	430234	5499591	10	49.645	123.965	430332	5499390	WRANGELLIA	Coast
MEKA 67-3	113.9	6	6	K/Ar	Biotite	Cooling 280°C	A	Age reported as 109 Ma; recalibrated herein to IUGS constants (S&J 1977)	Wanless, R.K., Stevens, R.D., Lachance, G.R. and Delabio, R.N.	1973	102	Geological Survey of Canada (Ottawa); Lab ID 72-14	"East Stock" - map 17-1968, GSC p. 68-50;		Plutonic	granodiorite, biotite - hornblende	British Columbia	Alberni	92F	9	13497	49.6318	124.304	405819	5498512	10	49.632	124.303	405917	5498312	WRANGELLIA	Insular
MEKA 67-1	113.9	5	5	K/Ar	Biotite	Cooling 280°C	A	Age reported as 110 Ma; recalibrated herein to IUGS constants (S&J 1977)	Wanless, R.K., Stevens, R.D., Lachance, G.R. and Delabio, R.N.	1973	102	Geological Survey of Canada (Ottawa); Lab ID 72-9 (re-analysis of 67-39)	Pocahontas Stock; see map 17-1968, GSC p 68-50;		Plutonic	granodiorite, hornblende - biotite; 'granite'	British Columbia	Alberni	92F	9	13485	49.7235	124.41	398392	5508840	10	49.7237	124.408	398490	5508640	WRANGELLIA	Insular
Rd 72-20519	113.9	12	12	K/Ar	Hornblende	Cooling 500°C	A	Age reported as 111 Ma; recalibrated herein to IUGS constants (S&J 1977)	Wanless, R.K., Stevens, R.D., Lachance, G.R. and Delabio, R.N.	1978	104	Geological Survey of Canada (Ottawa); Lab ID 76-31	pluton, western Coast Plutonic Complex		Plutonic	Hornblende-biotite quartz monzonite, unfoliated	British Columbia	Bute Inlet	92K	2	13584	50.1743	124.891	365001	5559724	10	50.1745	124.889	365100	5559522	WRANGELLIA	Coast
MEKA 74-12	113	4	4	K/Ar	Biotite	Cooling 280°C	A		Stevens, R.D., Delabio, R.N. and Lachance, G.R.	1982	91	Geological Survey of Canada (Ottawa); Lab ID 80-17	Stock, Rock Bay intrusion		Plutonic	Granodiorite, fine grained	British Columbia	Bute Inlet	92K	3	13427	50.2387	125.236	340522	5567559	10	50.2388	125.235	340621	5567357	WRANGELLIA	Coast
Rd 72-30091	112.8	4	4	K/Ar	Biotite	Cooling 280°C	A	Age reported as 110 Ma; recalibrated herein to IUGS constants (S&J 1977)	Wanless, R.K., Stevens, R.D., Lachance, G.R. and Delabio, R.N.	1978	104	Geological Survey of Canada (Ottawa); Lab ID 76-28			Plutonic	qz monzonite, hornblende - biotite;	British Columbia	Bute Inlet	92K	6	13585	50.3211	125.442	326182	5577190	10	50.3213	125.44	326281	5576988	WRANGELLIA	Insular
WN-135-74	112	4	4	K/Ar	Biotite	Cooling 280°C	A		Stevens, R.D., Delabio, R.N. and Lachance, G.R.	1982	92	Geological Survey of Canada (Ottawa)- GSC No: 81-73	Kluane Range intrusions		Plutonic	Hb-bt Granodiorite	Yukon	Kluane Lake	115F	9	267	61.6413	140.229	540871	6834468	7	61.6417	140.227	540981	6834303	WRANGELLIA
PSM97-001	112	3	3	U/Pb	Zircon	Detrital	B	Spot 18.1, %discordance not reported, no plot, no data for other ages (cannot assess relative concordance). Age is 206Pb/238U age	Mahoney, J.B., Mustard, P.S., Haggart, J.W., Friedman, R.M., Fanning, C.M. and McNicoll, V.J.	1999	1579	Australian National University, Canberra; M. Fanning	Protection Formation, Nanaimo Group		Sedimentary	not reported	British Columbia	Vancouver	92G	4	16956	49.1456	123.787	442634	5443941	10	49.1458	123.785	442731	5443741	WRANGELLIA	Insular
Sackinaw Lake	111	8	8	K/Ar	Hornblende	Cooling 500°C	A		Friedman, R.M. and Armstrong, R.L.	1995	1505	University of British Columbia; J. Harakal and D. Runkle	Sackinaw Lake granodiorite, Coast Plutonic Complex		Plutonic	hornblende-biotite tonalite	British Columbia	Vancouver	92G	12	16190	49.6448	123.966	430234	5499591	10	49.645	123.965	430332	5499390	WRANGELLIA	Coast
PSM97-001	111	3	3	U/Pb	Zircon	Detrital	B	Spot 9.1, %discordance not reported, no plot, no data for other ages (cannot assess relative concordance). Age is 206Pb/238U age	Mahoney, J.B., Mustard, P.S., Haggart, J.W., Friedman, R.M., Fanning, C.M. and McNicoll, V.J.	1999	1579	Australian National University, Canberra; M. Fanning	Protection Formation, Nanaimo Group		Sedimentary	not reported	British Columbia	Vancouver	92G	4	16947	49.1456	123.787	442634	5443941	10	49.1458	123.785	442731	5443741	WRANGELLIA	Insular
PSM97-001	111	2	2	U/Pb	Zircon	Detrital	B	Spot 41.1, %discordance not reported, no plot, no data for other ages (cannot assess relative concordance). Age is 206Pb/238U age	Mahoney, J.B., Mustard, P.S., Haggart, J.W., Friedman, R.M., Fanning, C.M. and McNicoll, V.J.	1999	1579	Australian National University, Canberra; M. Fanning	Protection Formation, Nanaimo Group		Sedimentary	not reported	British Columbia	Vancouver	92G	4	16981	49.1456	123.787	442634	5443941	10	49.1458	123.785	442731	5443741	WRANGELLIA	Insular
PSM97-004	111	2	2	U/Pb	Zircon	Detrital	B	Spot 39.1, %discordance not reported, no plot, no data for other ages (cannot assess relative concordance). Age is 206Pb/238U age	Mahoney, J.B., Mustard, P.S., Haggart, J.W., Friedman, R.M., Fanning, C.M. and McNicoll, V.J.	1999	1579	Australian National University, Canberra; M. Fanning	DeCourcy Formation, Nanaimo Group		Sedimentary	not reported	British Columbia	Vancouver	92G	4	16927	49.15	123.8	441662	5444439	10	49.1502	123.799	441759	5444239	WRANGELLIA	Insular
RD67.30245	110.5	1.1	1.1	Ar/Ar	Biotite	Cooling 280°C	A	Plateau age; 85% gas release. Integrated age: 104.2 ±1.0 Ma.	Hunt, P.A. and Roddick, J.C.	1996	1001	Geological Survey of Canada (Ottawa); Lab ID 95-6	Pruth Bay Granite, Coast Plutonic Complex		Plutonic	leucocratic biotite granite	British Columbia	Queens Sound	102P	9	13811	51.6649	128.142	559355	5724117	9	51.6789	128.14	559470	5723920	WRANGELLIA	Coast
MVM-90-100	110.4	0.8	0.8	U/Pb	Zircon	Detrital	A	Fraction D , 1.78% discordant (between U-Pb ages). Age is 206Pb/238U age.	Mustard, P.S., Parrish, R.R. and McNicoll, V.	1995	1519	Geological Survey of Canada (Ottawa); R. Parrish and V. McNicoll	Protection Formation, Nanaimo Group		Sedimentary	chert-rich small-pebble conglomerate with ia coarse-grained lithic arenite matrix	British Columbia	Vancouver	92G	4	16119	49.1238	123.914	433350	5441620	10	49.124	123.912	433447	5441420	WRANGELLIA	Insular
RD67.50575	110.3	1.2	1.2	Ar/Ar	Hornblende	Cooling 500°C	A	Plateau age; 98% gas release. Integrated age: 109.3 ±1.3 Ma.	Hunt, P.A. and Roddick, J.C.	1996	1001	Geological Survey of Canada (Ottawa); Lab ID 95-8	Calvert Island Pluton, Coast Plutonic Complex		Plutonic	moderately-foliated mafic tonalite	British Columbia	Rivers Inlet	92M	12	13813	51.6478	127.97	571267	5722367	9	51.6619	127.968	571382	5722170	WRANGELLIA	Coast
RD67.50455	110.3	1.1	1.1	Ar/Ar	Hornblende	Cooling 500°C	A	Plateau age; 99% gas release. Integrated age: 110.1 ±1.2 Ma.	Hunt, P.A. and Roddick, J.C.	1996	1001	Geological Survey of Canada (Ottawa); Lab ID 95-7	Calvert Island Pluton, Coast Plutonic Complex		Plutonic	massive quartz monzodiorite	British Columbia	Queens Sound	102P	9	13812	51.651	128.029	567175	5722672	9	51.6651	128.027	567290	5722475	WRANGELLIA	Coast
MEKA 67-3	109	4	4	K/Ar	Biotite	Cooling 280°C	A	Age reported as 109 Ma; recalibrated herein to IUGS constants (S&J 1977)	Wanless, R.K., Stevens, R.D., Lachance, G.R. and Delabio, R.N.	1973	102	Geological Survey of Canada (Ottawa); Lab ID 72-13	"East Stock" - map 17-1968, GSC p. 68-50;		Plutonic	granodiorite, biotite - hornblende	British Columbia	Alberni	92F	9	13496	49.6318	124.304	405819	5498512	10	49.632	124.303	405917	5498312	WRANGELLIA	Insular
359-CAd-77-1	109	8	8	K/Ar	Hornblende	Cooling 500°C	B	No accompanying data; not released in annual GSC summary reports	Dodds, C.J. and Campbell, R.B.	1988	181	Geological Survey of Canada; K-Ar# 2964	Outpost Mountain pluton		Plutonic	diorite weakly-foliated medium-grained homogeneous biotite hornblende quartz diorite	Yukon	Kluane Lake	115G	1	1210	61.0047	138.455	637587	6765981	7	61.005	138.453	637698	6765817	WRANGELLIA
PSM97-001	109	2	2	U/Pb	Zircon	Detrital	B	Spot 3.1, %discordance not reported, no plot, no data for other ages (cannot assess relative concordance). Age is 206Pb/238U age	Mahoney, J.B., Mustard, P.S., Haggart, J.W., Friedman, R.M., Fanning, C.M. and McNicoll, V.J.	1999	1579	Australian National University, Canberra; M. Fanning	Protection Formation, Nanaimo Group		Sedimentary	not reported	British Columbia	Vancouver	92G	4	16941	49.1456	123.787	442634	5443941	10	49.1458	123.785	442731	5443741	WRANGELLIA	Insular
RD67.50371	108.7	1.1	1.1	Ar/Ar	Hornblende	Cooling 500°C	A	Plateau age; 99% gas release. Integrated age: 107.8 ±1.1 Ma.	Hunt, P.A. and Roddick, J.C.	1996	1001	Geological Survey of Canada (Ottawa); Lab ID 95-9	Fish Egg Pluton, Coast Plutonic Complex		Plutonic	moderately-foliated tonalite	British Columbia	Rivers Inlet	92M	12	13814	51.6888	127.882	577299	5727018	9	51.7029	127.88	577414	5726821	WRANGELLIA	Coast
WN-136-74	108	5	5	K/Ar	Biotite	Cooling 280°C	B		Stevens, R.D., Delabio, R.N. and Lachance, G.R.	1982	92	Geological Survey of Canada (Ottawa)- GSC No: 81-72			Metamorphic	Amphibolite	Yukon	Kluane Lake	115F	16	748	61.798	140.422	530471	6851813	7	61.7983	140.42	530580	6851648	WRANGELLIA
Rd 70-10059	108	5	5	K/Ar	Hornblende	Cooling 500°C	A	Age reported as 105 Ma; recalibrated herein to IUGS constants (S&J 1977)	Wanless, R.K., Stevens, R.D., Lachance, G.R. and Delabio, R.N.	1978	104	Geological Survey of Canada (Ottawa); Lab ID 76-26	plutons, southwestern Coast Plutonic Complex		Plutonic	qz diorite, unfoliated, fresh, hornblende-biotite	British Columbia	Bute Inlet	92K	12	13551	50.5986	125.764	304399	5608841	10	50.5988	125.763	304498	5608639	WRANGELLIA	Coast
359-CAd-77-1	108	4	4	K/Ar	Biotite	Cooling 280°C	B	No accompanying data; not released in annual GSC summary reports	Dodds, C.J. and Campbell, R.B.	1988	181	Geological Survey of Canada; K-Ar# 2963	Outpost Mountain pluton		Plutonic	diorite weakly-foliated medium-grained homogeneous biotite hornblende quartz diorite	Yukon	Kluane Lake	115G	1	1209	61.0047	138.455	637587	6765981	7	61.005	138.453	637698	6765817	WRANGELLIA
MV88-130	108	5	2	U/Pb	Zircon	Igneous crystallization age	A	3 fractions, plot on or near concordia at 105 - 107 Ma. Age is weighted mean Pb/Pb age, with lower error tightened to Pb/U age for fraction 1 (=minimum age)	Friedman, R.M. and Armstrong, R.L.	1995	1505	University of British Columbia; R. Friedman and R. Armstrong	Pitt Lake granodiorite, Coast Plutonic Complex		Plutonic	biotite granodiorite	British Columbia	Vancouver	92G	7	16175	49.4732	123.556	459695	5480206	10	49.4733	123.555	459791	5480005	WRANGELLIA	Coast
Rd 67-10540	107.6	5	5	K/Ar	Hornblende	Cooling 500°C	A	Age reported as 105 Ma; recalibrated herein to IUGS constants (S&J 1977)	Wanless, R.K., Stevens, R.D., Lachance, G.R. and Delabio, R.N.	1978	104	Geological Survey of Canada (Ottawa); Lab ID 76-18	pluton, Coast Plutonic Complex; map unit 3 GSC pap.68-1A,p37-41;		Plutonic	biotite hornblende quartz diorite, unfoliated	British Columbia	Rivers Inlet	92M	6	13549	51.2895	127.414	610562	5683212	9	51.2897	127.413	610677	5683015	WRANGELLIA	Coast
96MK146	107.6	5.1	5.1	U/Pb	Zircon	Detrital	B	Spot 33.1, %discordance not reported, no plot, no data for other ages (cannot assess relative concordance). Age is 206Pb/238U age	Mahoney, J.B., Mustard, P.S., Haggart, J.W., Friedman, R.M., Fanning, C.M. and McNicoll, V.J.	1999	1579	Australian National University, Canberra; M. Fanning	Ventura Mamber, Midnight Peak Formation, Nanaimo Group		Sedimentary	not reported	British Columbia	Vancouver	92G	4	16872	49.16	123.75	445319	5445513	10	49.1602	123.749	445416	5445313	WRANGELLIA	Insular
MEKA 71-10	107.3	10	10	K/Ar	Biotite	Cooling 280°C	A	Age reported as 105 Ma; recalibrated herein to IUGS constants (S&J 1977)	Wanless, R.K., Stevens, R.D., Lachance, G.R. and Delabio, R.N.	1974	103	Geological Survey of Canada (Ottawa); Lab ID 73-17	Island Intrusion;		Plutonic	biotite hornblende granodiorite	British Columbia	Bute Inlet	92K	6	13514	50.332	125.486	323066	5578499	10	50.3322	125.485	323165	5578297	WRANGELLIA	Insular
Rd 72-10077	107	4	4	K/Ar	Biotite	Cooling 280°C	A	Age reported as 104 Ma; recalibrated herein to IUGS constants (S&J 1977)	Wanless, R.K., Stevens, R.D., Lachance, G.R. and Delabio, R.N.	1978	104	Geological Survey of Canada (Ottawa); Lab ID 76-27	pluton, western Coast Plutonic Complex		Plutonic	granodiorite, biotite	British Columbia	Bute Inlet	92K	6	13578	50.2937	125.316	335008	5573848	10	50.2938	125.315	335107	5573646	WRANGELLIA	Coast
RD67.40657	106.5	1.3	1.3	Ar/Ar	Hornblende	Cooling 500°C	A	Plateau age; 99% gas release. Integrated age: 106.6 ±1.6 Ma.	Hunt, P.A. and Roddick, J.C.	1993	35	Geological Survey of Canada (Ottawa); Lab ID 93-12	basic phase of Fish Egg Pluton, Coast Plutonic Complex		Plutonic	coarse-grained tonalite	British Columbia	Rivers Inlet	92M	12	13759	51.709	127.633	594448	5729555	9	51.7083	127.632	594563	5729358	WRANGELLIA	Coast
Rd 72-30091	106.3	5	5	K/Ar	Hornblende	Cooling 500°C	A	Age reported as 104 Ma; recalibrated herein to IUGS constants (S&J 1977)	Wanless, R.K., Stevens, R.D., Lachance, G.R. and Delabio, R.N.	1978	104	Geological Survey of Canada (Ottawa); Lab ID 76-29			Plutonic	qz monzonite, hornblende - biotite;	British Columbia	Bute Inlet	92K	6	13586	50.3211	125.442	326182	5577190	10	50.3213	125.44	326281	5576988	WRANGELLIA	Insular
KN69-10	105	8	8	K/Ar	Whole rock	Igneous cooling age	B	Age reported as 103 Ma; recalibrated to IUGS decay constants herein. K/Ar whole-rock method unreliable.	Muller, J.E., Northcote, K.E. and Carlisle, D.	1974	1462	University of British Columbia, J. Harakal and W. White	Bonanza		Volcanic	rhyodacite;	British Columbia	Ashcroft	92I	9	15786	50.722	128.382	543613	5619090	9	50.7222	128.381	543730	5618894	WRANGELLIA	Insular
Shell 9	104	0	0	K/Ar	Whole rock	Igneous cooling age	B	K/Ar whole-rock method unreliable	Shell		1485	unknown			Plutonic	Plutonic, 3 different localities;	British Columbia	Nootka Sound	92E	16	15873	49.7498	126.251	697987	5514438	9	49.75	126.25	698099	5514246	WRANGELLIA	Insular
PSM97-004	104	1	1	U/Pb	Zircon	Detrital	B	Spot 21.1, %discordance not reported, no plot, no data for other ages (cannot assess relative concordance). Age is 206Pb/238U age	Mahoney, J.B., Mustard, P.S., Haggart, J.W., Friedman, R.M., Fanning, C.M. and McNicoll, V.J.	1999	1579	Australian National University, Canberra; M. Fanning	DeCourcy Formation, Nanaimo Group		Sedimentary	not reported	British Columbia	Vancouver	92G	4	16910	49.15	123.8	441662	5444439	10	49.1502	123.799	441759	5444239	WRANGELLIA	Insular
Rd 67-10540	103.8	4	4	K/Ar	Biotite	Cooling 280°C	A	Age reported as 101 Ma; recalibrated herein to IUGS constants (S&J 1977)	Wanless, R.K., Stevens, R.D., Lachance, G.R. and Delabio, R.N.	1978	104	Geological Survey of Canada (Ottawa); Lab ID 76-17	pluton, Coast Plutonic Complex; map unit 3 GSC pap.68-1A,p37-41;		Plutonic	biotite hornblende quartz diorite, unfoliated	British Columbia	Rivers Inlet	92M	6	13548	51.2895	127.414	610562	5683212	9	51.2897	127.413	610677	5683015	WRANGELLIA	Coast
RD67.70073	103.7	1	1	Ar/Ar	Biotite	Cooling 280°C	A	Plateau age; 93% gas release. Integrated age: 101.7 ±1.1 Ma.	Hunt, P.A. and Roddick, J.C.	1993	35	Geological Survey of Canada (Ottawa); Lab ID 93-11	Fish Egg Pluton, Coast Plutonic Complex		Plutonic	coarse-grained diorite	British Columbia	Rivers Inlet	92M	12	13758	51.7162	127.75	586364	5730218	9	51.715	127.748	586479	5730021	WRANGELLIA	Coast
Shell 8	103	0	0	K/Ar	Whole rock	Igneous cooling age	B	K/Ar whole-rock method unreliable	Shell		1485	unknown			Plutonic	Plutonic, 3 different localities;	British Columbia	Nootka Sound	92E	16	15872	49.7498	126.251	697987	5514438	9	49.75	126.25	698099	5514246	WRANGELLIA	Insular
SAA-67-436	102.3	6	6	K/Ar	Hornblende	Cooling 500°C	A	Age reported as 100 Ma; recalibrated herein to IUGS constants (S&J 1977)	Wanless, R.K., Stevens, R.D., Lachance, G.R. and Delabio, R.N.	1970	100	Geological Survey of Canada (Ottawa); Lab ID 67-27	Map unit F, GSC Map 9-1966, GSC Paper 66-25, Coast Plutonic Cplx		Plutonic	Biotite pyroxene hornblende gabbro	British Columbia	Laredo Sound	103A	1	11586	52.106	128.289	548684	5773064	9	52.1062	128.287	548799	5772868	WRANGELLIA	Coast
SFR88-45-10-2	102	8	8	K/Ar	Whole rock	Igneous cooling age	B	K/Ar whole-rock method unreliable	Massey, N.W.D.	1992	1524	University of British Columbia; J. Harakal	?		Plutonic	hornblende-feldspar porphyry	British Columbia	Alberni	92F	1	16314	49.0742	124.354	401121	5436584	10	49.0744	124.353	401218	5436384	WRANGELLIA	Insular
Rd 70-30360	101.8	4.6	4.6	K/Ar	Hornblende	Cooling 500°C	A	Age reported as 99.4 Ma; recalibrated herein to IUGS constants (S&J 1977)	Wanless, R.K., Stevens, R.D., Lachance, G.R. and Delabio, R.N.	1978	104	Geological Survey of Canada (Ottawa); Lab ID 76-35	pluton, western Coast Plutonic Complex		Plutonic	Hornblende - biotite quartz diorite	British Columbia	Bute Inlet	92K	6	13564	50.4237	125.061	353594	5587767	10	50.4238	125.06	353693	5587565	WRANGELLIA	Coast
Rd 70-10059	101.8	3.7	3.7	K/Ar	Biotite	Cooling 280°C	A	Age reported as 99.3 Ma; recalibrated herein to IUGS constants (S&J 1977)	Wanless, R.K., Stevens, R.D., Lachance, G.R. and Delabio, R.N.	1978	104	Geological Survey of Canada (Ottawa); Lab ID 76-25	plutons, southwestern Coast Plutonic Complex		Plutonic	qz diorite, unfoliated, fresh, hornblende-biotite	British Columbia	Bute Inlet	92K	12	13550	50.5986	125.764	304399	5608841	10	50.5988	125.763	304498	5608639	WRANGELLIA	Coast
PSM97-001	101	2	2	U/Pb	Zircon	Detrital	B	Spot 15.1, %discordance not reported, no plot, no data for other ages (cannot assess relative concordance). Age is 206Pb/238U age	Mahoney, J.B., Mustard, P.S., Haggart, J.W., Friedman, R.M., Fanning, C.M. and McNicoll, V.J.	1999	1579	Australian National University, Canberra; M. Fanning	Protection Formation, Nanaimo Group		Sedimentary	not reported	British Columbia	Vancouver	92G	4	16953	49.1456	123.787	442634	5443941	10	49.1458	123.785	442731	5443741	WRANGELLIA	Insular
30461	99.9	7.6	7.6	FT	Zircon	Cooling 110°C	A	RMS=0.96%	Parrish, R.R.	1983	1131	University of British Columbia; R. Parrish	Coast Plutonic Complex		Plutonic	granite	British Columbia	Bute Inlet	92K	15	16251	50.7882	124.788	373997	5627793	10	50.7883	124.786	374100	5627589	WRANGELLIA	Coast
50364	99.6	8.6	8.6	FT	Zircon	Cooling 200°C	A	RMS=0.99%	Parrish, R.R.	1983	1131	University of British Columbia; R. Parrish	Coast Plutonic Complex		Plutonic	granite	British Columbia	Bute Inlet	92K	10	16261	50.5832	124.963	361061	5605311	10	50.5833	124.961	361161	5605109	WRANGELLIA	Coast
Rd 70-30360	99.5	3.6	3.6	K/Ar	Biotite	Cooling 280°C	A	Age reported as 97.1 Ma; recalibrated herein to IUGS constants (S&J 1977)	Wanless, R.K., Stevens, R.D., Lachance, G.R. and Delabio, R.N.	1978	104	Geological Survey of Canada (Ottawa); Lab ID 76-34	pluton, western Coast Plutonic Complex		Plutonic	Hornblende - biotite quartz diorite	British Columbia	Bute Inlet	92K	6	13563	50.4237	125.061	353594	5587767	10	50.4238	125.06	353693	5587565	WRANGELLIA	Coast
Rd 70-30307	99.4	4.5	4.5	K/Ar	Biotite	Cooling 280°C	A	Age reported as 97 Ma; recalibrated herein to IUGS constants (S&J 1977)	Wanless, R.K., Stevens, R.D., Lachance, G.R. and Delabio, R.N.	1978	104	Geological Survey of Canada (Ottawa); Lab ID 76-36	pluton, western Coast Plutonic Complex		Plutonic	Biotite quartz monzonite	British Columbia	Bute Inlet	92K	10	13562	50.5645	124.752	375934	5602862	10	50.5647	124.75	376034	5602660	WRANGELLIA	Coast
KA 126	99	9.7	9.7	K/Ar	Biotite	Cooling 280°C	B	Age reported as 97 Ma; recalibrated to IUGS decay constants herein. Error is based on an "assumed deviation". No correction for atmospheric argon.	Baadsgaard, H., Folinsbee, R.E. and Lipson, J.I.	1961	1109	University of Alberta; H. Baadsgaard	Coast Plutonic Complex		Plutonic	Granodiorite	British Columbia	Vancouver	92G	6	15311	49.3332	123.268	480529	5464527	10	49.3333	123.267	480625	5464327	WRANGELLIA	Coast
PSM97-001	98.5	2.3	2.3	U/Pb	Zircon	Detrital	B	Spot 43.1, %discordance not reported, no plot, no data for other ages (cannot assess relative concordance). Age is 206Pb/238U age	Mahoney, J.B., Mustard, P.S., Haggart, J.W., Friedman, R.M., Fanning, C.M. and McNicoll, V.J.	1999	1579	Australian National University, Canberra; M. Fanning	Protection Formation, Nanaimo Group		Sedimentary	not reported	British Columbia	Vancouver	92G	4	16983	49.1456	123.787	442634	5443941	10	49.1458	123.785	442731	5443741	WRANGELLIA	Insular
MV88-130	97.2	6.8	6.8	K/Ar	Biotite	Cooling 280°C	A		Friedman, R.M. and Armstrong, R.L.	1995	1505	University of British Columbia; J. Harakal and D. Runkle	Pitt Lake granodiorite, Coast Plutonic Complex		Plutonic	biotite granodiorite	British Columbia	Vancouver	92G	7	16194	49.4732	123.556	459695	5480206	10	49.4733	123.555	459791	5480005	WRANGELLIA	Coast
RD67.40657	96.6	1	1	Ar/Ar	Biotite	Cooling 280°C	A	Plateau age; 96% gas release. Integrated age: 95.2 ±1.1 Ma.	Hunt, P.A. and Roddick, J.C.	1993	35	Geological Survey of Canada (Ottawa); Lab ID 93-13	basic phase of Fish Egg Pluton, Coast Plutonic Complex		Plutonic	coarse-grained tonalite	British Columbia	Rivers Inlet	92M	12	13760	51.709	127.633	594448	5729555	9	51.7083	127.632	594563	5729358	WRANGELLIA	Coast
Rd 70-10234	95.9	4.3	4.3	K/Ar	Biotite	Cooling 280°C	A	Age reported as 93.6 Ma; recalibrated herein to IUGS constants (S&J 1977)	Wanless, R.K., Stevens, R.D., Lachance, G.R. and Delabio, R.N.	1978	104	Geological Survey of Canada (Ottawa); Lab ID 76-37	Quatam Pluton, Coast Plutonic Complex		Plutonic	porphyritic granodiorite, biotite	British Columbia	Bute Inlet	92K	7	13553	50.3468	124.858	367823	5578844	10	50.347	124.856	367922	5578642	WRANGELLIA	Coast
MEKA 74-5	95	4.3	4.3	K/Ar	Whole rock	Igneous cooling age	B	K/Ar whole-rock method unreliable. Age reported as 92.7 Ma; recalibrated herein to IUGS constants (S&J 1977)	Wanless, R.K., Stevens, R.D., Lachance, G.R. and Delabio, R.N.	1978	104	Geological Survey of Canada (Ottawa); Lab ID 76-7	Karmutsen		Volcanic	pillow basalt	British Columbia	Victoria	92B	6	13545	48.4511	123.443	467246	5366540	10	48.4513	123.442	467341	5366341	WRANGELLIA	Insular
PSM97-001	95	2.2	2.2	U/Pb	Zircon	Detrital	B	Spot 8.1, %discordance not reported, no plot, no data for other ages (cannot assess relative concordance). Age is 206Pb/238U age	Mahoney, J.B., Mustard, P.S., Haggart, J.W., Friedman, R.M., Fanning, C.M. and McNicoll, V.J.	1999	1579	Australian National University, Canberra; M. Fanning	Protection Formation, Nanaimo Group		Sedimentary	not reported	British Columbia	Vancouver	92G	4	16946	49.1456	123.787	442634	5443941	10	49.1458	123.785	442731	5443741	WRANGELLIA	Insular
PSM97-004	94.8	2.1	2.1	U/Pb	Zircon	Detrital	B	Spot 7.1, %discordance not reported, no plot, no data for other ages (cannot assess relative concordance). Age is 206Pb/238U age	Mahoney, J.B., Mustard, P.S., Haggart, J.W., Friedman, R.M., Fanning, C.M. and McNicoll, V.J.	1999	1579	Australian National University, Canberra; M. Fanning	DeCourcy Formation, Nanaimo Group		Sedimentary	not reported	British Columbia	Vancouver	92G	4	16896	49.15	123.8	441662	5444439	10	49.1502	123.799	441759	5444239	WRANGELLIA	Insular
RMF89-17	94	1	1	U/Pb	Zircon	Igneous crystallization age	A	3 fractions, concordant and overlapping. Age incorporates Pb/U dates.	Friedman, R.M. and Armstrong, R.L.	1995	1505	University of British Columbia; R. Friedman and R. Armstrong	Big Julie pluton, Coast Plutonic Complex		Plutonic	biotite granodiorite	British Columbia	Bute Inlet	92K	1	16183	50.1465	124.216	413089	5555628	10	50.1467	124.215	413188	5555426	WRANGELLIA	Coast
RL-79-22	93.6	11.6	11.6	K/Ar	Whole Rock	Metamorphic Cooling Age	B	K/Ar whole-rock method unreliable	Sinclair, A.J., Bentzen, A. and McLeod, J.A.	1979	85	University of British Columbia	Nicolai Greenstone		Volcanic	Greenstone strongly altered greenstone; age likely reflects age of metamorphism/alteration	Yukon	Kluane Lake	115G	6	707	61.383	139.335	588941	6806584	7	61.3833	139.333	589051	6806419	WRANGELLIA
SAA-67-436	92.4	4	4	K/Ar	Biotite	Cooling 280°C	A	Age reported as 90 Ma; recalibrated herein to IUGS constants (S&J 1977)	Wanless, R.K., Stevens, R.D., Lachance, G.R. and Delabio, R.N.	1970	100	Geological Survey of Canada (Ottawa); Lab ID 67-28	Map unit F, GSC Map 9-1966, GSC Paper 66-25, Coast Plutonic Cplx		Plutonic	Biotite pyroxene hornblende gabbro	British Columbia	Laredo Sound	103A	1	11585	52.106	128.289	548684	5773064	9	52.1062	128.287	548799	5772868	WRANGELLIA	Coast
Rd 70-30059	91.9	4.2	4.2	K/Ar	Hornblende	Cooling 500°C	A	Age reported as 89.6 Ma; recalibrated herein to IUGS constants (S&J 1977)	Wanless, R.K., Stevens, R.D., Lachance, G.R. and Delabio, R.N.	1978	104	Geological Survey of Canada (Ottawa); Lab ID 76-41	Coast Plutonic Complex		Plutonic	Hornblende - biotite granodiorite, faintly foliated	British Columbia	Bute Inlet	92K	1	13559	50.0962	124.158	417170	5549964	10	50.0963	124.157	417269	5549763	WRANGELLIA	Coast
PSM97-004	90.7	1.4	1.4	U/Pb	Zircon	Detrital	B	Spot 35.1, %discordance not reported, no plot, no data for other ages (cannot assess relative concordance). Age is 206Pb/238U age	Mahoney, J.B., Mustard, P.S., Haggart, J.W., Friedman, R.M., Fanning, C.M. and McNicoll, V.J.	1999	1579	Australian National University, Canberra; M. Fanning	DeCourcy Formation, Nanaimo Group		Sedimentary	not reported	British Columbia	Vancouver	92G	4	16923	49.15	123.8	441662	5444439	10	49.1502	123.799	441759	5444239	WRANGELLIA	Insular
PSM97-004	90.6	4.1	4.1	U/Pb	Zircon	Detrital	B	Spot 38.1, %discordance not reported, no plot, no data for other ages (cannot assess relative concordance). Age is 206Pb/238U age	Mahoney, J.B., Mustard, P.S., Haggart, J.W., Friedman, R.M., Fanning, C.M. and McNicoll, V.J.	1999	1579	Australian National University, Canberra; M. Fanning	DeCourcy Formation, Nanaimo Group		Sedimentary	not reported	British Columbia	Vancouver	92G	4	16926	49.15	123.8	441662	5444439	10	49.1502	123.799	441759	5444239	WRANGELLIA	Insular
20408	90.1	17	17	FT	Apatite	Cooling 110°C	B	RMS=8.4%	Parrish, R.R.	1983	1131	University of British Columbia; R. Parrish	Coast Plutonic Complex		Plutonic	granite	British Columbia	Bute Inlet	92K	6	16246	50.4576	125.271	338809	5591975	10	50.4578	125.269	338908	5591773	WRANGELLIA	Coast
Rd 72-20237	89.5	4.1	4.1	K/Ar	Hornblende	Cooling 500°C	A	Age reported as 87.4 Ma; recalibrated herein to IUGS constants (S&J 1977)	Wanless, R.K., Stevens, R.D., Lachance, G.R. and Delabio, R.N.	1978	104	Geological Survey of Canada (Ottawa); Lab ID 76-24	pluton which cuts Central Gneiss, Coast Plutonic Complex.		Plutonic	granodiorite, hornblende-biotite	British Columbia	Bute Inlet	92K	13	13582	50.7648	125.609	315994	5626919	10	50.765	125.608	316093	5626716	WRANGELLIA	Coast
PSM97-001	88.5	1.7	1.7	U/Pb	Zircon	Detrital	B	Spot 12.1, %discordance not reported, no plot, no data for other ages (cannot assess relative concordance). Age is 206Pb/238U age	Mahoney, J.B., Mustard, P.S., Haggart, J.W., Friedman, R.M., Fanning, C.M. and McNicoll, V.J.	1999	1579	Australian National University, Canberra; M. Fanning	Protection Formation, Nanaimo Group		Sedimentary	not reported	British Columbia	Vancouver	92G	4	16950	49.1456	123.787	442634	5443941	10	49.1458	123.785	442731	5443741	WRANGELLIA	Insular
PSM97-004	88.3	2.5	2.5	U/Pb	Zircon	Detrital	B	Spot 13.1, %discordance not reported, no plot, no data for other ages (cannot assess relative concordance). Age is 206Pb/238U age	Mahoney, J.B., Mustard, P.S., Haggart, J.W., Friedman, R.M., Fanning, C.M. and McNicoll, V.J.	1999	1579	Australian National University, Canberra; M. Fanning	DeCourcy Formation, Nanaimo Group		Sedimentary	not reported	British Columbia	Vancouver	92G	4	16902	49.15	123.8	441662	5444439	10	49.1502	123.799	441759	5444239	WRANGELLIA	Insular
Shell 5	88	0	0	K/Ar	Whole rock	Igneous cooling age	B	K/Ar whole-rock method unreliable	Shell		1485	unknown			Plutonic	Plutonic, 3 different localities;	British Columbia	Nootka Sound	92E	16	15869	49.7498	126.251	697987	5514438	9	49.75	126.25	698099	5514246	WRANGELLIA	Insular
PSM97-004	87.9	1.4	1.4	U/Pb	Zircon	Detrital	B	Spot 17.1, %discordance not reported, no plot, no data for other ages (cannot assess relative concordance). Age is 206Pb/238U age	Mahoney, J.B., Mustard, P.S., Haggart, J.W., Friedman, R.M., Fanning, C.M. and McNicoll, V.J.	1999	1579	Australian National University, Canberra; M. Fanning	DeCourcy Formation, Nanaimo Group		Sedimentary	not reported	British Columbia	Vancouver	92G	4	16906	49.15	123.8	441662	5444439	10	49.1502	123.799	441759	5444239	WRANGELLIA	Insular
PSM97-004	87.8	1.7	1.7	U/Pb	Zircon	Detrital	B	Spot 8.1, %discordance not reported, no plot, no data for other ages (cannot assess relative concordance). Age is 206Pb/238U age	Mahoney, J.B., Mustard, P.S., Haggart, J.W., Friedman, R.M., Fanning, C.M. and McNicoll, V.J.	1999	1579	Australian National University, Canberra; M. Fanning	DeCourcy Formation, Nanaimo Group		Sedimentary	not reported	British Columbia	Vancouver	92G	4	16897	49.15	123.8	441662	5444439	10	49.1502	123.799	441759	5444239	WRANGELLIA	Insular
PSM97-004	87.8	1.8	1.8	U/Pb	Zircon	Detrital	B	Spot 18.1, %discordance not reported, no plot, no data for other ages (cannot assess relative concordance). Age is 206Pb/238U age	Mahoney, J.B., Mustard, P.S., Haggart, J.W., Friedman, R.M., Fanning, C.M. and McNicoll, V.J.	1999	1579	Australian National University, Canberra; M. Fanning	DeCourcy Formation, Nanaimo Group		Sedimentary	not reported	British Columbia	Vancouver	92G	4	16907	49.15	123.8	441662	5444439	10	49.1502	123.799	441759	5444239	WRANGELLIA	Insular
Rd 72-20237	87.7	3.2	3.2	K/Ar	Biotite	Cooling 280°C	A	Age reported as 85.5 Ma; recalibrated herein to IUGS constants (S&J 1977)	Wanless, R.K., Stevens, R.D., Lachance, G.R. and Delabio, R.N.	1978	104	Geological Survey of Canada (Ottawa); Lab ID 76-23	pluton which cuts Central Gneiss, Coast Plutonic Complex.		Plutonic	granodiorite, hornblende-biotite	British Columbia	Bute Inlet	92K	13	13581	50.7648	125.609	315994	5626919	10	50.765	125.608	316093	5626716	WRANGELLIA	Coast
RL-74-75	87.5	7	7	K/Ar	Whole Rock	Metamorphic Cooling Age	B	K/Ar whole-rock method unreliable	Sinclair, A.J., Bentzen, A. and McLeod, J.A.	1979	85	University of British Columbia	Nicolai Greenstone		Volcanic	Greenstone strongly altered greenstone; age likely reflects age of metamorphism/alteration	Yukon	Kluane Lake	115G	6	706	61.383	139.335	588941	6806584	7	61.3833	139.333	589051	6806419	WRANGELLIA
PSM97-001	87.1	1.3	1.3	U/Pb	Zircon	Detrital	B	Spot 2.1, %discordance not reported, no plot, no data for other ages (cannot assess relative concordance). Age is 206Pb/238U age	Mahoney, J.B., Mustard, P.S., Haggart, J.W., Friedman, R.M., Fanning, C.M. and McNicoll, V.J.	1999	1579	Australian National University, Canberra; M. Fanning	Protection Formation, Nanaimo Group		Sedimentary	not reported	British Columbia	Vancouver	92G	4	16940	49.1456	123.787	442634	5443941	10	49.1458	123.785	442731	5443741	WRANGELLIA	Insular
Rd 72-20233	87	3.9	3.9	K/Ar	Hornblende	Cooling 500°C	A	Age reported as 84.9 Ma; recalibrated herein to IUGS constants (S&J 1977)	Wanless, R.K., Stevens, R.D., Lachance, G.R. and Delabio, R.N.	1978	104	Geological Survey of Canada (Ottawa); Lab ID 76-22	pluton cutting Central Gneiss. Coast Plutonic Complex		Plutonic	Biotite granodiorite	British Columbia	Bute Inlet	92K	13	13580	50.8007	125.592	317356	5630860	10	50.8008	125.591	317455	5630657	WRANGELLIA	Coast
MVM-90-61	86.8	0.5	0.5	U/Pb	Zircon	Detrital	A	Fraction E , 0.8% discordant (between U-Pb ages). Age is 206Pb/238U age.	Mustard, P.S., Parrish, R.R. and McNicoll, V.	1995	1519	Geological Survey of Canada (Ottawa); R. Parrish and V. McNicoll	Gabriola Formation, Nanaimo Group		Sedimentary	from base of a massive coarse-grained thick bed of arkosic arenite within a succession of sandstone turbidites and minor mudstone	British Columbia	Vancouver	92G	4	16125	49.1999	123.816	440550	5450000	10	49.2001	123.815	440647	5449800	WRANGELLIA	Insular
PSM97-004	86.7	2.1	2.1	U/Pb	Zircon	Detrital	B	Spot 6.1, %discordance not reported, no plot, no data for other ages (cannot assess relative concordance). Age is 206Pb/238U age	Mahoney, J.B., Mustard, P.S., Haggart, J.W., Friedman, R.M., Fanning, C.M. and McNicoll, V.J.	1999	1579	Australian National University, Canberra; M. Fanning	DeCourcy Formation, Nanaimo Group		Sedimentary	not reported	British Columbia	Vancouver	92G	4	16895	49.15	123.8	441662	5444439	10	49.1502	123.799	441759	5444239	WRANGELLIA	Insular
PSM97-001	86.6	2	2	U/Pb	Zircon	Detrital	B	Spot 30.2, %discordance not reported, no plot, no data for other ages (cannot assess relative concordance). Age is 206Pb/238U age	Mahoney, J.B., Mustard, P.S., Haggart, J.W., Friedman, R.M., Fanning, C.M. and McNicoll, V.J.	1999	1579	Australian National University, Canberra; M. Fanning	Protection Formation, Nanaimo Group		Sedimentary	not reported	British Columbia	Vancouver	92G	4	16969	49.1456	123.787	442634	5443941	10	49.1458	123.785	442731	5443741	WRANGELLIA	Insular
20091	86.5	15.2	15.2	FT	Apatite	Cooling 110°C	B	RMS=7.4%	Parrish, R.R.	1983	1131	University of British Columbia; R. Parrish	Coast Plutonic Complex		Plutonic	granite	British Columbia	Bute Inlet	92K	6	16245	50.297	125.211	342517	5573997	10	50.2972	125.21	342616	5573795	WRANGELLIA	Coast
PSM97-004	86.5	1.2	1.2	U/Pb	Zircon	Detrital	B	Spot 23.1, %discordance not reported, no plot, no data for other ages (cannot assess relative concordance). Age is 206Pb/238U age	Mahoney, J.B., Mustard, P.S., Haggart, J.W., Friedman, R.M., Fanning, C.M. and McNicoll, V.J.	1999	1579	Australian National University, Canberra; M. Fanning	DeCourcy Formation, Nanaimo Group		Sedimentary	not reported	British Columbia	Vancouver	92G	4	16912	49.15	123.8	441662	5444439	10	49.1502	123.799	441759	5444239	WRANGELLIA	Insular
PSM97-004	86.1	2.5	2.5	U/Pb	Zircon	Detrital	B	Spot 46.1, %discordance not reported, no plot, no data for other ages (cannot assess relative concordance). Age is 206Pb/238U age	Mahoney, J.B., Mustard, P.S., Haggart, J.W., Friedman, R.M., Fanning, C.M. and McNicoll, V.J.	1999	1579	Australian National University, Canberra; M. Fanning	DeCourcy Formation, Nanaimo Group		Sedimentary	not reported	British Columbia	Vancouver	92G	4	16934	49.15	123.8	441662	5444439	10	49.1502	123.799	441759	5444239	WRANGELLIA	Insular
4135F	86	20	20	K/Ar	Whole rock	Igneous cooling age	B	K/Ar whole-rock method unreliable. Age reported as 84 Ma; recalibrated herein to IUGS decay constants	Young, I.F.	1981	1145	Shell Development Corporation, Houston, Texas	Top of 99 m section of basalt, sh, ss w. U. Cret. pollen		Volcanic	Altered basalt porphyry and basalt	British Columbia	Moresby Island	103B	14	12137	52.8188	131.014	364283	5854012	9	52.819	131.012	364390	5853816	WRANGELLIA	Insular
Rd 70-30059	85.7	3.1	3.1	K/Ar	Biotite	Cooling 280°C	A	Age reported as 83.6 Ma; recalibrated herein to IUGS constants (S&J 1977)	Wanless, R.K., Stevens, R.D., Lachance, G.R. and Delabio, R.N.	1978	104	Geological Survey of Canada (Ottawa); Lab ID 76-40	Coast Plutonic Complex		Plutonic	Hornblende - biotite granodiorite, faintly foliated	British Columbia	Bute Inlet	92K	1	13558	50.0962	124.158	417170	5549964	10	50.0963	124.157	417269	5549763	WRANGELLIA	Coast
PSM97-004	85.1	2.5	2.5	U/Pb	Zircon	Detrital	B	Spot 5.1, %discordance not reported, no plot, no data for other ages (cannot assess relative concordance). Age is 206Pb/238U age	Mahoney, J.B., Mustard, P.S., Haggart, J.W., Friedman, R.M., Fanning, C.M. and McNicoll, V.J.	1999	1579	Australian National University, Canberra; M. Fanning	DeCourcy Formation, Nanaimo Group		Sedimentary	not reported	British Columbia	Vancouver	92G	4	16894	49.15	123.8	441662	5444439	10	49.1502	123.799	441759	5444239	WRANGELLIA	Insular
PSM97-001	84.9	1.4	1.4	U/Pb	Zircon	Detrital	B	Spot 28.1, %discordance not reported, no plot, no data for other ages (cannot assess relative concordance). Age is 206Pb/238U age	Mahoney, J.B., Mustard, P.S., Haggart, J.W., Friedman, R.M., Fanning, C.M. and McNicoll, V.J.	1999	1579	Australian National University, Canberra; M. Fanning	Protection Formation, Nanaimo Group		Sedimentary	not reported	British Columbia	Vancouver	92G	4	16966	49.1456	123.787	442634	5443941	10	49.1458	123.785	442731	5443741	WRANGELLIA	Insular
Rd 72-20233	84.7	3.1	3.1	K/Ar	Biotite	Cooling 280°C	A	Age reported as 82.6 Ma; recalibrated herein to IUGS constants (S&J 1977)	Wanless, R.K., Stevens, R.D., Lachance, G.R. and Delabio, R.N.	1978	104	Geological Survey of Canada (Ottawa); Lab ID 76-21	pluton cutting Central Gneiss. Coast Plutonic Complex		Plutonic	Biotite granodiorite	British Columbia	Bute Inlet	92K	13	13579	50.8007	125.592	317356	5630860	10	50.8008	125.591	317455	5630657	WRANGELLIA	Coast
Rd 70-10233	84.2	8.7	8.7	K/Ar	Hornblende	Cooling 500°C	A	Age reported as 82.3 Ma; recalibrated herein to IUGS constants (S&J 1977)	Wanless, R.K., Stevens, R.D., Lachance, G.R. and Delabio, R.N.	1978	104	Geological Survey of Canada (Ottawa); Lab ID 76-38	cuts Quatam Pluton		Volcanic	volcanic breccia	British Columbia	Bute Inlet	92K	7	13552	50.3537	124.914	363870	5579704	10	50.3538	124.912	363969	5579502	WRANGELLIA	Coast
Rd 70-10267	84.2	3.1	3.1	K/Ar	Biotite	Cooling 280°C	A	Age reported as 82 Ma; recalibrated herein to IUGS constants (S&J 1977)	Wanless, R.K., Stevens, R.D., Lachance, G.R. and Delabio, R.N.	1978	104	Geological Survey of Canada (Ottawa); Lab ID 76-39	largest discrete pluton in Bute Inlet map-area, Coast Plut Cmplx		Plutonic	granodiorite, unfoliated, fresh, biotite	British Columbia	Bute Inlet	92K	1	13554	50.1673	124.192	414888	5557916	10	50.1675	124.19	414987	5557714	WRANGELLIA	Coast
PSM97-004	84.2	2.4	2.4	U/Pb	Zircon	Detrital	B	Spot 4.1, %discordance not reported, no plot, no data for other ages (cannot assess relative concordance). Age is 206Pb/238U age	Mahoney, J.B., Mustard, P.S., Haggart, J.W., Friedman, R.M., Fanning, C.M. and McNicoll, V.J.	1999	1579	Australian National University, Canberra; M. Fanning	DeCourcy Formation, Nanaimo Group		Sedimentary	not reported	British Columbia	Vancouver	92G	4	16893	49.15	123.8	441662	5444439	10	49.1502	123.799	441759	5444239	WRANGELLIA	Insular
PSM96-029	83.9	0.3	0.3	U/Pb	Zircon	Detrital	B	Fraction E, 14.7% discordant	Mahoney, J.B., Mustard, P.S., Haggart, J.W., Friedman, R.M., Fanning, C.M. and McNicoll, V.J.	1999	1579	University of British Columbia; R. Friedman	Geoffrey Formation, Nanaimo Group		Sedimentary	not reported	British Columbia	Vancouver	92G	4	16824	49.1399	123.792	442220	5443310	10	49.1401	123.791	442317	5443110	WRANGELLIA	Insular
PSM97-001	83.2	1.3	1.3	U/Pb	Zircon	Detrital	B	Spot 20.1, %discordance not reported, no plot, no data for other ages (cannot assess relative concordance). Age is 206Pb/238U age	Mahoney, J.B., Mustard, P.S., Haggart, J.W., Friedman, R.M., Fanning, C.M. and McNicoll, V.J.	1999	1579	Australian National University, Canberra; M. Fanning	Protection Formation, Nanaimo Group		Sedimentary	not reported	British Columbia	Vancouver	92G	4	16958	49.1456	123.787	442634	5443941	10	49.1458	123.785	442731	5443741	WRANGELLIA	Insular
SAA67-491	82.3	5	5	K/Ar	Hornblende	Cooling 500°C	A	Age reported as 80 Ma; recalibrated herein to IUGS constants (S&J 1977)	Wanless, R.K., Stevens, R.D., Lachance, G.R. and Delabio, R.N.	1972	101	Geological Survey of Canada (Ottawa); Lab ID 70-6	Coast Plutonic Complex		Plutonic	diorite, "gneissic" - faintly foliated, bi is chloritized. Bi-Hb	British Columbia	Laredo Sound	103A	1	11582	52.1581	128.259	550714	5778887	9	52.1583	128.257	550829	5778691	WRANGELLIA	Coast
PSM97-004	82.1	1.7	1.7	U/Pb	Zircon	Detrital	B	Spot 9.1, %discordance not reported, no plot, no data for other ages (cannot assess relative concordance). Age is 206Pb/238U age	Mahoney, J.B., Mustard, P.S., Haggart, J.W., Friedman, R.M., Fanning, C.M. and McNicoll, V.J.	1999	1579	Australian National University, Canberra; M. Fanning	DeCourcy Formation, Nanaimo Group		Sedimentary	not reported	British Columbia	Vancouver	92G	4	16898	49.15	123.8	441662	5444439	10	49.1502	123.799	441759	5444239	WRANGELLIA	Insular
Rd 70-30229	81.8	3	3	K/Ar	Biotite	Cooling 280°C	A	Age reported as 79 Ma; recalibrated herein to IUGS constants (S&J 1977)	Wanless, R.K., Stevens, R.D., Lachance, G.R. and Delabio, R.N.	1978	104	Geological Survey of Canada (Ottawa); Lab ID 76-19a	pluton which cuts Central Gneiss Complex of Coast Plutonc Complx		Plutonic	granodiorite, biotite	British Columbia	Bute Inlet	92K	13	13560	50.9398	125.768	305523	5646782	10	50.94	125.767	305623	5646579	WRANGELLIA	Coast
Rd 65-20053	80.7	5	5	K/Ar	Hornblende	Cooling 500°C	A	Age reported as 79 Ma; recalibrated herein to IUGS constants (S&J 1977)	Wanless, R.K., Stevens, R.D., Lachance, G.R. and Delabio, R.N.	1970	100	Geological Survey of Canada (Ottawa); Lab ID 67-33	map unit D, GSC paper 66-25, pluton, Coast Plutonic Complex;		Plutonic	hornblende biotite quartz diorite, moderately foliated;	British Columbia	Bella Coola	93D	4	11548	52.1693	127.993	568847	5780348	9	52.1695	127.992	568962	5780152	WRANGELLIA	Coast
PSM97-001	80.6	2	2	U/Pb	Zircon	Detrital	B	Spot 46.1, %discordance not reported, no plot, no data for other ages (cannot assess relative concordance). Age is 206Pb/238U age	Mahoney, J.B., Mustard, P.S., Haggart, J.W., Friedman, R.M., Fanning, C.M. and McNicoll, V.J.	1999	1579	Australian National University, Canberra; M. Fanning	Protection Formation, Nanaimo Group		Sedimentary	not reported	British Columbia	Vancouver	92G	4	16985	49.1456	123.787	442634	5443941	10	49.1458	123.785	442731	5443741	WRANGELLIA	Insular
Rd 70-30229	80.2	3	3	K/Ar	Biotite	Cooling 280°C	A	Age reported as 79 Ma; recalibrated herein to IUGS constants (S&J 1977)	Wanless, R.K., Stevens, R.D., Lachance, G.R. and Delabio, R.N.	1978	104	Geological Survey of Canada (Ottawa); Lab ID 76-19b	pluton which cuts Central Gneiss Complex of Coast Plutonc Complx		Plutonic	granodiorite, biotite	British Columbia	Bute Inlet	92K	13	13561	50.9398	125.768	305523	5646782	10	50.94	125.767	305623	5646579	WRANGELLIA	Coast
26-2	80	6	6	FT	Zircon	Cooling 200°C	A	15 grains, 1623 tracks counted	Isachsen, C.E.	1987	1441	University of Briitsh Columbia; C. Isachsen	Indian Island intrusion		Plutonic	quartz diorite	British Columbia	Alberni	92F	4	16294	49.112	125.765	298201	5443592	10	49.1122	125.764	298301	5443391	WRANGELLIA	Insular
PSM97-001	79.7	2.9	2.9	U/Pb	Zircon	Detrital	B	Spot 32.1, %discordance not reported, no plot, no data for other ages (cannot assess relative concordance). Age is 206Pb/238U age	Mahoney, J.B., Mustard, P.S., Haggart, J.W., Friedman, R.M., Fanning, C.M. and McNicoll, V.J.	1999	1579	Australian National University, Canberra; M. Fanning	Protection Formation, Nanaimo Group		Sedimentary	not reported	British Columbia	Vancouver	92G	4	16971	49.1456	123.787	442634	5443941	10	49.1458	123.785	442731	5443741	WRANGELLIA	Insular
Shell 4	79	0	0	K/Ar	Whole rock	Igneous cooling age	B	K/Ar whole-rock method unreliable	Shell		1485	unknown			Plutonic	Plutonic, 3 different localities;	British Columbia	Nootka Sound	92E	16	15868	49.7498	126.251	697987	5514438	9	49.75	126.25	698099	5514246	WRANGELLIA	Insular
PSM97-004	78.7	2.7	2.7	U/Pb	Zircon	Detrital	B	Spot 10.1, %discordance not reported, no plot, no data for other ages (cannot assess relative concordance). Age is 206Pb/238U age	Mahoney, J.B., Mustard, P.S., Haggart, J.W., Friedman, R.M., Fanning, C.M. and McNicoll, V.J.	1999	1579	Australian National University, Canberra; M. Fanning	DeCourcy Formation, Nanaimo Group		Sedimentary	not reported	British Columbia	Vancouver	92G	4	16899	49.15	123.8	441662	5444439	10	49.1502	123.799	441759	5444239	WRANGELLIA	Insular
PSM97-001	78.4	1.7	1.7	U/Pb	Zircon	Detrital	B	Spot 24.1, %discordance not reported, no plot, no data for other ages (cannot assess relative concordance). Age is 206Pb/238U age	Mahoney, J.B., Mustard, P.S., Haggart, J.W., Friedman, R.M., Fanning, C.M. and McNicoll, V.J.	1999	1579	Australian National University, Canberra; M. Fanning	Protection Formation, Nanaimo Group		Sedimentary	not reported	British Columbia	Vancouver	92G	4	16962	49.1456	123.787	442634	5443941	10	49.1458	123.785	442731	5443741	WRANGELLIA	Insular
30450	77.7	20	20	FT	Apatite	Cooling 110°C	B	RMS=9.3%	Parrish, R.R.	1983	1131	University of British Columbia; R. Parrish	Coast Plutonic Complex		Plutonic	granite	British Columbia	Bute Inlet	92K	15	16249	50.806	124.84	370327	5629861	10	50.8061	124.839	370429	5629657	WRANGELLIA	Coast
Rd 65-20053	77.3	5	5	K/Ar	Biotite	Cooling 280°C	A	Age reported as 75 Ma; recalibrated herein to IUGS constants (S&J 1977)	Wanless, R.K., Stevens, R.D., Lachance, G.R. and Delabio, R.N.	1970	100	Geological Survey of Canada (Ottawa); Lab ID 67-34	map unit D, GSC paper 66-25, pluton, Coast Plutonic Complex;		Plutonic	hornblende biotite quartz diorite, moderately foliated;	British Columbia	Bella Coola	93D	4	11547	52.1693	127.993	568847	5780348	9	52.1695	127.992	568962	5780152	WRANGELLIA	Coast
PSM97-001	77.2	2	2	U/Pb	Zircon	Detrital	B	Spot 37.1, %discordance not reported, no plot, no data for other ages (cannot assess relative concordance). Age is 206Pb/238U age	Mahoney, J.B., Mustard, P.S., Haggart, J.W., Friedman, R.M., Fanning, C.M. and McNicoll, V.J.	1999	1579	Australian National University, Canberra; M. Fanning	Protection Formation, Nanaimo Group		Sedimentary	not reported	British Columbia	Vancouver	92G	4	16976	49.1456	123.787	442634	5443941	10	49.1458	123.785	442731	5443741	WRANGELLIA	Insular
30461	76.2	12.4	12.4	FT	Apatite	Cooling 200°C	A	RMS=4.5%	Parrish, R.R.	1983	1131	University of British Columbia; R. Parrish	Coast Plutonic Complex		Plutonic	granite	British Columbia	Bute Inlet	92K	15	16250	50.7882	124.788	373997	5627793	10	50.7883	124.786	374100	5627589	WRANGELLIA	Coast
Shell 6	76	0	0	K/Ar	Whole rock	Igneous cooling age	B	K/Ar whole-rock method unreliable	Shell		1485	unknown			Plutonic	Plutonic, 3 different localities;	British Columbia	Nootka Sound	92E	16	15870	49.7498	126.251	697987	5514438	9	49.75	126.25	698099	5514246	WRANGELLIA	Insular
10099	75.2	10.8	10.8	FT	Zircon	Cooling 200°C	A	RMS=0.62%	Parrish, R.R.	1983	1131	University of British Columbia; R. Parrish	Coast Plutonic Complex		Plutonic	granite	British Columbia	Bute Inlet	92K	11	16244	50.6454	125.082	352800	5612459	10	50.6456	125.081	352900	5612257	WRANGELLIA	Coast
Rd 70-40498	75.1	2.7	2.7	K/Ar	Biotite	Cooling 280°C	A	Age reported as 73.2 Ma; recalibrated herein to IUGS constants (S&J 1977)	Wanless, R.K., Stevens, R.D., Lachance, G.R. and Delabio, R.N.	1978	104	Geological Survey of Canada (Ottawa); Lab ID 76-20	pluton in Coast Plutonic Complex		Plutonic	Biotite quartz diorite	British Columbia	Bute Inlet	92K	14	13572	50.9343	125.389	332139	5645239	10	50.9345	125.388	332239	5645037	WRANGELLIA	Coast
PSM97-004	74.1	1	1	U/Pb	Zircon	Detrital	B	Spot 40.1, %discordance not reported, no plot, no data for other ages (cannot assess relative concordance). Age is 206Pb/238U age	Mahoney, J.B., Mustard, P.S., Haggart, J.W., Friedman, R.M., Fanning, C.M. and McNicoll, V.J.	1999	1579	Australian National University, Canberra; M. Fanning	DeCourcy Formation, Nanaimo Group		Sedimentary	not reported	British Columbia	Vancouver	92G	4	16928	49.15	123.8	441662	5444439	10	49.1502	123.799	441759	5444239	WRANGELLIA	Insular
4135H	74	12	12	K/Ar	Whole rock	Igneous cooling age	B	K/Ar whole-rock method unreliable. Age reported as 72 Ma; recalibrated herein to IUGS decay constants	Young, I.F.	1981	1145	Shell Development Corporation, Houston, Texas	Top of 99 m section of basalt, sh, ss w. U. Cret. pollen		Volcanic	Altered basalt porphyry and basalt	British Columbia	Moresby Island	103B	14	12138	52.8188	131.014	364283	5854012	9	52.819	131.012	364390	5853816	WRANGELLIA	Insular
MVM-90-61	73.6	0.9	0.9	U/Pb	Zircon	Detrital	A	Fraction I , 0.94% discordant (between U-Pb ages). Age is 206Pb/238U age.	Mustard, P.S., Parrish, R.R. and McNicoll, V.	1995	1519	Geological Survey of Canada (Ottawa); R. Parrish and V. McNicoll	Gabriola Formation, Nanaimo Group		Sedimentary	from base of a massive coarse-grained thick bed of arkosic arenite within a succession of sandstone turbidites and minor mudstone	British Columbia	Vancouver	92G	4	16129	49.1999	123.816	440550	5450000	10	49.2001	123.815	440647	5449800	WRANGELLIA	Insular
30325	73.4	9.8	9.8	FT	Zircon	Cooling 200°C	A	RMS=0.92%	Parrish, R.R.	1983	1131	University of British Columbia; R. Parrish	Coast Plutonic Complex		Plutonic	granite	British Columbia	Bute Inlet	92K	15	16248	50.8148	124.885	367221	5630928	10	50.815	124.883	367323	5630724	WRANGELLIA	Coast
BBC 24	73	50	50	Rb/Sr	WR-mineral	Igneous crystallization age	C	3 pt regression, MSWD=0.6, init. 87/86Sr=0.7044. Mineral separates: light & heavy feldspar fractions. From UBC lab data sheets; no isochron plot nor discussion of the analysis/interpretation. Large relative error. Rb/Sr affected by alteration in feldspar	Parrish, R.R. and Armstrong, R.L.	0	1208	University of British Columbia; R. Armstrong and R. Parrish	Coast Plutonic Complex		Plutonic	quartz diorite	British Columbia	Bella Coola	93D	4	12472	52.1748	127.978	569887	5780974	9	52.175	127.976	570002	5780778	WRANGELLIA	Coast
MVM-90-61	72.7	0.5	0.5	U/Pb	Zircon	Detrital	A	Fraction G , 0.14% discordant (between U-Pb ages). Age is 206Pb/238U age.	Mustard, P.S., Parrish, R.R. and McNicoll, V.	1995	1519	Geological Survey of Canada (Ottawa); R. Parrish and V. McNicoll	Gabriola Formation, Nanaimo Group		Sedimentary	from base of a massive coarse-grained thick bed of arkosic arenite within a succession of sandstone turbidites and minor mudstone	British Columbia	Vancouver	92G	4	16127	49.1999	123.816	440550	5450000	10	49.2001	123.815	440647	5449800	WRANGELLIA	Insular
MVM-90-61	72.6	0.3	0.3	U/Pb	Zircon	Detrital	A	Fraction C , -2.69% discordant (between U-Pb ages). Age is 206Pb/238U age.	Mustard, P.S., Parrish, R.R. and McNicoll, V.	1995	1519	Geological Survey of Canada (Ottawa); R. Parrish and V. McNicoll	Gabriola Formation, Nanaimo Group		Sedimentary	from base of a massive coarse-grained thick bed of arkosic arenite within a succession of sandstone turbidites and minor mudstone	British Columbia	Vancouver	92G	4	16123	49.1999	123.816	440550	5450000	10	49.2001	123.815	440647	5449800	WRANGELLIA	Insular
MVM-90-61	72.5	1	1	U/Pb	Zircon	Detrital	B	Fraction h , -7.25% discordant (between U-Pb ages). Age is 206Pb/238U age.	Mustard, P.S., Parrish, R.R. and McNicoll, V.	1995	1519	Geological Survey of Canada (Ottawa); R. Parrish and V. McNicoll	Gabriola Formation, Nanaimo Group		Sedimentary	from base of a massive coarse-grained thick bed of arkosic arenite within a succession of sandstone turbidites and minor mudstone	British Columbia	Vancouver	92G	4	16128	49.1999	123.816	440550	5450000	10	49.2001	123.815	440647	5449800	WRANGELLIA	Insular
MVM-90-61	72.5	1.5	1.5	U/Pb	Zircon	Detrital	A	Fraction K , 0.82% discordant (between U-Pb ages). Age is 206Pb/238U age.	Mustard, P.S., Parrish, R.R. and McNicoll, V.	1995	1519	Geological Survey of Canada (Ottawa); R. Parrish and V. McNicoll	Gabriola Formation, Nanaimo Group		Sedimentary	from base of a massive coarse-grained thick bed of arkosic arenite within a succession of sandstone turbidites and minor mudstone	British Columbia	Vancouver	92G	4	16131	49.1999	123.816	440550	5450000	10	49.2001	123.815	440647	5449800	WRANGELLIA	Insular
4718A2	72.5	1.2	1.2	Ar/Ar	Plag	Cooling 250°C	A	5 steps 67.6% 39Ar release MSWD=1.3, n=5	Greene, A.R., Scoates, J.S., Weis, D, Israel, S., Nixon, G.T., Katvala, E.C.	2008	2000	University of British Columbia; T. Ullrich	Karmutsen Formation	Vancouver Island	Volcanic	pillow basalt	British Columbia							384260	5455150	10
MVM-90-61	72.3	0.7	0.7	U/Pb	Zircon	Detrital	B	Fraction M , -9.05% discordant (between U-Pb ages). Age is 206Pb/238U age.	Mustard, P.S., Parrish, R.R. and McNicoll, V.	1995	1519	Geological Survey of Canada (Ottawa); R. Parrish and V. McNicoll	Gabriola Formation, Nanaimo Group		Sedimentary	from base of a massive coarse-grained thick bed of arkosic arenite within a succession of sandstone turbidites and minor mudstone	British Columbia	Vancouver	92G	4	16133	49.1999	123.816	440550	5450000	10	49.2001	123.815	440647	5449800	WRANGELLIA	Insular
MEKA 72-3	70.6	4	4	K/Ar	Hornblende	Cooling 500°C	A	Age reported as 68.7 Ma; recalibrated herein to IUGS constants (S&J 1977)	Wanless, R.K., Stevens, R.D., Lachance, G.R. and Delabio, R.N.	1974	103	Geological Survey of Canada (Ottawa); Lab ID 73-8b	map unit 21, Alberni map area, GSC paper 68-50;		Plutonic	granodiorite, fine grained, inequigranular, hornblende, biotite	British Columbia	Alberni	92F	4	13533	49.0136	125.569	312126	5432153	10	49.0138	125.568	312225	5431952	WRANGELLIA	Insular
10099	66.7	14	14	FT	Apatite	Cooling 110°C	B	RMS=7.9%	Parrish, R.R.	1983	1131	University of British Columbia; R. Parrish	Coast Plutonic Complex		Plutonic	granite	British Columbia	Bute Inlet	92K	11	16243	50.6454	125.082	352800	5612459	10	50.6456	125.081	352900	5612257	WRANGELLIA	Coast
AK 378	64	6	6	K/Ar	Biotite	Cooling 280°C	B	Age reported as 62 Ma; recalibrated herein to IUGS decay constants . K2O>5%; biotite likely altered.	Mathews, W.H.	1964	1133	University of Alberta; H. Baadsgaard	Sill(?) in Masset Formation, lower part		Volcanic	Porphyry with biotite and feldspar	British Columbia	Graham Island	103F	8	12038	53.4031	132.387	673721	5920291	8	53.4033	132.385	673842	5920108	WRANGELLIA	Insular
MEKA 72-3	63.8	4	4	K/Ar	Hornblende	Cooling 500°C	A	Age reported as 62.7 Ma; recalibrated herein to IUGS constants (S&J 1977)	Wanless, R.K., Stevens, R.D., Lachance, G.R. and Delabio, R.N.	1974	103	Geological Survey of Canada (Ottawa); Lab ID 73-8a	map unit 21, Alberni map area, GSC paper 68-50;		Plutonic	granodiorite, fine grained, inequigranular, hornblende, biotite	British Columbia	Alberni	92F	4	13532	49.0136	125.569	312126	5432153	10	49.0138	125.568	312225	5431952	WRANGELLIA	Insular
10088	63.3	23.4	23.4	FT	Apatite	Cooling 110°C	B	RMS=14.3%	Parrish, R.R.	1983	1131	University of British Columbia; R. Parrish	Coast Plutonic Complex		Plutonic	granite	British Columbia	Bute Inlet	92K	6	16242	50.4448	125.171	345865	5590342	10	50.445	125.169	345964	5590140	WRANGELLIA	Coast
WC-94-2	63	21	21	FT	Apatite	Cooling 110°C	A		Currie, L.D. and Grist, A.M.	1996	1514	Rensselaer Polytechnic Institute; A. Grist	not reported			not reported	British Columbia	Cape Flattery	92C	15	16085	48.9602	124.984	354777	5424925	10	48.9604	124.983	354875	5424725	WRANGELLIA	Insular
MEKA 65-2	60.4	3	3	K/Ar	Biotite	Cooling 280°C	A	Age reported as 59 Ma; recalibrated herein to IUGS constants (S&J 1977)	Wanless, R.K., Stevens, R.D., Lachance, G.R. and Edmonds, C.M.	1968	99	Geological Survey of Canada (Ottawa); Lab ID 66-32	same as associated with Brynnor Mines; Paradise Creek Stock;		Plutonic	qz monzonite, porphyritic, biotite	British Columbia	Alberni	92F	3	13479	49.0235	125.488	318145	5433047	10	49.0237	125.486	318244	5432846	WRANGELLIA	Insular
4135I	59	14	14	K/Ar	Whole rock	Igneous cooling age	B	Age reported as 57 Ma; recalibrated herein to IUGS decay constants herein. K/Ar whole-rock method unreliable	Young, I.F.	1981	1145	Shell Development Corporation, Houston, Texas	base of section of basalt and sediments;		Volcanic	basalt porphyry	British Columbia	Queens Sound	102P	11	15345	51.6015	129.348	475886	5716772	9	51.6017	129.346	476001	5716574	WRANGELLIA	Insular
36011	56.7	6.6	6.6	FT	Apatite	Cooling 110°C	A	RMS=0.74%	Parrish, R.R.	1983	1131	University of British Columbia; R. Parrish	Coast Plutonic Complex		Plutonic	granite	British Columbia	Bute Inlet	92K	15	16255	50.9226	124.708	379922	5642610	10	50.9228	124.707	380025	5642406	WRANGELLIA	Coast
WC-94-3	56	28	28	FT	Apatite	Cooling 110°C	A		Currie, L.D. and Grist, A.M.	1996	1514	Rensselaer Polytechnic Institute; A. Grist	not reported			not reported	British Columbia	Cape Flattery	92C	16	16087	48.8394	125.136	343302	5411800	10	48.8396	125.134	343400	5411600	WRANGELLIA	Insular
36011	55.7	7.4	7.4	FT	Zircon	Cooling 200°C	A	RMS=4.7%	Parrish, R.R.	1983	1131	University of British Columbia; R. Parrish	Coast Plutonic Complex		Plutonic	granite	British Columbia	Bute Inlet	92K	15	16254	50.9226	124.708	379922	5642610	10	50.9228	124.707	380025	5642406	WRANGELLIA	Coast
CHEMAP3	55	14	14	FT	Apatite	Cooling 110°C	A	14 grains, 53 tracks	England, T.D.J., Currie, L.D., Massey, N.W.D., Roden-Tice, M.K. and Miller, D.S.	1997	1500		Island Plutonic Suite		Plutonic	granodiorite	British Columbia	Cape Flattery	92C	16	16090	48.9298	124.177	413763	5420320	10	48.93	124.176	413860	5420120	WRANGELLIA	Insular
SE-0413-87	54.5	3.2	3.2	K/Ar	Hornblende	Cooling 500°C	A		Hunt, P.A. and Roddick, J.C.	1991	32	Geological Survey of Canada (Ottawa); Lab ID 90-16, K-Ar# 4064	cuts Kunga Formation		Volcanic	andesite porphyry dyke	British Columbia	Moresby Island	103B	3	11776	52.2215	131.053	359743	5787658	9	52.2217	131.052	359851	5787459	WRANGELLIA	Insular
PC-2	54	12	12	FT	Apatite	Cooling 110°C	C	Inconsistent with K-Ar ages; FT are much older	Christopher, P.A.	1973	7	University of British Columbia; P. Christopher			Plutonic	Quartz Latite Porphyry intrusive plug	Yukon	Kluane Lake	115G	6	1534	61.3711	139.305	590608	6805296	7	61.3714	139.303	590718	6805131	WRANGELLIA
BBC 24	54	8.8	8.8	FT	Zircon	Cooling 200°C	A	RMS=0.78%	Parrish, R.R.	1983	1131	University of British Columbia; R. Parrish	Coast Plutonic Complex		Plutonic	quartz diorite	British Columbia	Bella Coola	93D	4	12961	52.1748	127.978	569887	5780974	9	52.175	127.976	570002	5780778	WRANGELLIA	Coast
WC-94-2d	53	6	6	FT	Apatite	Cooling 110°C	A		Currie, L.D. and Grist, A.M.	1996	1514	A. Grist	not reported			not reported	British Columbia	Cape Flattery	92C	16	16086	48.7906	125.215	337302	5406550	10	48.7908	125.214	337400	5406350	WRANGELLIA	Insular
PN-70-124A	51.5	3.4	3.4	K/Ar	Biotite	Cooling 280°C	B	Age reported as 50.6 Ma; recalibrated to IUGS decay constants herein. K2O<5%; biotite likely altered.	Muller, J.E., Northcote, K.E. and Carlisle, D.	1974	1462	University of British Columbia, J. Harakal and W. White	dyke		Plutonic	quartz feldspar biotite porphyry	British Columbia	Ashcroft	92I	16	15793	50.8215	128.202	556235	5630276	9	50.8217	128.2	556352	5630080	WRANGELLIA	Insular
Cow Bay	51.2	0.4	0.4	U/Pb	Zircon	Igneous crystallization age	A	2 concordant fractions, overlapping within error. Age is mean of both fractions.	Irving, E. and Brandon, M.T.	1990	1494	Geological Survey of Canada (Ottawa); D. Parkinson and R. Parrish	Flores volcanics		Volcanic	tuff	British Columbia	Nootka Sound	92E	8	15988	49.2645	126.178	705267	5460686	9	49.2647	126.177	705379	5460494	WRANGELLIA	Insular
CT-J-4-6-64	50.2	12	12	K/Ar	Biotite	Cooling 280°C	B	Age reported as 48 Ma; recalibrated herein to IUGS constants (S&J 1977). No correction for atmospheric argon.	Wanless, R.K., Stevens, R.D., Lachance, G.R. and Edmonds, C.M.	1967	98	Geological Survey of Canada (Ottawa); Lab ID 65-11	Quartz Diorite of Hecate Bay = Catface Pluton;		Plutonic	qz diorite - fine grained, hornblende - biotite	British Columbia	Alberni	92F	4	13457	49.2428	125.951	285189	5458640	10	49.243	125.95	285288	5458439	WRANGELLIA	Insular
Mt Ozzard	50	0.5	0.5	U/Pb	Zircon	Igneous crystallization age	A	2 near-concordant to slightly discordant fractions; age is lower intercept. Ideally want 3rd fraction to confirm discordia, but in this case one fraction touches concordia. Poorly constrained upper intercept (inheritance) at 1734 ±790 Ma.	Irving, E. and Brandon, M.T.	1990	1494	Geological Survey of Canada (Ottawa); D. Parkinson and R. Parrish	Flores volcanics		Volcanic	tuff	British Columbia	Cape Flattery	92C	14	15989	48.9535	125.486	318013	5425262	10	48.9537	125.484	318111	5425061	WRANGELLIA	Insular
10086	49.3	20	20	FT	Apatite	Cooling 110°C	C	RMS=15.3%	Parrish, R.R.	1983	1131	University of British Columbia; R. Parrish	Coast Plutonic Complex		Plutonic	granite	British Columbia	Bute Inlet	92K	6	16241	50.4593	125.188	344729	5591982	10	50.4594	125.186	344828	5591780	WRANGELLIA	Coast
NOREX-1	48.5	3	3	K/Ar	Biotite	Cooling 280°C	A	Age reported as 47 Ma; recalibrated herein to IUGS constants (S&J 1977)	Wanless, R.K., Stevens, R.D., Lachance, G.R. and Delabio, R.N.	1973	102	Geological Survey of Canada (Ottawa); Lab ID 72-19	cuts mineralization, Brynnor Iron Mine, dyke;		Volcanic	feldspar porphyry, andesine porphyroblasts	British Columbia	Alberni	92F	3	13508	49.0498	125.435	322101	5435848	10	49.05	125.433	322200	5435647	WRANGELLIA	Insular
RBP	48.4	14	14	Rb/Sr	WR-mineral	Igneous cooling age	B	WR + 3 min separates (plag, hbl and biot). Isochron visually tight; MSWD not reported (errorchron?)	Isachsen, C.E.	1987	1441	University of British Columbia; C. Isachsen	Catface Intrusion		Plutonic	quartz diorite	British Columbia	Alberni	92F	4	16298	49.2248	125.925	287052	5456564	10	49.225	125.923	287151	5456363	WRANGELLIA	Insular
SDU88-15-11	47	12	12	FT	Apatite	Cooling 110°C	A	13 grains, 105 tracks	England, T.D.J., Currie, L.D., Massey, N.W.D., Roden-Tice, M.K. and Miller, D.S.	1997	1500		Island Plutonic Suite		Plutonic	diorite	British Columbia	Alberni	92F	1	16088	49.0964	124.416	396633	5439136	10	49.0966	124.415	396730	5438936	WRANGELLIA	Insular
JRI88-16-4-1	46.8	3.6	3.6	K/Ar	Whole rock	Igneous cooling age	B	K/Ar whole-rock method unreliable	Massey, N.W.D.	1992	1524	University of British Columbia; J. Harakal	Mount Washington Intrusive suite		Plutonic	feldspar-hornblende porphyry	British Columbia	Alberni	92F	2	16315	49.0851	124.718	374568	5438339	10	49.0853	124.716	374666	5438139	WRANGELLIA	Insular
AT-87-27-3	46.2	0.2	0.2	U/Pb	Zircon	Igneous crystallization age	A	3 concordant overlapping fractions; age is average U-Pb age.	Anderson, R.G. and Reichenbach, I.	1991	1246	Geological Survey of Canada, Ottawa	Carpenter Bay pluton, Kano plutonic suite		Plutonic	biotite-hornblende quartz monzodiorite	British Columbia	Moresby Island	103B	3	12893	52.1635	131.048	359892	5781199	9	52.1636	131.047	360000	5781000	WRANGELLIA	Insular
GS-49-66	45.8	6	6	K/Ar	Whole rock	Igneous cooling age	B	K/Ar whole-rock method unreliable. Age reported as 44.6 Ma; recalibrated herein to IUGS standards using table in Dalrymple (1979)	Young, I.F.	1981	1145	Kreuger Enterprises Ltd., Cambridge, Mass., for Pan-american Petroleum Corporation	Masset, hypabyssal equivalent		Volcanic	Rhyolite ash flow tuff	British Columbia	Dixon Entrance	103K	2	12146	54.1692	132.968	632627	6004252	8	54.1695	132.967	632738	6004074	WRANGELLIA	Insular
MEKA 72-3	45.1	2.3	2.3	K/Ar	Biotite	Cooling 280°C	A	Age reported as 44.5 Ma; recalibrated herein to IUGS constants (S&J 1977)	Wanless, R.K., Stevens, R.D., Lachance, G.R. and Delabio, R.N.	1974	103	Geological Survey of Canada (Ottawa); Lab ID 73-9	map unit 21, Alberni map area, GSC paper 68-50;		Plutonic	granodiorite, fine grained, inequigranular, hornblende, biotite	British Columbia	Alberni	92F	4	13534	49.0136	125.569	312126	5432153	10	49.0138	125.568	312225	5431952	WRANGELLIA	Insular
TE88-640	45	6	6	FT	Apatite	Cooling 110°C	A	20 grains, 56 tracks	England, T.D.J., Currie, L.D., Massey, N.W.D., Roden-Tice, M.K. and Miller, D.S.	1997	1500		Extension Formation, Nanaimo Group		Sedimentary	sandstone	British Columbia	Victoria	92B	12	16094	48.7265	123.686	449526	5397278	10	48.7267	123.685	449622	5397079	WRANGELLIA	Insular
50364	44.3	7	7	FT	Apatite	Cooling 110°C	B	RMS=5.5%	Parrish, R.R.	1983	1131	University of British Columbia; R. Parrish	Coast Plutonic Complex		Plutonic	granite	British Columbia	Bute Inlet	92K	10	16260	50.5832	124.963	361061	5605311	10	50.5833	124.961	361161	5605109	WRANGELLIA	Coast
AT-87-7-3	43.7	1.1	1.1	K/Ar	Hornblende	Cooling 500°C	A		Hunt, P.A. and Roddick, J.C.	1990	31	Geological Survey of Canada (Ottawa); Lab ID 89-20, K-Ar# 3980	Rose Harbor dyke swarm, intrudes Sandilands Formation, Kunga Group		Volcanic	plagioclase-hornblende-biotite porphyry dyke	British Columbia	Moresby Island	103B	3	11746	52.2141	131.005	362992	5786749	9	52.2142	131.004	363100	5786550	WRANGELLIA	Insular
MEKA 71-5	43.2	7	7	K/Ar	Hornblende	Cooling 500°C	A	Age reported as 42.1 Ma; recalibrated herein to IUGS constants (S&J 1977)	Wanless, R.K., Stevens, R.D., Lachance, G.R. and Delabio, R.N.	1974	103	Geological Survey of Canada (Ottawa); Lab ID 73-4	Mount Washington Plutonic Suite		Plutonic	medium-grained light-coloured hornblende plagioclase porphyry dyke	British Columbia	Whitesail Lake	93E	8	11656	49.447	126.31	694895	5480622	9	49.4472	126.31	695001	5480434	WRANGELLIA	Insular
4143	43	4	4	K/Ar	Whole rock	Igneous cooling age	B	Age reported as 42 Ma; recalibrated herein to IUGS decay constants herein. K/Ar whole-rock method unreliable	Young, I.F.	1981	1145	Shell Development Corporation, Houston, Texas	near base of 95 + m section of flow and pyroclastic;		Volcanic	basalt porphyry	British Columbia	Queens Sound	102P	13	15348	51.9175	129.972	433167	5752303	9	51.9177	129.97	433274	5752107	WRANGELLIA	Insular
SFR88-18-6-2	42.7	3	3	K/Ar	Whole rock	Igneous cooling age	B	K/Ar whole-rock method unreliable	Massey, N.W.D.	1992	1524	University of British Columbia; J. Harakal	Mount Washington Intrusive suite		Plutonic	dacite dyke	British Columbia	Alberni	92F	2	16312	49.0906	124.725	374051	5438963	10	49.0908	124.724	374149	5438763	WRANGELLIA	Insular
PC-1	42	14	14	FT	Apatite	Cooling 110°C	B	Much older than K-Ar age, but consistent within error.	Christopher, P.A.	1973	7	University of British Columbia; P. Christopher			Plutonic	Quartz Latite Porphyry intrusive plug	Yukon	Kluane Lake	115G	6	1533	61.3713	139.308	590459	6805323	7	61.3717	139.306	590569	6805158	WRANGELLIA
CHEMAP2	42	8	8	FT	Apatite	Cooling 110°C	A	22 grains, 47 tracks	England, T.D.J., Currie, L.D., Massey, N.W.D., Roden-Tice, M.K. and Miller, D.S.	1997	1500		Island Plutonic Suite		Plutonic	granodiorite	British Columbia	Cape Flattery	92C	16	16089	48.9291	124.091	420103	5420150	10	48.9293	124.089	420200	5419950	WRANGELLIA	Insular
30325	41.9	7.4	7.4	FT	Apatite	Cooling 110°C	B	RMS=6.0%	Parrish, R.R.	1983	1131	University of British Columbia; R. Parrish	Coast Plutonic Complex		Plutonic	granite	British Columbia	Bute Inlet	92K	15	16247	50.8148	124.885	367221	5630928	10	50.815	124.883	367323	5630724	WRANGELLIA	Coast
SE-0423-87	41.1	4.6	4.6	K/Ar	Hornblende	Cooling 500°C	A		Hunt, P.A. and Roddick, J.C.	1991	32	Geological Survey of Canada (Ottawa); Lab ID 90-15, K-Ar# 4065	cuts Kunga Formation		Volcanic	andesite porphyry dyke	British Columbia	Moresby Island	103B	6	11775	52.3165	131.145	353794	5798403	9	52.3167	131.143	353903	5798205	WRANGELLIA	Insular
TMV-10	41.1	2.8	2.8	K/Ar	Whole rock	Igneous cooling age	B	K/Ar Whole rock method unreliable	Hyndman, R.D. and Hamilton, T.S.	1991	1049	University of British Columbia; J. Harakal and K. Scott	Masset, base of paleomag section		Volcanic	basalt, dark grey, with chlorite clots	British Columbia	Moresby Island	103B	11	11840	52.5498	131.358	340103	5824803	9	52.55	131.357	340210	5824605	WRANGELLIA	Insular
RBP	41	1	1	U/Pb	Zircon	Igneous crystallization age	A	2 fractions, concordant but not overlapping. Age is range of U-Pb ages covered by both fractions.	Isachsen, C.E.	1984	1336	University of British Columbia; C. Isachsen	Catface Intrusion		Plutonic	quartz diorite	British Columbia	Alberni	92F	4	15955	49.2248	125.925	287052	5456564	10	49.225	125.923	287151	5456363	WRANGELLIA	Insular
CHEMAP1	41	12	12	FT	Apatite	Cooling 110°C	A	19 grains, 60 tracks	England, T.D.J., Currie, L.D., Massey, N.W.D., Roden-Tice, M.K. and Miller, D.S.	1997	1500		Island Plutonic Suite		Plutonic	granodiorite	British Columbia	Cape Flattery	92C	16	16091	48.9062	124.057	422533	5417570	10	48.9064	124.056	422630	5417370	WRANGELLIA	Insular
NMA88-13-2	40.6	2.8	2.8	K/Ar	Whole rock	Igneous cooling age	B	K/Ar whole-rock method unreliable	Massey, N.W.D.	1992	1524	University of British Columbia; J. Harakal	Mount Washington Intrusive suite		Plutonic	hornblende-feldspar porphyry	British Columbia	Alberni	92F	1	16310	49.0903	124.46	393411	5438520	10	49.0905	124.459	393508	5438320	WRANGELLIA	Insular
SFR88-25-3-2	40.3	2.8	2.8	K/Ar	Whole rock	Igneous cooling age	B	K/Ar whole-rock method unreliable	Massey, N.W.D.	1992	1524	University of British Columbia; J. Harakal	Mount Washington Intrusive suite		Plutonic	feldspar-hornblende porphyry	British Columbia	Alberni	92F	2	16313	49.0919	124.624	381454	5438937	10	49.092	124.622	381552	5438737	WRANGELLIA	Insular
5003A	40	0	38	K/Ar	Whole rock	Maximum age	B	K/Ar whole-rock method unreliable. Age reported as 39 Ma; recalibrated herein to IUGS decay constants	Young, I.F.	1981	1145	Shell Development Corporation, Houston, Texas	Near middle of 65 + m section of basalt and shale interbeds		Volcanic	Basalt	British Columbia	Moresby Island	103B	7	12140	52.4113	130.795	377879	5808302	9	52.4115	130.794	377986	5808104	WRANGELLIA	Insular
TE88-405	40	8	8	FT	Apatite	Cooling 110°C	A	15 grains, 76 tracks	England, T.D.J., Currie, L.D., Massey, N.W.D., Roden-Tice, M.K. and Miller, D.S.	1997	1500		Extension Formation, Nanaimo Group		Sedimentary	sandstone	British Columbia	Victoria	92B	11	16095	48.7145	123.483	464451	5395836	10	48.7147	123.482	464547	5395637	WRANGELLIA	Insular
CT-K-17_9_65	39.9	7	7	K/Ar	Biotite	Cooling 280°C	B	K2O<5%; biotite was likely altered. Age reported as 39 Ma; recalibrated herein to IUGS constants (S&J 1977)	Wanless, R.K., Stevens, R.D., Lachance, G.R. and Edmonds, C.M.	1968	99	Geological Survey of Canada (Ottawa); Lab ID 66-29	small plug;		Plutonic	qz diorite, fine to medium grained, biotite - hornblende	British Columbia	Alberni	92F	11	13481	49.6532	125.413	325851	5502863	10	49.6533	125.411	325950	5502661	WRANGELLIA	Insular
65-AB-10	39.9	2	2	K/Ar	Biotite	Cooling 280°C	A	Age reported as 39 Ma; recalibrated herein to IUGS constants (S&J 1977)	Wanless, R.K., Stevens, R.D., Lachance, G.R. and Delabio, R.N.	1970	100	Geological Survey of Canada (Ottawa); Lab ID 67-19	Pocket Inlet Pluton. Pocket Batholith, core.		Plutonic	granite, porphyritic, coarse; Hornblende- biotite.	British Columbia	Moresby Island	103B	12	11574	52.5731	131.802	310150	5828470	9	52.5733	131.8	310257	5828274	WRANGELLIA	Insular
CT-X-4	39.9	2	2	K/Ar	Biotite	Cooling 280°C	A	Age reported as 38 Ma; recalibrated herein to IUGS constants (S&J 1977)	Wanless, R.K., Stevens, R.D., Lachance, G.R. and Delabio, R.N.	1973	102	Geological Survey of Canada (Ottawa); Lab ID 72-21	Corrigan Creek porphyry Cu;		Plutonic	qz diorite, medium grained, mineralized	British Columbia	Alberni	92F	2	13507	49.0143	124.65	379349	5430358	10	49.0145	124.649	379446	5430158	WRANGELLIA	Insular
NMA88-7-8-1	39.3	2.8	2.8	K/Ar	Whole rock	Igneous cooling age	B	K/Ar whole-rock method unreliable	Massey, N.W.D.	1992	1524	University of British Columbia; J. Harakal	Mount Washington Intrusive suite		Plutonic	hornblende-feldspar porphyry	British Columbia	Alberni	92F	2	16309	49.1801	124.592	383957	5448694	10	49.1803	124.591	384055	5448494	WRANGELLIA	Insular
MEKA 74-11	39.1	2.8	2.8	K/Ar	Hornblende	Cooling 500°C	A	Age reported as 38 Ma; recalibrated herein to IUGS constants (S&J 1977)	Wanless, R.K., Stevens, R.D., Lachance, G.R. and Delabio, R.N.	1978	104	Geological Survey of Canada (Ottawa); Lab ID 76-16	2 km diameter pluton;		Plutonic	qz diorite, hornblende, biotite	British Columbia	Nootka Sound	92E	15	13543	49.8623	126.575	674269	5526140	9	49.8625	126.574	674381	5525947	WRANGELLIA	Insular
WC-94-1	39	8	8	FT	Apatite	Cooling 110°C	A		Currie, L.D. and Grist, A.M.	1996	1514	Rensselaer Polytechnic Institute; A. Grist	not reported			not reported	British Columbia	Alberni	92F	2	16081	49.082	124.842	365502	5438200	10	49.0821	124.841	365600	5438000	WRANGELLIA	Insular
SFR88-18-2-2	39	3	3	K/Ar	Whole rock	Igneous cooling age	B	K/Ar whole-rock method unreliable	Massey, N.W.D.	1992	1524	University of British Columbia; J. Harakal	Mount Washington Intrusive suite		Plutonic	feldspar-hornblende porphyry	British Columbia	Alberni	92F	2	16311	49.0758	124.713	374878	5437293	10	49.076	124.712	374976	5437093	WRANGELLIA	Insular
ATG-88-415-2	38.9	0.1	0.1	U/Pb	Zircon	Igneous crystallization age	A	2 fractions, overlap each other and concordia. Age is average U-Pb age.	Anderson, R.G. and Reichenbach, I.	1991	1246	Geological Survey of Canada, Ottawa	Pocket Inlet pluton, Kano plutonic suite		Plutonic	equigranular biotite granite	British Columbia	Moresby Island	103B	12	12892	52.6246	131.838	307893	5834296	9	52.6247	131.837	308000	5834100	WRANGELLIA	Insular
CT-B-21-6-64	38.2	14	14	K/Ar	Biotite	Cooling 280°C	B	Age reported as 38 Ma; recalibrated herein to IUGS constants (S&J 1977). No correction for atmospheric argon.	Wanless, R.K., Stevens, R.D., Lachance, G.R. and Edmonds, C.M.	1967	98	Geological Survey of Canada (Ottawa); Lab ID 65-12	map unit 6, BCDOM Bull. 27, Fig 2; Zeballos Batholith;		Plutonic	qz diorite - fine to medium grained, hornblende - biotite	British Columbia	Alert Bay	92L	2	13456	50.0351	126.786	658547	5544885	9	50.0353	126.784	658660	5544692	WRANGELLIA	Insular
65-AB-10	38.2	2	2	K/Ar	Hornblende	Cooling 500°C	A	Age reported as 38 Ma; recalibrated herein to IUGS constants (S&J 1977)	Wanless, R.K., Stevens, R.D., Lachance, G.R. and Delabio, R.N.	1970	100	Geological Survey of Canada (Ottawa); Lab ID 67-18	Pocket Inlet Pluton. Pocket Batholith, core.		Plutonic	granite, porphyritic, coarse; Hornblende- biotite.	British Columbia	Moresby Island	103B	12	11575	52.5731	131.802	310150	5828470	9	52.5733	131.8	310257	5828274	WRANGELLIA	Insular
MEKA T1-1	38.2	2.1	2.1	K/Ar	Biotite	Cooling 280°C	A	Age reported as 36.6 Ma; recalibrated herein to IUGS constants (S&J 1977)	Wanless, R.K., Stevens, R.D., Lachance, G.R. and Delabio, R.N.	1974	103	Geological Survey of Canada (Ottawa); Lab ID 73-6	map unit Tg, Nootka Sound map area;		Plutonic	granodiorite, biotite	British Columbia	Nootka Sound	92E	8	13522	49.4068	126.267	698270	5476270	9	49.407	126.265	698381	5476079	WRANGELLIA	Insular
TE88-538	38	6	6	FT	Apatite	Cooling 110°C	A	20 grains, 71 tracks	England, T.D.J., Currie, L.D., Massey, N.W.D., Roden-Tice, M.K. and Miller, D.S.	1997	1500		Benson Formation, Nanaimo Group		Sedimentary	sandstone	British Columbia	Victoria	92B	13	16092	48.794	123.639	453042	5404751	10	48.7942	123.638	453138	5404552	WRANGELLIA	Insular
NMA88-3-2-1	38	2.8	2.8	K/Ar	Whole rock	Igneous cooling age	B	K/Ar whole-rock method unreliable	Massey, N.W.D.	1992	1524	University of British Columbia; J. Harakal	Mount Washington Intrusive suite		Plutonic	feldspar-hornblende porphyry	British Columbia	Alberni	92F	1	16308	49.1252	124.466	393067	5442408	10	49.1254	124.464	393164	5442208	WRANGELLIA	Insular
HFB-89-165	37.5	2.3	2.3	K/Ar	Whole rock	Igneous cooling age	B	K/Ar whole rock method unreliable.	Hunt, P.A. and Roddick, J.C.	1994	151	Geological Survey of Canada (Ottawa); Lab ID 94-40, K-Ar# 4446	Masset volcanics		Volcanic	plagioclase-phyric basalt flow	British Columbia	Graham Island	103F	8	11824	53.2953	132.367	675454	5908359	8	53.3094	132.366	675575	5908175	WRANGELLIA	Insular
RBP	37.1	2.6	2.6	K/Ar	Hornblende	Cooling 500°C	A		Isachsen, C.E.	1987	1441	University of British Columbia; J. Harakal and K. Scott	Catface Intrusion		Plutonic	quartz diorite	British Columbia	Alberni	92F	4	16289	49.2248	125.925	287052	5456564	10	49.225	125.923	287151	5456363	WRANGELLIA	Insular
4135J	37	8	8	K/Ar	Whole rock	Igneous cooling age	B	K/Ar whole-rock method unreliable. Age reported as 36 Ma; recalibrated herein to IUGS decay constants	Young, I.F.	1981	1145	Shell Development Corporation, Houston, Texas	Base of 26 + m section of flow and pyroclastic		Volcanic	Basalt porphyry	British Columbia	Moresby Island	103B	7	12139	52.3376	130.611	390256	5799813	9	52.3378	130.609	390363	5799615	WRANGELLIA	Insular
Shell 3	37	0	0	K/Ar	Whole rock	Igneous cooling age	B	K/Ar whole-rock method unreliable	Shell		1485	unknown			Plutonic	Pluton	British Columbia	Nootka Sound	92E	9	15867	49.4998	126.168	705036	5486871	9	49.5	126.167	705148	5486680	WRANGELLIA	Insular
SD-278-N63	36.9	6	6	K/Ar	Whole rock	Igneous cooling age	B	K/Ar whole-rock method unreliable. Age reported as 36 Ma; recalibrated herein to IUGS standards using table in Dalrymple (1979)	Young, I.F.	1981	1145	Shell Development Corporation, Houston, Texas	Masset Tartu Facies; Basalt member		Volcanic	Olivine basalt porphyry	British Columbia	Hecate Strait	103G	5	12162	53.4176	131.915	306307	5922684	9	53.4178	131.913	306417	5922489	WRANGELLIA	Insular
CT-A-6_9_65	36.5	6	6	K/Ar	Biotite	Cooling 280°C	A	Age reported as 35 Ma; recalibrated herein to IUGS constants (S&J 1977)	Wanless, R.K., Stevens, R.D., Lachance, G.R. and Edmonds, C.M.	1968	99	Geological Survey of Canada (Ottawa); Lab ID 66-30	Mt. Washington Stock		Plutonic	qz diorite, fresh, biotite - hornblende	British Columbia	Alberni	92F	14	13480	49.7676	125.291	334996	5515317	10	49.7678	125.29	335095	5515115	WRANGELLIA	Insular
MEKA 71-3	36.5	2.1	2.1	K/Ar	Biotite	Cooling 280°C	B	K2O<5%; biotite was likely altered. Age reported as 35.1 Ma; recalibrated herein to IUGS constants (S&J 1977)	Wanless, R.K., Stevens, R.D., Lachance, G.R. and Delabio, R.N.	1974	103	Geological Survey of Canada (Ottawa); Lab ID 73-7	Clayoquot Plutonic Suite		Plutonic	biotite quartz monzonite	British Columbia	Nootka Sound	92E	8	13515	49.3734	126.232	700933	5472648	9	49.3736	126.231	701039	5472460	WRANGELLIA	Insular
88PL-L1a	36.2	2.8	2.8	K/Ar	Whole rock	Igneous cooling age	B	K/Ar feldspar method unreliable. No notation on data sheet indicating who collected the sample	Harakal, J.E. and Runkle, D.	0	1201	University of British Columba; J. Harakal and D. Runkle	Massett Formation		Volcanic	andesite flow, moderately altered;	British Columbia	Graham Island	103F	1	12328	53.1956	132.258	683139	5897536	8	53.1958	132.257	683259	5897352	WRANGELLIA	Insular
GS-29-66	36.1	4	4	K/Ar	Whole rock	Igneous cooling age	B	K/Ar whole-rock method unreliable. Age reported as 35.2 Ma; recalibrated herein to IUGS standards using table in Dalrymple (1979)	Young, I.F.	1981	1145	Kreuger Enterprises Ltd., Cambridge, Mass., for Pan-american Petroleum Corporation	Tow Hill Sills		Volcanic	Olivine basalt	British Columbia	Prince Rupert	103J	4	12141	54.073	131.797	317024	5995266	9	54.0733	131.795	317127	5995077	WRANGELLIA	Insular
WC-94-5	36	7	7	FT	Apatite	Cooling 110°C	A		Currie, L.D. and Grist, A.M.	1996	1514	Rensselaer Polytechnic Institute; A. Grist	not reported			not reported	British Columbia	Alberni	92F	2	16084	49.0398	124.803	368252	5433450	10	49.04	124.801	368350	5433250	WRANGELLIA	Insular
WC-94-4b	36	10	10	FT	Apatite	Cooling 110°C	A		Currie, L.D. and Grist, A.M.	1996	1514	Rensselaer Polytechnic Institute; A. Grist	not reported			not reported	British Columbia	Alberni	92F	2	16083	49.1371	124.796	369027	5444250	10	49.1373	124.794	369125	5444050	WRANGELLIA	Insular
TMV-50	35.9	2.8	2.8	K/Ar	Whole rock	Igneous cooling age	B	K/Ar Whole rock method unreliable	Hyndman, R.D. and Hamilton, T.S.	1991	1049	University of British Columbia; J. Harakal and K. Scott	Masset, near top of paleomag section		Volcanic	basalt, light grey	British Columbia	Moresby Island	103B	11	11843	52.5531	131.352	340567	5825159	9	52.5533	131.35	340674	5824961	WRANGELLIA	Insular
AT-88-288-1	35.7	0.3	0.3	U/Pb	Zircon	Igneous crystallization age	A	2 overlapping concordant fractions; age is average U-Pb age.	Anderson, R.G. and Reichenbach, I.	1991	1246	Geological Survey of Canada, Ottawa	Sedgwick Bay pluton, Kano plutonic suite		Plutonic	biotite monzogranite	British Columbia	Moresby Island	103B	12	12891	52.6168	131.521	329368	5832622	9	52.6169	131.519	329475	5832425	WRANGELLIA	Insular
PC-2	35	10	10	FT	Apatite	Cooling 110°C	C	Inconsistent with K-Ar ages; FT are much older	Christopher, P.A.	1973	7	University of British Columbia; P. Christopher			Plutonic	Quartz Latite Porphyry intrusive plug	Yukon	Kluane Lake	115G	6	1535	61.3711	139.305	590608	6805296	7	61.3714	139.303	590718	6805131	WRANGELLIA
MEKA 74-11	34.6	2.1	2.1	K/Ar	Biotite	Cooling 280°C	A	Age reported as 33.8 Ma; recalibrated herein to IUGS constants (S&J 1977)	Wanless, R.K., Stevens, R.D., Lachance, G.R. and Delabio, R.N.	1978	104	Geological Survey of Canada (Ottawa); Lab ID 76-15	2 km diameter pluton;		Plutonic	qz diorite, hornblende, biotite	British Columbia	Nootka Sound	92E	15	13542	49.8623	126.575	674269	5526140	9	49.8625	126.574	674381	5525947	WRANGELLIA	Insular
HFB92SEKN	34.5	1.2	1.2	K/Ar	Whole rock	Igneous cooling age	B	K/Ar whole rock method unreliable.	Hunt, P.A. and Roddick, J.C.	1994	151	Geological Survey of Canada (Ottawa); Lab ID 94-38, K-Ar# 4447	Masset volcanics		Volcanic	fine-grained sphyric rhyolite dome	British Columbia	Moresby Island	103C	16	11822	52.8959	132.197	688563	5864366	8	52.8967	132.195	688682	5864181	WRANGELLIA	Insular
88PL-L2b	34.4	2.6	2.6	K/Ar	Whole rock	Igneous cooling age	B	K/Ar feldspar method unreliable. No notation on data sheet indicating who collected the sample	Harakal, J.E. and Runkle, D.	0	1201	University of British Columba; J. Harakal and D. Runkle	Massett Formation		Volcanic	andesite flow, moderately altered	British Columbia	Graham Island	103F	1	12329	53.1872	132.238	684510	5896661	8	53.1875	132.237	684630	5896477	WRANGELLIA	Insular
ATG-88-333-1	34.3	0.6	0.6	U/Pb	Zircon	Igneous crystallization age	A	3 fractions, two slightly-reverse discordant and overlapping. Age is average U-Pb age for best two fractions.	Anderson, R.G. and Reichenbach, I.	1991	1246	Geological Survey of Canada, Ottawa	Northwest Louise Island pluton, Kano plutonic suite		Plutonic	biotite quartz monzodiorite	British Columbia	Moresby Island	103B	13	12888	52.9848	131.922	303842	5874570	9	52.985	131.92	303950	5874375	WRANGELLIA	Insular
RBP	34.1	2.6	2.6	K/Ar	Biotite	Cooling 280°C	B	K2O<5%; biotite likely altered.	Isachsen, C.E.	1987	1441	University of British Columbia; J. Harakal and K. Scott	Catface Intrusion		Plutonic	quartz diorite	British Columbia	Alberni	92F	4	16290	49.2248	125.925	287052	5456564	10	49.225	125.923	287151	5456363	WRANGELLIA	Insular
ATG-88-260-1	33.8	0.6	0.6	U/Pb	Zircon	Igneous crystallization age	A	3 concordant fractions, two overlapping. Age is average U-Pb age for best two fractions.	Anderson, R.G. and Reichenbach, I.	1991	1246	Geological Survey of Canada, Ottawa	Southern Louise Island pluton, Kano plutonic suite		Plutonic	younger, biotite-quartz monzonite phase	British Columbia	Moresby Island	103B	13	12889	52.8823	131.769	313694	5862771	9	52.8825	131.767	313800	5862575	WRANGELLIA	Insular
ATG-88-263-1	33.8	0.4	0.4	U/Pb	Zircon	Igneous crystallization age	A	3 overlapping concordant to slightly-discordant fractions; age is average U-Pb age of best two fractions.	Anderson, R.G. and Reichenbach, I.	1991	1246	Geological Survey of Canada, Ottawa	Southern Louise Island pluton, Kano plutonic suite		Plutonic	older, hornblende monzodiorite phase	British Columbia	Moresby Island	103B	13	12890	52.876	131.721	316919	5861947	9	52.8764	131.719	317025	5861750	WRANGELLIA	Insular
46094	33.6	6.6	6.6	FT	Apatite	Cooling 110°C	B	RMS=7.1%	Parrish, R.R.	1983	1131	University of British Columbia; R. Parrish	Coast Plutonic Complex		Plutonic	granite	British Columbia	Bute Inlet	92K	15	16257	50.9026	124.746	377233	5640448	10	50.9028	124.744	377337	5640244	WRANGELLIA	Coast
GS-31-66	33.6	4.8	4.8	K/Ar	Whole rock	Igneous cooling age	B	K/Ar whole-rock method unreliable. Age reported as 32.7 Ma; recalibrated herein to IUGS decay constants	Young, I.F.	1981	1145	Kreuger Enterprises Ltd., Cambridge, Mass., for Pan-american Petroleum Corporation	Syntectonic part of Kano Batholith west		Plutonic	Biotite quartz diorite	British Columbia	Graham Island	103F	2	12142	53.2476	132.618	658901	5902457	8	53.2478	132.617	659022	5902274	WRANGELLIA	Insular
MEKA T1-1	33	3.9	3.9	K/Ar	Hornblende	Cooling 500°C	A	Age reported as 32.5 Ma; recalibrated herein to IUGS constants (S&J 1977)	Wanless, R.K., Stevens, R.D., Lachance, G.R. and Delabio, R.N.	1974	103	Geological Survey of Canada (Ottawa); Lab ID 73-5	map unit Tg, Nootka Sound map area;		Plutonic	granodiorite, biotite	British Columbia	Nootka Sound	92E	8	13521	49.4068	126.267	698270	5476270	9	49.407	126.265	698381	5476079	WRANGELLIA	Insular
SD-261-63	33	4	4	K/Ar	Biotite	Cooling 280°C	B	K2O <5%; biotite was likely altered. Age reported as 32 Ma; recalibrated herein to IUGS decay constants	Young, I.F.	1981	1145	Shell Development Corporation, Houston, Texas	Syntectonic pluton		Plutonic	Biotite quartz diorite	British Columbia	Moresby Island	103B	12	12158	52.6753	131.997	297411	5840362	9	52.6755	131.995	297518	5840166	WRANGELLIA	Insular
WC-94-1c	33	11	11	FT	Apatite	Cooling 110°C	A		Currie, L.D. and Grist, A.M.	1996	1514	Rensselaer Polytechnic Institute; A. Grist	not reported			not reported	British Columbia	Cape Flattery	92C	15	16082	48.9855	124.911	360202	5427600	10	48.9857	124.909	360300	5427400	WRANGELLIA	Insular
KN68-158	32.8	3.2	3.2	K/Ar	Whole rock	Igneous cooling age	B	Age reported as 32.3 Ma; recalibrated to IUGS decay constants herein. K/Ar whole-rock method unreliable	Muller, J.E., Northcote, K.E. and Carlisle, D.	1974	1462	University of British Columbia, J. Harakal and W. White	dyke		Volcanic	basalt;	British Columbia	Alert Bay	92L	12	15794	50.5985	127.675	593755	5606012	9	50.5987	127.674	593870	5605817	WRANGELLIA	Insular
AT-87-80-1	32.2	0.3	0.3	U/Pb	Zircon	Igneous crystallization age	A	2 overlapping concordant fractions, age is average U-Pb age	Anderson, R.G. and Reichenbach, I.	1991	1246	Geological Survey of Canada, Ottawa	Kano Inlet pluton, Kano plutonic suite		Plutonic	hornblende (clinopyroxene)-biotite quartz monzodiorite	British Columbia	Graham Island	103F	1	12887	53.2139	132.478	668430	5899033	8	53.2142	132.475	668550	5898850	WRANGELLIA	Insular
65-AB-19	31.3	3	3	K/Ar	Biotite	Cooling 280°C	A	Age reported as 30 Ma; recalibrated herein to IUGS constants (S&J 1977)	Wanless, R.K., Stevens, R.D., Lachance, G.R. and Delabio, R.N.	1972	101	Geological Survey of Canada (Ottawa); Lab ID 70-2	Kano batholith, central part		Plutonic	granodiorite; Biotite-hornblende-augite	British Columbia	Graham Island	103F	1	11632	53.2164	132.485	667918	5899295	8	53.2167	132.483	668038	5899112	WRANGELLIA	Insular
SD-263-63	31	4	4	K/Ar	Whole rock	Igneous cooling age	B	K/Ar whole-rock method unreliable. Age reported as 30 Ma; recalibrated herein to IUGS decay constants	Young, I.F.	1981	1145	Shell Development Corporation, Houston, Texas	Post tectonic Pocket Batholith, core		Plutonic	Biotite granodiorite	British Columbia	Moresby Island	103B	12	12160	52.6149	131.87	305728	5833303	9	52.6152	131.868	305835	5833107	WRANGELLIA	Insular
26-2	31	38	38	FT	Apatite	Cooling 110°C	C	Error exceeds age - meaningless	Isachsen, C.E.	1987	1441	University of Briitsh Columbia; C. Isachsen	Indian Island intrusion		Plutonic	quartz diorite	British Columbia	Alberni	92F	4	16295	49.112	125.765	298201	5443592	10	49.1122	125.764	298301	5443391	WRANGELLIA	Insular
TE88-541	31	6	6	FT	Apatite	Cooling 110°C	A	20 grains, 63 tracks	England, T.D.J., Currie, L.D., Massey, N.W.D., Roden-Tice, M.K. and Miller, D.S.	1997	1500		Benson Formation, Nanaimo Group		Sedimentary	sandstone	British Columbia	Victoria	92B	13	16093	48.7951	123.605	455593	5404854	10	48.7953	123.603	455689	5404655	WRANGELLIA	Insular
HFB92SEMR1	30.6	2.1	2.1	K/Ar	Whole rock	Igneous cooling age	B	K/Ar whole-rock method unreliable.	Hunt, P.A. and Roddick, J.C.	1994	151	Geological Survey of Canada (Ottawa); Lab ID 94-37	Masset volcanics		Volcanic	spherulitic rhyolite	British Columbia	Moresby Island	103C	16	12879	52.8214	132.207	688213	5856061	8	52.8356	132.205	688332	5855876	WRANGELLIA	Insular
4136D	30	8	8	K/Ar	Whole rock	Igneous cooling age	B	Age reported as 29 Ma; recalibrated herein to IUGS decay constants herein. K/Ar whole-rock method unreliable	Young, I.F.	1981	1145	Shell Development Corporation, Houston, Texas	basalt flows and pyroclastics		Volcanic	basalt porphyry	British Columbia	Queens Sound	102P	11	15346	51.6015	129.348	475886	5716772	9	51.6017	129.346	476001	5716574	WRANGELLIA	Insular
5729A1	29.7	1.1	1.1	Ar/Ar	Hbl	Cooling 500°C	A	5 steps 82.8% 39Ar release MSWD=1.9, n=5 ; U-Pb zircon age 31.2 ±0.2 Ma	Greene, A.R., Scoates, J.S., Weis, D, Israel, S., Nixon, G.T., Katvala, E.C.	2008	2000	University of British Columbia; T. Ullrich	Nikolai Formation	Alaska Range	Volcanic	hornblende andesite porphyry	Alaska							544615	6998163	6
65-AB-21	29.6	2	2	K/Ar	Biotite	Cooling 280°C	A	Age reported as 29 Ma; recalibrated herein to IUGS constants (S&J 1977)	Wanless, R.K., Stevens, R.D., Lachance, G.R. and Delabio, R.N.	1970	100	Geological Survey of Canada (Ottawa); Lab ID 67-17	Kano Complex. E phase		Plutonic	granodiorite, fresh. Biotite - hornblende	British Columbia	Graham Island	103F	8	11630	53.2897	132.435	670962	5907570	8	53.29	132.433	671083	5907387	WRANGELLIA	Insular
SE360288	29.5	3.7	3.7	K/Ar	Hornblende	Cooling 500°C	A		Hunt, P.A. and Roddick, J.C.	1992	34	Geological Survey of Canada (Ottawa); Lab ID 92-15, K-Ar# 4343	Lyell Island igneous complex		Volcanic	hornblende-feldspar phyric andesite dyke	British Columbia	Moresby Island	103B	11	11814	52.6998	131.427	336033	5841638	9	52.7	131.425	336139	5841440	WRANGELLIA	Insular
GS-54-66	29.5	4	4	K/Ar	Whole rock	Igneous cooling age	B	K/Ar whole-rock method unreliable. Age reported as 28.7 Ma; recalibrated herein to IUGS standards using table in Dalrymple (1979)	Young, I.F.	1981	1145	Kreuger Enterprises Ltd., Cambridge, Mass., for Pan-american Petroleum Corporation	Masset, Tartu Facies, Basalt Member		Volcanic	Basalt	British Columbia	Dixon Entrance	103K	1	12149	54.0692	132.239	680650	5994746	8	54.0695	132.238	680763	5994567	WRANGELLIA	Insular
TMV-21	28.9	2.2	2.2	K/Ar	Whole rock	Igneous cooling age	B	K/Ar Whole rock method unreliable	Hyndman, R.D. and Hamilton, T.S.	1991	1049	University of British Columbia; J. Harakal and K. Scott	Masset, base of paleomag section;		Volcanic	basalt, grey	British Columbia	Moresby Island	103C	16	11841	52.8047	132.163	691205	5854322	8	52.805	132.162	691324	5854137	WRANGELLIA	Insular
SD-253-N63	28	2	2	K/Ar	Whole rock	Igneous cooling age	B	K/Ar whole-rock method unreliable. Age reported as 27 Ma; recalibrated herein to IUGS decay constants	Young, I.F.	1981	1145	Shell Development Corporation, Houston, Texas	Masset, Dana Facies		Volcanic	Basalt porphyry	British Columbia	Moresby Island	103B	11	12155	52.6731	131.414	336778	5838644	9	52.6733	131.412	336884	5838446	WRANGELLIA	Insular
HFB92SERT	27.9	0.8	0.8	K/Ar	Whole rock	Igneous cooling age	B	K/Ar whole rock method unreliable.	Hunt, P.A. and Roddick, J.C.	1994	151	Geological Survey of Canada (Ottawa); Lab ID 94-39, K-Ar# 4448	Masset volcanics		Volcanic	quartz-porphyry (rhyolite) dike	British Columbia	Moresby Island	103B	13	11823	52.7942	131.88	305826	5853267	9	52.795	131.88	305933	5853071	WRANGELLIA	Insular
CH-87-56-10	27.9	0.4	0.4	U/Pb	Zircon	Igneous crystallization age	A	2 overlapping concordant to near-concordant fractions, age is average U-Pb age	Anderson, R.G. and Reichenbach, I.	1991	1246	Geological Survey of Canada, Ottawa	Pivot Mountain pluton, Kano plutonic suite		Plutonic	clinopyroxene-orthopyroxene diorite	British Columbia	Dixon Entrance	103K	3	12885	54.0154	133.005	630746	5987081	8	54.0158	133.003	630860	5986900	WRANGELLIA	Insular
PC-2	27.1	2.4	2.4	K/Ar	Biotite	Cooling 280°C	A	Age first reported as 26.7 Ma; recalibrated herein to IUGS decay constants	Christopher, P.A., White, W.H. and Harakal, J.E.	1972	8	University of British Columbia			Plutonic	Quartz Latite Porphyry intrusive plug	Yukon	Kluane Lake	115G	6	97	61.3711	139.305	590608	6805296	7	61.3714	139.303	590718	6805131	WRANGELLIA
CH-87-30-09	27	0.3	0.3	U/Pb	Zircon	Igneous crystallization age	A	2 overlapping concordant fractions, age is average U-Pb age	Anderson, R.G. and Reichenbach, I.	1991	1246	Geological Survey of Canada, Ottawa	Sheila Lake pluton, Kano plutonic suite		Plutonic	clinopyroxene-orthopyroxene diorite	British Columbia	Graham Island	103F	8	12886	53.4928	132.476	667429	5930056	8	53.4931	132.474	667550	5929875	WRANGELLIA	Insular
CH-87-56-6	26.8	0.4	0.4	U/Pb	Zircon	Igneous crystallization age	A	2 near-concordant fractions, age is average U-Pb age	Anderson, R.G. and Reichenbach, I.	1991	1246	Geological Survey of Canada, Ottawa	Langara Island pluton, Kano plutonic suite		Plutonic	biotite-hornblende quartz monzodiorite	British Columbia	Dixon Entrance	103K	6	12884	54.2575	133.048	627141	6013930	8	54.2578	133.047	627250	6013750	WRANGELLIA	Insular
PC-1	26.5	2	2	K/Ar	Biotite	Cooling 280°C	A	Age first reported as 26.0 Ma; recalibrated herein to IUGS decay constants	Christopher, P.A., White, W.H. and Harakal, J.E.	1972	8	University of British Columbia			Plutonic	Quartz Latite Porphyry intrusive plug	Yukon	Kluane Lake	115G	6	93	61.3713	139.308	590459	6805323	7	61.3717	139.306	590569	6805158	WRANGELLIA
PC-4	26.5	2	2	K/Ar	Biotite	Cooling 280°C	A	Age first reported as 26.0 Ma; recalibrated herein to IUGS decay constants	Christopher, P.A., White, W.H. and Harakal, J.E.	1972	8	University of British Columbia			Plutonic	Quartz Latite Porphyry intrusive plug	Yukon	Kluane Lake	115G	6	107	61.3747	139.438	583503	6805521	7	61.375	139.436	583613	6805356	WRANGELLIA
161-790	26.4	1.8	1.8	K/Ar	Whole rock	Igneous cooling age	B	K/Ar Whole rock method unreliable	Hyndman, R.D. and Hamilton, T.S.	1991	1049	University of British Columbia; J. Harakal and K. Scott	Masset		Volcanic	basalt	British Columbia	Graham Island	103F	10	11830	53.638	132.688	652822	5945735	8	53.6383	132.687	652942	5945554	WRANGELLIA	Insular
65-AB-21	26.1	6	6	K/Ar	Hornblende	Cooling 500°C	A	Age reported as 26 Ma; recalibrated herein to IUGS constants (S&J 1977)	Wanless, R.K., Stevens, R.D., Lachance, G.R. and Delabio, R.N.	1970	100	Geological Survey of Canada (Ottawa); Lab ID 67-16	Kano Complex. E phase		Plutonic	granodiorite, fresh. Biotite - hornblende	British Columbia	Graham Island	103F	8	11631	53.2897	132.435	670962	5907570	8	53.29	132.433	671083	5907387	WRANGELLIA	Insular
SD-262-63	26	4	4	K/Ar	K-Feldspar	Cooling 200°C	B	K/Ar feldspar method unreliable. Age reported as 25 Ma; recalibrated herein to IUGS decay constants	Young, I.F.	1981	1145	Shell Development Corporation, Houston, Texas	Post tectonic Pocket Batholith margin		Plutonic	Granite	British Columbia	Moresby Island	103B	12	12159	52.6056	131.909	303035	5832372	9	52.6058	131.907	303142	5832176	WRANGELLIA	Insular
SD-265-63	25	4	4	K/Ar	Whole rock	Igneous cooling age	B	K/Ar whole-rock method unreliable. Age reported as 24 Ma; recalibrated herein to IUGS decay constants	Young, I.F.	1981	1145	Shell Development Corporation, Houston, Texas	Post tectonic Atli Inlet Pluton		Plutonic	Quartz Monzonite	British Columbia	Moresby Island	103B	12	12161	52.7276	131.601	324377	5845143	9	52.7278	131.599	324484	5844946	WRANGELLIA	Insular
MR 9	24.5	1.6	1.6	K/Ar	Whole rock	Igneous cooling age	B	K/Ar whole-rock method unreliable. Age reported as 23.9 Ma; recalibrated herein to IUGS decay constants	Young, I.F.	1981	1145	University of British Columba	Masset Formation, Tartu Facies, Rhyolite Member.		Volcanic	Rhyolite ash flow tuff	British Columbia	Graham Island	103F	9	12152	53.5097	132.335	676712	5932281	8	53.51	132.333	676833	5932099	WRANGELLIA	Insular
137-410	24.4	1.6	1.6	K/Ar	Whole rock	Igneous cooling age	B	K/Ar Whole rock method unreliable	Hyndman, R.D. and Hamilton, T.S.	1991	1049	University of British Columbia; J. Harakal and K. Scott	Masset		Volcanic	basalt	British Columbia	Graham Island	103F	9	11829	53.7097	132.497	665211	5954135	8	53.71	132.495	665331	5953954	WRANGELLIA	Insular
GS-51-66	24.4	2.6	2.6	K/Ar	Whole rock	Igneous cooling age	B	K/Ar whole-rock method unreliable. Age reported as 23.8 Ma; recalibrated herein to IUGS standards using table in Dalrymple (1979)	Young, I.F.	1981	1145	Kreuger Enterprises Ltd., Cambridge, Mass., for Pan-american Petroleum Corporation	Masset Tartu Facies Basalt Member		Volcanic	Basalt	British Columbia	Dixon Entrance	103K	2	12148	54.1552	132.652	653346	6003336	8	54.1555	132.65	653459	6003158	WRANGELLIA	Insular
MR 2	24.3	1.6	1.6	K/Ar	Whole rock	Igneous cooling age	B	K/Ar whole-rock method unreliable. Age reported as 23.7 Ma; recalibrated herein to IUGS decay constants	Young, I.F.	1981	1145	University of British Columba	Masset Formation, Tartu Facies, Rhyolite Member.		Volcanic	Rhyolite ash flow tuff	British Columbia	Graham Island	103F	9	12150	53.5097	132.335	676712	5932281	8	53.51	132.333	676833	5932099	WRANGELLIA	Insular
342-1020	23.9	1.6	1.6	K/Ar	Whole rock	Igneous cooling age	B	K/Ar Whole rock method unreliable	Hyndman, R.D. and Hamilton, T.S.	1991	1049	University of British Columbia; J. Harakal and K. Scott	Masset		Volcanic	dacite porphyry, black and white;	British Columbia	Graham Island	103F	9	11835	53.5464	132.295	679208	5936458	8	53.5467	132.293	679329	5936277	WRANGELLIA	Insular
GS-50-66	23.7	2.8	2.8	K/Ar	Hornblende	Cooling 500°C	A	Age reported as 23.1 Ma; recalibrated herein to IUGS standards using table in Dalrymple (1979)	Young, I.F.	1981	1145	Kreuger Enterprises Ltd., Cambridge, Mass., for Pan-american Petroleum Corporation	Post tectonic pluton - Langara Pluton		Plutonic	Diorite	British Columbia	Dixon Entrance	103K	7	12147	54.25	132.982	631469	6013219	8	54.2503	132.981	631578	6013040	WRANGELLIA	Insular
BVI-3684	23.6	1.6	1.6	K/Ar	Whole rock	Igneous cooling age	B	K/Ar Whole rock method unreliable	Hyndman, R.D. and Hamilton, T.S.	1991	1049	University of British Columbia; J. Harakal and K. Scott	Masset		Volcanic	basalt, grey green, chlorite veins;	British Columbia	Graham Island	103F	15	11839	53.9347	132.703	650767	5978699	8	53.935	132.702	650882	5978520	WRANGELLIA	Insular
38-2310	23.2	1.6	1.6	K/Ar	Feldspar	Cooling 200°C	B	K/Ar K-feldspar method unreliable	Hyndman, R.D. and Hamilton, T.S.	1991	1049	University of British Columbia; J. Harakal and K. Scott	Masset, near top of paleomag section;		Volcanic	rhyolite, white, silicified	British Columbia	Moresby Island	103C	16	11836	52.8264	132.203	688416	5856626	8	52.8267	132.202	688535	5856441	WRANGELLIA	Insular
BVI-203	23	1.6	1.6	K/Ar	Whole rock	Igneous cooling age	B	K/Ar Whole rock method unreliable	Hyndman, R.D. and Hamilton, T.S.	1991	1049	University of British Columbia; J. Harakal and K. Scott	Masset		Volcanic	basalt, black, subophitic	British Columbia	Graham Island	103F	15	11838	53.9347	132.703	650767	5978699	8	53.935	132.702	650882	5978520	WRANGELLIA	Insular
300-495	22.3	1.6	1.6	K/Ar	Whole rock	Igneous cooling age	B	K/Ar Whole rock method unreliable	Hyndman, R.D. and Hamilton, T.S.	1991	1049	University of British Columbia; J. Harakal and K. Scott	Masset		Volcanic	rhyolite pitchstone, glassy with black and white phenocrysts;	British Columbia	Graham Island	103F	10	11834	53.743	132.515	663871	5957800	8	53.7433	132.513	663991	5957619	WRANGELLIA	Insular
GS-39-66	21.8	8	8	K/Ar	Whole rock	Igneous cooling age	B	K/Ar whole-rock method unreliable. Age reported as 21.4 Ma; recalibrated herein to IUGS decay constants	Young, I.F.	1981	1145	Kreuger Enterprises Ltd., Cambridge, Mass., for Pan-american Petroleum Corporation	Masset Tartu Facies, Mixed Member		Volcanic	Basalt	British Columbia	Graham Island	103F	10	12144	53.701	132.988	632825	5952141	8	53.7013	132.986	632945	5951959	WRANGELLIA	Insular
SD-252-N63	21	2	2	K/Ar	Whole rock	Igneous cooling age	B	K/Ar whole-rock method unreliable. Age reported as 20 Ma; recalibrated herein to IUGS decay constants	Young, I.F.	1981	1145	Shell Development Corporation, Houston, Texas	Masset Dana Facies		Volcanic	Basalt porphyry	British Columbia	Moresby Island	103B	11	12154	52.6898	131.389	338507	5840442	9	52.69	131.388	338613	5840244	WRANGELLIA	Insular
SD-544-N63	21	4	4	K/Ar	Whole rock	Igneous cooling age	B	K/Ar whole-rock method unreliable. Age reported as 20 Ma; recalibrated herein to IUGS decay constants	Young, I.F.	1981	1145	Shell Development Corporation, Houston, Texas	Masset Tartu Facies, Rhyolite Member		Volcanic	Rhyolite ash flow tuff	British Columbia	Graham Island	103F	9	12163	53.5277	132.355	675311	5934232	8	53.528	132.353	675432	5934051	WRANGELLIA	Insular
TMV-61.5	20.4	1.4	1.4	K/Ar	Whole rock	Igneous cooling age	B	K/Ar Whole rock method unreliable	Hyndman, R.D. and Hamilton, T.S.	1991	1049	University of British Columbia; J. Harakal and K. Scott	Masset		Volcanic	basalt	British Columbia	Hecate Strait	103G	5	11844	53.4098	131.918	306028	5921822	9	53.41	131.917	306138	5921627	WRANGELLIA	Insular
MR 8	20.3	1.4	1.4	K/Ar	Whole rock	Igneous cooling age	B	K/Ar whole-rock method unreliable. Age reported as 19.8 Ma; recalibrated herein to IUGS decay constants	Young, I.F.	1981	1145	University of British Columba	Masset Formation, Tartu Facies, Basalt Member		Volcanic	Basalt	British Columbia	Hecate Strait	103G	5	12151	53.4098	131.918	306028	5921822	9	53.41	131.917	306138	5921627	WRANGELLIA	Insular
18-44	20	1.4	1.4	K/Ar	Whole rock	Igneous cooling age	B	K/Ar Whole rock method unreliable	Hyndman, R.D. and Hamilton, T.S.	1991	1049	University of British Columbia; J. Harakal and K. Scott	Masset		Volcanic	basalt	British Columbia	Graham Island	103F	7	11832	53.4431	132.723	651202	5923972	8	53.4433	132.722	651323	5923790	WRANGELLIA	Insular
TMV-33	19	1.4	1.4	K/Ar	Whole rock	Igneous cooling age	B	K/Ar Whole rock method unreliable	Hyndman, R.D. and Hamilton, T.S.	1991	1049	University of British Columbia; J. Harakal and K. Scott	Masset		Volcanic	basalt, dark grey, fine grained	British Columbia	Dixon Entrance	103K	1	11842	54.108	132.37	671931	5998738	8	54.1083	132.368	672044	5998560	WRANGELLIA	Insular
193-1815	18.9	1.4	1.4	K/Ar	Whole rock	Igneous cooling age	B	K/Ar Whole rock method unreliable	Hyndman, R.D. and Hamilton, T.S.	1991	1049	University of British Columbia; J. Harakal and K. Scott	Masset		Volcanic	dacite, porphyritic	British Columbia	Graham Island	103F	10	11833	53.718	132.517	663859	5955015	8	53.7183	132.515	663979	5954834	WRANGELLIA	Insular
P-77.2.2 QF 9-10	18.3	1.4	1.4	K/Ar	Whole rock	Igneous cooling age	B	K/Ar whole-rock method unreliable	Armstrong, R.L.	0	1475	University of British Columbia; J. Harakal	block in Miocene melange;		Volcanic	felsite;	British Columbia	Ashcroft	92I	9	15811	50.6165	128.44	539620	5607325	9	50.6167	128.438	539737	5607130	WRANGELLIA	Insular
7805 D01	17.4	1	1	K/Ar	Whole rock	Mineralization age	B	K/Ar whole-rock method unreliable	Champigny, N. and Sinclair, A.J.	1980	1139	not reported	Haida Fm.		Sedimentary	Silicified shale, gold bearing, ~1% pyrite	British Columbia	Graham Island	103F	9	12109	53.5331	132.218	684346	5935171	8	53.5333	132.217	684466	5934989	WRANGELLIA	Insular
SD-250-N63	17.4	2	2	K/Ar	Whole rock	Igneous cooling age	B	K/Ar whole-rock method unreliable. Age reported as 17 Ma; recalibrated herein to IUGS standards using table in Dalrymple (1979)	Young, I.F.	1981	1145	Shell Development Corporation, Houston, Texas	Masset		Volcanic	Andesite	British Columbia	Hecate Strait	103G	4	12153	53.1131	131.639	323387	5888107	9	53.1133	131.637	323494	5887910	WRANGELLIA	Insular
Bella Bella_ste	16.3	0.9	0.9	Rb/Sr	Whole rock	Igneous crystallization age	A	8 samples in suite; MSWD not reported but scatter appears minimal.	Bevier, M.L.	1989	1247	University of British Columbia	Bella Bella formation		Volcanic	suite of 8 samples: 3 alkali olivine basalts, 4 comendites, 1 comenditic trachyte	British Columbia	Laredo Sound	103A	1	12902	52.1976	128.387	541885	5783196	9	52.1978	128.386	542000	5783000	WRANGELLIA	Coast
SE110384	15.4	1	1	K/Ar	K-Feldspar	Cooling 200°C	B	K/Ar feldspar method unreliable	Souther, J.G.	0	1061	University of British Columbia; J. Harakal and K. Scott	Tertiary pluton, Unit 16a, G.S.C. Map 1328A, Mem. 372;		Plutonic	granite	British Columbia	Laredo Sound	103A	1	11858	52.2265	128.375	542691	5786412	9	52.2267	128.373	542805	5786216	WRANGELLIA	Coast
SE110484	15.3	1	1	K/Ar	Hornblende	Cooling 500°C	A		Souther, J.G.	0	1061	University of British Columbia; J. Harakal and K. Scott	Tertiary pluton, Unit 16a, G.S.C. Map 1328A, Mem. 372;		Plutonic	granite	British Columbia	Laredo Sound	103A	1	11861	52.2381	128.437	538468	5787675	9	52.2383	128.435	538582	5787479	WRANGELLIA	Coast
SE110384	15.2	1.2	1.2	K/Ar	Hornblende	Cooling 500°C	A		Souther, J.G.	0	1061	University of British Columbia; J. Harakal and K. Scott	Tertiary pluton, Unit 16a, G.S.C. Map 1328A, Mem. 372;		Plutonic	granite	British Columbia	Laredo Sound	103A	1	11859	52.2265	128.375	542691	5786412	9	52.2267	128.373	542805	5786216	WRANGELLIA	Coast
WN-125-74	14.6	1.3	1.3	K/Ar	Whole Rock	Geological Error	C	K/Ar whole-rock method unreliable	Stevens, R.D., Delabio, R.N. and Lachance, G.R.	1982	92	Geological Survey of Canada (Ottawa)- GSC No: 81-80			Plutonic	Altered Felsite felsic dome intruding Wrangell lavas	Yukon	Kluane Lake	115G	3	273	61.1947	139.019	606495	6786086	7	61.195	139.017	606605	6785921	WRANGELLIA
SE110484	14.4	1.2	1.2	K/Ar	K-Feldspar	Cooling 200°C	B	K/Ar feldspar method unreliable	Souther, J.G.	0	1061	University of British Columbia; J. Harakal and K. Scott	Tertiary pluton, Unit 16a, G.S.C. Map 1328A, Mem. 372;		Plutonic	granite	British Columbia	Laredo Sound	103A	1	11860	52.2381	128.437	538468	5787675	9	52.2383	128.435	538582	5787479	WRANGELLIA	Coast
7906 D01	14.1	1.2	1.2	K/Ar	Whole rock	Mineralization age	B	K/Ar whole-rock method unreliable	Champigny, N. and Sinclair, A.J.	1980	1139	not reported	Post-tectonic intrusion.		Volcanic	Silicified rhyolite-porphyry, gold bearing, ~1% pyrite	British Columbia	Graham Island	103F	9	12110	53.5331	132.218	684346	5935171	8	53.5333	132.217	684466	5934989	WRANGELLIA	Insular
SAA-67-535	14	1	1	K/Ar	Whole rock	Igneous cooling age	B	K/Ar whole rock method unreliable. Age reported as 14.5 Ma; recalibrated herein to IUGS constants (S&J 1977)	Wanless, R.K., Stevens, R.D., Lachance, G.R. and Delabio, R.N.	1970	100	Geological Survey of Canada (Ottawa); Lab ID 67-31	Dyke related to map unit 10 or 13 GSC Map 9-1966,GSC Paper 66-25		Plutonic	Spherulitic gabbro, altered	British Columbia	Laredo Sound	103A	1	11579	52.1568	128.067	563793	5778890	9	52.157	128.066	563908	5778694	WRANGELLIA	Coast
22065 M	14	1.2	1.2	K/Ar	Whole rock	Mineralization age	B	K/Ar whole-rock method unreliable	Champigny, N. and Sinclair, A.J.	1980	1139	not reported			Volcanic	Silicified rhyolite, porphyritic, gold bearing, 1% pyrite	British Columbia	Graham Island	103F	9	12108	53.5331	132.218	684346	5935171	8	53.5333	132.217	684466	5934989	WRANGELLIA	Insular
SE1611G-84	13.3	1	1	K/Ar	Whole rock	Igneous cooling age	B	K/Ar Whole rock method unreliable	Souther, J.G.	0	1061	University of British Columbia; J. Harakal and K. Scott	dyke		Volcanic	tristanite, fine-grained, bit micro-porphyritic;	British Columbia	Laredo Sound	103A	1	11863	52.1698	128.113	560640	5780296	9	52.17	128.112	560755	5780100	WRANGELLIA	Coast
BBC 24	13.2	1.8	1.8	FT	Apatite	Cooling 110°C	A	Age revised from Parrish (1983)	O'Sullivan, P.B. and Parrish, R.R.	1995	1267	University of British Columbia; R. Parrish	Coast Plutonic Complex		Plutonic	quartz diorite	British Columbia	Bella Coola	93D	4	12960	52.1748	127.978	569887	5780974	9	52.175	127.976	570002	5780778	WRANGELLIA	Coast
163-225	13.1	1.4	1.4	K/Ar	Whole rock	Igneous cooling age	B	K/Ar Whole rock method unreliable	Hyndman, R.D. and Hamilton, T.S.	1991	1049	University of British Columbia; J. Harakal and K. Scott	Masset		Volcanic	rhyolite, grey, porphyritic	British Columbia	Graham Island	103F	10	11831	53.643	132.698	652143	5946269	8	53.6433	132.697	652263	5946088	WRANGELLIA	Insular
SE012688	13	5.7	5.7	K/Ar	Hornblende	Cooling 500°C	A		Irving, E., Souther, J.G. and Baker, J.	1992	1243	Geological Survey of Canada, Ottawa; J. Roddick	Selwyn Inlet dyke swarm		Volcanic	not reported	British Columbia	Moresby Island	103B	13	12882	52.8998	131.802	311564	5864797	9	52.9	131.8	311671	5864601	WRANGELLIA	Insular
RBP	13	24	24	FT	Apatite	Cooling 110°C	C	Error exceeds age - meaningless	Isachsen, C.E.	1987	1441	University of Briitsh Columbia; C. Isachsen	Catface Intrusion		Plutonic	quartz diorite	British Columbia	Alberni	92F	4	16296	49.2248	125.925	287052	5456564	10	49.225	125.923	287151	5456363	WRANGELLIA	Insular
SAA-67-486	12.8	2.7	2.7	K/Ar	Whole rock	Igneous cooling age	B	K/Ar whole rock method unreliable. Age reported as 12.5 Ma; recalibrated herein to IUGS constants (S&J 1977)	Wanless, R.K., Stevens, R.D., Lachance, G.R. and Delabio, R.N.	1970	100	Geological Survey of Canada (Ottawa); Lab ID 67-32	Dyke		Plutonic	Diabase slightly altered	British Columbia	Laredo Sound	103A	1	11578	52.2035	128.141	558715	5784018	9	52.2037	128.139	558830	5783822	WRANGELLIA	Coast
SE060284	12.6	1	1	K/Ar	Whole rock	Igneous cooling age	B	K/Ar Whole rock method unreliable.	Souther, J.G.	1986	1134	University of British Columba; J. Harakal and K. Scott	dyke		Volcanic	trachyte, fine-grained;	British Columbia	Laredo Sound	103A	1	12055	52.1581	128.115	560542	5778997	9	52.1583	128.113	560657	5778801	WRANGELLIA	Coast
SE2302C-84	12.1	1	1	K/Ar	Whole rock	Igneous cooling age	B	K/Ar Whole rock method unreliable	Souther, J.G.	0	1061	University of British Columbia; J. Harakal and K. Scott	dyke		Volcanic	comendite, fine-grained, micro-porphyritic	British Columbia	Laredo Sound	103A	1	11865	52.1931	128.132	559355	5782876	9	52.1933	128.13	559470	5782680	WRANGELLIA	Coast
SE2226A-84	11.9	1	1	K/Ar	Whole rock	Igneous cooling age	B	K/Ar Whole rock method unreliable	Souther, J.G.	0	1061	University of British Columbia; J. Harakal and K. Scott	dyke		Volcanic	alkali olivine basalt, fine-grained, sub-ophitic;	British Columbia	Laredo Sound	103A	1	11864	52.1965	128.137	559009	5783243	9	52.1967	128.135	559124	5783047	WRANGELLIA	Coast
SD-256-N63	11.3	6	6	K/Ar	Whole rock	Igneous cooling age	B	K/Ar whole-rock method unreliable. Age reported as 11 Ma; recalibrated herein to IUGS standards using table in Dalrymple (1979)	Young, I.F.	1981	1145	Shell Development Corporation, Houston, Texas	Masset Tartu Facies, Basalt member		Volcanic	Basalt porphyry	British Columbia	Dixon Entrance	103K	1	12156	54.0585	132.24	680609	5993557	8	54.0588	132.239	680723	5993378	WRANGELLIA	Insular
70-2130	11	1.4	1.4	K/Ar	Whole rock	Igneous cooling age	B	K/Ar Whole rock method unreliable	Hyndman, R.D. and Hamilton, T.S.	1991	1049	University of British Columbia; J. Harakal and K. Scott	Masset		Volcanic	rhyolite, pitchstone, black with tan rind;	British Columbia	Graham Island	103F	10	11837	53.5797	132.768	647737	5939077	8	53.58	132.767	647858	5938896	WRANGELLIA	Insular
SE071584	11	1	1	K/Ar	Hornblende	Cooling 500°C	A		Souther, J.G.	0	1061	University of British Columbia; J. Harakal and K. Scott	Shearwater stock		Plutonic	soda granite, medium grained;	British Columbia	Laredo Sound	103A	1	11855	52.1581	128.088	562366	5779020	9	52.1583	128.087	562481	5778824	WRANGELLIA	Coast
SE260584	10.8	1	1	K/Ar	Hornblende	Cooling 500°C	A		Souther, J.G.	0	1061	University of British Columbia; J. Harakal and K. Scott	dyke		Volcanic	hawaiite, coarsely porphyritic w. Na plag xts in plag+cpx+ol+opaques, w. minor devitified glass, 0.6	British Columbia	Laredo Sound	103A	1	11868	52.1981	128.387	541919	5783254	9	52.1983	128.385	542034	5783058	WRANGELLIA	Coast
4136H	10	0	9	K/Ar	Whole rock	Maximum age	B	Age reported as 10 Ma; recalibrated herein to IUGS decay constants but does not affect outcome of calc. at this level of precision. K/Ar whole-rock method unreliable	Young, I.F.	1981	1145	Shell Development Corporation, Houston, Texas	top of 40 + m section of basalt;		Volcanic	basalt porphyry	British Columbia	Queens Sound	102P	11	15347	51.6015	129.348	475886	5716772	9	51.6017	129.346	476001	5716574	WRANGELLIA	Insular
SE271584	9.1	0.8	0.8	K/Ar	Whole rock	Igneous cooling age	B	K/Ar Whole rock method unreliable	Souther, J.G.	0	1061	University of British Columbia; J. Harakal and K. Scott	dyke		Volcanic	comenditic glass w phenocrysts of alkspar & alk.px, 4.16%K2O;	British Columbia	Laredo Sound	103A	1	11869	52.1748	128.142	558695	5780829	9	52.175	128.14	558810	5780633	WRANGELLIA	Coast
SE0601B-84	8.9	0.8	0.8	K/Ar	Whole rock	Igneous cooling age	B	K/Ar Whole rock method unreliable	Souther, J.G.	0	1061	University of British Columbia; J. Harakal and K. Scott	Dyke		Volcanic	trachyte obsidian with microphenocrysts, AlKspar, Napx, 4.23%K2O	British Columbia	Laredo Sound	103A	1	11854	52.1581	128.115	560542	5778997	9	52.1583	128.113	560657	5778801	WRANGELLIA	Coast
MEKA 69-6B	8.4	0.7	0.7	K/Ar	Whole rock	Igneous cooling age	B	K/Ar whole-rock method unreliable. Age reported as 7.6 Ma; recalibrated herein to IUGS constants (S&J 1977)	Wanless, R.K., Stevens, R.D., Lachance, G.R. and Delabio, R.N.	1973	102	Geological Survey of Canada (Ottawa); Lab ID 73-2			Volcanic	basalt, trachytic texture, plag-cpx-opaque	British Columbia	Alert Bay	92L	11	13509	50.5081	127.25	624069	5596593	9	50.5083	127.249	624185	5596398	WRANGELLIA	Insular
MEKA 69-3	7.88	0.8	0.8	K/Ar	Whole rock	Igneous cooling age	B	K/Ar whole-rock method unreliable. Age reported as 7.9 Ma; recalibrated herein to IUGS constants (S&J 1977)	Wanless, R.K., Stevens, R.D., Lachance, G.R. and Delabio, R.N.	1974	103	Geological Survey of Canada (Ottawa); Lab ID 73-3			Volcanic	basalt, plag - cpx - opaque	British Columbia	Alert Bay	92L	11	13536	50.5011	127.264	623106	5595792	9	50.5013	127.263	623222	5595597	WRANGELLIA	Insular
69-7A1	7	6	6	K/Ar	Whole rock	Igneous cooling age	B	K/Ar whole-rock method unreliable. Excessive relative error.	Armstrong, R.L., Muller, J.E., Harakal, J.E. and Muehlenbachs, K.	1985	1426	University of British Columbia; J. Harakal and K. Scott			Volcanic	porphyritic basalt, plagiophyric;	British Columbia	Alert Bay	92L	11	15503	50.5865	127.195	627782	5605397	9	50.5867	127.193	627896	5605201	WRANGELLIA	Insular
SE071584	6.4	1	1	K/Ar	Feldspar	Cooling 200°C	B	K/Ar feldspar method unreliable	Souther, J.G.	0	1061	University of British Columbia; J. Harakal and K. Scott	Shearwater stock		Plutonic	soda granite, medium grained;	British Columbia	Laredo Sound	103A	1	11856	52.1581	128.088	562366	5779020	9	52.1583	128.087	562481	5778824	WRANGELLIA	Coast
SD-257-63	5.1	0	4.9	K/Ar	Whole rock	Maximum age	B	K/Ar whole-rock method unreliable. Age reported as 5 Ma; recalibrated herein to IUGS standards using table in Dalrymple (1979)	Young, I.F.	1981	1145	Shell Development Corporation, Houston, Texas	Post tectonic Pivot Mountain Pluton		Plutonic	Augite diorite	British Columbia	Dixon Entrance	103K	3	12157	54.0102	133.011	630326	5986488	8	54.0105	133.01	630440	5986307	WRANGELLIA	Insular
SD-546-N63	5.1	0	4.9	K/Ar	Whole rock	Maximum age	B	K/Ar whole-rock method unreliable. Age reported as 5 Ma; recalibrated herein to IUGS standards using table in Dalrymple (1979)	Young, I.F.	1981	1145	Shell Development Corporation, Houston, Texas	Tow Hill Sills		Volcanic	Olivine basalt	British Columbia	Prince Rupert	103J	4	12164	54.0785	131.796	317104	5995876	9	54.0788	131.794	317206	5995687	WRANGELLIA	Insular
69-227 F	4.7	0.4	0.4	K/Ar	Whole rock	Igneous cooling age	B	Age reported as 4.6 Ma; recalibrated herein to IUGS decay constants. K/Ar whole-rock method unreliable.	Armstrong, R.L., Muller, J.E., Harakal, J.E. and Muehlenbachs, K.	1985	1426	University of British Columbia; J. Harakal and K. Scott			Volcanic	basalt;	British Columbia	Alert Bay	92L	11	15499	50.5011	127.264	623106	5595792	9	50.5013	127.263	623222	5595597	WRANGELLIA	Insular
69-31D	4.3	0.8	0.8	K/Ar	Whole rock	Igneous cooling age	B	Age reported as 4.2 Ma; recalibrated herein to IUGS decay constants. K/Ar whole-rock method unreliable.	Armstrong, R.L., Muller, J.E., Harakal, J.E. and Muehlenbachs, K.	1985	1426	University of British Columbia; J. Harakal and K. Scott			Volcanic	basalt	British Columbia	Alert Bay	92L	11	15501	50.5131	127.207	627152	5597223	9	50.5133	127.205	627268	5597028	WRANGELLIA	Insular
68-49A	3.7	0.6	0.6	K/Ar	Whole rock	Igneous cooling age	B	Age reported as 3.6 Ma; recalibrated herein to IUGS decay constants. K/Ar whole-rock method unreliable.	Armstrong, R.L., Muller, J.E., Harakal, J.E. and Muehlenbachs, K.	1985	1426	University of British Columbia; J. Harakal and K. Scott			Volcanic	felsite, K-poor dacite	British Columbia	Alert Bay	92L	11	15496	50.5998	127.028	639540	5607181	9	50.6	127.027	639654	5606985	WRANGELLIA	Insular
69-23F2	3	1	1	K/Ar	Whole rock	Igneous cooling age	B	Age reported as 3.0 Ma; recalibrated herein to IUGS decay constants but does not affect outcome of calc. at this level of precision. K/Ar whole-rock method unreliable.	Armstrong, R.L., Muller, J.E., Harakal, J.E. and Muehlenbachs, K.	1985	1426	University of British Columbia; J. Harakal and K. Scott			Volcanic	felsite, tholeiitic rhyolite, K poor;	British Columbia	Alert Bay	92L	6	15500	50.4631	127.477	608125	5591234	9	50.4633	127.475	608240	5591040	WRANGELLIA	Insular
69-31F1	3	0.8	0.8	K/Ar	Whole rock	Igneous cooling age	B	Age reported as 3.0 Ma; recalibrated herein to IUGS decay constants but does not affect outcome of calc. at this level of precision. K/Ar whole-rock method unreliable.	Armstrong, R.L., Muller, J.E., Harakal, J.E. and Muehlenbachs, K.	1985	1426	University of British Columbia; J. Harakal and K. Scott			Volcanic	andesite;	British Columbia	Alert Bay	92L	11	15502	50.5165	127.252	623953	5597517	9	50.5167	127.25	624069	5597322	WRANGELLIA	Insular
69-18	2.5	0.2	0.2	K/Ar	Whole rock	Igneous cooling age	B	Age reported as 2.4 Ma; recalibrated herein to IUGS decay constants. K/Ar whole-rock method unreliable.	Armstrong, R.L., Muller, J.E., Harakal, J.E. and Muehlenbachs, K.	1985	1426	University of British Columbia; J. Harakal and K. Scott			Volcanic	felsite, K-poor dacite;	British Columbia	Alert Bay	92L	11	15497	50.5715	127.162	630183	5603788	9	50.5717	127.16	630297	5603592	WRANGELLIA	Insular
MLB-89-RC-1	0.54	0.02	0.02	K/Ar	Whole rock	Igneous cooling age	B	K/Ar whole-rock method unreliable.	Hunt, P.A. and Roddick, J.C.	1992	34	Geological Survey of Canada (Ottawa); Lab ID 92-29	Stikine Volcanic Belt		Volcanic	vesicular aphyric olivine basalt flow	British Columbia	Atlin	104N	11	11060	59.6814	133.34	593452	6617104	8	59.6817	133.338	593570	6616924	WRANGELLIA	Insular

## Sheet: Age_refs
refno	authors	year	title	journal	volume	start_page	end_page	ref_type
1	Abercrombie, S.M.	1990	Petrology, geochronometry and economic geology: the Zeta tin-silver prospect, Arsenic Ridge, west-central Yukon (115P/14 and 116A/03)	Unpublished M.Sc. thesis, University of British Columbia, Vancouver, British Columbia.	0	0	226	3
3	Baadsgaard, H., Folinsbee, R.E. and Lipson, J.	1961	Caledonian or Acadian granites of the northern Yukon Territory	Geology of the Arctic. ed. G.O. Raasch, University of Toronto Press.	1	458	465	2
5	Campbell, S.W.	1981	Geology and genesis of copper deposits and associated host rocks in and near Quill Creek, southwestern Yukon.	Unpublished Ph.D. thesis, University of British Columbia, Vancouver.	0	215	0	3
6	Carlson, G.E.	1987	Geology and Mount Nansen (115 I/3) and Stoddart Creek (115 I/6) map areas.	Exploration and Geological Services Division, Yukon, Indian and Northern Affairs Canada, Open File 1987-2.	0	179	0	3
7	Christopher, P.A.	1973	Application of K-Ar and fission track dating to the metallogeny of porphyry and related mineral deposits in the Canadian Cordillera.	Canadian Journal of Earth Sciences	10	846	851	1
8	Christopher, P.A., White, W.H. and Harakal, J.E.	1972	K-Ar dating of the "Cork" (Burwash Creek) Cu-Mo prospect, Burwash Landing area, Yukon Territory	Canadian Journal of Earth Sciences	9	918	921	1
9	Chronic, F.J.	1979	Geology of the Guano-Guayes rare earth element bearing skarn property, Pelly Mountains, Yukon Territory.	Unpublished M.Sc. thesis, University of British Columbia, Vancouver.	0	0	122	3
12	Downey, M.E., Armstrong, R.L. and Parrish, R.R.	1980	K-Ar, Rb-Sr and fission track geochronometry of the Bock's Brook stock, Kluane Ranges, southwestern Yukon Territory	Current Research, Part B, Geological Survey of Canada, Paper 80-1B.	0	189	193	2
13	Duke, J.L. and Godwin, C.I.	1986	Geology and alteration of the Grew Creek epithermal gold-silver prospect, south-central Yukon	Yukon Geology, Exploration and Geological Services Division, Yukon, Indian and Northern Affairs Canada.	1	72	82	2
14	Erdmer, P. and Armstrong, R.L.	1988	Permo-Triassic isotopic dates for blueschist, Ross River area, Yukon	Yukon Geology, Exploration and Geological Services Division, Yukon, Indian and Northern Affairs Canada.	2	33	36	2
16	Farrar, E., Clark, A.H., Archibald, D.A. and Way, D.C.	1988	Potassium-argon age of granitoid plutonic rocks, southwest Yukon Territory, Canada	Isochron/west	51	19	23	1
17	Godwin, C.I.	1975	Alternative interpretations for the Casino Complex and Klotassin Batholith in the Yukon Crystalline Terrane	Canadian Journal of Earth Sciences	12	1910	1916	1
18	Godwin, C.I. and Mortensen, J.K.	1978	Provisional Rb/Sr dates: CASH porphyry copper-molybdenum property, Y.T.	Department of Indian and Northern Affairs, 1977 Yukon Mineral Inventory Report.	0	25	26	2
19	Godwin, C.I., Harakal, J., Carne, R.C. and Mortensen, J.K.	1978	Geochronometric study of a Tertiary lamprophyre, Macmillan Pass, Y.T.	Department of Indian and Northern Affairs, 1977 Yukon Mineral Inventory Report	0	0	27	2
20	Godwin, C.I., Armstrong, R.L. and Tompson, K.M.	1980	K-Ar and Rb-Sr dating and the genesis of tungsten at the Clea tungsten skarn property, Selwyn Mountains, Yukon Territory	Canadian Institute of Mining and Metallurgy Bulletin	73	90	93	1
21	Godwin, C.I., Sinclair, A.J. and Ryan, B.D.	1982	Lead isotope models for the genesis of carbonate-hosted Zn-Pb, shale-hosted Ba-Zn-Pb, and silver-rich deposits in the northern Canadian Cordillera	Economic Geology	77	82	94	1
22	Grond, H.C., Churchill, S.J., Armstrong, R.L., Harakal, J.E. and Nixon, G.T.	1984	Late Cretaceous age of the Hutshi, Mount Nansen, and Carmacks groups, southwestern Yukon Territory and northwestern British Columbia	Canadian Journal of Earth Sciences	21	554	558	1
23	Hansen, V.L., Mortensen, J.K. and Armstrong, R.L.	1989	U-Pb, Rb-Sr, and K-Ar isotopic constraints for ductile deformation and related metamorphism in the Teslin suture zone, Yukon-Tanana terrane, south-central Yukon Territory	Canadian Journal of Earth Sciences	26	2224	2235	1
27	Htoon, M.	1981	Isotopic age determinations of some metamorphic and igneous rocks from Clinton Creek area, Yukon	Yukon Exploration and Geology 1979-80, Indian and Northern Affairs Canada (Whitehorse)	0	65	67	2
28	Hudson, T., Plafker, G. and Turner, D.L.	1977	Metamorphic rocks of the Yakutat-St. Elias area, south-central Alaska	U.S. Geological Survey, Journal of Research	5	173	184	2
29	Hunt, P.A. and Roddick, J.C.	1987	A compilation of K-Ar ages: report 17	Radiogenic Age and Isotopic Studies: Report 1, Geological Survey of Canada, Paper 87-2	0	143	210	2
30	Hunt, P.A. and Roddick, J.C.	1988	A compilation of K-Ar ages: report 18	Radiogenic Age and Isotopic Studies: Report 2, Geological Survey of Canada, Paper 88-2	0	127	153	2
31	Hunt, P.A. and Roddick, J.C.	1990	A compilation of K-Ar ages: report 19	Radiogenic Age and Isotopic Studies: Report 3, Geological Survey of Canada, Paper 89-2	0	153	190	2
32	Hunt, P.A. and Roddick, J.C.	1991	A compilation of K-Ar ages: report 20	Radiogenic Age and Isotopic Studies: Report 4, Geological Survey of Canada, Paper 90-2	0	113	143	2
33	Hunt, P.A. and Roddick, J.C.	1992	A compilation of K-Ar ages: report 21	Radiogenic Age and Isotopic Studies: Report 5, Geological Survey of Canada, Paper 91-2	0	207	261	2
34	Hunt, P.A. and Roddick, J.C.	1992	A compilation of K-Ar and 40Ar-39Ar ages: report 22	Radiogenic Age and Isotopic Studies: Report 6, Geological Survey of Canada, Paper 92-2	0	179	226	2
35	Hunt, P.A. and Roddick, J.C.	1993	A compilation of K-Ar and 40Ar-39Ar ages: report 23	Radiogenic Age and Isotopic Studies: Report 7, Geological Survey of Canada, Paper 93-2	0	127	154	2
37	Jackson, L.E., Gordey, S.P., Armstrong, R.L. and Harakal, J.E.	1986	Bimodal Paleogene volcanics near Tintina Fault, east-central Yukon, and their possible relationship to placer gold	Yukon Geology, Exploration and Geological Services Division, Yukon, Indian and Northern Affairs Canada	1	139	147	2
39	Kuran, V.M., Godwin, C.I. and Armstrong, R.L.	1982	Geology and geochronometry of the Scheelite Dome tungsten-bearing skarn property, Yukon Territory	Canadian Institute of Mining and Metallurgy Bulletin	75	137	142	1
40	Lambert, M.B.	1970	The Bennett Lake cauldron subsidence complex, British Columbia and Yukon Territory	Geological Survey of Canada, Bulletin	227	213	0	2
41	Lane, R.	1990	Geologic setting and petrology of the Proterozoic Ogilvie Mountain breccias of the Coal Creek inlier, southern Ogilvie Mountains, Yukon Territory.	Unpublished M.Sc. thesis, University of British Columbia, Vancouver.	0	0	0	3
42	LeCouteur, P.C. and Tempelman-Kluit, D.J.	1976	Rb/Sr ages and a profile of Sr87/Sr86 ratios for plutonic rocks across the Yukon Crystalline Terrane	Canadian Journal of Earth Sciences	13	319	330	1
43	Leech, G.B., Lowdon, J.A., Stockwell, C.H. and Wanless, R.K.	1963	Age determinations by the Geological Survey of Canada, report 4, isotopic ages	Geological Survey of Canada, Paper 63-17	0	1	121	2
46	Lowdon, J.A.	1960	Age determinations by the Geological Survey of Canada, report 1, isotopic ages	Geological Survey of Canada, Paper 60-17	0	51	0	2
47	Lowdon, J.A.	1961	Age determinations by the Geological Survey of Canada, report 2, isotopic ages	Geological Survey of Canada, Paper 61-17	0	127	0	2
48	Lowdon, J.A., Stockwell, C.H., Tipper, H.W. and Wanless, R.K.	1962	Age determinations by the Geological Survey of Canada, report 3, isotopic ages	Geological Survey of Canada, Paper 62-17	0	1	120	2
50	Mato, G., Ditson, G. and Godwin, C.I.	1983	Geology and geochronometry of tin mineralization associated with the Seagull batholith, south-central Yukon Territory	Canadian Institute of Mining and Metallurgy Bulletin	76	43	49	1
51	McAllister, S.G.	1980	A petrological study of the Seagull Batholith.	Unpublished B.Sc. thesis, Queen's University, Kingston	0	47	0	3
52	McDonald, B.W.D.	1990	Geology and genesis of the Mount Skukum epithermal gold-silver deposits, southwestern Yukon Territory (NTS 105D 3, 6)	Exploration and Geological Services Division, Bulletin 2	1	65	10	3
53	McInnes, B.I.A., Goodfellow, W.D., Crocket, J.H. and McNutt, R.H.	1988	Geology, geochemistry and geochronology of subvolcanic intrusions associated with gold deposits at Freegold Mountain, Dawson Range, Yukon	Current Research, Part E, Geological Survey of Canada, Paper 88-1E	0	137	151	2
54	Metcalfe, P. and Clark, G.S.	1983	Rb-Sr whole-rock age of the Klondike Schist, Yukon Territory	Canadian Journal of Earth Sciences	20	886	891	1
55	Morrison, G.W., Godwin, C.I. and Armstrong, R.I.	1979	Interpretation of isotopic ages and 87Sr/86Sr initial ratios for plutonic rocks in the Whitehorse map area, Yukon	Canadian Journal of Earth Sciences	16	1988	1997	1
56	Mortensen, J.K.	1982	Geological setting and tectonic significance of Mississippian felsic metavolcanic rocks in the Pelly Mountains, southeastern Yukon Territory	Canadian Journal of Earth Sciences	19	8	22	1
57	Mortensen, J.K. and Hart, C.J.R.	1992	unpublished	unpublished	0	0	0	4
58	Mortensen, J.K.	1988	Geology of southwestern Dawson map area (NTS 116 B,C)	Geological Survey of Canada, Open File 1927.	0	0	0	2
59	Mortensen, J.K.	1990	Geology and U-Pb geochronology of the Klondike District, west-central Yukon Territory	Canadian Journal of Earth Sciences	27	903	914	1
60	Mortensen, J.K.	1992	Pre-mid-Mesozoic tectonic evolution of the Yukon-Tanana Terrane, Yukon and Alaska	Tectonics	11	836	853	1
62	Mortensen, J.K.	1992	New U-Pb ages for the Slide Mountain Terrane in southeastern Yukon Territory	Radiogenic Age and Isotopic Studies: Report 5, Geological Survey of Canada, Paper 91-2	0	167	173	2
65	Mortensen, J.K. and Thompson, R.I.	1990	A U-Pb zircon-baddeleyite age for a differentiated mafic sill in the Ogilvie Mountains, west-central Yukon Territory	Radiogenic Age and Isotopic Studies: Report 3, Geological Survey of Canada, Paper 89-2	0	23	28	2
66	Mortensen, J.K. and Roddick, J.C.	1990	Miocene 40Ar/39Ar and K-Ar ages for basaltic volcanic rocks in southwestern Dawson map area, western Yukon Territory	Radiogenic Age and Isotopic Studies: Report 3, Geological Survey of Canada, Paper 89-2	0	17	22	2
70	Mortensen, J.K. and Hansen, V.L.	1992	U-Pb and 40Ar-39Ar geochronology of granodioritic orthogneiss in the western Pelly Mountains, Yukon Territory	Radiogenic Age and Isotopic Studies: Report 6, Geological Survey of Canada, Paper 92-2	0	125	128	2
71	Mortensen, J.K. and Hulbert, L.	1992	A U-Pb zircon age for a Maple Creek gabbro sill, Tatamagouche Creek area, southwest Yukon Territory	Radiogenic Age and Isotopic Studies: Report 5, Geological Survey of Canada, Paper 91-2	0	175	179	2
72	Murphy, D.C.	1997	Geology of the McQuesten River region, northern McQuesten and Mayo map areas, Yukon Territory (115P/14, 15, 16105M/13, 14)	Exploration and Geological Services Division, Yukon, Indian and Northern Affairs Canada, Bulletin 6	6	122	0	3
73	Naeser, N.D., Westgate, J.A., Hughes, O.L. and Pewe, T.L.	1982	Fission-track ages of late Cenozoic distal tephra beds in the Yukon Territory and Alaska	Canadian Journal of Earth Sciences	19	2167	2178	1
74	Norris, D.K. and Yorath, C.J	1981	The North American plate from the Arctic archipelago to the Romanzof Mountains	The Ocean Basins and Margins, Vol. 5, The Arctic Ocean, ed. A.E.M. Nairn, M. Churkin, Jr. and F.G. Stehli, Plenum Press	5	37	103	2
77	Parrish, R.R.	1981	Uplift rates of Mt. Logan, Y.T., and British Columbia's central Coast Mountains using fission track dating methods (abstract)	EOS Transactions of the American Geophysical Union	62	60	0	1
78	Parrish, R.R. and Bell, R.T.	1987	Age of the NOR breccia pipe, Wernecke Supergroup, Yukon Territory	Radiogenic Age and Isotopic Studies: Report 1, Geological Survey of Canada, Paper 87-2	0	39	42	2
79	Pearson, W.N. and Clark, A.H.	1979	The Minto copper deposit, Yukon Territory: a metamorphosed orebody in the Yukon Crystalline Terrane	Economic Geology	74	1577	1599	1
80	Pigage, L.C. and Anderson, R.G.	1985	The Anvil plutonic suite, Faro, Yukon Territory	Canadian Journal of Earth Sciences	22	1204	1216	1
81	Pride, M.J. and Clark, G.S.	1985	An Eocene Rb-Sr isochron for rhyolite plugs, Skukum area, Yukon Territory	Canadian Journal of Earth Sciences	22	1747	1753	1
82	Roddick, J.C., Quigg, F.B. and Hunt, P.A.	1992	Miscellaneous 40Ar-39Ar ages and analytical procedures	Radiogenic Age and Isotopic Studies: Report 6, Geological Survey of Canada, Paper 92-2	0	171	177	2
83	Roots, C.F.	1997	Geology of the Mayo map area, Yukon Territory (105M)	Exploration and Geological Services Division, Yukon, Indian and Northern Affairs Canada, Bulletin 7	7	82	82	3
84	Roots, C.F. and Parrish, R.R.	1988	Age of the Mount Harper volcanic complex, southern Ogilvie Mountains, Yukon	Radiogenic Age and Isotopic Studies: Report 2, Geological Survey of Canada, Paper 88-2	0	29	35	2
85	Sinclair, A.J., Bentzen, A. and McLeod, J.A.	1979	Geology of the White River native copper deposit, Yukon Territory	Indian and Northern Affairs Canada, Report QS-Y001-000-EE-A1.	0	0	0	2
86	Sinclair, A.J., Tessari, O.J. and Harakal, J.E.	1980	Age of Ag-Pb-Zn mineralization, Keno Hill - Galena Hill area, Yukon Territory	Canadian Journal of Earth Sciences	17	1100	1103	1
88	Smit, H., Armstrong, R.L. and van der Heyden, P.	1985	Petrology, chemistry and radiogenic isotope (K-Ar, Rb-Sr, and U-Pb) study of the Emerald Lake pluton, eastern Yukon Territory	Current Research, Part B, Geological Survey of Canada, Paper 85-1B	0	347	359	2
90	Stevens, R.A., Mortensen, J.K. and Hunt, P.A.	1993	U-Pb and 40Ar-39Ar geochronology of plutonic rocks from the Teslin suture zone, Yukon Territory	Radiogenic Age and Isotopic Studies: Report 7, Geological Survey of Canada, Paper 93-2	0	83	90	2
91	Stevens, R.D., Delabio, R.N. and Lachance, G.R.	1982	Age determinations and geological studies, K-Ar isotopic ages, report 15	Geological Survey of Canada, Paper 81-2.	0	0	0	2
92	Stevens, R.D., Delabio, R.N. and Lachance, G.R.	1982	Age determinations and geological studies, K-Ar isotopic ages, report 16	Geological Survey of Canada, Paper 82-2.	0	0	0	2
93	Stewart, J.P.	1983	Petrology and geochemistry of the intrusives spatially associated with the Logtung W-Mo prospect, south-central Yukon Territory.	Unpublished M.Sc. thesis, University of Toronto, Toronto	0	243	0	3
94	Sturrock, D.L., Armstrong, R.L. and Maxwell, R.B.	1980	Age and Sr isotopic composition of the Pyroxenite Creek ultramafic complex, southwestern Yukon Territory: an Alaskan-type ultramafic intrusion	Current Research, Part B, Geological Survey of Canada, Paper 80-1B	0	185	188	2
95	Tempelman-Kluit, D.J. and Wanless, R.K.	1980	Zircon ages for the Pelly Gneiss and Klotassin granodiorite in western Yukon	Canadian Journal of Earth Sciences	17	297	306	1
96	Wanless, R.K., Stevens, R.D., Lachance, G.R. and Rimsaite, J.Y.H.	1965	Age determinations and geological studies (part 1), isotopic ages, report 5	Geological Survey of Canada, Paper 64-17	0	0	126	2
97	Wanless, R.K., Stevens, R.D., Lachance, G.R. and Rimsaite, J.Y.H.	1966	Age determinations and geological studies, K-Ar isotopic ages, report 6	Geological Survey of Canada, Paper 65-17	0	0	0	2
98	Wanless, R.K., Stevens, R.D., Lachance, G.R. and Edmonds, C.M.	1967	Age determinations and geological studies, K-Ar isotopic ages, report 7	Geological Survey of Canada, Paper 66-17	0	0	0	2
99	Wanless, R.K., Stevens, R.D., Lachance, G.R. and Edmonds, C.M.	1968	Age determinations and geological studies, K-Ar isotopic ages, report 8	Geological Survey of Canada, Paper 67-2A	0	0	0	2
100	Wanless, R.K., Stevens, R.D., Lachance, G.R. and Delabio, R.N.	1970	Age determinations and geological studies, K-Ar isotopic ages, report 9	Geological Survey of Canada, Paper 69-2A	0	0	0	2
101	Wanless, R.K., Stevens, R.D., Lachance, G.R. and Delabio, R.N.	1972	Age determinations and geological studies, K-Ar isotopic ages, report 10	Geological Survey of Canada, Paper 71-2	0	0	0	2
102	Wanless, R.K., Stevens, R.D., Lachance, G.R. and Delabio, R.N.	1973	Age determinations and geological studies, K-Ar isotopic ages, report 11	Geological Survey of Canada, Paper 73-2	0	0	0	2
103	Wanless, R.K., Stevens, R.D., Lachance, G.R. and Delabio, R.N.	1974	Age determinations and geological studies, K-Ar isotopic ages, report 12	Geological Survey of Canada, Paper 74-2	0	0	0	2
104	Wanless, R.K., Stevens, R.D., Lachance, G.R. and Delabio, R.N.	1978	Age determinations and geological studies, K-Ar isotopic ages, report 13	Geological Survey of Canada, Paper 77-2	0	0	0	2
105	Wanless, R.K., Stevens, R.D., Lachance, G.R. and Delabio, R.N.	1979	Age determinations and geological studies, K-Ar isotopic ages, report 14	Geological Survey of Canada, Paper 79-2	0	0	0	2
106	Watson, P.H., Godwin, C.I. and Armstrong, R.L.	1981	Geology, mineralization, and K-Ar and Rb-Sr isotopic study of the Ram zinc-lead-silver property, Yukon Plateau, southwest Yukon Territory	Yukon Exploration and Geology 1979-80, Indian and Northern Affairs Canada (Whitehorse)	0	123	127	2
107	Wood, D.H. and Armstrong, R.L.	1982	Geology, chemistry, and geochronometry of the Cretaceous South Fork Volcanics, Yukon Territory	Geological Survey of Canada, Current Research, Part A, Paper 82-1A	0	309	316	2
109	Anderson, R.G. and Armstrong, R.L.	0	unpublished	unpublished	0	0	0	4
110	Armstrong, R.L. and Dawson, K.M.	0	unpublished	unpublished	0	0	0	4
111	Godwin, C.I. and Armstrong, R.L.	0	unpublished	unpublished	0	0	0	4
112	Baadsgaard, H.	1988	unpublished	unpublished	0	0	0	4
113	Souther, J.G. and Armstrong, R.L.	1974	unpublished	unpublished	0	0	0	4
114	Bevier, M.L., Anderson, R.G. and Theriault, R.J.	1986	unpublished	unpublished	0	0	0	4
115	Bremner, T.	1991	Mount Byng mineral occurrence.	Yukon Geology 1990, Exploration and Geological Services Division, Yukon, Indian and Northern Affairs Canada	0	52	56	2
116	Patterson, I. and Armstrong, R.L.	0	unpublished	unpublished	0	0	0	4
117	Mortensen, J.K. and Gordey, S.P.	1987	unpublished	unpublished	0	0	0	4
118	Mortensen, J.K. and Jackson, L.E.	1989	unpublished	unpublished	0	0	0	4
119	Johnston, S.T., Mortensen, J.K. and Erdmer, P.	1996	Igneous and metaigneous age constraints for the Aishihik metamorphic suite, southwest Yukon	Canadian Journal of Earth Sciences	33	1543	1555	1
120	Mortensen, J.K. and Pigage, L.C.	0	unpublished	unpublished	0	0	0	4
121	Mortensen, J.K., Grapes, K.J. and Jonasson, I.R.	1987	unpublished	unpublished	0	0	0	4
123	Eaton, D. and Armstrong, R.L.	1980	unpublished	unpublished	0	0	0	4
124	Mortensen, J.K. and Carlson, G.E.	1986	unpublished	unpublished	0	0	0	4
126	Hart, C.J.R.	1994	Magmatic and tectonic evolution of the Intermontane Superterrane and Coast Plutonic Complex in southern Yukon Territory	Unpublished M.Sc. thesis, University of British Columbia, Vancouver, British Columbia	0	198	0	3
127	Mortensen, J.K.	1983	unpublished	unpublished	0	0	0	4
128	Parrish, R.R.	1981	unpublished	unpublished	0	0	0	4
129	Roots, C., Liverton, T., and Heaman, L.	2003	Geology and U-Pb zircon geochronology of upper Dorsey assemblage near the TBMB claims, upper Swift River area, southern Yukon	Yukon Exploration and Geology 2002, Exploration and Geological Services Division, Yukon Region, Indian and Northern Affairs Canada	0	199	212	2
130	Mortensen, J.K.	1989	unpublished	unpublished	0	0	0	4
131	Medford, G. and Armstrong, R.L.	0	unpublished	unpublished	0	0	0	4
132	Debicki, R.L.	1985	unpublished	unpublished	0	0	0	4
133	Ghosh, D.K. and Armstrong, R.L.	1988	unpublished	unpublished	0	0	0	4
134	Archibald, D.A., Clark, A.H., Farrar, E. and Khin Zaw, U.	1978	Potassium-argon ages of intrusion and scheelite mineralization, Cantun, Tungsten, Northwest Territories	Canadian Journal of Earth Sciences	15	1205	1207	1
135	Klassen, R.W.	1987	The Tertiary Pleistocene stratigraphy of the Liard Plain, southeastern Yukon Territory	Geological Survey of Canada, Paper 86-17	0	16	0	2
136	Hansen, W.L., Heizler, M.T. and Harrison, T.M.	1991	Mesozoic thermal evolution of the Yukon-Tanana composite terrane: New evidence from 40Ar/39Ar data	Tectonics	10	51	76	1
139	Jackson, L.E.	1989	Pleistocene subglacial volcanism near Fort Selkirk, Yukon Territory	Geological Survey of Canada, Paper 89-1E	0	251	256	2
140	Tempelman-Kluit, D.J. and Wanless, R.K	1975	Potassium-argon age determinations of metamorphic and plutonic rocks in the Yukon Crystalline Terrane	Canadian Journal of Earth Sciences	5	375	386	1
141	Ross, G.M. and Harms, T.A.	1998	Detrital zircon geochronology of sequence 'C' grits, Dorsey Terrane (Thirtymile Range, Southern Yukon): provenance and stratigraphic correlation	Radiogenic Age and Isotopic Studies: Report 11, Geological Survey of Canada, Current Research 1998-F	0	107	115	2
142	Gordey, S.P., McNicoll, V.J. and Mortensen, J.K.	1998	New U-Pb ages from the Teslin area, southern Yukon, and their bearing on terrane evolution in the northern Cordillera	Radiogenic Age and Isotopic Studies: Report 11; Geological Survey of Canada, Current Research 1998-F	0	129	148	2
143	Heffernan, S. and Mortensen, J.K.	2000	Age, geochemical and metallogenic investigations of Cretaceous intrusions in southeastern Yukon and southwestern NWT: A preliminary report	Yukon Exploration and Geology 1999, D.S. Emond and L.H. Weston (eds.), Exploration and Geological Services Division, Yukon, Indian and Northern Affairs Canada	0	145	149	2
144	Hart, C.J.R. and Gabites, J.	0	unpublished	unpublished	0	0	0	4
145	Sandhu, A.S., Westgate, J.A., Preece, S.J. and Froese, D.G.	2001	Glass-fission-track ages of Late Cenozoic distal tephra beds in the Klondike district, Yukon Territory	Yukon Exploration and Geology 2000, Exploration and Geological Services Division, Yukon, Indian and Northern Affairs Canada	0	247	256	2
146	Francis, D.	1996	unpublished	unpublished	0	0	0	4
147	Liverton, T., Thirlwall, M.F. and McClay, K.R.	2001	Tectonic significance of plutonism in the Thirtymile Range, southern Yukon	Yukon Exploration and Geology 2000, Exploration and Geological Services Division, Yukon, Indian and Northern Affairs Canada	0	171	180	2
148	Lewis, J. and Mortensen, J.K.	1998	Geology, alteration and mineralization of the Sato porphyry copper prospect, southwestern Yukon	Yukon Exploration and Geology 1997, Exploration and Geological Services Division, Yukon, Indian and Northern Affairs Canada	0	153	160	2
149	Oliver, D.H. and Mortensen, J.K.	1998	Stratigraphic succession and U-Pb geochronology from the Teslin suture zone, south-central Yukon	Yukon Exploration and Geology 1997, Exploration and Geological Services Division, Yukon, Indian and Northern Affairs Canada	0	69	75	2
150	Doherty, R.L. and Hart, C.J.R.	1988	Preliminary geology of Fenwick Creek (105D/3) and Alligator Lake (105D/6) map areas	Indian and Northern Affairs Canada, Yukon Region, Open File 1988-2			65	3
151	Hunt, P.A. and Roddick, J.C.	1994	A compilation of K-Ar and 40Ar-39Ar ages; Report 24	Radiogenic age and isotopic studies; Report 8; Geological Survey of Canada Current Research 1994-F	0	125	155	2
152	Rainbird, R.H., McNicoll, V.J., Theriault, R.J., Heaman, L.M., Abbott, J.G., Long, D.G.F. and Thorkelson, D.J.	1997	Pan-continental river system draining Grenville Orogen recorded by U-Pb and Sm-Nd geochronology of Neoproterozoic quartzarenites and mudrocks, northwestern Canada	Journal of Geology	105	1	17	1
153	Philippot, P., Blichert-Toft, J., Perchuk, A., Costa, S. and Gerasimov, V.	2001	Lu-Hf and Ar-Ar chronometry supports extreme rate of subduction zone metamorphism deduced from geospeedometry	Tectonophysics	342	23	38	1
154	Thorkelson, D.J., Mortensen, J.K., Davidson, G.J., Creaser, R.A., Perez, W.A. and Abbott, J.G.	2001	Early Mesoproterozoic intrusive breccias in Yukon, Canada; the role of hydrothermal systems in reconstructions of North America and Australia	Precambrian Research	111	31	55	1
155	Hart, C.J.R., Dickie, J.R., Ghosh, D.K. and Armstrong, R.L.	1995	Provenance constraints for Whitehorse Trough conglomerate; U-Pb zircon dates and initial Sr ratios of granitic clasts in Jurassic Laberge Group, Yukon Territory	Jurassic magmatism and tectonics of the North American Cordillera, Geological Society of America Special Paper 299	0	47	63	2
156	Selby, D., Nesbitt, B.E., Creaser, R.A., Reynolds, P.H. and Muehlenbachs, K.	2001	Evidence for a nonmagmatic component in potassic hydrothermal fluids of porphyry Cu-Au-Mo systems, Yukon, Canada	Geochimica Cosmochimica Acta	65	571	587	1
157	OSullivan, P.B. and Lane, L.S.	1997	Early Tertiary thermotectonic history of the northern Yukon and adjacent Northwest Territories, Arctic Canada	Canadian Journal of Earth Sciences	34	1366	1378	1
158	Love, D.A., Clark, A.H., Hodgson, C.J., Mortensen, J.K., Archibald, D.A. and Farrar, E.	1998	The timing of adularia-sericite-type mineralization and alunite-kaolinite-type alteration, Mount Skukum epithermal gold deposit, Yukon Territory, Canada; 40Ar- 39Ar and U-Pb geochronology	Economic Geology	93	437	462	1
159	OSullivan, P.B. and Currie, L.D.	1996	Thermotectonic history of Mt Logan, Yukon Territory, Canada; implications of multiple episodes of middle to late Cenozoic denudation	Earth and Planetary Science Letters	144	251	261	1
160	Hart, C.J.R. and Villeneuve, M.	1999	Geochronology of Neogene alkaline volcanic rocks (Miles Canyon Basalt), southern Yukon Territory, Canada; the relative effectiveness of laser 40Ar/39Ar and K-Ar geochronology	Canadian Journal of Earth Sciences	36	1495	1507	1
163	Skulski, T., Francis, D. and Ludden, J.	1992	Volcanism in an arc-transform transition zone; the stratigraphy of the St. Clare Creek volcanic field, Wrangell volcanic belt, Yukon, Canada	Canadian Journal of Earth Sciences	29	446	461	1
165	Mortensen, J.K., Appel, V.L. and Hart, C.J.R.	2003	Geological and U-Pb age constraints on base and precious metal vein systems in the Mount Nansen area, eastern Dawson Range, Yukon	Yukon Exploration and Geology 2002, Exploration and Geological Services Division, Yukon Region, Indian and Northern Affairs Canada	0	165	174	2
166	Creaser, R.A., Heaman, L.M. and Erdmer, P.	1997	Timing of high-pressure metamorphism in the Yukon-Tanana Terrane, Canadian Cordillera; constraints from U-Pb zircon dating of eclogite from the Teslin tectonic zone	Canadian Journal of Earth Sciences	34	709	715	1
167	Oliver, D.H.	1996	Structural, kinematic, and thermochronometric studies of the Teslin Suture Zone, south-central Yukon Territory	Unpublished Ph.D. thesis, Texas University, Austin, Texas	0	231	1344	3
168	Piercey, S.J.	2001	Petrology and tectonic setting of felsic and mafic volcanic and intrusive rocks in the Finlayson Lake volcanic-hosted massive sulphide (VHMS) district, Yukon, Canada: A record of Mid-Paleozoic arc and back-arc magmatism and metallogeny	Unpublished Ph.D. Thesis, University of British Columbia, Vancouver	35	304	0	3
169	Erdmer, P., Ghent, E.D., Archibald, D.A. and Stout, M.Z.	1998	Paleozoic and Mesozoic high-pressure metamorphism at the margin of ancestral North America in central Yukon	Geological Society of America Bulletin	110	615	629	1
170	Roots, C.F. and Heaman, L.	2001	Mississippian U-Pb dates from Dorsey Terrane assemblages in the upper Swift River area, southern Yukon Territory	Geological Survey of Canada, Current Research 2001-A1	0	1	16	2
171	Abbott, G.	1997	Geology of the Upper Hart River Area, Eastern Ogilvie Mountains, Yukon Territory (116A/10, 116A/11)	Exploration and Geological Services Division, Yukon, Indian and Northern Affairs Canada, Bulletin 9	0	0	0	3
172	Thorkelson, D.J.	2000	Geology and mineral occurrences of the Slats Creek, Fairchild Lake and "Dolores Creek" areas, Wernecke Mountains (106D/16, 106C/13, 106C/14)	Exploration and Geological Services Division, Yukon, Indian and Northern Affairs Canada, Bulletin 10	10	0	0	3
173	Hart, C.J.R.	1997	A transect across Northern Stikinia: Geology of the Northern Whitehorse Map Area, Southern Yukon Territory (105D/13-16)	Exploration and Geological Services Division, Yukon, Indian and Northern Affairs Canada, Bulletin 8	8	105	0	3
174	Gallagher, C., Carr, S.D. and Brown, R.L.	1999	U-Pb geochronologic evidence of Early Cretaceous large-scale folding in teh Dycer Creek area, Pelly Mountains, Yukon	Lithoprobe Slave-Northern Cordillera Lithospheric Evolution (SNORCLE) Transect and Cordilleran Tectonics Tectonics Workshop Meeting (March 5-7), University of Calgary, Lithoprobe Report No.69	0	237	249	2
175	Fallas, K.M., Erdmer, P., Creaser, R.A., Archibald, D.A. and Heaman, L.M.	1999	New terrane interpretation for hte St. Cyr Klippe, south-central Yukon	Lithoprobe Slave-Northern Cordillera Lithospheric Evolution (SNORCLE) Transect and Cordilleran Tectonics Tectonics Workshop Meeting (March 5-7), University of Calgary, Lithoprobe Report No.69	0	130	137	1
176	Grant, S.L.	1997	Geochemical, radiogenic tracer isotopic, and U-Pb geochronological studies of Yukon Tanana terrane rocks from the Money klippe, southeastern Yukon, Canada	Unpublished M.Sc. thesis, University of Alberta, Edmonton	0	177	0	3
177	Goodwin-Bell, J.S.	1998	A geochemical and Sm-Nd isotopic study of Cordilleran eclogites from the Yukon-Tanana terrane	Unpublished M.Sc. thesis, University of Alberta, Edmonton	0	127	0	3
178	Bremner, T.	1991	Reed Creek mineral occurrence	Yukon Geology 1990, Exploration and Geological Services Division, Yukon, Indian and Northern Affairs Canada	0	60	64	2
179	Bremner, T. and Armstrong, R.	1987	Unpublished	unpublished	0	0	0	4
180	Dickie, J.R., Grist, A.M. and Donelick, R.A.	1992	Differential uplift across the Coast Plutonic Complex-Northern Stikine Terrane contact, Yukon: preliminary evidence from apatite fission-track thermochronometry	Yukon Geology, Vol. 3: Exploration and Geological Services Division, Yukon, Indian and Northern Affairs Canada	0	160	166	2
181	Dodds, C.J. and Campbell, R.B.	1988	Potassium-argon ages of mainly intrusive rocks in the Saint Elias Mountains, Yukon and British Columbia	Geological Survey of Canada Paper 87-16	0	43	0	3
182	Schwab, D.L., Thorkelson, D.J., Mortensen, J.K., Creaser, R.A., and Abbott, J.G.	2004	[IN PRESS] The Bear River dykes (1265-1269 Ma): westward continuation of the Mackenzie dyke swarm into Yukon, Canada	Precambrian Research	0	0	0	1
183	Kunk, M.J.	1995	40Ar/39Ar age-spectrum data for hornblende, plagioclase and biotite from tephras collected at Dan Creek and McCallum Creek, Alaska and in the Klondike Placer district near Dawson, Yukon Territory, Canada	U.S. Geological Survey Open-File Report 95-217A	0	52	0	3
184	Thorkelson, D.J., Mortensen, J.K., Creaser, R.A., Davidson, G.J. and Abbott, J.G.	2001	Early Proterozoic magmatism in Yukon, Canada: constraints on the evolution of northwestern Laurentia	Canadian Journal of Earth Sciences	38	1479	1494	1
185	Selby, D. and Creaser, R.A.	2001	Late and Mid-Cretaceous mineralization in the northern Canadian Cordillera: constraints from Re-Os molybdenite dates	Economic Geology	96	1461	1467	1
186	Gareau, S.A.	1986	Petrology and geochronology of the Gun Claim pluton and its aureole, eastern Selwyn Basin, Yukon Territory	unpublished B.Sc. thesis, University of British Columbia, Vancouver, British Columbia	0	97	0	3
187	Lowey, G.W., Sinclair, W.D. and Hills, L.V.	1986	Additional K-Ar isotopic dates for the Carmacks Group (Upper Cretaceous), west central Yukon	Canadian Journal of Earth Sciences	23	1857	1859	1
188	Fonseca, A.	1998	Origin of carbonate hosted gold rich replacement deposits and related mineralization styles in the Ketza River Deposit, Yukon Territory	Unpublished M.Sc. thesis, University of British Columbia, Vancouver, British Columbia	0	137	0	3
189	Huscroft, C.A.	2002	Late Cenozoic history of the Yukon River Valley, Fort Selkirk to the Stevenson Ridge map Area, Yukon Territory	Unpublished M.Sc. thesis, Simon Fraser University, Burnaby, British Columbia	0	0	0	3
190	Mezger, J.E.	1997	Tectonometamorphic evolution of the Kluane Metamorphic Assemblage, SW Yukon: evidence for Late Cretaceous eastward subduction of the oceanic crust underneath North America	Unpublished Ph.D. thesis, University of Alberta, Edmonton, Alberta	0	0	0	3
191	De Keijzer, M., Williams, P.F. and Carr, S.D.	2000	Reflections on Lithoprobe-SNORCLE Line 31 in light of the structure of the Teslin zone in the Last Peak area (NTS map 105E/9), southern Yukon Territory	Lithoprobe Slave-Northern Cordillera Lithospheric Evolution (SNORCLE) Transect and Cordilleran Tectonics Workshop Meeting (February 25-27), University of Calgary, Lithoprobe Report No.72.	0	114	121	2
192	Lowey, G.W.	2000	The Tatshenshini shear zone (new) in southwestern Yukon, Canada: Comparison with the Coast shear zone in British Columbia and southeastern Alaska and implications regarding the Shakwak suture	Tectonics	19	512	528	1
193	Jackson, L.E., Barendregt, R.W., Baker, J. and Irving, E.	1996	Early Pleistocene volcanicsm and glaciation in central Yukon: a new chronology from field studies and paleomagnetism	Canadian Journal of Earth Sciences	33	904	916	1
194	Johnston, S.T.	1995	Geology compilation with interpretation from geophysical surveys of the northern Dawson Range (115J 9/10 and 115I /12), central Yukon	Exploration and Geological Services Division, Yukon, Indian and Northern Affairs Canada, Open File 1995-2				3
195	Joyce, N.L.	2002	Geologic setting, nature, and structural evolution of intrusion-hosted longline Au-bearing quartz veins, Moosehorn Range Area, west-central Yukon Territory	Unpublished M.Sc. thesis, University of British Columbia, Vancouver, British Columbia	0	196	0	3
196	Love, D.A.	1997	The Mount Skukum epithermal gold deposit and its geological setting, Yukon Territory, Canada	Unpublished Ph.D. thesis, Queen's University, Kingston, Ontario	0	406	0	3
197	Westgate, J.A.	1989	Isothermal plateau fission-track ages of hydrated glass shards from silicic tephra beds	Earth and Planetary Science Letters	95	226	234	1
198	Mortensen, J.K. and Erdmer, P.	1992	U-Pb, 40Ar-39Ar, and K-Ar ages for metamorphism of the Kluane and Aishihik assemblages in southwestern Yukon Territory	Radiogenic age and isotopic studies, Report 6; Geological Survey of Canada, Paper 92-2	0	135	140	2
199	Papageorge, M.L.	1997	Geology and mineralogy of the Heidi Property, Yukon Territories, Canada	Unpublished B.Sc. thesis, University of British Columbia, Vancouver	0	66	0	3
202	Coulson, I.M., Villeneuve, M.E., Dipple, G.M., Duncan, R.A., Russell, J.K. and Mortensen, J.K.	2002	Time-scales of assembly and thermal history of a composite felsic pluton: constraints from the Emerald Lake area, northern Canadian Cordillera, Yukon	Journal of Volcanology and Geothermal Research	114	331	356	1
203	Villeneuve, M.E.	2002	Unpublished	unpublished	0	0	0	4
204	Mortensen, J.K.	2004	Unpublished	IN PREP [for] Geological Society of America Bulletin	0	0	0	4
205	Parrish, R.R. and Reichenbach, I.	1991	Age of xenocrystic zircon from diatremes of western Canada	Canadian Journal of Earth Sciences	28	1232	1238	1
206	Jefferson, C.W. and Parrish, R.R.	1989	Late Proterozoic stratigraphy, U-Pb zircon ages, and rift tectonics, Mackenzie Mountains, northwestern Canada	Canadian Journal of Earth Sciences	26	1784	1801	1
207	Ross, G.M. and Villeneuve, M.E.	1997	U-Pb geochronology of stranger stones in Neoproterozoic diamictites, Canadian Cordillera: implications for provenance and ages of deposition	Radiogenic age and isotopic studies, Report 10; Geological Survey of Canada, Paper 1997-F		141	155	2
208	Smuk, K.A., Williams-Jones, A.E. and Francis, D.	1997	The Carmacks hydrothermal event: an alteration study in the southern Dawson Range, Yukon	Yukon Exploration and Geology 1996, Exploration and Geological Services Division, Yukon, Indian and Northern Affairs Canada		92	106	2
209	Armstrong, R.L., Eisbacher, G.H. and Evans, P.D.	1982	Age and stratigraphic-tectonic significance of Proterozoic diabase sheets, Mackenzie Mountains, northwestern Canada	Canadian Journal of Earth Sciences	19	316	323	1
210	Erdmer, P. and Baadsgaard, H.	1987	2.2 Ga age of zircons in three occurrences of Upper Proterozoic clastic rocks of the northern Cassiar terrane, Yukon and British Columbia	Canadian Journal of Earth Sciences	24	1919	1924	1
211	Archer, A., Bell, R.T. and Thorpe, R.I.	1986	Age relationships from U-Th-Pb isotope studies of uranium mineralization in Wernecke breccias, Yukon Territory	Geological Survey of Canada, Current Research Paper 86-1A		385	391	2
212	Westgate, J.A., Sandhu, A.S., Preece, S.J. and Froese, D.G.	2003	Age of the gold-bearing White Channel Gravel, Klondike district, Yukon	Yukon Exploration and Geology 2002, Exploration and Geological Services Division, Yukon Region, Indian and Northern Affairs Canada		241	25	2
213	Huscroft, C.A., Ward, B.C., Barendregt, R.W., Jackson, L.E., and Opdyke, N.D.	2004	Pleistocene volcanic damming of Yukon River and the maximum age of the Reid Glaciation, west-central Yukon	Canadian Journal of Earth Sciences	41	141	164	1
214	Marsh, E.E., Goldfarb, R.J., Hart, C.J.R., and Johnson, C.A.	2003	Geology and geochemistry of the Clear Creek intrusion-related gold occurrences, Tintina Gold Province, Yukon, Canada	Canadian Journal of Earth Sciences	40	681	699	1
215	Selby, D., Creaser, R.A., Heaman, L.M. and Hart, C.J.R.	2003	Re-Os and U-Pb geochronology of the Clear Creek, Dublin Gulch, and Mactung deposits, Tombstone Gold Belt, Yukon, Canada: absolute timing relationships between plutonism and mineralization	Canadian Journal of Earth Sciences	40	1839	1852	1
216	Westgate, J.A., Preece, S.J., Froese, D.G., Walter, R.C., Sandhu, A.S., and Schweger, C.E.	2001	Dating Early and Middle (Reid) Pleistocene glaciations in Central Yukon by tephrochronology	Quaternary Research	56	335	348	1
217	Thorkelson, D.J., Abbott, J.G., Mortensen, J.K., Creaser, R.A., Villeneuve, M.E., McNicoll, V.J. and Layer, P.W.	2004	[IN PRESS] Early and Middle Proterozoic evolution of Yukon, Canada	Canadian Journal of Earth Sciences	0	0	0	1
218	Mauthner, M.H.F., Mortensen, J.K., Groat, L.A. and Ercit, T.S.	1995	Geochronology of the Little Nahanni pegmatite group, Selwyn Mountains, southwestern Northwest Territories	Canadian Journal of Earth Sciences	32	2090	2097	1
219	Miller, J.L.P.	2004	U-Pb age and petrography of the ARN skarn occurrence in southwestern Yukon and the nature of contained gold	Unpublished B.Sc. thesis, University of British Columbia, Vancouver, British Columbia			30	3
1001	Hunt, P.A. and Roddick, J.C.	1996	A compilation of 40Ar-39Ar and K-Ar ages: Report 25	Radiogenic age and isotopic studies; Report 9; Geological Survey of Canada, Current Research, Paper 1995-F	0	57	74	2
1002	Evenchick, C.A. and McNicoll, V.J.	1993	U-Pb ages for Late Cretaceous and early Tertiary plutons in the Skeena Fold Belt, north-central British Columbia	Radiogenenic Age and Isotopic Studies Report 7, Geological Survey of Canada, Paper 93-2		99	106	2
1003	Ross, G.M., McNicoll, V.J., Geldsetzer, H.H.J., Parrish, R.R., Carr, S.D. and Kinsman, A.	1993	Detrital zircon geochronology of Siluro-Devonian sandstones, Rocky Mountains, northeastern British Columbia	Bulletin of Canadian Petroleum Geology	41	349	357	1
1004	Mortensen, J.K., Ghosh, D.K. and Ferri, F.	1995	U-Pb geochronology of intrusive rocks associated with copper-gold porphyry deposits in the Canadian Cordillera	Porphyry deposits of the Northwestern Cordillera of North America, CIM Special Volume 46		142	158	2
1005	Armstrong, R.L., Monger, J.W.H. and Irving, E.	1985	Age of magnetization of the Axelgold Gabbro, north-central British Columbia	Canadian Journal of Earth Sciences	22	1217	1222	1
1006	Gehrels, G.E., McClelland, W.C., Samson, S.D., Patchett, P.J. and Brew, D.A.	1991	U-Pb geochronology of Late Cretaceous and early Tertiary plutons in the northern Coast Mountains batholith	Canadian Journal of Earth Sciences	28	899	911	1
1007	McClelland, W.C. and Mattinson, J.M.	1996	Resolving high precision U-Pb ages from Tertiary plutons with complex zircon systematics	Geochimica et Cosmochimica Acta	60	3955	3965	1
1008	Symons, D.T.A., Harris, M.J., Gabites, J.E. and Hart, C.J.R.	2000	Eocene (51 Ma) end to northward translation of the Coast Plutonic Complex: paleomagnetism and K-Ar dating of the White Pass Dikes	Tectonophysics	326	93	109	1
1009	Childe, F.C. and Thompson, J.F.H.	1997	Geological setting, U-Pb geochronology, and radiogenic isotopic characteristics of the Permo-Triassic Kutcho Assemblage, north-central British Columbia	Canadian Journal of Earth Sciences	34	1310	1324	1
1010	Thorkelson, D.J., Mortensen, J.K., Marsden, H., and Taylor, R.P.	1995	Age and tectonic setting of Early Jurassic episodic volcanism along the northeastern margin of the Hazelton Trough, northern British Columbia	Jurassic magmatism and tectonics of the North American Cordillera: Geological Society of America Special Paper	299	83	94	2
1011	Mihalynuk, M.G., Smith, M.T., Gabites, J.E., Runkle, D. and Lefebure, D.	1992	Age of emplacement and basement character of the Cache Creek terrane as constrained by new isotopic and geochemical data	Canadian Journal of Earth Sciences	29	2463	2477	1
1012	Plint, H.E., and Parrish, R.R.	1994	U-Pb geochronology in the Horseranch Range, northern Omineca Belt, British Columbia, Canada	Canadian Journal of Earth Sciences	31	341	350	1
1013	Currie, L.D. and Parrish, R.R.	1997	Paleozoic and Mesozoic rocks fo Stikinia exposed in northwestern British Columbia: Implications for correlations in the northern Cordillera	Geological Society of America Bulletin	109	1402	1420	1
1014	Cann, R.M. and Godwin, C.I.	1980	Geology and age of the Kemess porphyry copper-molybdenum deposit, North-central British Columbia	Canadian Mining and Metallurgical Bulletin	73	94	99	1
1015	Ross, G.M., Gehrels, G.E. and Patchett, P.J.	1997	Provenance of Triassic strata in the Cordilleran miogeocline, western Canada	Bulletin of Canadian Petroleum Geology	45	461	473	1
1016	Plint, H.E., Erdmer, P., Reynolds, P.H., and Grist, A.M.	1992	Eocene tectonics in the Omineca Belt, northern British Columbia, Canada: Field, 40Ar-39Ar, and fission-track data from the Horseranch Range	Geological Society of America Bulletin	104	106	116	1
1017	Souther, J.G., Armstrong, R.L., and Harakal, J.	1984	Chronology of the peralkaline, late Cenozoic Mount Edziza Volcanic Complex, northern British Columbia, Canada	Geological Society of America Bulletin	95	337	349	1
1018	Cooke, B.J. and Godwin, C.I.	1984	Geology, mineral equilibria, and isotopic studies of the McDame tungsten skarn prospect, north-central British Columbia	Economic Geology	79	826	847	1
1019	Pálfy, J., Mortensen, J.K., Smith, P.L., Friedman, R.M., McNicoll, V. and Villeneuve, M.	2000	New U-Pb zircon ages integrated with ammonite biochronology from the Jurassic of the Canadian Cordillera	Canadian Journal of Earth Sciences	37	549	567	1
1020	Eadie, E.T.	1976	K-Ar and Rb-Sr Geochronology of the Northern Hogem Batholith, B.C.	Unpublished B.Sc. thesis, University of British Columbia, Vancouver, B.C.			46	3
1021	Erdman, L.R.	1978	Petrology, geochronology and geochemistry of Jurassic volcanic and granitic rocks on the Cry Lake and Spatsizi Map Sheets, north-central B.C.	Unpublished B.Sc. thesis, University of British Columbia, Vancouver, B.C.			84	3
1022	Johannson, G.G. and McNicoll, V.J.	1997	New U-Pb data from the Laberge Group, northwest British Columbia: implications for Stikinian arc evolution and Lower Jurassic time scale calibrations	Radiogenenic Age and Isotopic Studies Report 10, Geological Survey of Canada, Current Research 1997-F		121	129	2
1023	Gabrielse, H., Wanless, R.K., Armstrong, R.L. and Erdman, L.R.	1980	Isotopic dating of Early Jurassic volcanism and plutonism in North-central British Columbia.	Current research, Part A, Geological Survey of Canada, Paper 80-1A		27	32	2
1024	Childe, F.C.	1996	U-Pb geochronology and Nd and Pb isotopic characteristics of the Au-Ag-rich Eskay Creek volcanogenic massive sulfide deposit, British Columbia	Economic Geology	91	1209	1224	1
1025	Green, D., Greig, C.J. and Friedman, R.M.	1995	Geologic setting, geochronology, and thermal modelling of the Portland Canal dyke swarm, Stewart area, northwestern British Columbia	Current Research, Part E, Geological Survey of Canada Paper 95-1E		47	57	2
1026	Gabrielse, H., Loveridge, W.D., Sullivan, R.W. and Stevens, R.D.	1982	U-Pb measurements on zircon indicate Middle Paleozoic plutonism in the Omineca crystalline belt, north-central British Columbia	Current Research, Part C, Geological Survey of Canada, Paper 82-1C		139	146	2
1027	Heah, T.S.T., Armstrong, R.L. and Woodsworth, G.J.	1986	The Gambier Group in the Sky Pilot area, southwestern Coast Mountains, British Columbia	Current Research, Part B, Geological Survey of Canada, Paper 86-1B		685	692	2
1028	Holbek, P.M.	1988	Geology and mineralization of the Stikine Assemblage, Mess Creek area, northwestern British Columbia	Unpublished M.Sc. thesis, University of British Columbia, Vancouver, B.C.			184	3
1029	Jacobson, B., Parrish, R.R. and Armstrong, R.L.	1980	Geochronology and petrology of the Tkope River Batholith in the Saint Elias Mountains, northwestern British Columbia	Current research, Part B, Geological Survey of Canada, Paper 80-1B		195	206	2
1030	Roots, C.F., Harms, T.A., Simard, R.L., Orchard, M.J. and Heaman, L.	2002	Constraints on the age of the Klinkit assemblage east of Teslin Lake, northern British Columbia	Geological Survey of Canada, Current Research 2002-A7			11	2
1031	Anderson, R.G., Loveridge, W.D. and Sullivan, R.W.	1982	U-Pb isotopic ages of zircon from the Jurassic plutonic suite, Hotailuh Batholith, north-central British Columbia	Current Research, Part C, Geological Survey of Canada, Paper 82-1C		133	137	2
1032	McMillan, W.J., Armstrong, R.L. and Harakal, J.	1982	Age of the Coldwater Stock and Nicola Batholith, near Merritt (92H)	British Columbia Ministry of Energy, Mines and Petroleum Resources, Geological Fieldwork 1981, Paper 1982-1		102	105	2
1033	Evenchick, C.A. and McNicoll, V.J.	1997	U-Pb age for the Jurassic McEwan Creek pluton, north-central British Columbia: regional setting and implications for the Toarcian stage boundary	Radiogenic age and isotopic studies: Report 7; Geological Survey of Canada, Paper 93-2		91	97	2
1034	Greig, C.J., McNicoll, V.J., Anderson, R.G., Daubeny, P.H., Harakal, J.E. and Runkle, D.	1995	New K-Ar and U-Pb ages for the Cambria Icefield area, northwestern British Columbia	Current Research Part A, Geological Survey of Canada, Paper 95-1A		97	103	2
1035	Anderson, R.G. and Bevier, M.L.	1992	New Late Triassic and Early Jurassic U-Pb zircon ages from the Hotailuh Batholith, Cry Lake map area, north-central British Columbia	Radiogenic age and isotopic studies: Report 6; Geological Survey of Canada, Paper 92-2		145	152	2
1036	Christopher, P.A., White, W.H. and Harakal, J.E.	1972	Age of molybdenum and tungsten mineralization in northern British Columbia	Canadian Journal of Earth Sciences	9	1727	1734	1
1037	Parrish, R.R.	1979	Geochronology and tectonics of the northern Wolverine Complex, British Columbia	Canadian Journal of Earth Sciences	16	1428	1438	1
1038	Currie, L.D.	1992	Metamorphic rocks in the Tagish Lake area, northern Coast Mountains, British Columbia: a possible link between Stikinia and parts of Yukon-Tanana Terrane	Current Research Part A, Geological Survey of Canada, Paper 92-1A		199	208	2
1039	Parrish, R.R. and Armstrong, R.L.	1987	The ca. 162 Ma Galena Bay Stock and its relationship to the Columbia River fault zone, Southeast British Columbia	Radiogenic age and Isotopic Studies; Report 1: Geological Survey of Canada, Paper 87-2		25	32	2
1040	Currie, L.D.	1992	U-Pb geochronology of Cretaceous and Tertiary plutonic rocks of the Tagish Lake area, northeastern Coast Mountains, British Columbia	Radiogenic age and isotopic studies: Report 6; Geological Survey of Canada, Paper 92-2		163	170	2
1041	Ricketts, B.D. and Parrish, R.R.	1992	Age and provenance of felsic clasts in Bowser Basin, northern British Columbia	Radiogenic age and isotopic studies: Report 6; Geological Survey of Canada, Paper 92-2		141	144	2
1042	Parrish, R.R. and Tipper, H.W.	1992	U-Pb zircon age of a clast from the Uslika Formation, north-central British Columbia, and implications for the age of the Uslika Formation	Radiogenic age and isotopic studies: Report 5; Geological Survey of Canada, Paper 91-2		163	166	2
1043	Ash, C.H.	2001	Relationship between ophiolites and gold-quartz veins in the North American Cordillera	British Columbia Ministry of Energy, Mines and Petroleum Resources, Bulletin	108		140	3
1044	Preto, V.A., Osatenko, M.J., McMillan, W.J. and Armstrong, R.L.	1979	Isotopic dates and strontium isotopic ratios for plutonic and volcanic rocks in the Quesnel Trough and Nicola Belt, South-central British Columbia	Canadian Journal of Earth Sciences	16	1658	1672	1
1045	Nelson, J.L. and Bradford, J.A.	1992	Geology of the Midway-Cassiar area, northern British Columbia (104O, 104P)	British Columbia Ministry of Energy, Mines and Petroleum Resources, Bulletin	83		94	3
1046	Ferri, F., Melville, D.M., and Orchard, M.J.	1994	Bedrock geology of the Germansen Landing - Manson Creek area, British Columbia (94N/9, 10, 15; 94C/2)	British Columbia Ministry of Energy, Mines and Petroleum Resources, Bulletin	91		147	3
1047	Ryan, B.D. and Blenkinsop, J.	1971	Geology and geochronology of the Hellroaring Creek stock, British Columbia	Canadian Journal of Earth Sciences	8	85	95	1
1048	Nixon, G.T., Hammack, J.L., Ash, C.H., Cabri, L.J., Case, G., Connelly, J.N., Heaman, L.M., Laflamme, J.H.G., Nuttall, C., Paterson, W.P.E. and Wong, R.H.	1997	Geology and platinum-group-element mineralization of Alaskan-type ultramafic-mafic complexes in British Columbia	British Columbia Ministry of Energy, Mines and Petroleum Resources, Bulletin	93		142	3
1049	Hyndman, R.D. and Hamilton, T.S.	1991	Cenozoic relative plate motions along the northeastern Pacific Margin and their association with Queen Charlotte area tectonics and volcanism	Evolution and Hydrocarbon Potential of the Queen Charlotte Basin, British Columbia, Geological Survey of Canada, Paper 90-10		107	126	2
1050	Smith, C.B., Colgan, E.A., Hawthorne, J.B. and Hutchinson, G.	1988	Emplacement age of the Cross Kimberlite, southeastern British Columbia, by the Rb-Sr phlogopite method.	Canadian Journal of Earth Sciences	25	790	792	1
1051	Mihalynuk, M.G.	1999	Geology and mineral resources of the Tagish Lake area (NTS 104M/8, 9, 10E, 15 and 104N/12W) Northwestern British Columbia	British Columbia Ministry of Energy, Mines and Petroleum Resources, Bulletin	105		217	3
1052	Pell, J.	1994	Carbonatites, nepheline syenites, kimberlites and related rocks in British Columbia	British Columbia Ministry of Energy, Mines and Petroleum Resources, Bulletin	88		136	3
1053	Thorstad, L.E. and Gabrielse, H.	1986	The Upper Triassic Kutcho Formation, Cassiar Mountains, north-central British Columbia	Geological Survey of Canada, Paper 86-16			53	3
1054	Ferri, F., Rees, C., Nelson, J.L., and Legun, A.	1999	Geology and mineral deposits of the northern Kechika Trough between Gataga River and the 60th Parallel	British Columbia Ministry of Energy, Mines and Petroleum Resources, Bulletin	107		122	3
1055	Brown, D.A., Gunning, M.H. and Greig, C.J.	1996	The Stikine Project: Geology of the western Telegraph Creek map area, northwestern British Columbia (NTS 104G/5, 6, 11W, 12 and 13)	British Columbia Ministry of Energy, Mines and Petroleum Resources, Bulletin	95		175	3
1056	Yanagi, T., Baadsgaard, H., Stelck, C.R. and McDougall, I.	1988	Radiometric dating of a tuff bed in the middle Albian Hulcross Formation at Hudson's Hope, British Columbia	Canadian Journal of Earth Sciences	25	1123	1127	1
1057	Brown, D.A., Greig, C.J., Bevier, M.L. and McClelland, W.C.	1992	U-Pb zircon ages for the Hazelton Group and Cone Mountain and Limpoke plutons, Telegraph Creek map area, northwestern British Columbia: age constraints on volcanism and deformation	Radiogenic age and isotopic studies: Report 6; Geological Survey of Canada, Paper 92-2		153	162	2
1058	Logan, J.M., Drobe, J.R. and McClelland, W.C.	2000	Geology of the Forrest Kerr - Mess Creek area, northwestern British Columbia (NTS 104B/10, 15 & 104G/2 & 7W)	British Columbia Ministry of Energy, Mines and Petroleum Resources, Bulletin	104		164	3
1059	Schroeter, T.G.	0	unpublished	n/a				4
1060	Woodsworth, G.	0	unpublished	n/a				4
1061	Souther, J.G.	0	unpublished	n/a				4
1062	Britten, R. (Esso)	0	unpublished	n/a				4
1063	Peto, P.	0	unpublished	n/a				4
1064	Read, P.B.	0	unpublished	n/a				4
1065	Gabrielse, H.	0	unpublished	n/a				4
1066	Eisbacher, G.	0	unpublished	n/a				4
1067	Leekie, D.	0	unpublished	n/a				4
1068	Maeder, U.K.	0	unpublished	n/a				4
1069	Rouse, G.	0	unpublished	n/a				4
1070	Gabrielse, H., Mortensen, J.K., Parrish, R.R., Harms, T.A., Nelson, J.L., and van der Heyden, P.	1993	Late Paleozoic plutons in the Sylvester Allochthon, northern British Columbia	Radiogenic age and isotopic studies, Report 7: Geological Survey of Canada, Paper 93-2		107	118	2
1071	Monger, J.W.H.	0	unpublished	n/a				4
1072	Alldrick, D.J.	1993	Geology and metallogeny of the Stewart mining camp, northwestern British Columbia	British Columbia Ministry of Energy, Mines and Petroleum Resources, Bulletin	85		105	3
1073	Dawson, K.	0	unpublished	n/a				4
1074	Hamilton, T.S.	0	unpublished	n/a				4
1075	Church, B.N., Dostal, J. and Gale, V.	1997	Age of a basalt dike, Sustut Copper Deposit (94D/10E)	British Columbia Ministry of Energy, Mines and Petroleum Resources, Geological Fieldwork 1996, Paper 1997-1		215	217	2
1076	Greig, C.J. and Gehrels, G.E.	1995	U-Pb zircon geochronology of Lower Jurassic and Paleozoic Stikinian strata and Tertiary intrusions, northwestern British Columbia	Canadian Journal of Earth Sciences	32	1155	1171	1
1077	Mihalynuk, M.G., Gabites, J.E., Orchard, M.J. and Toser, E.T.	1997	Age of a basalt dike, Sustut Copper Deposit (94D/10E)	British Columbia Ministry of Energy, Mines and Petroleum Resources, Geological Fieldwork 1996, Paper 1997-1		171	179	2
1078	Mihalynuk, M.G., Nelson, J.L., Roots, C.F., Friedman, R.F. and de Keijzer, M.	2000	Ancient Pacific Margin Part III: Regional geology and mineralization of the Big Salmon Complex (NTS 104N/9E, 16 & 104O/12, 13, 14W)	British Columbia Ministry of Energy, Mines and Petroleum Resources, Geological Fieldwork 1999, Paper 2000-1		27	45	2
1079	Mihalynuk, M.G., McMillan, W.J., Mortensen, J.K., Childe, F.C. and Orchard, M.J.	1996	Age of host strata versus mineralization at Ericksen-Ashby: a skarn deposit	British Columbia Ministry of Energy, Mines and Petroleum Resources, Geological Fieldwork 1995, Paper 1996-1		175	179	2
1080	Sherlock, R.L., Childe, F., Barrett, T.J., Mortensen, J.K., Lewis, P.D., Chandler, T., McGuigan, P., Dawson, G.L. and Allen, R.	1994	Geological investigations of the Tulsequah Chief massive sulphide deposit, northwestern British Columbia (104K/12)	British Columbia Ministry of Energy, Mines and Petroleum Resources, Geological Fieldwork 1993, Paper 1994-1		373	379	2
1081	Childe, F. and Mihalynuk, M.G.	1995	U-Pb geochronology of the Mount Stapler quartz monzonite: evidence for Early Jurassic magmatism in the Tulsequah Glacier area, northwest British Columbia (104K/13)	British Columbia Ministry of Energy, Mines and Petroleum Resources, Geological Fieldwork 1994, Paper 1995-1		521	527	2
1082	Nelson, J.L., Harms, T. and Mortensen, J.K.	1998	Extensions and affiliates of the Yukon-Tanana Terrane in northern British Columbia	British Columbia Ministry of Energy, Mines and Petroleum Resources, Geological Fieldwork 1997, Paper 1998-1		7.1	7.12	2
1083	Friedman, R.M. and Mortensen, J.K.	2002	U-Pb zircon and titanite dating in support of British Columbia Geological Survey regional mapping studies	British Columbia Ministry of Energy, Mines and Petroleum Resources, Geological Fieldwork 2001, Paper 2002-1		135	149	2
1084	Smith, M.T. and Mihalynuk, M.G.	1992	Geologic setting of the Maple Leaf property, northwestern B.C.	British Columbia Ministry of Energy, Mines and Petroleum Resources, Exploration in British Columbia 1991		133	133	2
1085	Macdonald, A.J.	1993	Lithostratigraphy and geochronometry, Brucejack Lake, northwestern British Columbia (104B/8E)	British Columbia Ministry of Energy, Mines and Petroleum Resources, Geological Fieldwork 1992, Paper 1993-1		315	323	2
1086	Oliver, J. and Gabites, J.	1993	Geochronology of rocks and polyphase deformation, Bearskin (Muddy) and Tatsamenie Lakes District, northwestern British Columbia (104K/8, 1)	British Columbia Ministry of Energy, Mines and Petroleum Resources, Geological Fieldwork 1992, Paper 1993-1		177	184	2
1087	Macdonald, A.J., van der Heyden, P., Lefebure, D.V. and Alldrick, D.J.	1992	Geochronometry of the Iskut River area - an update (104A and B)	British Columbia Ministry of Energy, Mines and Petroleum Resources, Geological Fieldwork 1991, Paper 1992-1		495	501	2
1088	Friedman, R.M. and Ash, C.H.	1997	U-Pb age of intrusions related to porphyry Cu-Au mineralization in the Tatogga Lake area, northwestern British Columbia (1o4H/12NW, 104G/9NE)	British Columbia Ministry of Energy, Mines and Petroleum Resources, Geological Fieldwork 1996, Paper 1997-1		495	501	2
1089	Gleeson, T.P., Friedman, R.M. and Wahl, K.	2000	Stratigraphy, structure, geochronology and provenance of the Logjam area, northwestern British Columbia (NTS 104O/14W)	British Columbia Ministry of Energy, Mines and Petroleum Resources, Geological Fieldwork 1999, Paper 2000-1		297	306	2
1090	Bradford, J.A. and Godwin, C.I.	1987	Midway silver-lead-zinc Manto deposit, northern British Columbia (104O/16)	British Columbia Ministry of Energy, Mines and Petroleum Resources, Geological Fieldwork 1987, Paper 1988-1		353	360	2
1091	Mihalynuk, M.G. and Heaman, L.M.	2002	Age of mineralized porphyry at the Logtung deposit W-Mo-Bi-Be (Beryl, Aquamarine), northwest BC	British Columbia Ministry of Energy, Mines and Petroleum Resources, Geological Fieldwork 2001, Paper 2002-1		35	39	2
1092	Panteleyev, A.	1981	1980 - Cassiar map-area (104P/4, 5)	British Columbia Ministry of Energy, Mines and Petroleum Resources, Geology in B.C. 1977-1981		189	190	2
1093	Armstrong, R.L. and Werner, L.	0	unpublished	n/a				4
1094	Mihalynuk, M.G., Erdmer, P., Ghent, E.D., Arcihbald, D.A., Friedman, R.M., Cordey, F., Johannson, G.G. and Beanish, J.	1999	Age constraints for emplacement of the northern Cache Creek Terrane and implications of blueschist metamorphism	British Columbia Ministry of Energy, Mines and Petroleum Resources, Geological Fieldwork 1998, Paper 1999-1		127	141	2
1095	Mihalynuk, M.G., Nelson, J. and Friedman, R.M.	1998	Regional geology and mineralization of the Big Salmon Complex (104N NE and 104O NW)	British Columbia Ministry of Energy, Mines and Petroleum Resources, Geological Fieldwork 1997, Paper 1998-1		6.1	6.2	2
1096	Clark, J.R. and Williams-Jones, A.E.	1990	40Ar/39Ar ages of epithermal alteration and volcanic rocks in the Toodoggone Au-g district, north-central British Columbia (94E)	British Columbia Ministry of Energy, Mines and Petroluem Resources, Geological Fieldwork 1990, Paper 1991-1		207	216	2
1097	Donelick, R.A. and Dickie, J.R.	1990	Low-temperature thermal history of the Coast Plutonic Complex and Intermontane Belt, northwest British Columbia (104M, N)	British Columbia Ministry of Energy, Mines and Petroluem Resources, Geological Fieldwork 1990, Paper 1991-1		139	144	2
1098	Lewis, P.D., Mortensen, J.K., Childe, F., Friedman, R.M., Gabites, J., Ghosh, D. and Bevier, M.L.	2001	Geochronology data set	Metallogenesis of the Iskut River area, northwestern B.C., [MDRU publication]		89	96	2
1099	Childe, F.C.	1997	Timing and tectonic setting of volcanogenic massive sulphide deposits in British Columbia: constraints from U-Pb geochronology, radiogenic isotopes, and geochemistry	Unpublished Ph.D. thesis, University of British Columbia, Vancouver, British Columbia			298	3
1100	Bridge, D.J.	1993	The deformed Early Jurassic Kerr copper-gold porphyry deposit, Sulphurets Gold Camp, northwestern British Columbia	Unpublished M.Sc. thesis, University of British Columbia, Vancouver, British Columbia			303	3
1101	Evenchick, C.A., Parrish, R.R. and Gabrielse, H.	1984	Precambrian gneiss and late Proterozoic sedimentation in north-central British Columbia	Geology	12	233	237	1
1102	Brown, D.A.	1987	Geological setting of the volcanic-hosted Silbak Premier Mine, northwestern British Columbia (104A/4, B/1)	Unpublished M.Sc. thesis, University of British Columbia, Vancouver, British Columbia			216	3
1103	Devine, F.A.M.	2002	U-Pb geochronology, geochemistry, and tectonic implications of oceanic rocks in the northern Cache Creek terrane, Nakina area, northwestern British Columbia	Unpublished B.Sc. thesis, University of British Columbia, Vancouver, British Columbia			49	3
1104	Devlin, B.D.	1987	Geology and genesis of the Dolly Varden Silver Camp, Alice Arm area, northwestern British Columbia	Unpublished M.Sc. thesis, University of British Columbia, Vancouver, British Columbia			131	3
1105	Moore, J.M., Gabites, J.E. and Friedman, R.M.	2000	Nicola Horst: toward a geochronology and cooling history	Slave-Northern Cordillera Lithospheric Evolution (SNORCLE) Transect and Cordilleran Tectonics Workshop Meeting (March 5-7), University of Calgary, Lithoprobe Report No.72		177	185	2
1106	Green, D.	2001	Geology of volcanogenic massive sulphide prospects of the Palmer Property, Haines area, southeastern Alaska	Unpublished M.Sc. thesis, Carleton University, Ottawa, Ontario			253	3
1107	Kaip, A.W.	1997	Geology, alteration and mineralization on the Hank Property, northwestern British Columbia: a near-surface, low-sulfidation epithermal system	Unpublished M.Sc. thesis, University of British Columbia, Vancouver, British Columbia			199	3
1108	Patterson, K.M.	1994	The stratigraphy and structure of Troy Ridge, southeastern Iskut map area, northwestern British Columbia	Unpublished B.Sc. thesis, University of British Columbia, Vancouver, British Columbia			116	3
1109	Baadsgaard, H., Folinsbee, R.E. and Lipson, J.I.	1961	Potassium-argon dates of biotites from Cordilleran granites	Geological Society of America Bulletin	72	689	702	1
1110	McColl, K.M.	1987	Geology of Britannia Ridge, east section, southwest British Columbia	Unpublished M.Sc. thesis, University of British Columbia, Vancouver, British Columbia			207	3
1111	Kapp, P.A. and Gehrels, G.E.	1998	Detrital zircon constraints on the tectonic evolution of the Gravina belt, southeastern Alaska	Canadian Journal of Earth Sciences	35	253	268	1
1115	Gehrels, G.E. and Ross, G.M.	1998	Detrital zircon geochronology of Neoproterozoic to Permian miogeoclinal strata in British Columbia and Alberta	Canadian Journal of Earth Sciences	35	1380	1401	1
1116	Garnett, J.A.	1978	Geology and mineral occurrences of the Southern Hogem Batholith	British Columbia Ministry of Mines and Petroleum Resources, Bulletin	70		75	3
1117	MacIntyre, D.G.	1985	Geology and mineral deposits of the Tahtsa Lake District, west-central British Columbia	British Columbia Ministry of Mines and Petroleum Resources, Bulletin	75		82	3
1118	Carter, N.C.	1981	Porphyry copper and molybdenum deposits, west-central British Columbia	British Columbia Ministry of Energy, Mines and Petroleum Resources, Bulletin	64		150	3
1119	Panteleyev, A., Bailey, D.G., Bloodgood, M.A. and Hancock, K.D.	1996	Geology and mineral deposits of the Quesnel River - Horsefly map area, central Quesnel Trough, British Columbia	British Columbia Ministry of Energy, Mines and Petroleum Resources, Bulletin	97		156	3
1120	Diakow, L.J. and Koyanogi, V.	1988	Stratigraphy and mineral occurrences of Chikamin Mountain and Whitesail Reach map areas (93E/06, 10)	British Columbia Ministry of Energy, Mines and Petroleum Resources, Geological Fieldwork 1987, Paper 1988-1		155	168	2
1121	Church, B.N.	1986	The Bob Creek gold-silver prospect (93L)	British Columbia Ministry of Energy, Mines and Petroleum Resources, Geological Fieldwork 1985, Paper 1986-1		121	123	2
1122	Godwin, C.I. and Cann, R.	1985	The Mac Porphyry molybdenite property, central British Columbia (93K/13E)	British Columbia Ministry of Energy, Mines and Petroleum Resources, Geological Fieldwork 1984, Paper 1985-1		443	449	2
1123	Andrew, A., Godwin, C.I. and Sinclair, A.J.	1983	Age and genesis of Cariboo gold mineralization determined by isotope methods (93H)	British Columbia Ministry of Energy, Mines and Petroleum Resources, Geological Fieldwork 1982, Paper 1983-1		205		2
1124	White, G.P.E.	1982	Notes on carbonatites in central British Columbia (83D/6E)	British Columbia Ministry of Energy, Mines and Petroleum Resources, Geological Fieldwork 1981, Paper 1982-1		68	69	2
1125	Mesard, P.M., Godwin, C.I. and Carter, N.C.	1979	Geology of the Poplar Porphyry copper-molybdenum deposit (93L/3E; 93E/15W)	British Columbia Ministry of Energy, Mines and Petroleum Resources, Geological Fieldwork 1978, Paper 1979-1		139	143	2
1126	Hickson, C.J., Moore, J.G., Calk, L. and Metcalfe, P.	1995	Intraglacial volcanism in the Wells Gray - Clearwater volcanic field, east-central British Columbia, Canada	Canadian Journal of Earth Sciences	32	838	851	1
1127	Rouse, G.E. and Mathews, W.H.	1988	Palynology and geochronology of Eocene beds from Cheslatta Falls and Nazko areas, central British Columbia	Canadian Journal of Earth Sciences	25	1268	1276	1
1128	Evans, C.R., Steiner, J. and Weiner, J.L.	1964	Age-dating studies on Precambrian rocks at Jasper, Alberta	Canadian Mining and Metallurgical Bulletin	57	33	36	1
1129	Diakow, L.J.	1985	Potassim-argon age determination from biotite and hornblende in Toodoggone volcanic rocks	British Columbia Ministry of Energy, Mines and Petroleum Resources, Geological Fieldwork 1984, Paper 1985-1		298	300	2
1130	Hills, L.V. and Baadsgaard, H.	1967	Potassium-argon dating of some Lower Tertiary strata in British Columbia	Bulletin of Canadian Petroleum Geology	15	138	149	1
1131	Parrish, R.R.	1983	Cenozoic thermal evolution and tectonics of the Coast Mountains of British Columbia 1. Fission track dating, apparent uplift rates, and patterns of uplift	Tectonics	2	601	631	1
1132	Rouse, G.E. and Mathews, W.H.	1979	Tertiary geology and palynology of the Quesnel area, British Columbia	Bulletin of Canadian Petroleum Geology	27	418	445	1
1133	Mathews, W.H.	1964	Potassium-argon age determinations of Cenozoic volcanic rocks from British Columbia	Geological Society of America Bulletin	75	465	468	1
1134	Souther, J.G.	1986	The western Anahim Belt: root zone of a peralkaline magma system	Canadian Journal of Earth Sciences	23	895	908	1
1135	White, W.H., Sinclair, A.J., Harakal, J.E. and Dawson, K.M.	1970	Potassium-argon ages of Topley Intrusions near Endako, British Columbia	Canadian Journal of Earth Sciences	7	1172	1178	1
1136	Woodsworth, G.J., Loveridge, W.D., Parrish, R.R. and Sullivan, R.W.	1983	Uranium-lead dates from the Central Gneiss Complex and Ecstall Pluton, Prince Rupert map area, British Columbia	Canadian Journal of Earth Sciences	20	1475	1483	1
1137	Cyr, J.B., Pease, R.B., and Schroeter, T.G.	1984	Geology and mineralization at Equity Silver Mine	Economic Geology	79	947	1483	1
1138	Hickson, C.J. and Souther, J.G.	1984	Late Cenozoic volcanic rocks of the Clearwater - Wells Gray area, British Columbia	Canadian Journal of Earth Sciences	21	267	177	1
1139	Champigny, N. and Sinclair, A.J.	1980	The Cinola Gold Deposit, Queen Charlotte Islands, British Columbia	in Geology of Canadian Gold Deposits, Canadian Institute of Mining Special Volume 24		243	254	1
1140	Paterson, I.A. and Harakal, J.E.	1974	Potassium-argon dating of blueschists from Pinchi Lake, central British Columbia	Canadian Journal of Earth Sciences	11	1007	1011	1
1141	Drummond, A.D., Sutherland Brown, A., Young, R.J. and Tennant, S.J.	1976	Gibraltar - regional metamorphism, mineralization, hydrothermal alteration and structural development	Porphyry deposits of the Canadian Cordillera, Canadian Institute of Mining Special Volume 15		195	205	1
1142	White, W.H., Harakal, J.E. and Carter, N.C.	1968	Potassium-argon ages of some ore deposits in British Columbia	Canadian Mining and Metallurgical Bulletin	61	1326	1334	1
1143	Montgomery, J.R.	1985	Structural relations of the southern Quesnel Lake Gneiss, Isosceles Mountain area, southwest Cariboo Mountains, British Columbia.	Unpublished M.Sc. thesis, University of British Columbia, Vancouver, BC			96	3
1144	Mesard, P.M.	1979	The alteration and mineralization of the Poplar copper-molybdenum porphyry deposit west-central British Columbia	Unpublished M.Sc. thesis, University of British Columbia, Vancouver, BC			182	3
1145	Young, I.F.	1981	Structure of the western margin of the Queen Charlotte Basin, British Columbia	Unpublished M.Sc. thesis, University of British Columbia, Vancouver, B.C.			380	3
1146	Souther, J.G., Clague, J.J. and Mathewes, R.W.	1987	Nazko cone: a Quaternary volcano in the eastern Anahim Belt	Canadian Journal of Earth Sciences	24	2477	2485	1
1147	Mathews, W.H.	1989	Neogene Chilcotin basalts in south-central British Columbia: geology, ages, and geomorphic history	Canadian Journal of Earth Sciences	26	969	982	1
1148	Andrew, K.P.E.	1988	Geology and genesis of the Wolf precious metal epithermal prospect and the Capoose base and precious metal porphyry-style prospect, Capoose Lake area, central British Columbia	Unpublished M.Sc. thesis, University of British Columbia, Vancouver, British Columbia			334	3
1149	Panteleyev, A.	1976	Galore Creek map-area (104G/3W, 4E)	British Columbia Ministry of Energy, Mines and Petroluem Resources, Geological Fieldwork 1975, Paper 1976-1		79	81	2
1150	Panteleyev, A.	1975	Galore Creek map-area (104G/3W, 4E)	British Columbia Ministry of Energy, Mines and Petroluem Resources, Geological Fieldwork 1974, Paper 1975-1		59	61	2
1151	Schroeter, T.G., Diakow, L.J. and Panteleyev, A.	1986	Toodoggone river area (94E)	British Columbia Ministry of Energy, Mines and Petroluem Resources, Geological Fieldwork 1985, Paper 1986-1		167	174	2
1152	Panteleyev, A.	1983	Geology between Toodoggone and Sturdee Rivers (94E)	British Columbia Ministry of Energy, Mines and Petroluem Resources, Geological Fieldwork 1982, Paper 1983-1		143	147	2
1153	Clark, J.R. and Williams-Jones, A.E.	1990	New K-Ar isotopic ages of epithermal alteration from the Toodoggone River area, British Columbia (94E)	British Columbia Ministry of Energy, Mines and Petroluem Resources, Geological Fieldwork 1989, Paper 1990-1		409	412	2
1154	Wong, R.H. and Godwin, C.I.	1980	K/Ar age determinations Wrede Creek zoned ultramafic complex (94D/9E)	British Columbia Ministry of Energy, Mines and Petroluem Resources, Geological Fieldwork 1979, Paper 1980-1		157	158	2
1155	Schroeter, T.G.	1987	Golden Bear project (104K/1)	British Columbia Ministry of Energy, Mines and Petroluem Resources, Geological Fieldwork 1986, Paper 1987-1		103	109	2
1156	Panteleyev, A.	1976	Northwest British Columbia, Property examinations and continuing studies	British Columbia Ministry of Energy, Mines and Petroluem Resources, Geological Fieldwork 1975, Paper 1976-1		77	78	2
1157	Panteleyev, A. and Pearson, D.E.	1977	Kutcho Creek map-area (104I/1W)	British Columbia Ministry of Energy, Mines and Petroluem Resources, Geological Fieldwork 1976, Paper 1977-1		128	135	2
1158	BC Hydro	0	unpublished	n/a				4
1159	Church, B.N.	1986	Geological setting and mineralization in the Mount Attwood-Phoenix are of the Greenwood mining camp	British Columbia Ministry of Energy, Mines and Petroleum Resources, Paper 1986-2			65	3
1160	Grove, E.W.	1986	Geology and mineral deposits of the Unuk River-Salmon River-Anyox Area	British Columbia Ministry of Energy, Mines and Petroluem Resources, Bulletin	63		152	3
1161	Sketchley, D.A., Sinclair, A.J. and Godwin, C.I.	1986	Early Cretaceous gold-silver mineralization in the Sylvester allochthon, near Cassiar, north central British Columbia	Canadian Journal of Earth Sciences	23	1455	1458	1
1162	Logan, J.M. and Koyanagi, V.M.	1994	Geology and mineral deposits of the Galore Creek area, northwestern B.C. (105G/3, 4)	British Columbia Ministry of Energy, Mines and Petroleum Resources, Bulletin	92		96	3
1163	Bultman, R.B.	1979	Geology and tectonic history of the Whitehorse Trough west of Atlin, British Columbia	Unpublished Ph.D. thesis, Yale University			284	3
1164	Cooper, M.F.J.	1978	Geology of the Rose property porphyry copper occurrence, northwestern British Columbia	Unpublished M.Sc. thesis, Queen's University, Kingston, Ontario			220	3
1165	Morgan, J.T.	1978	Geology of the Ten Mile Creek syenite-pyroxenite pluton, Telegraph Creek, B.C.	Unpublished B.Sc. thesis, University of British Columbia, Vancouver, B.C.			42	3
1166	Panteleyev, A.	1964	A Late Tertiary volcanic sequence in the Sheslay River vicinity, Stikine area	Unpublished B.Sc. thesis, University of British Columbia, Vancouver, B.C.			32	3
1167	Schink, E.A.	1977	Geology of the Red-Chris porphyry copper deposit, northwestern British Columbia	Unpublished M.Sc. thesis, Queen's University, Kingston, Ontario			221	3
1168	Smith, J.G.	1977	Geology of the Ketchikan D-1 and Bradfield Canal A-1 Quadrangles, southeastern Alaska	United States Geological Survey, Bulletin	1425		49	3
1169	Hudson, T., Plafker, G. and Lanphere, M.A.	1977	Intrusive rocks of the Yakutat-St. Elias area, South-central Alaska	Journal of Research U.S. Geological Survey	5	155	172	1
1170	Christopher, P.A. and Pinsent	1982	Geology of the Ruby Creek-Boulder Creek Area (104N/11W) (Adanac Molybdenum Deposit	British Columbia Ministry of Mines, Energy and Petroleum Resources, Preliminary Map 52				3
1171	Getsinger, J.S.	1985	Geology of the Three Ladies Mountain/ Mount Stevenson area, Quesnel Highland, British Columbia	Unpublished Ph.D. thesis, University of British Columbia, Vancouver, British Columbia			239	3
1172	Thorkelson, D.J.	1986	Volcanic stratigraphy and petrology of the Mid-Cretaceous Spences Bridge Group near Kingsvale, southwestern British Columbia	Unpublished M.Sc. thesis, University of British Columbia, Vancouver, B.C.			119	3
1173	van der Heyden, P.	1982	Tectonic and stratigraphic relations between the Coast Plutonic Complex and Intermontane Belt, west central Whitesail Map Area, British Columbia	Unpublished M.Sc. thesis, University of British Columbia, Vancouver, B.C.			172	3
1174	Friedman, R.M.	1988	Geology and geochronometry of the Eocene Tatla Lake metamorphic core complex, western edge of the Intermontane Belt, British Columbia	Unpublished Ph.D. thesis, University of British Columbia, Vancouver, B.C.			348	3
1175	Friedman, R.M. and Armstrong, R.L.	1988	Tatla Lake Metamorphic Complex: an Eocene metamorphic core complex on the southwestern edge of the Intermontane Belt of British Columbia	Tectonics	7	1141	1166	1
1176	Godwin, C.I.	0	unpublished	n/a				4
1177	Gerasimoff, M.D.	1988	The Hobson Lake Pluton, Cariboo Mountains, British Columbia, and its significance to Mesozoic and early Cenozoic Cordilleran tectonics	Unpublished M.Sc. thesis, Queen's University, Kingston, Ontario			196	3
1178	van der Heyden, P.	1989	U-Pb and K-Ar Geochronometry of the Coast Plutonic Complex, 53 N to 54 N, British Columbia, and Implications for the Insular-Intermontane Superterrane Boundary	Unpublished Ph.D. thesis, University of British Columbia, Vancouver, B.C.			515	3
1179	Hickson, C.J.	1986	Quaternary volcanism in the Wells Gray - Clearwater area, east central British Columbia	Unpublished Ph.D. thesis, University of British Columbia, Vancouver, B.C.			357	3
1180	Armstrong, R.L. and Runkle, D.	1979	Rb-Sr geochronometry of the Ecstall, Kitkiata, and Quottoon plutons and their country rocks, Prince Rupert region, Coast Plutonic Complex, British Columbia	Canadian Journal of Earth Sciences	16	387	399	1
1181	Stock, G.C.	1974	A petrological discussion of the igneous contacts in the Mount Nation Triple Point area, north central British Columbia	Unpublished B.Sc. thesis, University of British Columbia, Vancouver, B.C.			55	3
1182	Church, B.N., Barakso, J. and Ball, D.	1981	Computer processing of geochemical data showing the primary dispersion of elements near the Equity Mine (Sam Goosly) (93L/1W)	British Columbia Ministry of Energy, Mines and Petroleum Resources, Geological Fieldwork 1980, Paper 1981-1		25	31	2
1183	Church, B.N. and Barakso, J.J.	1990	Geology, lithogeochemistry and mineralization in the Buck Creek Area, British Columbia	British Columbia Ministry of Energy, Mines and Petroleum Resources, Paper 1990-2			95	3
1184	Van Den Driessche, J. and Maluski, H.	1986	Mise en évidence d'un cisaillement ductile dextre d'âge crétacé moyen dans la région de Tête Jaune Cache (nort-est du complexe métamorphique Shuswap, Colombie-Britannique)	Canadian Journal of Earth Sciences	16	387	399	1
1185	Radloff, J.K.	1989	Origin and obduction of the ophiolitic Redfern Complex on the Omineca-Intermontane belts boundary, western Cariboo Mountains, British Columbia.	Unpublished M.Sc. thesis, University of British Columbia, Vancouver, BC			147	3
1186	Bailey, D.G. and Archibald, D.A.	1990	Age of the Bootjack Stock, Quesnel Terrane, south-central British Columbia (93A)	British Columbia Ministry of Energy, Mines and Petroleum Resources, Geological Fieldwork 1989, Paper 1990-1		79	82	2
1187	Schink, E.A.	1974	Geology of the Shiko Lake Stock, near Quesnel Lake, British Columbia	Unpublished B.Sc. thesis, University of British Columbia, Vancouver, British Columbia			64	3
1188	Hill, M.L.	1985	Geology of the Redcap Mountain area, Coast Plutonic Complex, British Columbia.	Unpublished Ph.D. thesis, Princeton University, Princeton, New Jersey			216	3
1189	Mathews, W.H.	0	unpublished	n/a				4
1190	Panteleyev, A.	0	unpublished	n/a				4
1191	Pigage, L.C.	0	unpublished	n/a				4
1192	Bevier, M.L.	1981	The Rainbow Range, British Columbia: a Miocene peralkaline shield volcano	Journal of Volcanology and Geothermal Research	11	225	251	1
1193	Yorath, C.J. and Chase, R.L.	1981	Tectonic history of the Queen Charlotte Islands and adjacent areas - a model	Canadian Journal of Earth Sciences	18	1717	1739	1
1194	Chamberlain, V.E., Lambert, R.S.J., Baadsgaard, H. and Gale, N.H.	1979	Geochronology of the Malton Gneiss Complex of British Columbia	Current research, Part B, Geological Survey of Canada, Paper 79-1B		45	60	2
1195	Chamberlain, V.E., Lambert, R.J. and Holland, J.G.	1985	Geochemistry and geochronology of the gneisses east of the Southern Rocky Mountain Trench, near Valemount, British Columbia	Canadian Journal of Earth Sciences	22	980	991	1
1196	Ghent, E.D.	0	unpublished	n/a				4
1197	Wetherell, D. and Holt, E.	0	unpublished	n/a				4
1198	Armstrong, R.L. and Parkinson, D.	0	unpublished	n/a				4
1199	Harrison, T.M., Armstrong, R.L., Naeser, C.W. and Harakal, J.E.	1979	Geochronology and thermal history of the Coast Plutonic Complex, near Prince Rupert, British Columbia	Canadian Journal of Earth Sciences	16	400	410	1
1200	Roed, M.A. and Harakal, J.E.	0	unpublished	n/a				4
1201	Harakal, J.E. and Runkle, D.	0	unpublished	n/a				4
1202	Alldrick, D.J.	0	unpublished	n/a				4
1203	Klein, G.	0	unpublished	n/a				4
1204	reuse
1205	Blenkinsop, J.	1972	Computer-assisted mass spectrometry and its application to rubidium-strontium geochronology	Unpublished Ph.D. thesis, University of British Columbia, Vancouver, B.C.			109	3
1206	Nixon, G.T. and Archibald, D.A.	2002	Age of platinum-group-element mineralization in the Sappho Alkaline Complex, south-central British Columbia	British Columbia Ministry of Energy, Mines and Petroleum Resources, Geological Fieldwork 2001, Paper 2002-1		171	176	2
1207	White, G.P.E.	0	unpublished	n/a				4
1208	Parrish, R.R. and Armstrong, R.L.	0	unpublished	n/a				4
1209	Fletcher, C.J.N. and Rees, C.	0	unpublished	n/a				4
1210	McDonald, J.	0	unpublished	n/a				4
1211	Pigage, L.C.	1977	Rb-Sr dates for granodiorite intrusions on the northeast margin of the Shuswap metamorphic complex, Cariboo Mountains, British Columbia	Canadian Journal of Earth Sciences	14	1690	1695	1
1212	Hickson, C.J.	0	unpublished	n/a				4
1213	Rees, C.J.	1987	The Intermontane-Omineca Belt boundary in the Quesnel Lake area, east-central British Columbia; tectonic implications based on geology, structure and paleomagnetism	Unpublished Ph.D. thesis, Carleton University, Ottawa, Ontario			421	3
1214	Anderson, R.G.	1983	Geology of the Hotailuh Batholith and surrounding volcanic and sedimentary rocks, north-central British Columbia	Unpublished Ph.D. thesis, Carleton University, Ottawa, Ontario			669	3
1215	Bevier, M.L.	1983	Regional stratigraphy and age of Chilcotin Group basalts, south-central British Columbia	Canadian Journal of Earth Sciences	20	515	524	1
1216	Meade, H.D.	1977	Petrology and metal occurrences of the Takla Group and Hogem and Germansen batholiths, North central British Columbia	Unpublished Ph.D. thesis, University of Western Ontario, London, Ontario			355	3
1217	Church, B.N.	0	unpublished	n/a				4
1218	Cyr, J.B.	0	unpublished	n/a				4
1219	Friedman, R.M., Diakow, L.J., Lane, R.A. and Mortensen, J.K.	2001	New U-Pb age constraints on latest Cretaceous magmatism and associated mineralization in the Fawnie Range, Nechako Plateau, central British Columbia	Canadian Journal of Earth Sciences	38	619	637	1
1220	Selby, D. and Creaser, R.A.	2001	Re-Os geochronology and systematics in molybdenite from the Endako Porphyry Molybdenum Prospect, British Columbia, Canada	Economic Geology	96	197	204	1
1221	Gehrels, G.E. and Boghossian, N.D.	2000	Reconnaissance geology and U-Pb geochronology of the west flank of the Coast Mountains between Bella Coola and Prince Rupert, coastal British Columbia	Tectonics of the Coast Mountains, southeastern Alaska and British Columbia, Geological Society of America Special Paper	343	61	75	2
1222	Dostal, J., Robichaud, D.A., Church, B.N. and Reynolds, P.H.	1998	Eocene Challis-Kamloops volcanism in central British Columbia: an example from the Buck Creek basin	Canadian Journal of Earth Sciences	35	951	963	1
1223	Dostal, J., Church, B.N., Reynolds, P.H. and Hopkinson, L.	2001	Eocene Challis-Kamloops volcanism in the Buck Creek basin, central British Columbia (Canada): transition from arc to extensional volcanism	Journal of Volcanology and Geothermal Research	107	149	170	1
1224	Grainger, N.C., Villeneuve, M.E., Heaman, L.M. and Anderson, R.G.	2001	New U-Pb and Ar/Ar isotopic age constraints on the timing of Eocene magmatism, Fort Fraser and Nechako River map areas, central British Columbia	Canadian Journal of Earth Sciences	38	679	696	1
1225	Deyell, C.L., Thompson, J.F.H., Friedman, R.M. and Groat, L.A.	2000	Age and origin of advanced argillic alteration zones and related exotic limonite deposits in the Limonite Creek area, central British Columbia	Canadian Journal of Earth Sciences	37	1093	1107	1
1226	Murphy, D.C., Walker, R.T. and Parrish, R.R.	1991	Age and geological setting of Gold Creek gneiss, crystalline basement of the Windermere Supergroup, Cariboo Mountains, British Columbia	Canadian Journal of Earth Sciences	28	1217	1231	1
1227	McDonough, M.R. and Parrish, R.R.	1991	Proterozoic gneisses of the Malton Complex, near Valemount, British Columbia: U-Pb ages and Nd isotopic signatures	Canadian Journal of Earth Sciences	28	1202	1216	1
1228	Smith, A.D.	1993	Geochemistry and tectonic setting of volcanics from the Anyox mining camp, British Columbia	Canadian Journal of Earth Sciences	30	48	59	1
1229	MacIntyre, D.G. and Villeneuve, M.E.	2001	Geochronology of mid-Cretaceous to Eocene magmatism, Babine porphyry copper district, central British Columbia	Canadian Journal of Earth Sciences	38	639	655	1
1230	Villeneuve, M.E. and MacIntyre, D.G.	1997	Laser 40Ar/39Ar ages of the Babine porphyries and Newman Volcanics, Fulton Lake map area, west-central British Columbia	Radiogenic age and isotopic studies, Report 10; Geological Survey of Canada, Paper 1997-F	38	131	139	2
1231	MacIntyre, D.G., Villeneuve, M.E. and Schiarizza, P.	2001	Timing and tectonic setting of Stikine Terrane magmatism, Babine-Takla lakes area, central British Columbia	Canadian Journal of Earth Sciences	38	579	601	1
1232	Gareau, S.A.	1991	Geology of the Scotia-Quaal metamorphic belt, Coast Plutonic Complex, British Columbia	Unpublished Ph.D. thesis, Carleton University, Ottawa, Ontario			390	3
1233	Ghent, E.D., Erdmer, P., Archibald, D.A. and Stout, M.Z.	1996	Pressure-temperature and tectonic evolution of Triassic lawsonite-aragonite blueschists from Pinchi Lake, British Columbia	Canadian Journal of Earth Sciences	33	800	810	1
1234	Crawford, M.L., Klepeis, K.A., Gehrels, G. and Isachsen, C.	1999	Batholith emplacement at mid-crustal levels and its exhumation within an obliquely convergent margin	Tectonophysics	312	57	78	1
1235	van der Heyden, P.	1991	Preliminary U-Pb dates and field observations from the eastern Coast Belt near 52°N, British Columbia	Current Research Part A, Geological Survey of Canada, Paper 91-1A		79	84	2
1236	Friedman, R.M., Gareau, S.A. and Woodsworth, G.J.	2001	U-Pb dates from the Scotia-Quaal metamorphic belt, Coast Plutonic Complex, central-western British Columbia	Current Research, Geological Survey of Canada, Paper 2001-F9		1	15	2
[truncated: 375 more rows]

## Sheet: Biostratigraphy
	Reference	Formation	Fossil	Region	Oldest age	Youngest age	Low age	High age	Middle	Range
[truncated: 78 more rows]
