# Supplementary material for: The architecture of oceanic plateaus revealed by the volcanic stratigraphy of the accreted Wrangellia oceanic plateau
Source: Oxford University Press journal article supplement (doi:10.1130/ges00212.1), 2010-02-01
Supplement: supplement_1715615_Supp_Data7.doc [file supplement_1715615_Supp_Data7.doc]

**SUPPLEMENTARY DATA FILE 7.**

**STRATIGRAPHY OF WRANGELLIA**

**Wrangellia in southern Alaska**

The accretion and northward migration of parts of Wrangellia, followed by the oroclinal bending of Alaska, has left Wrangellia flood basalts exposed in an arcuate belt extending ~450 km across south-central Alaska (Fig. 3). Wrangellia stratigraphy forms most of the Wrangell Mountains in the eastern part of southern Alaska and extends westward in a wide belt immediately south of the Denali Fault, along the southern flank of the eastern Alaska Range and in the northern Talkeetna Mountains (Fig. 3). Recent mapping and geophysical studies have recognized Wrangellia basalts (Nikolai Formation) southwest of previously mapped exposures, in the Talkeetna Mountains (Schmidt et al., 2003b; Glen et al., 2007a). Triassic flood basalt stratigraphy may extend several hundred kilometers to the southwest of the Talkeetna Mountains on the Alaska Peninsula (Cottonwood Bay Greenstone of Detterman and Reed, 1980), however, the relationship between these basalts and the Nikolai Formation has not been explored.

Geophysical studies and detailed work on sedimentary basins along the margins of Wrangellia have helped define the boundaries of Wrangellia and led to the development of a model for the accretionary history of southern Alaska (Glenet al., 2007b; Trop and Ridgway, 2007). The northwestern boundary of Wrangellia corresponds with a prominent steeply-dipping structure (Talkeetna Suture Zone), which may represent the original suture between Wrangellia and the former continental margin (Glen et al., 2007a). Mesozoic and Cenozoic sedimentary basins along the inboard margin of Wrangellia, adjacent to and overlying the Talkeetna Suture Zone and Denali Fault, record the uplift and collisional history of Wrangellia and the former continental margin, north of the Denali Fault (Trop et al., 2002; Ridgeway et al., 2002; Trop and Ridgeway, 2007). The southern boundary of Wrangellia in Alaska is interpreted to lie along a prominent northeast-trending geophysical gradient separating Wrangellia units to the north from parts of the Peninsular Terrane to the south (Glenet al., 2007b).

***Talkeetna Mountains and Eastern Alaska Range***

The westernmost Wrangellia stratigraphy in the Talkeetna Mountains consists of Paleozoic strata that are intruded by mafic sills associated with Nikolai basalts. The Wrangellia basement consists of siliceous argillite, siltstone, and chert interbedded with limestone, which are similar to Paleozoic sedimentary units in the Wrangell Mountains (Schmidt and Rogers, 2007). The arc sequences that are typical of Wrangellia basement in the Alaska Range and Wrangell Mountains are absent or unexposed in the Talkeetna Mountains. A rare quartz-pebble conglomerate has been recognized in the Talkeetna Mountains that has not been reported elsewhere beneath the flood basalts (Schmidtet al., 2003a). The overall thickness of Nikolai basalts is limited in the Talkeetna Mountains (~300 m) and only minor occurrences of overlying sedimentary rocks have been reported (Schmidt and Rogers, 2007).

From southwest of the Clearwater Mountains eastward to the Amphitheater Mountains, volcanic stratigraphy of the Nikolai Formation is nearly 4 km thick and is exposed in a discontinuous belt (Fig. 3). There are limited exposures of underlying Paleozoic units in this area. In the Clearwater Mountains, the base of the volcanic stratigraphy consists of pillowed flows overlying interlayered shale and mafic sills. The pillow basalt contains sediment derived from directly underlying beds filling voids between small-diameter pillows (<1 m). The total thickness of the pillowed flows is less than several hundred meters and they are overlain by predominantly massive subaerial flows. Picritic pillow lavas with abundant olivine pseudomorphs occur within the basal pillowed flows (Greeneet al., 2008).

In the Clearwater Mountains, the upper part of the volcanic stratigraphy is primarily subaerial flows (and rarely sills) with columnar jointing preserved in several of the thicker flows (<25 m). Smith (1981) described minor occurrences of tuff, flow breccia, and limestone and argillite lenses within the volcanic stratigraphy. These rare interbedded horizons are mainly found in the lower parts or at the top of the volcanic stratigraphy (Smith, 1981). Tuffaceous layers (or redistributed hyaloclastite) occur within layered carbonaceous argillite or are a mixture of volcanic clasts and carbonaceous matter (Smith, 1981). Diagnostic index fossils (the bivalve *Halobia* and the ammonoid *Tropites*) have been found in intervolcanic sedimentary lenses at the top of the volcanic stratigraphy and in strata overlying the basalts (Smith, 1981). The complex interbedding of volcanic and sedimentary horizons gives way to fine-grained marine sedimentary strata above the flood basalts.

In the eastern Alaska Range, Paleozoic volcanic and volcaniclastic rocks of the Tetelna Volcanics form isolated exposures east of the Amphitheater Mountains, where they are intruded by plutonic rocks related to the Nikolai basalts (Nokleberg et al., 1992). Pre-flood basalt sedimentary units are mostly non-fossiliferous carbonaceous black shale and siliceous argillite (Blodgett, 2002). Some of the best exposures of Wrangellia flood basalt stratigraphy are preserved as part of an east-west-trending synform underlain by mafic and ultramafic plutonic rocks in the Amphitheater Mountains (Fig. 4). The synform is dissected by several north-south-trending U-shaped glacial valleys filled with elongate lakes that provide access to kilometer-high exposures of volcanic stratigraphy. The Amphitheater Mountains synform is largely intact and much of the stratigraphy lacks pervasive faulting. Five large sheet-like mafic-ultramafic intrusions, which occur within argillites underlying the flood basalts, are exposed around the Amphitheater Mountains (Schmidt and Rogers, 2007).

Volcanic stratigraphy in the Amphitheater Mountains is very similar to the Clearwater Mountains. The lowest exposures are argillite and shale underlying the pillowed flows and intruded by numerous massive sills (Fig. 4). The lowermost pillowed flows engulf sediment of underlying strata and only occur in the lowest several hundred meters of stratigraphy (~10-15% of the total section). Tuffs and breccia are preserved in the submarine part of the stratigraphic section below the transition from submarine to subaerial flows. Mafic sills form parts of the lower volcanic stratigraphy and are locally interbedded with tuff and breccia (Fig. 4). There are approximately 3 km of subaerial flows overlying the submarine stratigraphy. Neither the top of the flood basalts or significant sections of Late Triassic or Jurassic formations are well exposed in the Amphitheater Mountains.

North of the Eureka Creek Fault is a small area with mafic and ultramafic plutonic rocks and volcanic stratigraphy different from that south of the Eureka Creek Fault within the synform (Fig. 3). Although originally mapped as a separate subterrane from assemblages in the Amphitheater synform by Nokelberg et al. (1985), age constraints indicate that it is in fact part of Wrangellia (Bittenbenderet al., 2007). This area contains a complex sequence of vertically-dipping limestone, shale, and picritic tuff cross-cut by numerous mafic and ultramafic dikes.

***Wrangell Mountains***

Wrangellia flood basalts form two northwest- to southeast-trending belts along the northeast and southwest margins of the Wrangell Mountains, between the Totschunda Fault and Chitina Thrust Belt (Fig. 3). Large Miocene to Recent volcanoes of the Wrangell Mountains volcanic field, Tertiary continental sedimentary rocks, and glaciers overlie most of the central portion of the Wrangell Mountains, covering most of the pre-Cenozoic Wrangellia stratigraphy.

The type Wrangellia Terrane lies in the area between the Totschunda Fault and the Chitina Thrust Belt, although similar assemblages are exposed to the south between the Chitina Thrust Belt and the Border Ranges Fault (Fig. 3). Paleozoic sequences south of the Chitina Thrust Belt have different character than sequences north of the thrust belt. Plafker et al. (1989) interpreted this area between the Chitina Thrust Belt and the Border Ranges Fault, referred to as the Southern Wrangellia Terrane Margin, as a deeper, more metamorphosed equivalent of the type Wrangellia Terrane in the Wrangell Mountains. There are exposures of Nikolai basalts in this area, but these units are not addressed in this paper.

Wrangellia stratigraphy is well-exposed in a shallow northwest-trending syncline along the south side of the Wrangell Mountains. The entire stratigraphy is not exposed in one area, but different areas contain sections of the base, middle, and top of Wrangellia flood basalt stratigraphy (Fig. 4). The base of the volcanic stratigraphy is exposed on the north side of Skolai Creek, where Paleozoic arc volcanic rocks of the Skolai Group form the lowest stratigraphic level exposed of Wrangellia in Alaska (MacKevett, 1978) (Fig. 4). The type section of the Skolai Group north of Skolai Creek is ~2400 m thick (Smith and MacKevett, 1970). The Skolai Group consists of a basal volcanic flow member (~1200 m) and volcaniclastic unit (~750 m) comprising the Station Creek Formation, and a sedimentary package that includes the Hasen Creek Formation (~300 m) and the Golden Horn Limestone Lentil (~250 m locally; Fig. 3). The transition between the lower flow and volcaniclastic members consists of interbedded lava flows and volcaniclastic beds (Smith and MacKevett, 1970). The Hasen Creek is a heterogeneous assemblage of chert, shale, sandstone, bioclastic limestone, and conglomerate, all with very little volcanic-derived material (Smith and MacKevett, 1970). The Golden Horn Limestone is bioclastic grainstone and packstone, locally with 75% of the clasts consisting of crinoid stems, and is also rich in bryozoans, brachiopods, foraminifera, and corals (Smith and MacKevett, 1970). In most places, the Golden Horn Limestone is unconformably overlain by Nikolai basalts with little discordance. In several areas, between the top of the Skolai Group and the base of the Nikolai, there is Middle Triassic argillite (<30 m thick) with fissile shale beds containing imprints of *Daonella*bivalves. Sills and discordant gabbroic intrusions related to the Nikolai occur within the Skolai Group, and sedimentary units of the Hasen Creek may be significantly deformed around these intrusions (MacKevett, 1978).

The Nikolai Formation in the Wrangell Mountains is estimated to be ~3.5 km in total thickness and is almost entirely subaerial flows (MacKevett, 1978). In several areas on the south side of the Wrangell Mountains a thin zone of interbedded flow-conglomerate, pillow breccia, and pillow basalt, typically less than 70 m thick, forms the lowest flow unit of the Nikolai (Fig. 4). The basal flow unit lies directly on shale and contains abundant subrounded pebble- and cobble-sized clasts derived from the Golden Horn Limestone and volcanic rocks of the underlying Skolai Group in a basalt-rich matrix (Fig. 4). Contacts between the basal flow-conglomerate and overlying flows are mostly sharp, but locally conglomerate-rich beds and basaltic lava are interbedded along the upper part of the basal flow unit (MacKevett, 1970).

The flood basalt stratigraphy forms continuous sections over 1000 m thick of monotonous sequences of massive amygdaloidal flows with few discernible features (Fig. 4). There are no interflow sediments or submarine volcanic features within the Nikolai in the Wrangell Mountains (except in the basal flow-conglomerate unit). Amygdules and clusters of plagioclase phenocrysts are typically the only distinguishing features within flows.

A cumulative thickness of over 3.5 km of marine sedimentary rocks, which range in age from Late Triassic to Late Jurassic, overlie the Nikolai basalts. These marine sedimentary strata form impressive cliff-forming sequences in the Wrangell Mountains and the contact between the strongly contrasting black Nikolai basalts and the overlying white Chitistone Limestone is featured along many of the cliffs (Fig. 4). Late Triassic to Early Jurassic limestone and shale successions above the Nikolai have been divided into three formations in the Wrangell Mountains, from oldest to youngest: Chitistone Limestone (350-600 m), Nizina Limestone (100-375 m), and McCarthy Formation (~900 m). The Chitistone disconformably overlies the Nikolai Formation and is gradational into the overlying Nizina Limestone. Faults commonly offset the contact between the uppermost basalt flows and the lowermost Chitistone Limestone; however, the top of the Nikolai is mostly a smooth flat surface. There are local occurrences of regolith between the top of the Nikolai and the base of the Chitistone (Armstronget al., 1969). The carbonates in the lowermost 130 m of the Chitistone indicate deposition in a supratidal to intertidal environment and the stratigraphically higher parts of the Chitistone, up into the Nizina and McCarthy, indicate progressively deeper water marine deposition (Armstrong and MacKevett, 1977).

Wrangellia stratigraphy documented on the northern side of the Wrangell Mountains is similar to that in the southern Wrangell Mountains (Richter, 1976). The Eagle Creek Formation, which underlies the Nikolai basalts, is correlative with the Hasen Creek Formation on the south side of the Wrangell Mountains and has a richly fossiliferous Early Permian limestone member, similar to the Golden Horn Limestone Lentil (Richter, 1976). Richter (1976) documented and mapped (Nabesna A3 and A4 quadrangles) extensive mafic sills intruding the Eagle Creek Formation which make up approximately 70 % of the section beneath the Nikolai basalts. Thin discontinuous lenses of shale and argillite containing imprints of Middle Triassic bivalve *Daonella* are found in several localities between the Eagle Creek and the base of the Nikolai. Richter (1976) describes a basal Nikolai flow unit that is discontinuous volcanic conglomerate-breccia containing fragments of basalt and sedimentary rock derived from the underlying Paleozoic formations. In one area on the north side of the Wrangell Mountains, Richter (1976) describes Permian limestone fragments incorporated in flows as large lenses and masses, up to hundreds of meters long, which may represent flow-rafted debris. The volcanic stratigraphy on the northern side of the Wrangell Mountains is also predominantly subaerial flows. Late Triassic limestone and shale overlying the Nikolai in the northern Wrangell Mountains are correlative with the Chitistone, Nizina, and McCarthy Formations on the south side of the Wrangell Mountains (Richter, 1976).

**Wrangellia in southwest Yukon**

From the Nutzotin Mountains along the Alaska-Yukon border to southeast Alaska, Wrangellia forms a thin northwest- to southeast-trending belt in the southwest corner of Yukon. This belt is separated from several small discontinuous exposures of Wrangellia to the southwest by rocks of the Alexander Terrane. The best exposures of Wrangellia are in the Kluane Ranges, where the stratigraphy is similar in most aspects to stratigraphy in the Wrangell Mountains, and it has been described using the same nomenclature (Muller, 1967; Read and Monger, 1976). The key difference between these two areas is that Wrangellia stratigraphy in Yukon is intensely folded and faulted, and the stratigraphic relationships are commonly difficult to determine. Discontinuous sections of Wrangellia stratigraphy exposed south of the Kluane Ranges have limited exposures of Nikolai basalts.

Paleozoic arc volcanic and marine sedimentary rocks of the Skolai Group are the oldest units of Wrangellia in Yukon (see Supplementary figures). The Skolai Group consists of lower flow and upper volcaniclastic members of the Station Creek Formation conformably overlain by sedimentary units of the Hasen Creek Formation, similar to those described by Smith and MacKevett (1970) in the Wrangell Mountains. Numerous mafic and ultramafic intrusions related to the Nikolai basalts intrude the Skolai Group in Yukon (Carne, 2003). Several occurrences of thin lenses of alternating beds of argillite, siltstone, and sandstone containing Middle Triassic *Daonella* imprints underlie the Nikolai Formation (Read and Monger, 1976). The Middle Triassic unit is very similar to the underlying Hasen Creek Formation and the presence of the *Daonella* is the only discerning characteristic between the two units.

Everywhere in the Kluane Ranges where Middle Triassic sedimentary rocks have been identified they are overlain by a conglomerate and breccia unit assigned to the base of the Nikolai Formation (Read and Monger, 1976; Israel and Cobbett, 2008). The lithological character of the conglomerate/breccia unit is highly variable, ranging from clast supported boulder and pebble conglomerate to matrix supported cobble and pebble breccia. The clasts are primarily derived from the underlying Skolai Group and include the whole spectrum of volcanic and sedimentary rocks observed in the underlying units. Rounded to sub-rounded boulders and pebbles of augite and plagioclase phyric basaltic andesite and lithic tuffs of the Station Creek Formation are common, as are subrounded to subangular mudstone, siltstone and cherty pebbles from the Hasen Creek Formation. The basal conglomerate/breccia and the underlying Middle Triassic sedimentary units are laterally discontinuous and they are bound by faults in several localities (Read and Monger, 1976; Israel and Cobbett, 2008). These structures are interpreted as laterally discontinuous grabens associated with uplift or rifting during the initial stage of Nikolai volcanism.

The Nikolai Formation, in southwest Yukon, includes a marine basal flow unit overlain by a thick succession of dominantly subaerial flows capped by a shallow submarine flow unit. The basal flow unit is predominantly pillow breccia with occurrences of pillow basalt, which is less than 100 m thick (Greeneet al., 2005; Israelet al., 2006). The volcanic stratigraphy in Yukon is ~1 km in total thickness. The subaerial flows (1-10 m thick) are strongly amygdaloidal in zones and are dominantly maroon to olive green. Local thin tuffs and breccias have been reported within the volcanic stratigraphy. In numerous locations within the uppermost portions of the Nikolai Formation, limestone and argillite are interbedded with basalt flows. These thin, discontinuous beds are usually less than 1 meter thick, but locally as thick as 30 m. Microfossils collected from the interbedded limestone units yield a Late Carnian to Late Norian age (Read and Monger, 1976; Israel et al., 2006).

Above the highest stratigraphic flows, massive limestone, including horizons of gypsum, dominates the stratigraphy. The limestone and gypsum are correlatives to the Chitistone Limestone described by MacKevett (1971, 1978) in the Wrangell Mountains. The limestone is often brecciated near the base and includes large blocks of the underlying basalt. The Chitistone Limestone ranges from hundreds of meters thick to less than 10 m thick as discontinuous lenses. Macrofossils are extremely rare in the Chitistone Limestone; however, there are abundant conodonts that yield Late Norian ages (Read and Monger, 1976; Israel and Van Zeyl, 2005). Conformably overlying the Chitistone Limestone is a Late Triassic to Early Jurassic, thinly-bedded argillite and limestone unit assigned to the McCarthy Formation. The McCarthy Formation is easily identifiable in outcrop by alternating light and dark grey calcareous and carbonaceous beds. Abundant macrofossils from the calcareous beds give Late Norian ages (Read and Monger, 1976). An Early Jurassic age for the uppermost McCarthy Formation is suggested by the presence of ammonite-bearing horizons.

**Wrangellia in southeast Alaska**

Triassic basaltic and sedimentary rocks with similarities to Wrangellia sequences in southern Alaska are exposed in several areas of southeast Alaska (see Supplementary maps). Most of these sequences occur as elongate fault-bound slivers within a large and complex fault system. Not all of these sequences are definitively established as part of Wrangellia. Most of these sections occur adjacent to the Alexander Terrane.

Two areas in the northern part of southeast Alaska with thick Triassic basalt sequences (Chilkat Peninsula, Chichagof and Baranof Islands) are probably correlative with Wrangellia flood basalts in southern Alaska (see Supplementary maps). The Chilkat Peninsula area contains Triassic metavolcanic sequences that form a thin (<5 km wide) belt northwest and southeast of Haines, Alaska, along the east side of the Chilkat River and on the Chilkat Peninsula (Plafker and Hudson, 1980). These Triassic basaltic sequences are steeply dipping and are approximately 3000 m in total thickness (Plafker and Hudson, 1980). The metabasalt flows are primarily massive layered amygdaloidal flows with local occurrences of pillow basalt, pillow breccia, and tuff (Plafker and Hudson, 1980). The base of the basaltic sequence is not exposed, but a 300-400 m-thick section in the upper part of the stratigraphy contains abundant pillowed flows and breccia, locally with thin (<1 m) lenses of limestone (Plafker et al., 1989a). Diagnostic Late Carnian macrofossils (ammonoids and bivalves) occur just above the top of the basalt sequence in overlying limestone (Plafkeret al., 1989a). The basalt is overlain by ~1700 m of mostly limestone, carbonaceous argillite, siltstone, and volcanic sandstone (Plafker and Hudson, 1980). These sedimentary sequences are slightly different than the inner-platform carbonate rocks overlying Nikolai basalts in the Wrangell Mountains (Plafker and Hudson, 1980). Late Triassic radiolarians from the overlying sequences on Chilkat Peninsula match species found above Wrangellia flood basalts in the Queen Charlotte Islands (Plafkeret al., 1989b). A thin belt of metabasalt northwest and southeast of Juneau, Alaska, is also lithologically and geochemically similar to Wrangellia flood basalts and may be a continuation of the belt on the Chilkat Peninsula (Gehrels and Barker, 1992).

The stratigraphy on Chichagof and Baranof Islands, which is similar to Wrangellia, may also extend northward along the west side of Tarr Inlet (Decker, 1981). The metabasalt in this area, called the Goon Dip Greenstone, is mostly massive subaerial flows (<1000 m in total thickness) with local pillows (Decker, 1981). The Goon Dip is lithologically and geochemically similar to the Nikolai basalts in the Wrangell Mountains (Decker, 1981). The Goon Dip is overlain by Whitestripe Marble, similar to the Chitistone Limestone in the Wrangell Mountains, but no age-diagnostic fossils have been found in the uppermost Goon Dip or Whitestripe Marble (Decker, 1981).

Metabasaltic sequences of Triassic age, with underlying and overlying Late Triassic sedimentary sequences, are found in several other areas of southeast Alaska (Brew, 2007, written comm.). These areas are believed to be within the Alexander Terrane and may not be correlative with Wrangellia stratigraphy. These units belong to the Hyd Group, mainly exposed on Admirality, Kupreanof Islands and other assorted islands, and the Perseverance succession of Brew (written comm., 2007). The Hyd and Perseverance volcanic rocks contain Triassic basalt ranging from pillow lava, breccia, and tuff to massive flows (Brew, 2007, written comm.), but most of the Hyd Group is non-volcanic (Loney, 1964; Muffler, 1967). Basalt sequences do not exceed 600-700 m in thickness and are more variable and heterogeneous in composition than flood basalt stratigraphy in the main portions of Wrangellia. The basalts are Late Triassic in age, the only fossils associated with the basalts are Early and Middle Norian; Early Norian rocks underlie the basalts and Late Norian rocks overlie them (Muffler, 1967; Katvala and Stanley, 2008).

**Wrangellia in the Queen Charlotte Islands (Haida Gwaii)**

Wrangellia stratigraphy forms a large part of the southern Queen Charlotte Islands and is very similar to Wrangellia stratigraphy on Vancouver Island (Fig. 2). Permian chert, carbonate, and volcaniclastic rocks form the deepest level of exposure of Wrangellia stratigraphy (Hesthammeret al., 1991; Lewiset al., 1991). The Paleozoic marine sequences are overlain by flood basalts of the Karmutsen Formation, but the base of the Karmutsen is not exposed in the Queen Charlotte Islands. The Karmutsen Formation in the Queen Charlotte Islands is similar to basalt stratigraphy on Vancouver Island; however, a section of ~4300 m of Karmtusen basalts measured by Sutherland-Brown (1968) consisted of 95 % submarine flows, with a ratio of pillow basalt to fragmental basalt of ~8:2. Rare occurrences of shale and lenses of tuffaceous crinoidal limestone (<30 m thick), grading between limestone and lapilli tuff, occur in the lowest exposed part of the Karmutsen Formation (Sutherland-Brown, 1968).

The Karmutsen Formation is overlain by Late Triassic and Early Jurassic marine limestone and sedimentary rocks of the Kunga and Maude groups (Lewis et al., 1991). Limestone lenses (1-60 m thick), similar to the overlying Kunga limestone, are locally overlain by tuff in the upper part of the Karmutsen Formation along discontinuous horizons (Sutherland-Brown, 1968). Local interfingering of flows and limestone also occurs in the lowest part of the overlying Kunga Group of Sutherland-Brown (1968). The Kunga Group contains identical fossils and is lithologically indistinguishable from the micritic Quatsino limestone which overlies Karmutsen basalts on Vancouver Island (Sutherland-Brown, 1968).

**Wrangellia on Vancouver Island**

Northern and central Vancouver Island is underlain by Wrangellia stratigraphy which forms the uppermost sheet of a thick sequence of northeast-dipping thrust sheets that constitute the upper crust of Vancouver Island (Fig. 5; Monger and Journeay, 1994; Yorath et al., 1999). The cumulative thickness of Wrangellia stratigraphy exposed on Vancouver Island is more than 10 km (Yorath et al., 1999). Wrangellia lies in fault contact with the Pacific Rim Terrane and West Coast Crystalline Complex to the west, and is intruded by the predominantly Cretaceous Coast Plutonic Complex to the east (Wheeler and McFeely, 1991). Most of the structures and contacts between units on Vancouver Island are northwest-trending. Two prominent northwest- to southeast-trending anticlinoria (Buttle Lake and Cowichan anticlinoria) are cored by Paleozoic rocks, which are not exposed on northern Vancouver Island (Fig. 5; Brandonet al., 1986; Yorathet al., 1999). Jurassic and Cretaceous sedimentary strata overlap Wrangellia stratigraphy on parts of Vancouver Island (Mulleret al., 1974).

*Central and Southern Vancouver Island*

The deepest levels of Wrangellia stratigraphy, mostly exposed in the Buttle Lake and Cowichan anticlinoria, comprise the lower to middle Paleozoic Sicker Group and the upper Paleozoic Buttle Lake Group (Fig. 5). The Devonian to Mississippian Sicker Group comprises volcanics, volcaniclastics, and minor chert (Brandonet al., 1986; Massey and Friday, 1988; Yorathet al., 1999). The overlying Mississippian Buttle Lake Group comprises chert, argillite, and limestone, and Pennsylvanian to Permian limestone, argillite, and chert overlain by minor clastics (Yole, 1969; Brandonet al., 1986; Massey and Friday, 1988; Yorathet al., 1999). The Buttle Lake Group overlies the Sicker Group with some conformable contacts and is unconformably overlain by Triassic strata of the Vancouver Group (Karmutsen and Quatsino formations; Massey and Friday, 1988; Yorath et al., 1999; Nixon and Orr, 2007). The combined total thickness of the Sicker and Buttle Lake Groups is estimated to be ~5000 m (Massey, 1995; Yorathet al., 1999; Fig. 5).

The oldest known rocks on Vancouver Island are pillowed and massive basalt flows of the Devonian Duck Lake Formation (Sicker Group). The Duck Lake Formation is conformably overlain by Upper Devonian interbedded andesitic volcanic and volcaniclastic strata of the Nitinat and McLaughlin Ridge Formations (Massey, 1995). The Buttle Lake Group contains three units (Fourth Lake, Mount Mark, and St. Mary Lake formations) which crop out across Vancouver Island in association with the Sicker Group (Fig. 5). The Fourth Lake Formation (Cameron River Formation of Massey and Friday, 1988) is the lowest and contains mostly thin-bedded, commonly cherty sediments including chert, argillite, possible tuffs, siltstones, volcanic sandstones and minor breccia at the base (Massey and Friday, 1988; Yorath et al., 1999). The overlying Mount Mark Formation either conformably overlies and laterally interfingers with the Fourth Lake Formation or unconformably overlies the Sicker Group (Massey and Friday, 1988; Yorath et al., 1999). This formation comprises massive bioclastic limestone beds dominated by crinoid clasts (<2 cm across), with minor argillite and chert interbeds (Yole, 1969; Massey and Friday, 1988; Yorathet al., 1999; Katvala and Henderson, 2002). The Mount Mark and Fourth Lake Formations may alternate in vertical sections as laterally adjacent facies throughout the entire Pennsylvanian to Early Permian succession (Katvala and Henderson, 2002), although the traditional definitions (Massey and Friday, 1988; Yorath et al., 1999) are maintained in this paper for consistency. The St. Mary Lake Formation comprises sandstone, argillite, conglomerates, and chert that conformably overlie the Mount Mark Formation (Massey and Friday, 1988; Yorath et al., 1999). Exposures of the St. Mary Lake Formation are rare and generally removed by the sub-Triassic unconformity (Massey and Friday, 1988). Conodonts indicate Mississippian to Permian ages in the Buttle Lake Group (Orchard *fide* Brandonet al., 1986; Henderson and Orchard, 1991; Katvala and Henderson, 2002). Paleontologic age determinations can be found in Supplemental data file 5. The upper parts of the Buttle Lake Group (Mount Mark Formation) are commonly intruded by mafic sills related to the Karmutsen basalts (Massey, 1995; Yorathet al., 1999).

The Karmutsen Formation covers large areas of central Vancouver Island, where it forms an emergent oceanic plateau sequence (~6 km). On central Vancouver Island, the base and lower parts of the volcanic stratigraphy are well-exposed in three general areas (Buttle Lake and Cowichan anticlinoria, and the Schoen Lake area; Fig. 5). In each of these areas, thick sediment-sill complexes occur at the base of the Karmutsen basalts, which unconformably overlie Buttle Lake Group limestone and Middle Triassic sedimentary strata.

In the Schoen Lake area, a sediment-sill complex and each of the three subdivisions of the Karmutsen Formation (pillow basalt, pillow breccia and hyaloclastite, and subaerial flows) are preserved (see Supplementary figures). Massive mafic sills intrude siltstone, chert, and interbedded limestone with Middle Triassic *Daonella* occurring near the top of the unit. The sediment-sill complex is approximately 1000 m thick and sedimentary layers between the sills range from 1 to 60 m thick. The sills commonly deform and envelop sediments along contacts (Carlisle, 1972). The sediment-sill complex is overlain by a thick succession (~2000 m) of pillow basalt. Some of the lowest pillowed flows contain sediment in pillow interstices, which is absent higher in the volcanic stratigraphy (Carlisle, 1972).

The volcanic stratigraphy around Buttle Lake is proposed to be the type section for the Karmutsen Formation because close to a complete stratigraphic section (~6000 m thick) is preserved (Yorath et al., 1999; Fig. 6; see Supplementary figures). Basal sills and lower pillowed flows are well-exposed and accessible on the east side of Buttle Lake (Fig. 6). Permian limestone of the Buttle Lake Group (90-120 m thick) on the west side of Buttle Lake is intruded by Karmutsen sills and overlain by pillow lavas (Fig. 6). The lower part of the submarine strata at Buttle Lake is intruded by mafic sills 30-40 m thick (Surdam, 1967). Pillowed flows contain large-diameter pillows (1-4 m) and sediments are rarely present between flows.

Above the submarine flows at Buttle Lake are <1500 m of pillow breccia and hyaloclastite and over 2000 m of massive subaerial flows (Surdam, 1967). Marine fossils were found at one locality within the pillow breccia in the lower part of the Karmutsen (Surdam, 1967). The lower part of the subaerial flow member contains thinner flows than the upper part. The upper parts of the Karmutsen Formation around Buttle Lake contain discontinuous alternations of pillow basalt, pillow breccia, and hyaloclastite typically <30 m thick, but a single, more widespread subaqueous unit is 1-120 m thick (Surdam, 1967). This subaqueous section overlies limestone and tuff up to 30 m thick (Surdam, 1967).

The overlying Quatsino limestone at Buttle Lake lies directly on a Karmutsen basalt flow (Surdam, 1967); however, occurrences of paleosols between the Karmutsen and Quatsino Formations have been reported elsewhere on central Vancouver Island (Yorath et al., 1999). Evidence of molding of limestone around basalt and disaggregation limestone lenses during interaction with basalt flows is described by Surdam (1967). The basal part of the Quatsino Formation west of Buttle Lake is intercalated with pillow basalt in several areas (Surdam, 1967).

*Northern Vancouver Island*

Stratigraphy on northern Vancouver Island extends from Middle to Late Triassic flood basalts (lower part of Karmutsen Formation) up through Middle Jurassic arc volcanics (Fig. 5). This sequence of lithostratigraphic units is divided into the Vancouver Group and the Bonanza Group (Parson Bay Formation, Volcaniclastic-sedimentary unit, and LeMare Lake volcanics; Nixon et al., 2006c; Nixon and Orr, 2007; Fig. 5). The base of the Karmutsen basalts is not exposed on northern Vancouver Island.

Recent mapping on part of northern Vancouver Island has established a three-part volcanic stratigraphy of pillowed lava sequences, hyaloclastite, and subaerial flows. of the stratigraphy has established a structural and stratigraphic framework for volcanic stratigraphy (Nixon et al., 2008; see Supplementary figures). The lower pillowed lava sequence is approximately 3000 m thick and contains closely-packed pillowed flows and massive flows. The massive submarine flows typically have lensoidal geometry, convolute lower contacts with underlying pillowed flows, and rarely exhibit irregular, hackly columnar jointing. Interpillow voids are rarely filled with non-volcanic sediment and display a variety of submarine volcanogenic features. The hyaloclastite unit is estimated to vary in thickness from approximately 1550 m in the west to less than 400 m in the Maynard Lake area (Nixonet al., 2008). The hyaloclastite is predominantly poorly-sorted clasts of pillow basalt in a finely-comminuted matrix of basaltic shards, fragments, and pillow rinds. The hyaloclastite and pillow breccia is composed of a matrix of dark brown, variably palagonatized shards of devitrified basaltic glass with clasts of pillow fragments. Well-bedded basaltic sandstone occurs locally and exhibits soft-sediment deformation features (Nixon et al., 2008). High-Mg picritic pillow lavas have been identified in the lower part of the Karmutsen Formation (Greene et al., 2006; Nixon et al., 2008). Recent mapping and geochemistry of the internal stratigraphy place the high-Mg lavas in the upper part of the submarine section, near the transition between the pillowed lavas and the overlying hyaloclastite unit (Nixon et al., 2008).

The subaerial flow unit appears conformable with the underlying hyaloclastite unit and is approximately 1500 m thick (Nixon et al., 2008). The subaerial flow sequences have a well-layered, sheet-like appearance. The subaerial flows vary in flow thickness, grain size (≤5 mm), and proportion of amygdules, and they rarely exhibit columnar jointing and paleosols are absent between flows. Interflow sedimentary lenses are found mostly near the top of the subaerial flow unit and are commonly associated with pillowed flows and hyaloclastite. Most of these interflow lenses consist of limestone, but rarely comprise siliciclastic sediments (Carlisle and Suzuki, 1974; Nixon et al., 2006). Carlisle and Suzuki (1974) describe small-scale emergent sequences (<30 m thick) of pillow basalt, pillow breccia and hyaloclastite, and massive flows which overlie some limestone lenses. Some of these lenses contain Late Carnian fossil assemblages identical to those found in the overlying Quatsino limestone (Carlisle and Suzuki, 1974). Some subaerial flows near the top of the Karmtusen Formation contain abundant (20-40 %) aligned plagioclase megacrysts (1-2 cm laths), and these can be used as stratigraphic markers (Nixon et al., 2006, 2007).

The relationship between the top of the Karmutsen flood basalts and the base of the overlying Quatsino limestone is a sharp, flat-lying contact with minimal evidence of erosion (Fig. 6). Locally, a thin (<25 cm) layer of brownish-orange basaltic siltstone and sandstone is preserved along the contact (Fig. 6). The thin beds of calcareous siltstone grade laterally into limestone.

The overlying Quatsino limestone varies in thickness (40-500 m) and age (Carnian to Early Norian) across northern Vancouver Island (Nixon et al., 2006, 2007, 2008). The Quatsino Formation immediately above the Karmutsen is mostly a non-fossiliferous massive micritic limestone. The upper part of the Quatsino locally contains a diverse fossil assemblage (Muller et al., 1974; Jeletzky, 1976) and is intercalated and overlain by carbonate clastic sediments, as well as volcanic flows and volcaniclastic deposits of the Parson Bay Formation (Nixon et al., 2006, 2007). Overlying and intercalated with the Parson Bay Formation on northern Vancouver Island are volcanics of the Early to Middle Jurassic Bonanza arc (LeMare Lake volcanics), and equivalent plutonic rocks (Island Plutonic Suite) intrude Wrangellia stratigraphy (Nixon et al., 2006; Nixon and Orr, 2007).

**REFERENCES CITED**

Armstrong, A. K. and MacKevett, E. M., Jr., 1977, The Triassic Chitistone Limestone, Wrangell Mountains, Alaska: U. S. Geological Survey, Open-File Report 77-217, p. D49-D62.

Armstrong, A. K., MacKevett, E. M., Jr. and Silberling, N. J., 1969, The Chitistone and Nizina limestones of part of the southern Wrangell Mountains-a preliminary report stressing carbonate petrography and depositional environments: U. S. Geological Survey, Professional Paper 650-D, p. D49-D62.

Bittenbender, P. E., Bean, K. W., Kurtak, J. M. and Deninger, J., Jr., 2007, Mineral assessment of the Delta River Mining District area, East-central Alaska: U. S. Bureau of Land Management-Alaska, Technical Report 57, 676 p. http://www.blm.gov/pgdata/etc/medialib/blm/ak/aktest/tr.Par.86412.File.dat/BLM_TR57.pdf.

Blodgett, R. B., 2002, Paleontological Inventory of the Amphitheater Mountains, Mt. Hayes A-4 and A-5 Quadrangles, southcentral Alaska: Alaska Division of Geological and Geophysical Surveys, Report of Investigations 2002-3, 11 p.

Brandon, M. T., Orchard, M. J., Parrish, R. R., Sutherland-Brown, A. and Yorath, C. J., 1986, Fossil ages and isotopic dates from the Paleozoic Sicker Group and associated intrusive rocks, Vancouver Island, British Columbia: Geological Survey of Canada Paper 86-1A, Current Research, Part A, p. 683-696.

Brew, D. A. C., 2007, written comm., Unpublished map showing the distribution of the Late Triassic Wrangellia, Hyd Group, and Perserverance group rocks in southeastern Alaska: scale 1:600,000, based on Brew, D. A. C. (Compiler), Unpublished bedrock geologic map of southeastern Alaska.

Carlisle, D., 1972, Late Paleozoic to Mid-Triassic sedimentary-volcanic sequence on Northeastern Vancouver Island: Geological Society of Canada Report of Activities 72-1, Part B, p. 24-30.

Carlisle, D. and Suzuki, T., 1974, Emergent basalt and submergent carbonate-clastic sequences including the Upper Triassic Dilleri and Welleri zones on Vancouver Island: Canadian Journal of Earth Sciences, v. 11, p. 254-279.

Carne, R. C., 2003, Metallogeny of the Kluane Ranges, southwest Yukon Territory: http://www.geology.gov.yk.ca/metallogeny/kluane/index.html.

Coney, P. J., Jones, D. L. and Monger, J. W. H., 1980, Cordilleran suspect terranes: Nature, v. 288(5789), p. 329.

Csejtey, B., Jr., Cox, D. P., Evarts, R. C., Stricker, G. D. and Foster, H. L., 1982, The Cenozoic Denail fault system and the Cretaceous accretionary development of southern Alaska: Journal of Geophysical Research, v. 87, p. 3741-3754.

Decker, J. E., 1981, Geochemical signature of the Goon Dip Greenstone on Chichagof Island, southeastern Alaska: Alaska Division of Geological and Geophysical Surveys, Geologic Report 73G, p. 29-35.

Detterman, R. L. and Reed, B. L., 1980, Stratigraphy, structure, and economic geology of the Iliamna quadrangle, Alaska, U. S. Geological Survey, Bulletin 1368-B, 86 p.

Gehrels, G. E. and Barker, F., 1992, Reconnaissance geochemistry of Permian and Triassic basalts of the Taku and Wrangellia terranes, Southeastern Alaska, in U. S. Geological Survey Geologic Circular, Geologic studies in Alaska by the U. S. Geological Survey, 1992, p. 218-227.

Glen, J. M. G., Schmidt, J. M. and Morin, R., 2007a, Gravity and magnetic studies of the Talkeetna Mountains, Alaska: constraints on the geological and tectonic interpretation of southern Alaska, and implications for mineral exploration, in Ridgway, K. D., Trop, J. M., O’Neill, J. M. and Glen, J. M. G., eds., Tectonic Growth of a Collisional Continental Margin: Crustal Evolution of Southern Alaska: Geological Society of America Special Paper 431, p. 593-622.

Glen, J. M. G., Schmidt, J. M., Pellerin, L., O’Niell, M. and McPhee, D. K., 2007b, Crustal structure of Wrangellia and adjacent terranes inferred from geophysical studies along a transect through the northern Talkeetna Mountains, in Ridgway, K. D., Trop, J. M., O’Neill, J. M. and Glen, J. M. G., eds., Tectonic Growth of a Collisional Continental Margin: Crustal Evolution of Southern Alaska: Geological Society of America Special Paper 431, p. 21-42.

Greene, A. R., Scoates, J. S., Weis, D. and Israel, S., 2005, Flood basalts of the Wrangellia Terrane, southwest Yukon: Implications for the formation of oceanic plateaus, continental crust and Ni-Cu-PGE mineralization, in Emond, D. S., Lewis, L. L. and Bradshaw, G. D., eds., Yukon Exploration and Geology 2004: Yukon Geological Survey. p. 109-120.

Greene, A. R., Scoates, J. S., Nixon, G. T. and Weis, D., 2006, Picritic lavas and basal sills in the Karmutsen flood basalt province, Wrangellia, northern Vancouver Island, in Grant, B., ed., Geological Fieldwork 2005: British Columbia Ministry of Energy, Mines and Petroleum Resources, Paper 2006-1, p. 39-52.

Greene, A. R., Scoates, J. S. and Weis, D., 2008, Wrangellia flood basalts in Alaska: A record of plume-lithosphere interaction in a Late Triassic accreted oceanic plateau: Geochemistry, Geophysics, Geosystems, v. 9, Q12004, doi:10.1029/2008GC002092.

Henderson, C. M. and Orchard, M. J., 1991, Gondolelloides, a new Lower Permian conodont genus from western and northern Canada., in Orchard, M. J. and McCracken, A. D., eds., Ordovician to Triassic Conodont Paleontology of the Canadian Cordillera: Geological Survey of Canada Bulletin 417, p. 253-267.

Hesthammer, J., Indrelid, J., Lewis, P. D. and Orchard, M. J., 1991, Permian strata on the Queen Charlotte Islands, British Columbia, in Current Research, Part A, Cordillera and Pacific margin: Geological Survey of Canada, Report 91-01A, p. 321-329.

Israel, S. and Cobbett, R., 2008, Kluane Ranges bedrock geology, White River area (Parts of NTS 115F/9, 15 and 16; 115G/12 and 115K/1, 2), in Emond, D. S., Blackburn, L. R., Hill, R. P. and Weston, L. H., eds., Yukon Exploration and Geology 2007: Yukon Geological Survey. p. 153-167.

Israel, S., Tizzard, A. and Major, J., 2006, Bedrock geology of the Duke River area, parts of NTS 115G/2, 3, 4, 6 and 7, southwestern Yukon, in Emond, D. S., Bradshaw, G. D., Lewis, L. L. and Weston, L. H., eds., Yukon Exploration and Geology 2005: Yukon Geological Survey, p. 139-154.

Israel, S. and Van Zeyl, D. P., 2005, Preliminary geology of the Quill Creek map area, southwest Yukon parts of NTS 115G/5, 6 and 12, in Emond, D. S., Lewis, L. L. and Bradshaw, G. D., eds., Yukon Exploration and Geology 2004: Yukon Geological Survey, p. 129-146.

Jeletzky, J. A., 1976, Mesozoic and Tertiary rocks of Quatsino Sound, Vancouver Island, British Columbia: Geological Survey of Canada, Bulletin 242, 243 p.

Katvala, E. C. and Henderson, C. M., 2002, Conodont sequence biostratigraphy and paleogeography of the Pennsylvanian-Permian Mount Mark and Fourth Lake Formations, southern Vancouver Island, in Hills, L. V., Henderson, C. M. and Bamber, E. W., eds., Carboniferous and Permian of the World: Canadian Society of Petroleum Geologists Memoir 19, p. 461-478.

Katvala, E. C. and Stanley, G. D., Jr., 2008, Conodont biostratigraphy and facies correlations in a Late Triassic island arc, Keku Strait, Southeast Alaska, in Blodgett, R. B. and Stanley, G. D., Jr., eds., The Terrane Puzzle: New Perspectives on Paleontology and Stratigraphy from the North American Cordillera: Geological Society of America, Special Paper 442, p. 181-226.

Lewis, P. D., Haggart, J. W., Anderson, R. G., Hickson, C. J., Thompson, R. I., Dietrich, J. R. and Rohr, K. M. M., 1991, Triassic to Neogene geological evolution of the Queen Charlotte region: Canadian Journal of Earth Sciences, v. 28(6), p. 854-869.

Loney, R. A., 1964, Stratigraphy and petrography of the Pybus-Gambier area, Admiralty Island, Alaska: U. S. Geological Survey, Bulletin 1178.

MacKevett, E. M., Jr., 1970, Geology of the McCarthy B-4 quadrangle, Alaska: U.S. Geological Survey, Bulletin 1333, 31 p.

MacKevett, E. M., Jr., 1971, Stratigraphy and general geology of the McCarthy C-5 Quadrangle, Alaska: U. S. Geological Survey, Bulletin 1323, 35 p.

MacKevett, E. M., Jr., 1978, Geologic map of the McCarthy Quadrangle, Alaska: U. S. Geological Survey, Miscellaneous Investigations Series Map I-1032, scale 1:250,000.

Massey, N. W. D., 1995, Geology and mineral resources of the Alberni-Nanaimo Lakes sheet, Vancouver Island 92F/1W, 92F/2E, and part of 92F/7E: B.C. Ministry of Energy, Mines and Petroleum Resources, Paper 1992-2, 132 p.

Massey, N. W. D. and Friday, S. J., 1988, Geology of the Chemainus River-Duncan Area, Vancouver Island (92C/16; 92B/13), in Geological Fieldwork 1987: B.C. Ministry of Energy, Mines and Petroleum Resources, Paper 1988-1, p. 81-91.

Monger, J. W. H. and Journeay, J. M., 1994, Basement geology and tectonic evolution of the Vancouver region, in Monger, J. W. H., ed., Geology and Geological Hazards of the Vancouver Region, Southwestern British Columbia: Geological Survey of Canada, Bulletin 481, p. 3-25.

Muffler, L. J. P., 1967, Stratigraphy of the Keku Islets and neighboring parts of Kuiu and Kupreanof Islands, southeastern Alaska: U.S. Geological Survey, Bulletin 1241-C, 52 p.

Muffler, L. J. P., 1967, Stratigraphy of the Keku Islets and neighboring parts of Kuiu and Kupreanof Islands, southeastern Alaska: U.S. Geological Survey, Bulletin 1241-C, 52 p.

Muller, J. E., Northcote, K. E. and Carlisle, D., 1974, Geology and mineral deposits of Alert Bay - Cape Scott map area, Vancouver Island, British Columbia: Geological Survey of Canada, Paper 74-8, 77 p.

Nixon, G. T., Kelman, M. C., Stevenson, D., Stokes, L. A. & Johnston, K. A., 2006, Preliminary geology of the Nimpkish map area (NTS 092L/07), northern Vancouver Island, British Columbia. In: Grant, B. & Newell, J. M., eds., Geological Fieldwork 2005. B.C. Ministry of Energy, Mines and Petroleum Resources Paper 2006-1, p. 135-152

Nixon, G. T. and Orr, A. J., 2007, Recent revisions to the Early Mesozoic stratigraphy of Northern Vancouver Island (NTS 102I; 092L) and metallogenic implications, British Columbia, in Grant, B., ed., Geological Fieldwork 2006: B.C. Ministry of Energy, Mines and Petroleum Resources, Paper 2007-1, p. 163-177.

Nixon, G. T., Laroque, J., Pals, A., Styan, J., Greene, A. R. and Scoates, J. S., 2008, High-Mg lavas in the Karmutsen flood basalts, northern Vancouver Island (NTS 092L): Stratigraphic setting and metallogenic significance, in Grant, B., ed., Geological Fieldwork 2007: B.C. Ministry of Energy, Mines and Petroleum Resources, Paper 2008-1, p. 175-190.

Nokleberg, W. J., Aleinikoff, J. N., Dutro, J. T. J., Lanphere, M. A., Silberling, N. J., Silva, S. R., Smith, T. E. and Turner, D. L., 1992, Map, tables, and summary fossil and isotopic age data, Mount Hayes quadrangle, eastern Alaska Range, Alaska: U. S. Geological Survey Miscellaneous Field Studies Map 1996-D, scale 1:250,000.

Nokleberg, W. J., Jones, D. L. and Silberling, N. J., 1985, Origin and tectonic evolution of the Maclaren and Wrangellia terranes, eastern Alaska Range, Alaska: Geological Society of America Bulletin, v. 96, p. 1251-1270.

Plafker, G., Blome, C. D. and Silberling, N. J., 1989a, Reinterpretation of lower Mesozoic rocks on the Chilkat Peninsula, Alaska, as a displaced fragment of Wrangellia: Geology, v. 17, p, 3-6.

Plafker, G. and Hudson, T., 1980, Regional implications of the Upper Triassic metavolcanic and metasedimentary rocks on the Chilkat Peninsula, southeastern Alaska, Canadian Journal of Earth Sciences, v. 17(6), p. 681-689.

Plafker, G., Nokleberg, W. J. & Lull, J. S., 1989b, Bedrock geology and tectonic evolution of the Wrangellia, Peninsular, and Chugach terranes along the Trans-Alaskan Crustal Transect in the northern Chugach Mountains and southern Copper River basin, Alaska. Journal of Geophysical Research 94, 4, p.255-4,295.

Read, P. B. and Monger, J. W. H., 1976, Pre-Cenozoic volcanic assemblages of the Kluane and Alsek Ranges, southwestern Yukon Territory: Geological Survey of Canada, Open-File Report 381, 96 p.

Richter, D. H., 1976, Geologic map of the Nabesna Quadrangle, Alaska: U. S. Geological Survey, Miscellaneous Geologic Investigations Map I-932, scale 1:250,000.

Ridgway, K. D., Trop, J. M., Nokleberg, W. J., Davidson, C. M. and Eastham, K. R., 2002, Mesozoic and Cenozoic tectonics of the eastern and central Alaska Range: Progressive basin development and deformation in a suture zone. Geological Society of America Bulletin 114, 1, p. 480-1,504.

Schmidt, J. M., O'Neill, J. M., Snee, L. W., Blodgett, R. B., Ridgway, K. D., Wardlaw, B. R. and Blome, C. D., 2003a, The northwestern edge of Wrangellia: Stratigraphic and intrusive links between crustal block from the Peninsular Terrane to Broad Pass: Geological Society of America Cordilleran Section, v. 35, no. 6, p. 560.

Schmidt, J. M. and Rogers, R. K., 2007, Metallogeny of the Nikolai large igneous province (LIP) in southern Alaska and its influence on the mineral potential of the Talkeetna Mountains, in Ridgway, K. D., Trop, J. M., O’Neill, J. M. and Glen, J. M. G., eds., Tectonic Growth of a Collisional Continental Margin: Crustal Evolution of Southern Alaska: Geological Society of America Special Paper 431, p. 623-648.

Schmidt, J. M., Werdon, M. B. and Wardlaw, B., 2003b, New mapping near Iron Creek, Talkeetna Mountains, indicates presence of Nikolai greenstone, in Clautice, K. H. and Davis, P. K., eds., Short Notes on Alaska Geology 2003: Alaska Division of Geological and Geophysical Surveys, Professional Report 120J, p. 101-108.

Smith, J. G. and MacKevett, E. M., Jr., 1970, The Skolai Group in the McCarthy B-4, C-4, C-5 Quadrangles, Wrangell Mountains, Alaska: U. S. Geological Survey, Bulletin 1274-Q, p. Q1-Q26.

Smith, T. E., 1981, Geology of the Clearwater Mountains, south-central Alaska: Alaska Division of Geological and Geophysical Surveys, Geologic Report 60, 72 p, http://www.dggs.dnr.state.ak.us/scan2/gr/text/GR60.PDF.

Sutherland Brown, A., 1968, Geology of the Queen Charlotte Islands, British Columbia: B. C. Department of Mines and Petroleum Resources, Bulletin 54, 226 p.

Trop, J. M., Ridgway, K. D., Manuszak, J. D. and Layer, P. W., 2002, Mesozoic sedimentary-basin development on the allochthonous Wrangellia composite terrane, Wrangell Mountains basin, Alaska: A long-term record of terrane migration and arc construction. Geological Society of America Bulletin, v. 114, p. 693-717.

Trop, J. M. and Ridgway, K. D., 2007, Mesozoic and Cenozoic tectonic growth of southern Alaska: A sedimentary basin perspective, in Ridgway, K. D., Trop, J. M., O'Neill, J. M. and Glen, J. M. G., eds., Tectonic Growth of a Collisional Continental Margin: Crustal Evolution of Southern Alaska: Geological Society of America, Special Paper 431, p. 55-94.

Wheeler, J. O. and McFeely, P., 1991, Tectonic assemblage map of the Canadian Cordillera and adjacent part of the United States of America: Geological Survey of Canada Map 1712A.

Yole, R. W., 1969, Upper Paleozoic stratigraphy of Vancouver Island, British Columbia: Proceedings of the Geological Association of Canada, v. 20, p. 30-40.

Yorath, C. J., Sutherland Brown, A. and Massey, N. W. D., 1999, LITHOPROBE, southern Vancouver Island, British Columbia: Geological Survey of Canada, Bulletin 498, 145 p.
